# Supplementary material for: New conformationally flexible and recyclable aryl iodine catalysts from an inexpensive chiral source for asymmetric oxidations
Source: Royal Society of Chemistry journal article supplement (doi:10.1039/d3gc02429f), 2023-01-01
Supplement: d3gc02429f1.pdf [file d3gc02429f1.pdf]

## Supplementary Information

# New conformationally flexible and recyclable aryl iodine catalysts from inexpensive chiral source for asymmetric oxidations

Hai-Jie Zhou,<sup>1</sup> Yi-Ping Yao,<sup>1</sup> Tonghui Zhang,<sup>5</sup> Biao Chen,<sup>1</sup> Xu Wang,<sup>1</sup> Jie Zeng,<sup>5</sup> Hang Zhao,<sup>1</sup> Jian-Ai Chen,<sup>1</sup> Xiao Xiao,<sup>\*,1</sup> Fen-Er Chen<sup>\*,1,2,3,4,5</sup>

<sup>1</sup>Institute of Pharmaceutical Science and Technology, Collaborative Innovation Center of Yangtze River Delta Region Green Pharmaceuticals, Zhejiang University of Technology, Hangzhou 310014, P. R. China

<sup>2</sup>College of Chemistry and Chemical Engineering, Jiangxi Normal University, Nanchang, 330022, P. R. China

<sup>3</sup>Engineering Center of Catalysis and Synthesis for Chiral Molecules, Shanghai Engineering Center of Industrial Asymmetric Catalysis for Chiral Drugs, Fudan University, Shanghai 200433, P. R. China

<sup>4</sup>Shanghai Engineering Center of Industrial Asymmetric Catalysis for Chiral Drugs, Shanghai 200433, P. R. China

<sup>5</sup>Pharmaceutical Research Institute, Wuhan Institute of Technology, Wuhan 430205, P. R. China.

## Table of Contents

|                                                                                                                  |    |
|------------------------------------------------------------------------------------------------------------------|----|
| 1. Supplementary methods .....                                                                                   | 3  |
| 2. Synthesis of the starting materials .....                                                                     | 5  |
| 3. Catalysts, solvent and temperature optimization .....                                                         | 6  |
| 4. General procedure and spectra data of catalyst .....                                                          | 10 |
| 4.1 General procedure for synthesis of catalyst starting from (1 <i>S</i> ,2 <i>S</i> )-ANP. ....                | 10 |
| 4.1.1 General procedure for synthesis of intermediate <b>11</b> .....                                            | 10 |
| 4.1.2 General procedure for synthesis of silicon-based catalysts .....                                           | 13 |
| 4.1.3 General procedure for synthesis of ester catalysts.....                                                    | 14 |
| 4.1.4 General procedure for synthesis of ether-substituted catalysts.....                                        | 16 |
| 4.1.5 General procedure for synthesis of 2-iodo-5-substituted catalysts.....                                     | 17 |
| 4.2 Hundred grams scale procedure for synthesis of intermediate <b>11</b> .....                                  | 18 |
| 4.3 General procedure for synthesis of catalyst starting from <i>D</i> -threonine.....                           | 19 |
| 4.4 General procedure for catalyst of the <i>N</i> -H bond of the amide moiety changed to <i>N</i> -Me bond..... | 23 |
| 4.5 Characterization of catalysts and intermediates. ....                                                        | 23 |

|                                                                                                                 |     |
|-----------------------------------------------------------------------------------------------------------------|-----|
| <b>5. General procedure of recycle experiments in oxidative dearomatization</b> .....                           | 49  |
| <b>6. Gram scale operation</b> .....                                                                            | 51  |
| <b>7. Spectra data of substrate</b> .....                                                                       | 52  |
| 7.1 Characterization of enantioselective oxidative dearomatization .....                                        | 52  |
| 7.2 Characterization of oxidative spirolactonization.....                                                       | 72  |
| 7.3 Characterization of direct C(sp <sup>2</sup> )-H/C(sp <sup>3</sup> )-H cross-coupling.....                  | 78  |
| 7.4 Characterization of oxidative fluorination of keto esters. ....                                             | 84  |
| <b>8. Investigation of the significance for H-bond interactions and tunable chiral pocket</b> .                 | 94  |
| <b>9. Possible mechanism of the reactions</b> .....                                                             | 100 |
| 9.1 Possible mechanism and DFT calculation of the enantioselective oxidative dearomatization. ....              | 100 |
| 9.2 Possible mechanism of the asymmetric spirocyclization reaction. ....                                        | 102 |
| 9.3 Possible mechanism of the direct C(sp <sup>2</sup> )-H/C(sp <sup>3</sup> )-H oxidative cross-coupling. .... | 103 |
| 9.4 Possible mechanism of the asymmetric oxidative fluorination of keto esters.....                             | 104 |
| <b>10. Reference</b> .....                                                                                      | 105 |
| <b>11. X-ray crystallography analysis</b> .....                                                                 | 108 |
| <b>12. <sup>1</sup>H, <sup>13</sup>C, <sup>19</sup>F spectrum of compounds</b> .....                            | 113 |
| 12.1 NMR spectra of intermediates and catalyst.....                                                             | 113 |
| 12.2 NMR spectra of product .....                                                                               | 162 |
| 12.2.1 Spectrum of enantioselective oxidative dearomatization .....                                             | 162 |
| 12.2.2 Spectrum of oxidative spirolactonization .....                                                           | 187 |
| 12.2.3 Spectrum of direct C(sp <sup>2</sup> )-H/C(sp <sup>3</sup> )-H cross-coupling .....                      | 193 |
| 12.2.4 Spectrum of oxidative fluorination of keto esters.....                                                   | 199 |

## 1. Supplementary methods

**General information.** All experiments were conducted under air atmosphere unless otherwise noted.  $^1\text{H}$  and  $^{13}\text{C}$  NMR spectra were recorded on a Bruker Ascend<sup>TM</sup> 400 (400 MHz) spectrometer. Chemical shifts were reported in parts per million (ppm), and the residual solvent peak was used as an internal reference:  $^1\text{H}$  ( $\text{CDCl}_3$   $\delta$  7.26;  $\text{DMSO-d}^6$   $\delta$  2.50),  $^{13}\text{C}$  ( $\text{CDCl}_3$   $\delta$  77.16;  $\text{DMSO-d}^6$   $\delta$  39.5). Data are reported as follows: chemical shift, multiplicity (s = singlet, d = doublet, t = triplet, q = quartet, m = multiplet, br = broad), coupling constants (Hz) and integration. For thin layer chromatography (TLC), Huanghai precoated TLC plates (GF254) were used, and compounds were visualized with a UV light at 254 nm. High resolution mass spectra (HRMS) were obtained on an Agilent 1290II-6545 spectrometer. Optical rotations were recorded on a Rudolph Research Analytical Autopol I automatic polarimeter. Enantiomeric excesses (*ee*) were determined by HPLC analysis on Agilent HPLC units; column of Chiralcel OD-H, Chiralpak AD-H or AS-H was used. Melting point (MP) was obtained on Hanon MP-430. Column chromatography was performed with silica gel (200-300 mesh ASTM). Unless otherwise noted, commercially available reagents purchased from Adamas-beta, TCI, Rhawn or Energy Chemical and were used as received.

### Computational details

All the species are fully optimized at the M06-2X level<sup>[1]</sup>, the 6-31G(d,p)<sup>[2]</sup> basis set is used for H, C, N, O atom, and the LANL2D2 ECP basis set<sup>[3]</sup> is used for I atom. Frequency analyses are performed at the same level to confirm that the characteristics of the structures are minima (without imaginary frequencies) or transition states (only one imaginary frequency). Calculations of the intrinsic reaction coordinates (IRC)<sup>[4-5]</sup> are calculated to ensure that the transition states indeed have connected two minima. The single-point energies calculated at M06-2X Level<sup>[1]</sup>, the 6-311++G(d,p)<sup>[2]</sup> level basis set is used for H, C, N, O atom. The single-point energies are added to the Gibbs

free energy correction to obtain the Gibbs free energies ( $\Delta G$ ). All these calculations are performed with Gaussian 16 program<sup>[6]</sup>.

## 2. Synthesis of the starting materials

- 1) 1-naphthol carboxylic acid **12a-12l** were synthesized according to the literature<sup>[7]</sup>.
- 2) 2-naphthol carboxylic acid **12m-12o** were synthesized according to the literature<sup>[8]</sup>.
- 3) 1-naphthol carboxylic alcohol were synthesized according to the literature<sup>[9]</sup>.
- 4) 1-hydroxy-*N*-aryl-2-naphthamide derivatives **15a-15f** were synthesized according to the literature<sup>[10]</sup>.
- 5) Anilide derivatives **17a-17f** were synthesized according to the literature<sup>[11]</sup>.
- 6) Keto esters derivatives **19a-19k** were synthesized according to the literature<sup>[12]</sup>.

### 3. Catalysts, solvent and temperature optimization

**Supplementary Table 1.** Optimization of enantioselective oxidative dearomatization<sup>a,b,c</sup>

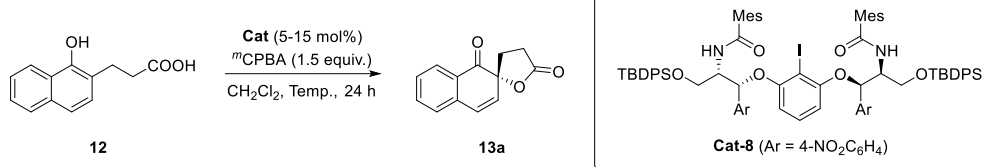

| Entry | Cat (mol%)  | Temp. (°C) | Solvent                         | Yield (%) | ee (%) | Entry | Cat (mol%)              | Temp. (°C) | Solvent                                             | Yield (%) | ee (%) |
|-------|-------------|------------|---------------------------------|-----------|--------|-------|-------------------------|------------|-----------------------------------------------------|-----------|--------|
| 1     | Cat-1 (15)  | -30        | CH <sub>2</sub> Cl <sub>2</sub> | 45        | 85     | 11    | Cat-33 (15)             | 0          | CH <sub>2</sub> Cl <sub>2</sub>                     | 80        | 92     |
| 2     | Cat-2 (15)  | -30        | CH <sub>2</sub> Cl <sub>2</sub> | 66        | 79     | 12    | Cat-8 (15)              | -20        | toluene                                             | 77        | 96     |
| 3     | Cat-6 (15)  | -30        | CH <sub>2</sub> Cl <sub>2</sub> | 56        | 86     | 13    | Cat-8 (15)              | -20        | EtOAc                                               | 44        | 87     |
| 4     | Cat-7 (15)  | -30        | CH <sub>2</sub> Cl <sub>2</sub> | 72        | 91     | 14    | Cat-8 (15)              | -20        | CH <sub>2</sub> Cl <sub>2</sub> + EtOH <sup>d</sup> | 92        | 98     |
| 5     | Cat-8 (15)  | -30        | CH <sub>2</sub> Cl <sub>2</sub> | 77        | 98     | 15    | Cat-8 (10) <sup>e</sup> | -20        | CH <sub>2</sub> Cl <sub>2</sub> + EtOH <sup>d</sup> | 80        | 98     |
| 6     | Cat-9 (15)  | -30        | CH <sub>2</sub> Cl <sub>2</sub> | 52        | 90     | 17    | Cat-8 (5) <sup>f</sup>  | -20        | CH <sub>2</sub> Cl <sub>2</sub> + EtOH <sup>d</sup> | 72        | 98     |
| 7     | Cat-11 (15) | -30        | CH <sub>2</sub> Cl <sub>2</sub> | 47        | 86     | 18    | Cat-8 (15)              | -20        | CH <sub>2</sub> Cl <sub>2</sub> + EtOH <sup>g</sup> | 92        | 96     |
| 8     | Cat-21 (15) | -30        | CH <sub>2</sub> Cl <sub>2</sub> | 35        | 75     | 19    | Cat-41 (15)             | -20        | CH <sub>2</sub> Cl <sub>2</sub>                     | trace     |        |
| 9     | Cat-8 (15)  | -20        | CH <sub>2</sub> Cl <sub>2</sub> | 82        | 98     | 20    | Cat-12 (15)             | -20        | CH <sub>2</sub> Cl <sub>2</sub>                     | 70        | 93     |
| 10    | Cat-8 (15)  | 0          | CH <sub>2</sub> Cl <sub>2</sub> | 87        | 96     | 21    | Cat-42 (15)             | -20        | CH <sub>2</sub> Cl <sub>2</sub>                     | 83        | 87     |

<sup>a</sup>**12** (0.2 mmol), **Cat-8** (0.03 mmol, 15 mol%), *m*CPBA (0.3 mmol, 1.5 equiv.) were stirred in CH<sub>2</sub>Cl<sub>2</sub> (10 mL) at -30 to 0 °C for 24 h. <sup>b</sup>Isolated yield. <sup>c</sup>The *ee* value was determined by chiral HPLC. <sup>d</sup>EtOH (1 mmol, 5 equiv.) was added. <sup>e</sup>**Cat-8** (0.02 mmol, 10 mol%) was added. <sup>f</sup>**Cat-8** (0.01 mmol, 5 mol%) was added. <sup>g</sup>CH<sub>2</sub>Cl<sub>2</sub> (5 mL), and EtOH (1 mmol, 5 equiv.) was added.

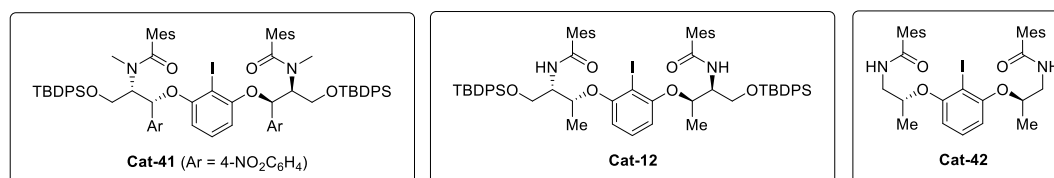

To a Schlenk tube containing **Cat-8**, *m*CPBA (0.3 mmol, 1.5 equiv.), and EtOH were added CH<sub>2</sub>Cl<sub>2</sub> (10 mL) and **12** (0.2 mmol, 1.0 equiv.), the reaction mixture was stirred at 0 to -20 °C for 24 hours, which was then quenched in the sequence of saturated Na<sub>2</sub>S<sub>2</sub>O<sub>3</sub> and NaHCO<sub>3</sub> aqueous solution. The organic layer was extracted by CH<sub>2</sub>Cl<sub>2</sub> and concentrated *in vacuo*. Purification by column chromatography afforded the desired product.

**Supplementary Table 2.** Optimization of enantioselective oxidative spirocyclization<sup>a,b,c</sup>

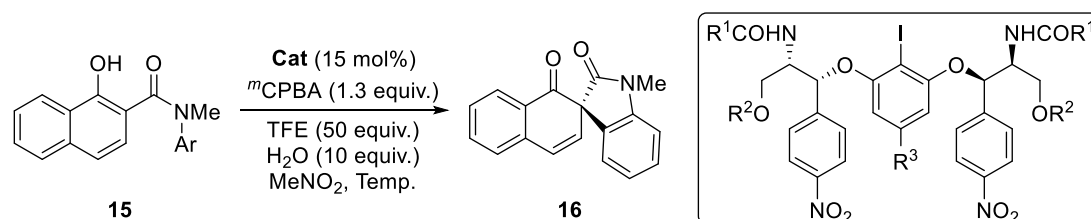

| Entry           | R <sup>1</sup>                                  | R <sup>2</sup> | R <sup>3</sup>                                        | T      | Yield (%) | Time  | ee (%) |
|-----------------|-------------------------------------------------|----------------|-------------------------------------------------------|--------|-----------|-------|--------|
| 1               | Mes                                             | COMes          | H                                                     | -20 °C | 30        | 2 day | 56     |
| 2               | Mes                                             | COMes          | Me                                                    | -20 °C | 27        | 2 day | 53     |
| 3               | Mes                                             | COMes          | COOMe                                                 | -20 °C | 33        | 2 day | 55     |
| 4               | Mes                                             | COMes          | 3,5-di(CF <sub>3</sub> )C <sub>6</sub> H <sub>3</sub> | -20 °C | 25        | 2 day | 53     |
| 5               | Mes                                             | TBDPS          | H                                                     | -20 °C | 35        | 2 day | 70     |
| 6               | Ad                                              | TBDPS          | H                                                     | -20 °C | 39        | 2 day | 96     |
| 7               | 4-OMeC <sub>6</sub> H <sub>4</sub>              | TBDPS          | H                                                     | -20 °C | 36        | 2 day | 85     |
| 8               | 4-NO <sub>2</sub> C <sub>6</sub> H <sub>4</sub> | TBDPS          | H                                                     | -20 °C | 42        | 2 day | 96     |
| 9               | 4-MeC <sub>6</sub> H <sub>4</sub>               | TBDPS          | H                                                     | -20 °C | 37        | 2 day | 79     |
| 10              | 4- <sup>t</sup> BuC <sub>6</sub> H <sub>4</sub> | TBDPS          | H                                                     | -20 °C | 40        | 2 day | 87     |
| 11              | 4-NO <sub>2</sub> C <sub>6</sub> H <sub>4</sub> | TBDPS          | H                                                     | -20 °C | 55        | 5 day | 91     |
| 12              | 4-NO <sub>2</sub> C <sub>6</sub> H <sub>4</sub> | TBDPS          | H                                                     | 0 °C   | 61        | 2 day | 91     |
| 13              | 4-NO <sub>2</sub> C <sub>6</sub> H <sub>4</sub> | TBDPS          | H                                                     | -10 °C | 57        | 3 day | 94     |
| 14 <sup>d</sup> | 4-NO <sub>2</sub> C <sub>6</sub> H <sub>4</sub> | TBDPS          | H                                                     | -10 °C | 43        | 3 day | 92     |
| 15 <sup>e</sup> | 4-NO <sub>2</sub> C <sub>6</sub> H <sub>4</sub> | TBDPS          | H                                                     | -10 °C | 39        | 3 day | 91     |

Conditions: <sup>a</sup>15 (0.2 mmol), **Cat-9** (0.03 mmol, 15 mol%), <sup>m</sup>CPBA (0.26 mmol, 1.3 equiv.), TFE (10 mmol, 50 equiv.) and H<sub>2</sub>O (2 mmol, 10 equiv.) were stirred in MeNO<sub>2</sub> (3 mL) at -10 °C.

<sup>b</sup>Isolated yield. <sup>c</sup>The *ee* value was determined by chiral HPLC. <sup>d</sup>Without H<sub>2</sub>O. <sup>e</sup>Without TFE.

To a Schlenk tube containing **Cat-9** (0.03 mmol, 15 mol%), <sup>m</sup>CPBA (0.26 mmol, 1.3 equiv.), TFE (10 mmol, 50 equiv.), H<sub>2</sub>O (2 mmol, 10 equiv.) and MeNO<sub>2</sub> (3 mL) were added **15** (0.2 mmol, 1.0 equiv.), the reaction mixture was stirred at -10 °C for 72 hours, which was then quenched in the sequence of saturated Na<sub>2</sub>S<sub>2</sub>O<sub>3</sub> and NaHCO<sub>3</sub> aqueous solution. The organic layer was extracted by CH<sub>2</sub>Cl<sub>2</sub> and concentrated *in vacuo*. Purification by column chromatography afforded the desired product.

**Supplementary Table 3.** Optimization of enantioselective direct C(sp<sup>2</sup>)-H/C(sp<sup>3</sup>)-H cross-coupling.<sup>a,b,c,d</sup>

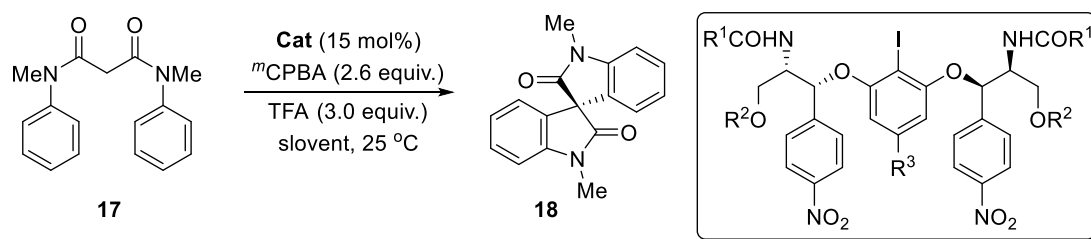

| Entry           | R <sup>1</sup>                                  | R <sup>2</sup> | R <sup>3</sup>                                        | Yield (%) | Solvent       | ee (%) |
|-----------------|-------------------------------------------------|----------------|-------------------------------------------------------|-----------|---------------|--------|
| 1               | Mes                                             | COMes          | H                                                     | 23        | MeCN          | 4      |
| 2               | Mes                                             | COMes          | Me                                                    | 27        | MeCN          | 0      |
| 3               | Mes                                             | COMes          | COOMe                                                 | 35        | MeCN          | 0      |
| 4               | Mes                                             | COMes          | 3,5-di(CF <sub>3</sub> )C <sub>6</sub> H <sub>3</sub> | 20        | MeCN          | 0      |
| 5               | Mes                                             | TBDPS          | H                                                     | 60        | MeCN          | 7      |
| 6               | NH(4-Me)C <sub>6</sub> H <sub>4</sub>           | TBDPS          | H                                                     | 72        | MeCN          | 74     |
| 7 <sup>d</sup>  | NH(4-Me)C <sub>6</sub> H <sub>4</sub>           | TBDPS          | H                                                     | N.R.      | MeCN          | 00     |
| 8               | NH(4-Me)C <sub>6</sub> H <sub>4</sub>           | TBDPS          | H                                                     | 42        | Benzonitrile  | 50     |
| 9               | NH(4-Me)C <sub>6</sub> H <sub>4</sub>           | TBDPS          | H                                                     | 37        | Butyronitrile | 83     |
| 10              | 4-MeC <sub>6</sub> H <sub>4</sub>               | TBDPS          | H                                                     | 40        | Butyronitrile | 84     |
| 11              | 4- <sup>t</sup> BuC <sub>6</sub> H <sub>4</sub> | TBDPS          | H                                                     | 43        | Butyronitrile | 77     |
| 12              | <sup>t</sup> Bu                                 | TBDPS          | H                                                     | 52        | Butyronitrile | 86     |
| 13              | <sup>t</sup> Bu                                 | TBDPS          | H                                                     | 72        | MeCN          | 84     |
| 14 <sup>e</sup> | <sup>t</sup> Bu                                 | TBDPS          | H                                                     | 72        | MeCN          | 90     |

Conditions: <sup>a</sup>17 (0.2 mmol), **Cat-3** (0.03 mmol, 15 mol%), <sup>m</sup>CPBA (0.52 mmol, 2.6 equiv.), TFA (0.6 mmol, 3 equiv.) were stirred in MeCN (3 mL) at 25 °C for 16 h. <sup>b</sup>Isolated yield. <sup>c</sup>The ee value was determined by chiral HPLC. <sup>d</sup>0 °C. <sup>e</sup> H<sub>2</sub>O (3.0 equiv.) was added.

To a Schlenk tube containing **Cat-3** (0.03 mmol, 15 mol%), <sup>m</sup>CPBA (0.52 mmol, 2.6 equiv.), TFA (0.6 mmol, 3 equiv.) and H<sub>2</sub>O and MeCN (3 mL) were added **17** (0.2 mmol, 1.0 equiv.), the reaction mixture was stirred at 25 °C for 16 hours, which was then quenched in the sequence of saturated Na<sub>2</sub>S<sub>2</sub>O<sub>3</sub> and NaHCO<sub>3</sub> aqueous solution. The organic layer was extracted by EtOAc and concentrated *in vacuo*. Purification by column chromatography afforded the desired product.



**Supplementary Table 4.** Optimization of enantioselective oxidative fluorination of keto esters.<sup>a,b,c</sup>

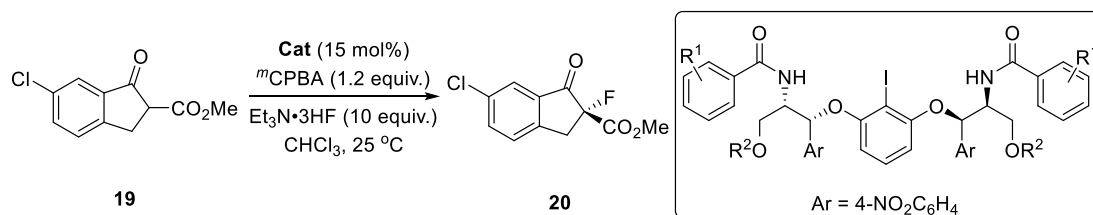

| Entry          | R <sup>1</sup>        | R <sup>2</sup>                                 | Yield (%) | ee (%) |
|----------------|-----------------------|------------------------------------------------|-----------|--------|
| 1              | H                     | COMes                                          | 55        | 44     |
| 2              | 2,6-diMe              | COMes                                          | 57        | 61     |
| 3              | 3,5-diCF <sub>3</sub> | COMes                                          | 52        | 54     |
| 4              | 3,5-diCl              | COMes                                          | 60        | 50     |
| 5              | 2,4,6-triMe           | COMes                                          | 55        | 60     |
| 6              | 4-NO <sub>2</sub>     | COMes                                          | 54        | 33     |
| 7              | 2,4,6-triCl           | COMes                                          | 59        | 65     |
| 8 <sup>d</sup> | 2,4,6-triCl           | COMes                                          | 27        | 67     |
| 9              | 2,4,6-triBr           | COMes                                          | 59        | 72     |
| 10             | 2,4,6-triCl           | C(C <sub>6</sub> H <sub>5</sub> ) <sub>3</sub> | 59        | 80     |
| 11             | 2,4,6-triBr           | C(C <sub>6</sub> H <sub>5</sub> ) <sub>3</sub> | 57        | 90     |

<sup>a</sup>19 (0.2 mmol), **Cat-38** (0.03 mmol, 15 mol%), *m*CPBA (0.3 mmol, 1.5 equiv.), and Et<sub>3</sub>N·3HF (2 mmol, 10 equiv.) were stirred in CHCl<sub>3</sub> (8 mL) at 25 °C for 24 h. <sup>b</sup>Isolated yield. <sup>c</sup>The *ee* value was determined by chiral HPLC. <sup>d</sup>DPIEA·3HF (2 mmol, 10 equiv.) was added instead of Et<sub>3</sub>N·3HF.

To a Teflon tube containing  $\beta$ -ketoesters **19** (0.20 mmol, 1.0 equiv.), **Cat-38** (0.03 mmol, 15 mol%), and CHCl<sub>3</sub> (8 mL) were added amine·HF (2 mmol, 10 equiv.) and *m*CPBA (0.3 mmol, 1.5 equiv.) in turn, the reaction mixture was stirred at 25 °C for 24-72 hours, which was then quenched in the sequence of saturated Na<sub>2</sub>S<sub>2</sub>O<sub>3</sub> and NaHCO<sub>3</sub> aqueous solution. The organic layer was extracted by CH<sub>2</sub>Cl<sub>2</sub> and concentrated *in vacuo*. Purification by column chromatography afforded the desired product.

## 4. General procedure and spectra data of catalyst

### 4.1 General procedure for synthesis of catalyst starting from (1*S*,2*S*)-ANP.

#### 4.1.1 General procedure for synthesis of intermediate 11

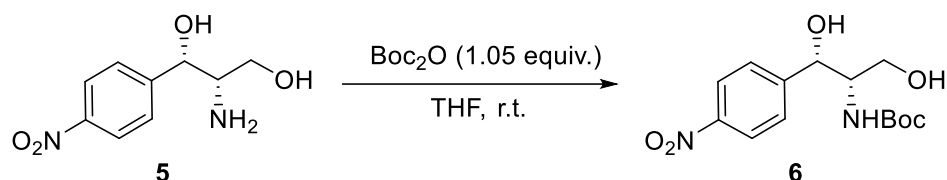

According to a modified literature procedure,<sup>[13]</sup> to a 1-L round bottom flask containing (1*S*,2*S*)-ANP (330 mmol, 1.0 equiv.) were dissolved in THF (500 mL) at 0 °C, Boc<sub>2</sub>O (346.5 mmol, 1.05 equiv.) was added dropwise and reaction mixture was allowed to stir at ambient temperature until full conversion of (1*S*,2*S*)-ANP, as shown by TLC. The organic layers were concentrated under vacuum. The crude product was recrystallized using ethyl acetate to afford the **6** (93.6 g, 91% yield) in a pure form.

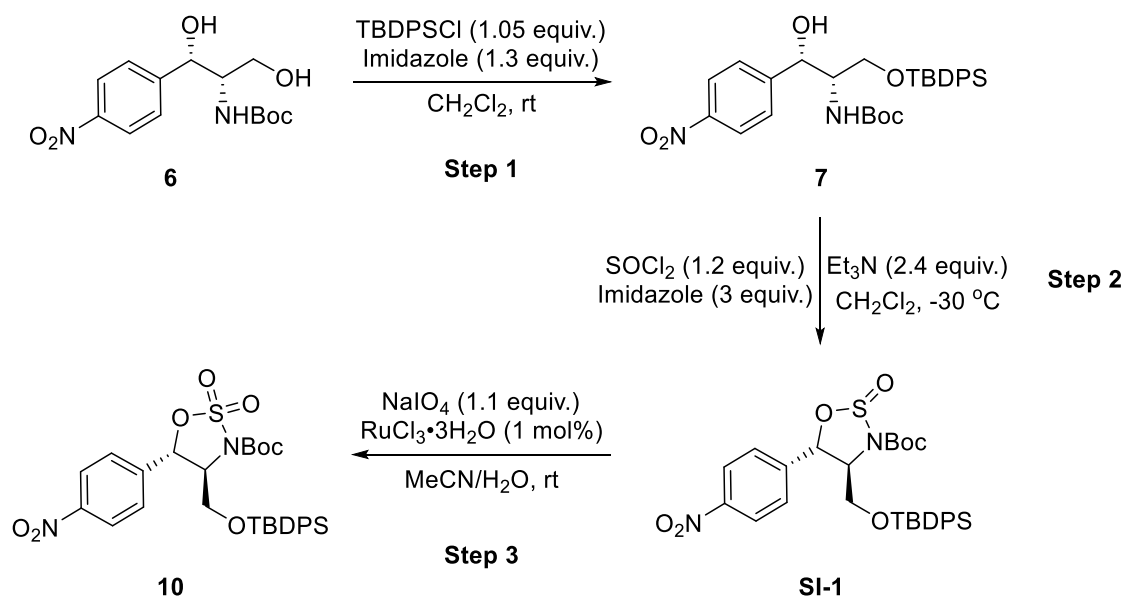

According to a modified literature procedure,<sup>[14]</sup> the cyclic sulfamidate was synthesized from the **6** by a three-step sequence: Silicon-based protection/Cyclization/NaIO<sub>4</sub> oxidation.

Step 1: the corresponding **6** (300 mmol, 1.0 equiv.) and imidazole (330 mmol, 1.3 equiv.) were dissolved in dry CH<sub>2</sub>Cl<sub>2</sub> in a dry round bottom flask. TBDPSCl (315 mmol, 1.05 equiv.) dissolved in dry CH<sub>2</sub>Cl<sub>2</sub> was added dropwise at 0 °C, and then the reaction mixture was allowed to stir at room temperature until TLC indicated completely consumed of the **6**. After completion of the reaction, water was added. The reaction mixture was extracted with CH<sub>2</sub>Cl<sub>2</sub> (3x) and washed with brine (1x). The combined organic layers were dried over Na<sub>2</sub>SO<sub>4</sub>, the solvent was evaporated under vacuum. The crude residue was directly used in the next step without further purification.

Step 2: To the dry three-necked flask, the **7** (1.0 equiv.) and imidazole (3.0 equiv.) were dissolved in dry CH<sub>2</sub>Cl<sub>2</sub> under nitrogen before being cooled to -30 °C. Et<sub>3</sub>N (2.4 equiv.) was added dropwise and the resulting mixture was stirred at -30 °C for 30 min. Then the SOCl<sub>2</sub> was added dropwise and the resulting mixture was stirred at -30 °C for 3 h until TLC indicated completely consumed of the **7**. The reaction was quenched with water. The organic layer was separated and the aqueous layer was extracted with CH<sub>2</sub>Cl<sub>2</sub> (3x). The combined organic layers were dried over Na<sub>2</sub>SO<sub>4</sub>, filtered, and concentrated under vacuum. The crude residue was directly used in the next step without further purification.

Step 3: To the three-necked flask, **SI-1** was dissolved in MeCN and water (1:1), RuCl<sub>3</sub>·3H<sub>2</sub>O (1 mol%) and NaIO<sub>4</sub> (1.1 equiv.) were added sequentially and the resulting mixture was stirred at room temperature for 4 h until TLC indicated completely consumed of the **SI-1**. The MeCN was concentrated under vacuum. Water was added and the reaction mixture was extracted with ethyl acetate (3x). The organic layers were combined and dried over Na<sub>2</sub>SO<sub>4</sub>, filtered, and concentrated under

vacuum. The crude product is recrystallized using MeOH to afford the **10** (159 g, 86% yield in three steps) in a pure form.

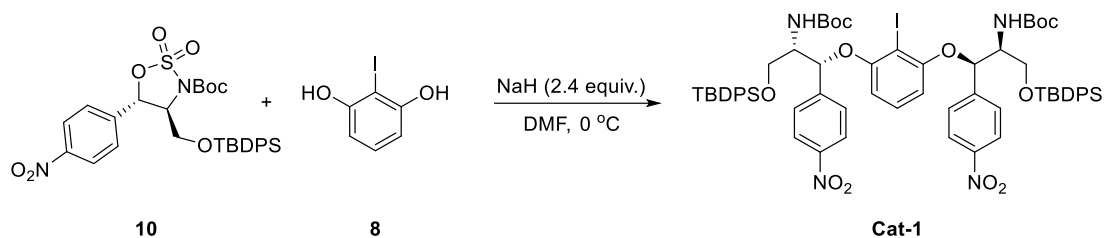

To the dry three-necked flask tube, the **8** (1.0 equiv., 130 mmol, 30.68 g) was dissolved in dry DMF (300 mL) under nitrogen before being cooled to 0 °C. NaH (2.4 equiv., 312 mmol, 12.48 g) was added and the resulting mixture was stirred at 0 °C for 30 min. Then the **10** (2.0 equiv., 260 mmol, 159 g) dissolved in dry DMF (500 mL) was added dropwise and the resulting mixture was stirred at 0 °C for 4 h until TLC indicated completely consumption of the **9**. The reaction was quenched with 1N HCl. Water is further added to the system to precipitate the solids. Crude **Cat-1** (258 g) was isolated by filtration which was directly used in the next step without further purification.

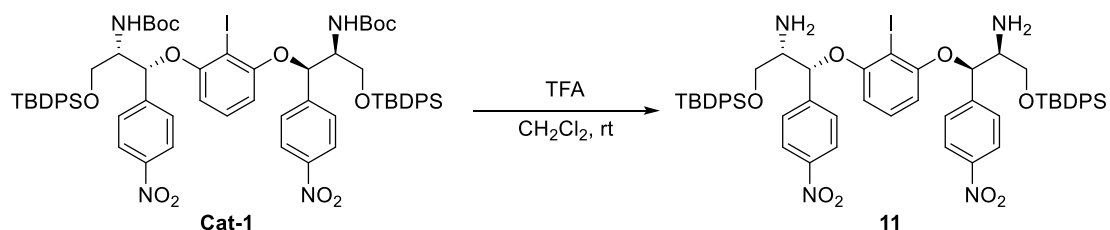

To the dry three-necked flask, the crude **Cat-1** (258 g) was dissolved in dry CH<sub>2</sub>Cl<sub>2</sub> (120 mL). TFA (30 mL) was dropwise at 0 °C and the resulting mixture was stirred at room temperature for 2 h until TLC indicated completely consumed of the **Cat-1**. The reaction was quenched with a saturated solution of NaHCO<sub>3</sub>. The organic layer was separated and the aqueous layer was extracted with CH<sub>2</sub>Cl<sub>2</sub> (3x). The combined organic layers were dried over Na<sub>2</sub>SO<sub>4</sub>, filtered, and concentrated under vacuum. The crude product is recrystallized using MeOH to afford the **11** (106 g, 74% yield in two steps) in a pure form.

#### 4.1.2 General procedure for synthesis of silicon-based catalysts

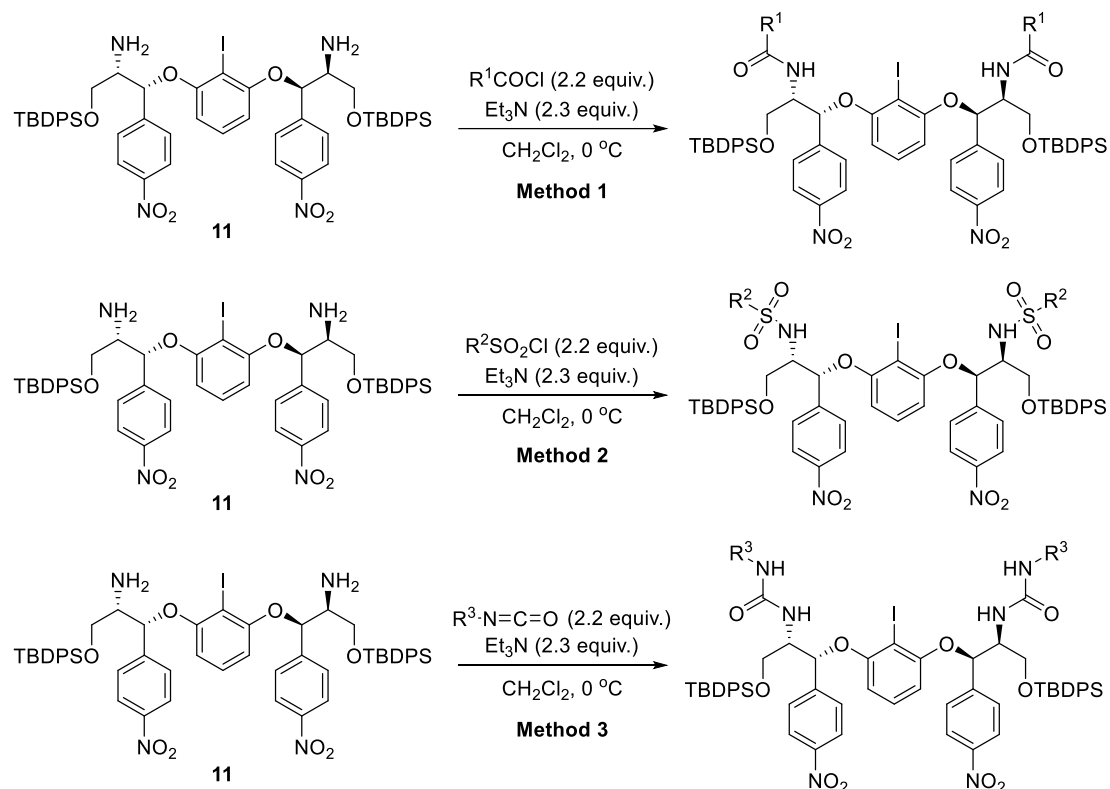

**Method 1:** To the dry three-necked flask, the aryl iodide intermediate **11** and Et<sub>3</sub>N (2.3 equiv.) were dissolved in dry CH<sub>2</sub>Cl<sub>2</sub> under nitrogen before being cooled to 0 °C. R<sup>1</sup>COCl (2.2 equiv.) was added dropwise and the resulting mixture was stirred at 0 °C for 2 h until TLC indicated completely consumed of the aryl iodide. The reaction was quenched with water. The organic layer was separated and the aqueous layer was extracted with CH<sub>2</sub>Cl<sub>2</sub> (3x). The combined organic layers were dried over Na<sub>2</sub>SO<sub>4</sub>, filtered, and concentrated under vacuum. The crude residue was recrystallized using MeOH to afford the corresponding Chiral aryl iodide catalyst in a pure form.

**Method 2:** To the dry three-necked flask, the aryl iodide intermediates **11** and Et<sub>3</sub>N (2.3 equiv.) were dissolved in dry CH<sub>2</sub>Cl<sub>2</sub> under nitrogen before being cooled to 0 °C. R<sup>2</sup>SO<sub>2</sub>Cl (2.2 equiv.) was added dropwise and the resulting mixture was stirred at 0 °C for 2 h until TLC indicated consumption of the aryl iodide. The reaction was quenched with water. The organic layer was separated and the aqueous layer was

extracted with CH<sub>2</sub>Cl<sub>2</sub> (3x). The combined organic layers were dried over Na<sub>2</sub>SO<sub>4</sub>, filtered, and concentrated under vacuum. The crude residue was recrystallized using MeOH to afford the corresponding Chiral aryl iodine catalyst in a pure form.

**Method 3:** To the dry three-necked flask, the aryl iodide intermediates **11** and Et<sub>3</sub>N (2.3 equiv.) were dissolved in dry CH<sub>2</sub>Cl<sub>2</sub> under nitrogen before being cooled to 0 °C. Isocyanates (2.2 equiv.) was added dropwise and the resulting mixture was stirred at 0 °C for 2 h until TLC indicated consumption of the aryl iodide. The reaction was quenched with water. The organic layer was separated and the aqueous layer was extracted with CH<sub>2</sub>Cl<sub>2</sub> (3x). The combined organic layers were dried over Na<sub>2</sub>SO<sub>4</sub>, filtered, and concentrated under vacuum. The crude residue was recrystallized using MeOH to afford the corresponding Chiral aryl iodine catalyst in a pure form.

#### 4.1.3 General procedure for synthesis of ester catalysts

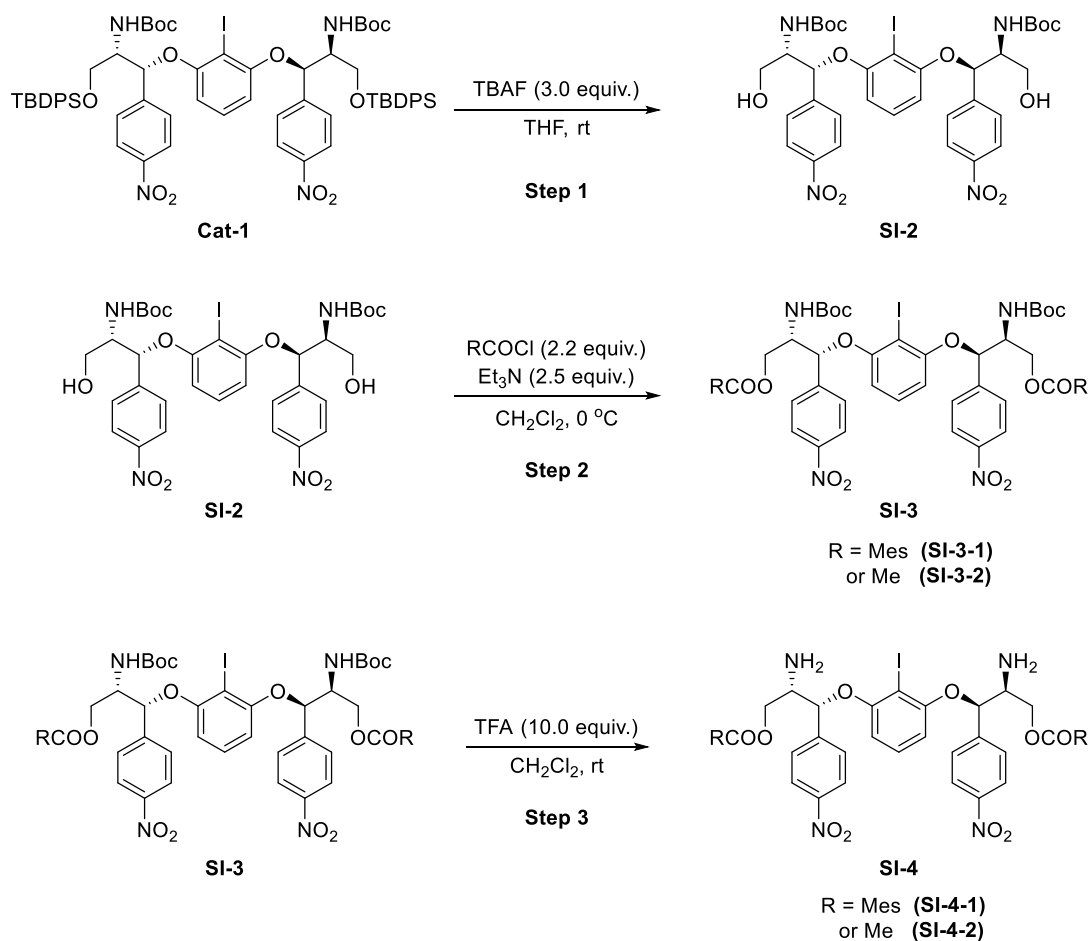

**Step 1:** To a round bottom flask containing the **Cat-1** (1.0 equiv.) and dry THF at room temperature was added TBAF (3.0 equiv.) dropwise. The reaction mixture was stirred for 3 h. The reaction was quenched with water. The organic layer was separated and the aqueous layer was extracted with ethyl acetate (3x). The combined organic layers were dried over Na<sub>2</sub>SO<sub>4</sub>, filtered, and concentrated under vacuum. The crude residue was directly used in the next step without further purification.

**Step 2:** To the dry three-necked flask, the **SI-2** and Et<sub>3</sub>N (2.5 equiv.) were dissolved in dry CH<sub>2</sub>Cl<sub>2</sub> under nitrogen before being cooled to 0 °C. MesCOCl (2.2 equiv.) or AcCl (2.2 equiv.) was added dropwise and the resulting mixture was stirred at 0 °C for 2 h until TLC indicated consumption of the **SI-2**. The reaction was quenched with water. The organic layer was separated and the aqueous layer was extracted with CH<sub>2</sub>Cl<sub>2</sub> (3x). The combined organic layers were dried over Na<sub>2</sub>SO<sub>4</sub>, filtered, and concentrated under vacuum. The crude residue was recrystallized using MeOH to afford the corresponding **SI-3** in a pure form.

**Step 3:** To the dry three-necked flask, the **SI-3** was dissolved in dry CH<sub>2</sub>Cl<sub>2</sub>. TFA was dropwise at 0 °C and the resulting mixture was stirred at room temperature for 2 h until TLC indicated completely consumed of the **SI-3**. The reaction was quenched with a saturated solution of NaHCO<sub>3</sub>. The organic layer was separated and the aqueous layer was extracted with CH<sub>2</sub>Cl<sub>2</sub> (3x). The combined organic layers were dried over Na<sub>2</sub>SO<sub>4</sub>, filtered, and concentrated under vacuum. The residue was recrystallized using MeOH to afford the **SI-4** in a pure form.

The general procedure for synthesis of ester catalysts from **SI-4** is same to synthesis of silicon-based catalysts.

#### 4.1.4 General procedure for synthesis of ether-substituted catalysts

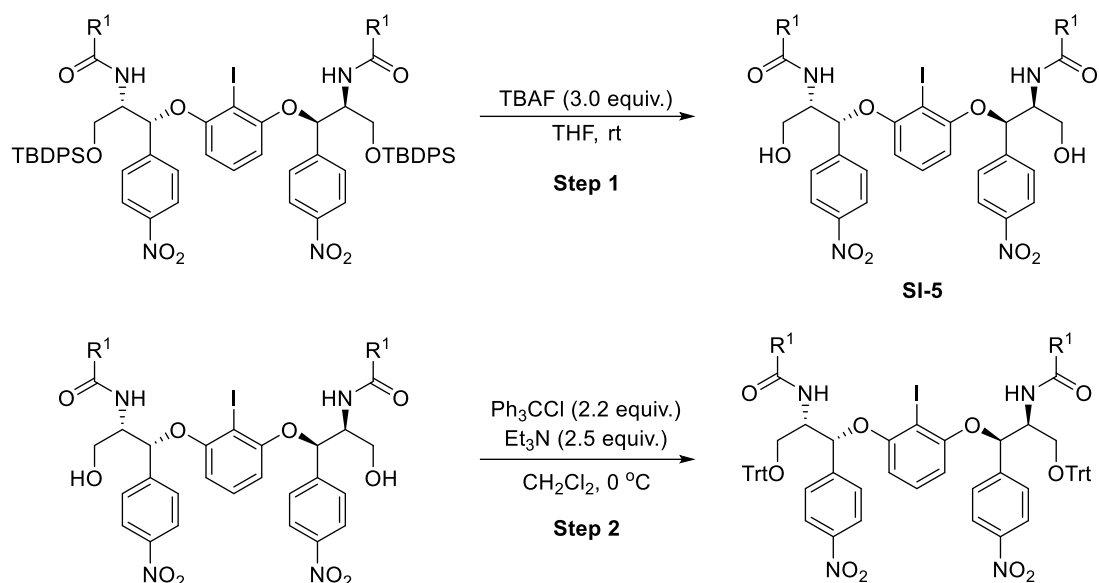

**Step 1:** To a round bottom flask containing corresponding silicon-based catalysts (1.0 equiv.) and dry THF at room temperature was added TBAF (3.0 equiv.) dropwise. The reaction mixture was stirred for 3 h. The reaction was quenched with water. The organic layer was separated and the aqueous layer was extracted with ethyl acetate (3x). The combined organic layers were dried over Na<sub>2</sub>SO<sub>4</sub>, filtered, and concentrated under vacuum. The crude residue was directly used in the next step without further purification.

**Step 2:** To the dry three-necked flask, the **SI-5** and Et<sub>3</sub>N (2.5 equiv.) were dissolved in dry CH<sub>2</sub>Cl<sub>2</sub> under nitrogen before being cooled to 0 °C. Ph<sub>3</sub>CCl (2.2 equiv.) was added dropwise and the resulting mixture was stirred at 0 °C for 2 h until TLC indicated consumption of the **SI-5**. The reaction was quenched with water. The organic layer was separated and the aqueous layer was extracted with CH<sub>2</sub>Cl<sub>2</sub> (3x). The combined organic layers were dried over Na<sub>2</sub>SO<sub>4</sub>, filtered, and concentrated under vacuum. The crude residue was recrystallized using MeOH to afford the corresponding ether catalysts in a pure form.



#### 4.1.5 General procedure for synthesis of 2-iodo-5-substituted catalysts

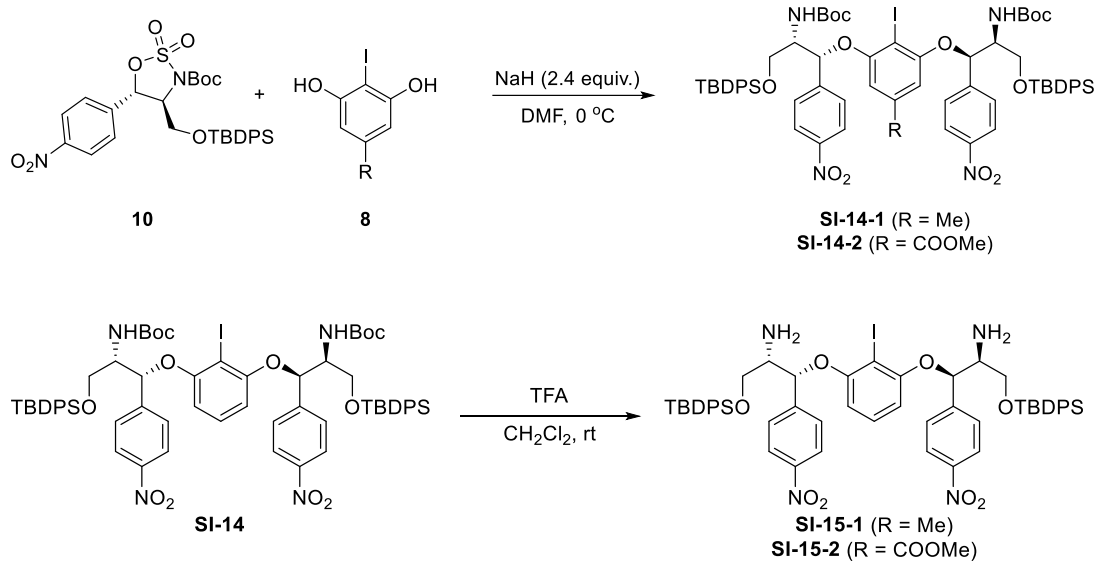

The general procedure was same to the procedure of synthesis of compound **11**.

## 4.2 Hundred grams scale procedure for synthesis of intermediate 11

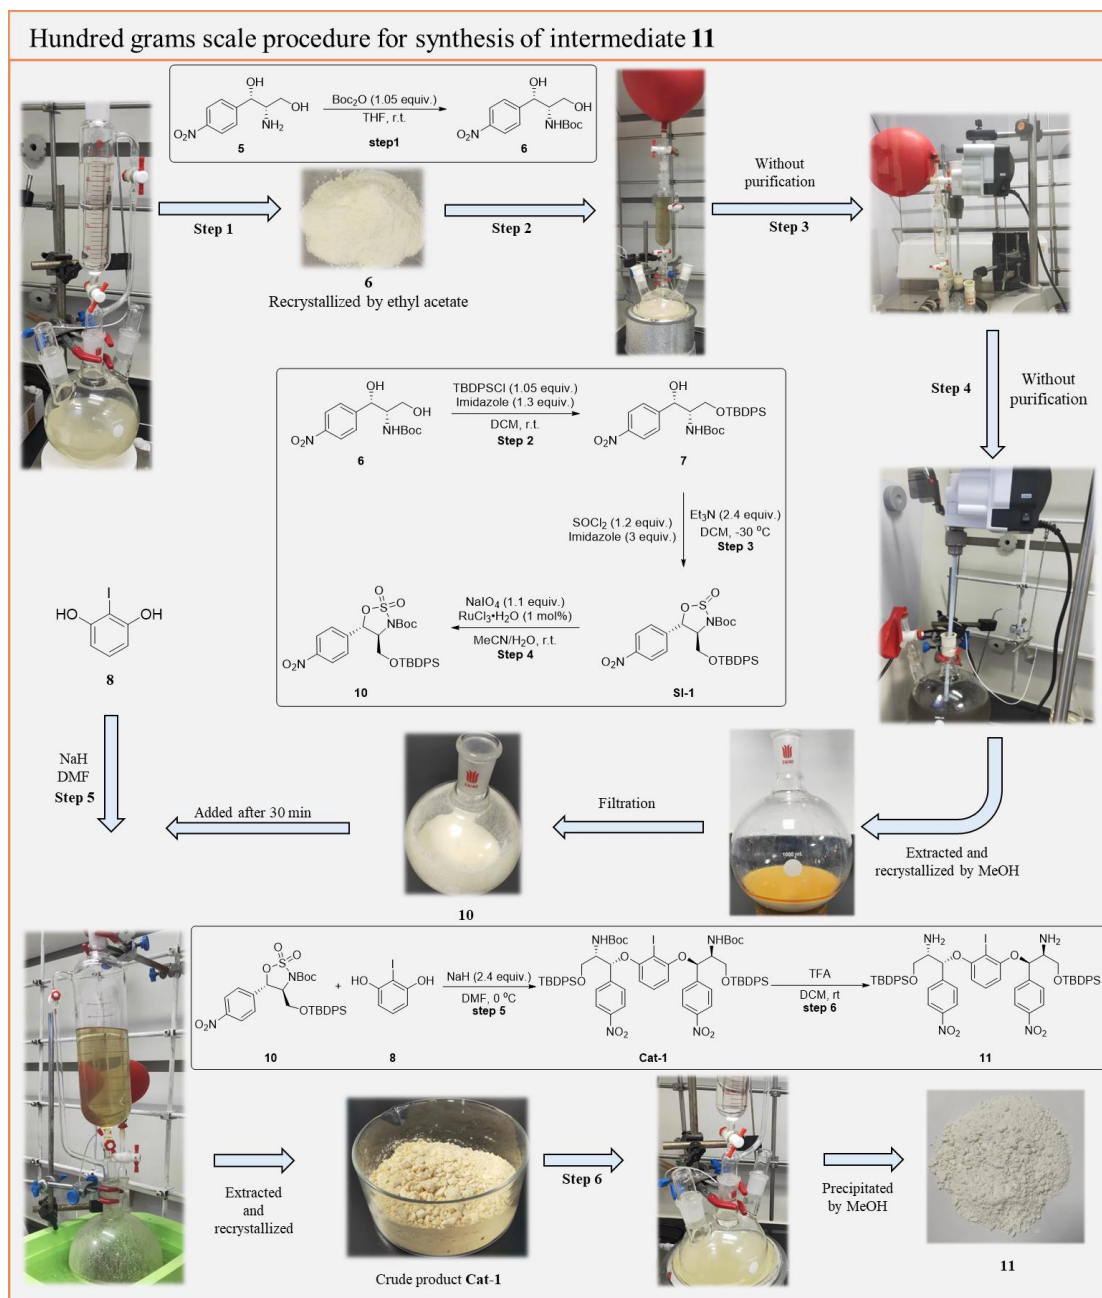

Supplementary Figure 1. Flowchart of hundred grams scale synthesis of intermediate 11

### 4.3 General procedure for synthesis of catalyst starting from *D*-threonine

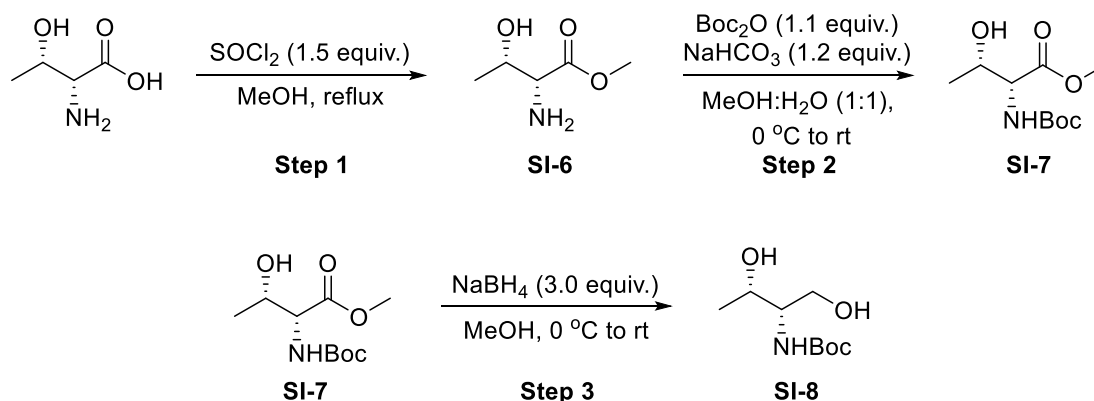

According to a modified literature procedure,<sup>[15]</sup> **SI-4** was synthesized from the *D*-threonine by a three-step sequence: Esterification/Amino protection/ $\text{NaBH}_4$  reduction.

**Step 1:** To a 500-mL round bottom flask containing *D*-threonine (11.9 g, 100 mmol, 1.0 equiv.) and MeOH (200 mL) at 0 °C was added Thionyl chloride (150 mmol, 1.5 equiv.) dropwise. The reaction mixture was allowed to reflux overnight at 80 °C. The organic layers were concentrated under vacuum. The crude residue was directly used in the next step without further purification.

**Step 2:** The **SI-6** (1.0 equiv.) and  $\text{NaHCO}_3$  (120 mmol, 1.2 equiv.) were dissolved in MeOH and water (1:1) before being cooled to 0 °C,  $\text{Boc}_2\text{O}$  (120 mmol, 1.2 equiv.) was added dropwise and the reaction mixture was allowed to stir at ambient temperature until full conversion of the **SI-6**, as shown by TLC. The MeOH was concentrated under vacuum. Water was added and the reaction mixture was extracted with  $\text{CH}_2\text{Cl}_2$  (3x). The organic layers were combined and dried over  $\text{Na}_2\text{SO}_4$ , filtered, and concentrated under vacuum. The crude residue was directly used in the next step without further purification.

**Step 3:** To a 500-mL round bottom flask containing **SI-7** (1.0 equiv.) and MeOH at 0 °C was added  $\text{NaBH}_4$  (300 mmol, 3.0 equiv.) portion wise. The reaction mixture was allowed to stir at 0 °C until TLC indicated full conversion of the **SI-7**. The

MeOH was concentrated under vacuum. Water was added and the reaction mixture was extracted with ethyl acetate (5x). The organic layers were combined and dried over Na<sub>2</sub>SO<sub>4</sub>, filtered, and concentrated under vacuum. The crude residue was subjected to column chromatography on silica gel (PE:EA 1:1) to afford the **SI-8** in a pure form. (15.4 g, 75% yield in three steps).

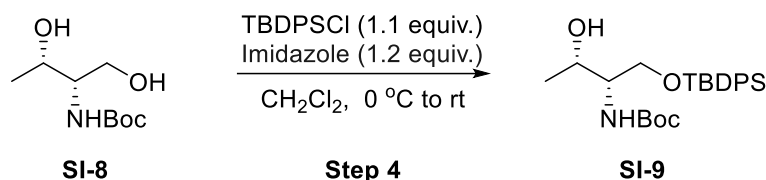

**Step 4:** The corresponding **SI-4** (15.4 g, 75 mmol, 1.0 equiv.) and imidazole (6.12 g, 90 mmol, 1.2 equiv.) were dissolved in dry CH<sub>2</sub>Cl<sub>2</sub> in a dry round bottom flask. TBDPSCI (21.5 mL, 82.5 mmol, 1.1 equiv.) dissolved in dry CH<sub>2</sub>Cl<sub>2</sub> was added dropwise at 0 °C, and then the reaction mixture was allowed to stir at room temperature until TLC indicated full conversion of the **SI-8**. After completion of the reaction, water was added. The reaction mixture was extracted with CH<sub>2</sub>Cl<sub>2</sub> (3x) and washed with brine (1x). The combined organic layers were dried over Na<sub>2</sub>SO<sub>4</sub>, the solvent was evaporated under vacuum. The crude residue was directly used in the next step without further purification.

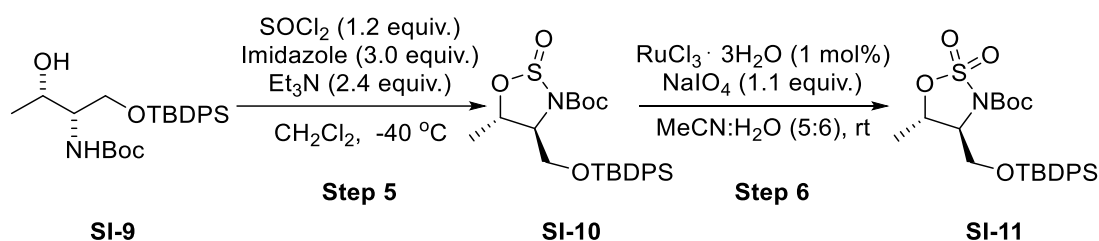

**Step 5:** According to a modified literature procedure,<sup>[1]</sup> to the dry three-necked flask, the **SI-9** (1.0 equiv.) and imidazole (15.3 g, 225 mmol, 3.0 equiv.) were dissolved in dry CH<sub>2</sub>Cl<sub>2</sub> under nitrogen before being cooled to -40 °C. Et<sub>3</sub>N (25 mL, 180 mmol, 2.4 equiv.) was added dropwise and the resulting mixture was stirred at -40 °C for 30 min. Then the SOCl<sub>2</sub> (6.6 mL, 90 mmol, 1.2 equiv.) was added dropwise and the

resulting mixture was stirred at  $-40\text{ }^{\circ}\text{C}$  for 4 h until TLC indicated full conversion of the **SI-9**. The reaction was quenched with water. The organic layer was separated and the aqueous layer was extracted with  $\text{CH}_2\text{Cl}_2$  (3x). The combined organic layers were dried over  $\text{Na}_2\text{SO}_4$ , filtered, and concentrated under vacuum. The crude residue was directly used in the next step without further purification.

**Step 6:** To the three-necked flask, **SI-10** was dissolved in MeCN and water (1:1),  $\text{RuCl}_3 \cdot 3\text{H}_2\text{O}$  (155 mg, 0.75 mmol, 1 mol%) and  $\text{NaIO}_4$  (17.8 g, 82.5 mmol, 1.1 equiv.) were added sequentially and the resulting mixture was stirred at room temperature for 4 h until TLC indicated consumption of the **SI-10**. The MeCN was concentrated under vacuum. Water was added and the reaction mixture was extracted with ethyl acetate (3x). The organic layers were combined and dried over  $\text{Na}_2\text{SO}_4$ , filtered, and concentrated under vacuum. The crude residue was subjected to column chromatography on silica gel (PE:EA 10:1) to afford the **SI-10** in a pure form. (32.19 g, 85% yield)

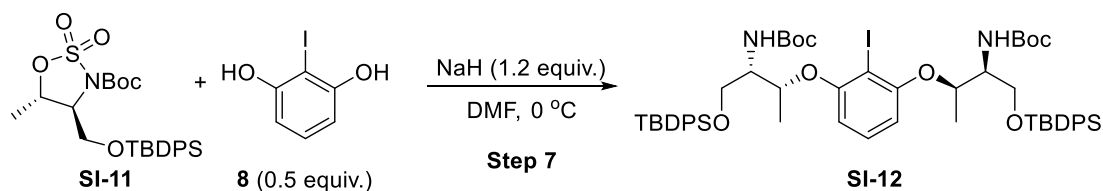

**Step 7:** To the dry three-necked flask, the **8** (2.36 g, 10 mmol, 0.5 equiv.) was dissolved in dry DMF under nitrogen before being cooled to  $0\text{ }^{\circ}\text{C}$ .  $\text{NaH}$  (960 mg, 24 mmol, 1.2 equiv.) was added and the resulting mixture was stirred at  $0\text{ }^{\circ}\text{C}$  for 30 min. Then the **SI-11** (10.1 g, 20 mmol, 1.0 equiv.) dissolved in dry DMF was added dropwise and the resulting mixture was stirred at  $0\text{ }^{\circ}\text{C}$  for 4 h until TLC indicated consumption of the 2-iodobenzene-1,3-diol. The reaction was quenched with 1N HCl. The organic layer was separated and the aqueous layer was extracted with ethyl acetate (3x). The combined organic layers were dried over  $\text{Na}_2\text{SO}_4$ , filtered, and concentrated under vacuum. The crude residue was subjected to column

chromatography on silica gel (PE:EA 6:1) to afford the **SI-12** (8.5 g, 78% yield) in a pure form.

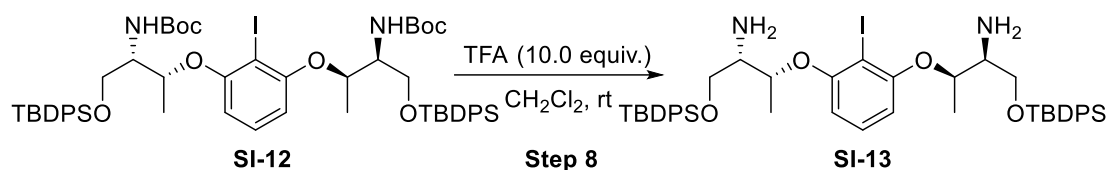

**Step 8:** To the dry three-necked flask, the **SI-12** (8.5 g, 7.8 mmol, 1.0 equiv.) was dissolved in dry  $\text{CH}_2\text{Cl}_2$ . TFA (10.0 equiv.) was added and the resulting mixture was stirred at room temperature for 2 h until TLC indicated consumption of the **SI-12**. The reaction was quenched with a saturated solution of  $\text{NaHCO}_3$ . The organic layer was separated and the aqueous layer was extracted with  $\text{CH}_2\text{Cl}_2$  (3x). The combined organic layers were dried over  $\text{Na}_2\text{SO}_4$ , filtered, and concentrated under vacuum. The crude residue was subjected to column chromatography on silica gel (PE:EA 1:1) to afford the **SI-13** (6.6 g, 95% yield) in a pure form.

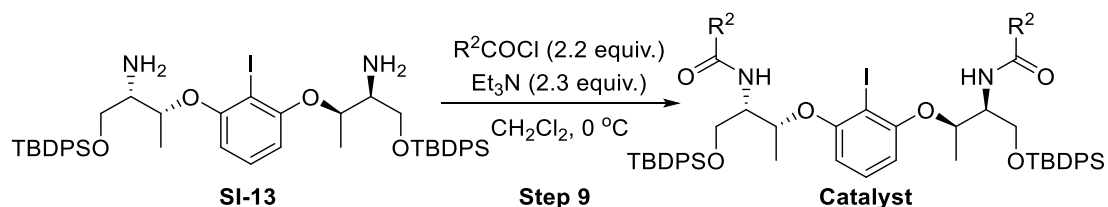

**Step 9:** To the dry three-necked flask, the **SI-13** and  $\text{Et}_3\text{N}$  (2.3 equiv.) were dissolved in dry  $\text{CH}_2\text{Cl}_2$  under nitrogen before being cooled to 0 °C.  $\text{R}^1\text{COCl}$  (2.2 equiv.) was added dropwise and the resulting mixture was stirred at 0 °C for 2 h until TLC indicated consumption of the **SI-13**. The reaction was quenched with water. The organic layer was separated and the aqueous layer was extracted with  $\text{CH}_2\text{Cl}_2$  (3x). The combined organic layers were dried over  $\text{Na}_2\text{SO}_4$ , filtered, and concentrated under vacuum. The crude residue was recrystallized by  $\text{CH}_2\text{Cl}_2$  and hexane to afford the corresponding the **Catalyst** a pure form.

#### 4.4 General procedure for catalyst of the *N*-H bond of the amide moiety changed to *N*-Me bond.

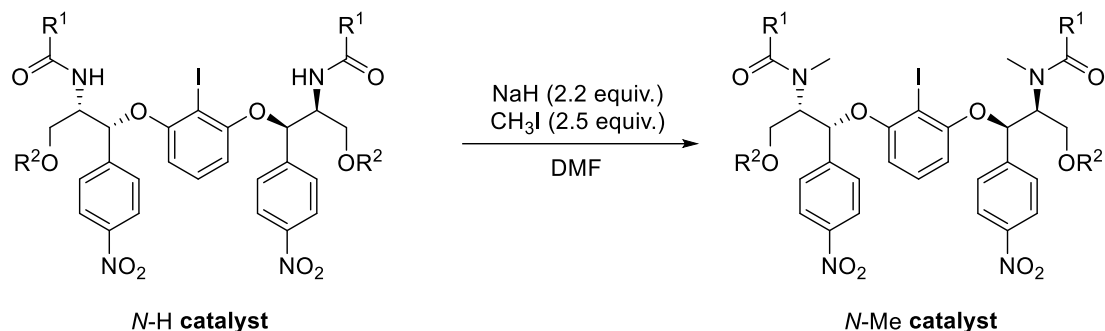

**General procedure:** To the dry three-necked flask tube, the corresponding *N*-H catalyst (1.0 equiv.) was dissolved in dry DMF under nitrogen before being cooled to 0°C. NaH (2.2 equiv.) was added and the resulting mixture was stirred at 0 °C for 30 min. Then the CH<sub>3</sub>I (2.5 equiv.) was added dropwise and the resulting mixture was allowed to stirred at room temperature for 4 h until TLC indicated completely consumption of the starting material. The reaction was quenched with water. The organic layer was separated and the aqueous layer was extracted with ethyl acetate (3x). The combined organic layers were dried over Na<sub>2</sub>SO<sub>4</sub>, filtered, and concentrated under vacuum. The crude residue was subjected to column chromatography on silica gel to afford the *N*-Me catalyst in a pure form.

#### 4.5 Characterization of catalysts and intermediates.

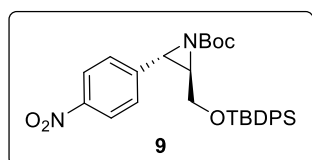

**9** was isolated from Mitsunobu reaction as colorless oil. DIAD (452  $\mu$ L, 2.3 mmol, 2.3 equiv.) was dropwise to **8** (236 mg, 1 mmol, 1 equiv.), **7** (550 mg, 2.2 mmol, 2.2 equiv.) and PPh<sub>3</sub> (707 mg, 2.7 mmol, 2.7 equiv.) in THF at 0 °C. **9** (316 mg, 27% yield) was isolated through chromatography on silica gel eluting with petroleum ether/ethyl acetate (5/1 to 2/1). ( $R_f$  = 0.6, petroleum ether/ethyl acetate = 5/1). <sup>1</sup>H NMR (400 MHz, CDCl<sub>3</sub>) 7.97 (d,  $J$  = 8.9 Hz, 2H), 7.49 – 7.43 (m, 2H), 7.34 – 7.21 (m, 8H), 7.13 (dd,  $J$  = 8.9, 6.0 Hz, 2H), 3.69 – 3.60 (m, 2H), 3.07 (dd,

$J = 11.0, 7.6$  Hz, 1H), 3.03 – 2.96 (m, 1H), 1.38 (s, 9H), 0.87 (s, 9H).  $^{13}\text{C}$  NMR (100 MHz,  $\text{CDCl}_3$ )  $\delta$  161.6, 147.3, 142.2, 135.6, 135.3, 132.8, 132.7, 129.8, 129.8, 128.5, 127.7, 127.6, 123.3, 82.0, 60.9, 45.0, 42.4, 28.0, 27.9, 27.9, 26.7, 19.1. **HRMS** (ESI)  $m/z$  Calcd for  $[\text{C}_{30}\text{H}_{36}\text{N}_2\text{O}_5\text{Si}, \text{M}+\text{Na}]^+$ : 555.2286, found 555.2281.

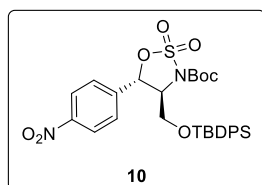

The crude product is recrystallized using MeOH to afford the **10** (159 g, 86% yield in three steps) in a pure form. **MP**: 128.7-130.1 °C.  $^1\text{H}$  NMR (400 MHz,  $\text{CDCl}_3$ )  $\delta$  8.16-8.10 (m, 2H), 7.59 (m, 4H), 7.47-7.29 (m, 8H), 5.76 (d,  $J = 5.7$  Hz, 1H), 4.16

(dd,  $J = 10.3, 5.0$  Hz, 2H), 3.69-3.58 (m, 1H), 1.44 (s, 9H), 1.04 (s, 9H).  $^{13}\text{C}$  NMR (100 MHz,  $\text{CDCl}_3$ )  $\delta$  148.7, 148.2, 141.0, 135.7, 135.6, 132.4, 132.1, 130.4, 130.3, 128.2, 128.1, 128.0, 127.7, 124.3, 86.0, 79.1, 64.6, 59.6, 27.9, 26.8, 19.3. **HRMS** (ESI)  $m/z$  Calcd for  $[\text{C}_{30}\text{H}_{36}\text{N}_2\text{O}_8\text{SSi}, \text{M}+\text{H}]^+$ : 635.1854, found 635.1846.

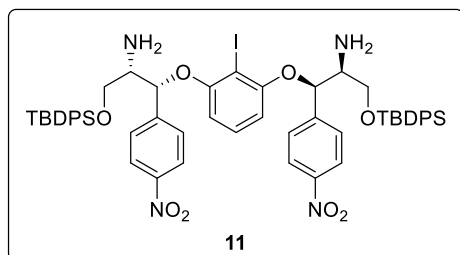

The crude product is recrystallized using MeOH to afford the **11** (106 g, 74% in two steps) in a pure form. **MP**: 206.3-208.7 °C.  $^1\text{H}$  NMR (400 MHz,  $\text{CDCl}_3$ )  $\delta$  8.06 (d,  $J = 8.7$  Hz, 4H), 7.57-7.48 (m, 8H), 7.45-7.39 (m, 4H), 7.35-7.24 (m, 8H), 7.21-7.16 (m, 4H), 6.73 (t,  $J = 8.3$  Hz, 1H),

5.97 (d,  $J = 8.3$  Hz, 2H), 5.31 (d,  $J = 5.8$  Hz, 2H), 3.88 (dd,  $J = 10.2, 6.1$  Hz, 2H), 3.61 (dd,  $J = 10.2, 5.0$  Hz, 2H), 3.37-3.28 (m, 2H), 0.96 (s, 18H).  $^{13}\text{C}$  NMR (100 MHz,  $\text{CDCl}_3$ )  $\delta$  156.9, 147.8, 145.3, 135.7, 135.6, 133.1, 133.1, 130.0, 129.9, 129.7, 128.1, 128.0, 127.9, 123.9, 106.5, 80.9, 79.8, 64.9, 57.8, 27.0, 19.4. **HRMS** (ESI)  $m/z$  Calcd for  $[\text{C}_{56}\text{H}_{61}\text{N}_4\text{O}_8\text{Si}_2, \text{M}+\text{H}]^+$ : 1101.3145, found 1101.3154.

**Optical Rotation:**  $[\alpha]_{\text{D}}^{25}$  8.3 ( $c = 1.0$ ,  $\text{CHCl}_3$ ). >99.9% *ee* (HPLC conditions: Chiralpak OD-H column, *n*-Hexane/*i*-PrOH = 70:30, flow rate = 1.0 mL/min, 30 °C, wavelength = 254 nm,  $t_{\text{R}} = 5.180$  min for major isomer,  $t_{\text{R}} = 8.713$  min for minor isomer).



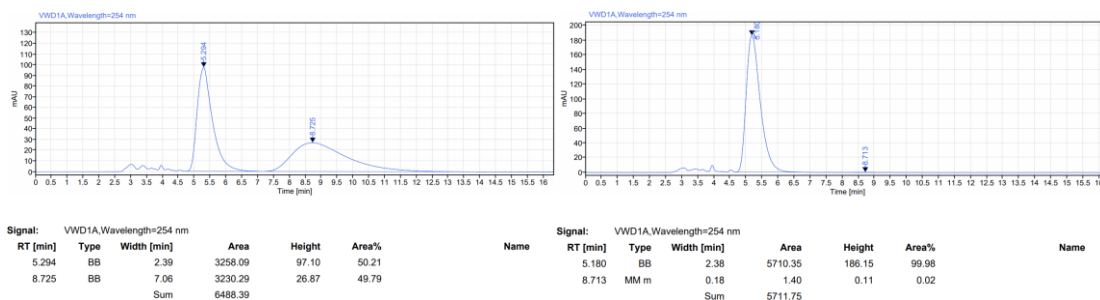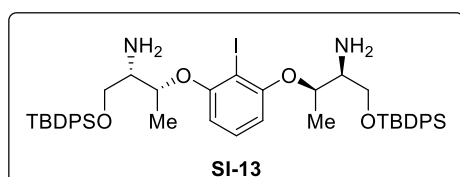

**SI-13** was isolated through chromatography on silica gel eluting with petroleum ether/ethyl acetate (10/1 to 5/1) as colorless oil. ( $R_f = 0.5$ , petroleum ether/ethyl acetate =

5/1).  $^1\text{H NMR}$  (400 MHz,  $\text{CDCl}_3$ )  $\delta$  7.70-7.60 (m, 8H), 7.46-7.29 (m, 12H), 7.15 (t,  $J = 8.3$  Hz, 1H), 6.44 (d,  $J = 8.4$  Hz, 2H), 4.61-4.51 (m, 2H), 3.90-3.77 (m, 4H), 3.26-3.16 (m, 2H), 1.31 (d,  $J = 6.3$  Hz, 6H), 1.06 (s, 18H).  $^{13}\text{C NMR}$  (100 MHz,  $\text{CDCl}_3$ )  $\delta$  157.8, 135.7, 135.7, 133.5, 133.4, 129.9, 129.8, 129.6, 127.9, 127.9, 106.1, 81.8, 76.2, 65.5, 56.7, 27.0, 19.4, 15.2. **HRMS** (ESI)  $m/z$  Calcd for  $[\text{C}_{46}\text{H}_{59}\text{IN}_2\text{O}_4\text{Si}_2, \text{M}+\text{H}]^+$ : 909.2950, found 909.2971.

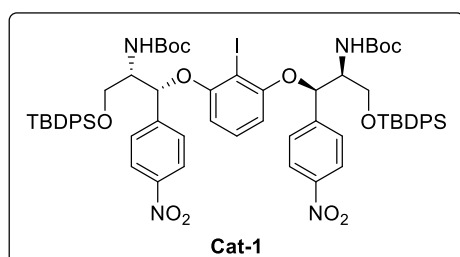

The crude **Cat-1** was purified by MeOH and  $\text{H}_2\text{O}$  as yellow solid. **MP**: 108.0- 111.2°C.  $^1\text{H NMR}$  (400 MHz,  $\text{CDCl}_3$ )  $\delta$  8.15 (d,  $J = 8.2$  Hz, 4H), 7.61-7.47 (m, 12H), 7.36 (dd,  $J = 26.7, 7.3$  Hz, 8H), 7.21 (t,  $J = 7.5$  Hz, 4H), 6.84 (t,  $J = 8.2$

Hz, 1H), 6.05 (d,  $J = 8.3$  Hz, 2H), 5.44 (d,  $J = 6.3$  Hz, 2H), 5.01 (d,  $J = 9.1$  Hz, 2H), 4.30 (dd,  $J = 10.6, 5.1$  Hz, 2H), 4.22-4.17 (m, 2H), 3.89-3.79 (m, 2H), 1.32 (s, 18H), 1.03 (s, 18H).  $^{13}\text{C NMR}$  (100 MHz,  $\text{CDCl}_3$ )  $\delta$  157.1, 155.2, 147.7, 145.3, 135.6, 135.6, 132.9, 132.8, 130.0, 129.9, 129.7, 127.9, 127.9, 127.8, 123.8, 106.5, 79.9, 79.6, 79.5, 62.3, 57.1, 28.3, 27.0, 19.3. **HRMS** (ESI)  $m/z$  Calcd for  $[\text{C}_{66}\text{H}_{77}\text{IN}_4\text{O}_{12}\text{Si}_2, \text{M}+\text{H}]^+$ : 1323.4013, found 1323.4023.

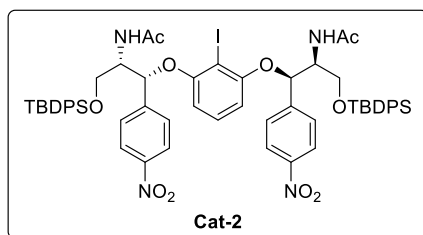

**Cat-2** was prepared using **11** (1.1 g, 1.0 mmol, 1.0 equiv.), Et<sub>3</sub>N (232.3 mg, 2.3 mmol, 2.3 equiv.) and acetyl chloride (173.8 mg, 2.2 mmol, 2.2 equiv.).

The crude residue was purified by MeOH to precipitate the title compound (1.086 g, 0.9 mmol, 90%) as a white solid. **MP**: 188.0-183.2°C. **<sup>1</sup>H NMR** (400 MHz, CDCl<sub>3</sub>) δ 8.04 (d, *J* = 8.6 Hz, 4H), 7.50-7.45 (m, 8H), 7.41 (d, *J* = 8.5 Hz, 4H), 7.34-7.27 (m, 4H), 7.26-7.17 (m, 8H), 6.75 (t, *J* = 8.3 Hz, 1H), 5.95 (d, *J* = 8.4 Hz, 2H), 5.80 (d, *J* = 8.7 Hz, 2H), 5.38 (d, *J* = 5.4 Hz, 2H), 4.45-4.37 (m, 2H), 4.22 (dd, *J* = 11.0, 6.2 Hz, 2H), 3.72 (dd, *J* = 10.9, 3.3 Hz, 2H), 1.76 (s, 6H), 0.94 (s, 18H). **<sup>13</sup>C NMR** (100 MHz, CDCl<sub>3</sub>) δ 169.9, 157.2, 147.7, 144.9, 135.6, 132.9, 132.8, 130.1, 130.0, 130.0, 128.0, 128.0, 127.5, 123.9, 106.8, 79.7, 79.5, 61.8, 56.0, 26.9, 23.3, 19.3. **HRMS** (ESI) *m/z* Calcd for [C<sub>60</sub>H<sub>65</sub>IN<sub>4</sub>O<sub>10</sub>Si<sub>2</sub>, M+H]<sup>+</sup>: 1207.3176, found 1207.3190.

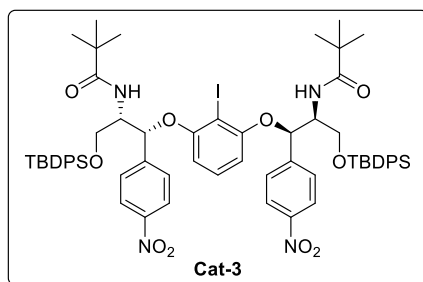

**Cat-3** was prepared using **11** (1.1 g, 1.0 mmol, 1.0 equiv.), Et<sub>3</sub>N (232.3 mg, 2.3 mmol, 2.3 equiv.) and pivaloyl chloride (265.3 mg, 2.2 mmol, 2.2 equiv.).

The crude residue was purified by MeOH and water to precipitate the title compound (1.078 g, 0.85 mmol, 85%) as a white solid. **MP**: 118.1-118.7 °C. **<sup>1</sup>H NMR** (400 MHz, CDCl<sub>3</sub>) δ 8.13 (d, *J* = 8.7 Hz, 4H), 7.57-7.48 (m, 12H), 7.41-7.37 (m, 2H), 7.36-7.28 (m, 6H), 7.25-7.19 (m, 4H), 6.84 (t, *J* = 8.3 Hz, 1H), 6.23 (d, *J* = 8.3 Hz, 2H), 6.06 (d, *J* = 8.4 Hz, 2H), 5.48 (d, *J* = 6.2 Hz, 2H), 4.54-4.45 (m, 2H), 4.35 (dd, *J* = 10.8, 5.4 Hz, 2H), 3.75 (dd, *J* = 10.8, 3.3 Hz, 2H), 1.03 (s, 18H), 1.02 (s, 18H). **<sup>13</sup>C NMR** (100 MHz, CDCl<sub>3</sub>) δ 178.2, 157.5, 147.8, 145.2, 135.6, 135.5, 132.7, 132.6, 130.1, 130.0, 130.0, 128.0, 128.0, 127.7, 123.8, 106.8, 79.5, 61.9, 55.7, 38.8, 27.5, 26.9, 19.3. **HRMS** (ESI) *m/z* Calcd for [C<sub>66</sub>H<sub>77</sub>IN<sub>4</sub>O<sub>10</sub>Si<sub>2</sub>, M+H]<sup>+</sup>: 1269.4296, found 1269.4279.

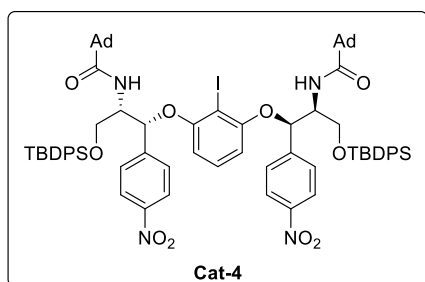

**Cat-4** was prepared using **11** (1.1 g, 1.0 mmol, 1.0 equiv.), Et<sub>3</sub>N (232.3 mg, 2.3 mmol, 2.3 equiv.) and 1-adamantanecarbonyl chloride (437.8 mg, 2.2 mmol, 2.2 equiv.). The crude residue was purified by MeOH to precipitate the title compound (1.331 g, 0.92 mmol, 92%) as a white solid. **MP**: 130.5-133.2 °C. **<sup>1</sup>H NMR** (400 MHz, CDCl<sub>3</sub>) δ 8.14 (d, *J* = 8.7 Hz, 4H), 7.59-7.50 (m, 12H), 7.48-7.27 (m, 8H), 7.26-7.20 (m, 4H), 6.86 (t, *J* = 8.3 Hz, 1H), 6.20 (d, *J* = 8.3 Hz, 2H), 6.07 (d, *J* = 8.4 Hz, 2H), 5.48 (d, *J* = 6.2 Hz, 2H), 4.56-4.46 (m, 2H), 4.38 (dd, *J* = 10.7, 5.4 Hz, 2H), 3.77 (dd, *J* = 10.7, 3.3 Hz, 2H), 1.98 (s, 6H), 1.75-1.57 (m, 24H), 1.03 (s, 18H). **<sup>13</sup>C NMR** (100 MHz, CDCl<sub>3</sub>) δ 177.7, 157.5, 147.7, 145.3, 135.6, 135.5, 132.7, 132.7, 130.1, 130.0, 129.9, 127.9, 127.9, 127.6, 123.7, 106.7, 79.5, 79.4, 62.0, 55.4, 40.6, 39.2, 36.4, 28.0, 26.9, 19.3. **HRMS** (ESI) *m/z* Calcd for [C<sub>78</sub>H<sub>89</sub>IN<sub>4</sub>O<sub>10</sub>Si<sub>2</sub>, M+Na]<sup>+</sup>: 1447.5054, found 1447.5073.

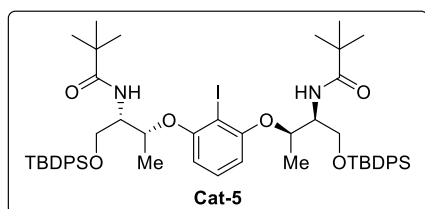

**Cat-5** was prepared using **SI-13** (886 mg, 1.0 mmol, 1.0 equiv.), Et<sub>3</sub>N (232.3 mg, 2.3 mmol, 2.3 equiv.) and pivaloyl chloride (265.3 mg, 2.2 mmol, 2.2 equiv.). The crude residue was purified by DCM and hexane to precipitate the title compound (970 mg, 0.92 mmol, 92%) as a white solid. **MP**: 67.2-67.8 °C. **<sup>1</sup>H NMR** (400 MHz, CDCl<sub>3</sub>) δ 7.68-7.63 (m, 4H), 7.56-7.51 (m, 4H), 7.46-7.41 (m, 2H), 7.41-7.33 (m, 6H), 7.29-7.23 (m, 4H), 7.18 (t, *J* = 8.3 Hz, 1H), 6.46 (d, *J* = 8.4 Hz, 2H), 6.21 (d, *J* = 8.6 Hz, 2H), 4.67 (p, *J* = 6.3 Hz, 2H), 4.38-4.23 (m, 4H), 3.87 (dd, *J* = 10.4, 3.4 Hz, 2H), 1.39 (d, *J* = 6.4 Hz, 6H), 1.17 (s, 18H), 1.04 (s, 18H). **<sup>13</sup>C NMR** (100 MHz, CDCl<sub>3</sub>) δ 178.2, 158.3, 135.6, 135.6, 133.0, 132.7, 130.0, 129.9, 127.9, 127.9, 105.9, 81.1, 74.8, 62.3, 54.6, 38.9, 27.6, 26.9, 19.3, 16.8. **HRMS** (ESI) *m/z* Calcd for [C<sub>66</sub>H<sub>77</sub>IN<sub>4</sub>O<sub>10</sub>Si<sub>2</sub>, M+H]<sup>+</sup>: 1055.4281, found 1055.4306

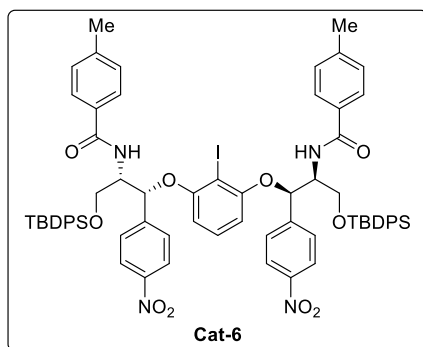

**Cat-6** was prepared using **11** (1.1 g, 1.0 mmol, 1.0 equiv.), Et<sub>3</sub>N (232.3 mg, 2.3 mmol, 2.3 equiv.) and *p*-toluoyl chloride (339 mg, 2.2 mmol, 2.2 equiv.). The crude residue was purified by MeOH to precipitate the title compound (1.096 g, 0.82 mmol, 82%) as a white solid. **MP**: 112.4-114.5 °C. **<sup>1</sup>H NMR** (400 MHz, CDCl<sub>3</sub>) δ 7.98 (d, *J* = 8.4 Hz, 4H), 7.51-7.40 (m, 16H), 7.31-7.24 (m, 4H), 7.21-7.12 (m, 12H), 6.71 (t, *J* = 8.3 Hz, 1H), 6.57 (d, *J* = 8.5 Hz, 2H), 5.94 (d, *J* = 8.4 Hz, 2H), 5.47 (d, *J* = 5.6 Hz, 2H), 4.69-4.59 (m, 2H), 4.34 (dd, *J* = 10.9, 6.1 Hz, 2H), 3.82 (dd, *J* = 10.9, 3.4 Hz, 2H), 2.30 (s, 6H), 0.91 (s, 18H). **<sup>13</sup>C NMR** (100 MHz, CDCl<sub>3</sub>) δ 167.0, 157.2, 147.7, 144.9, 142.5, 135.6, 135.5, 132.8, 132.7, 131.0, 130.0, 130.0, 129.4, 127.9, 127.4, 126.9, 123.9, 106.9, 80.0, 79.6, 61.9, 56.3, 26.9, 21.5, 19.2. **HRMS** (ESI) *m/z* Calcd for [C<sub>72</sub>H<sub>73</sub>IN<sub>4</sub>O<sub>10</sub>Si<sub>2</sub>, M+Na]<sup>+</sup>: 1359.3802, found 1359.3774.

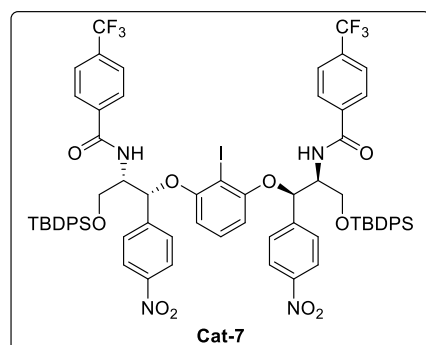

**Cat-7** was prepared using **11** (1.1 g, 1.0 mmol, 1.0 equiv.), Et<sub>3</sub>N (232.3 mg, 2.3 mmol, 2.3 equiv.) and 4-(trifluoromethyl)benzoylchlorid (458.9 mg, 2.2 mmol, 2.2 equiv.). The crude residue was purified by MeOH to precipitate the title compound (1.127 g, 0.78 mmol, 78%) as a white solid. **MP**: 120.3-121.5 °C. **<sup>1</sup>H NMR** (400 MHz, CDCl<sub>3</sub>) δ 8.02 (d, *J* = 8.7 Hz, 4H), 7.65-7.55 (m, 8H), 7.50-7.40 (m, 12H), 7.33-7.25 (m, 4H), 7.22-7.14 (m, 8H), 6.76 (t, *J* = 8.3 Hz, 1H), 6.58 (d, *J* = 8.5 Hz, 2H), 5.97 (d, *J* = 8.4 Hz, 2H), 5.48 (d, *J* = 5.5 Hz, 2H), 4.71-4.60 (m, 2H), 4.36 (dd, *J* = 11.0, 6.2 Hz, 2H), 3.83 (dd, *J* = 11.0, 3.4 Hz, 2H), 0.93 (s, 18H). **<sup>13</sup>C NMR** (100 MHz, CDCl<sub>3</sub>) δ 165.9, 157.2, 147.9, 144.6, 137.1, 135.6, 135.6, 133.6 (q, <sup>2</sup>*J*<sub>C-F</sub> = 32.7 Hz), 132.7, 132.7, 130.2, 130.1, 128.0, 128.0, 127.4, 125.8 (q, <sup>3</sup>*J*<sub>C-F</sub> = 3.7 Hz), 124.0, 123.7 (q, <sup>1</sup>*J*<sub>C-F</sub> = 272.5 Hz), 107.1, 80.0, 79.5, 61.8, 56.5, 26.9, 19.3. **<sup>19</sup>F NMR** (376 MHz, CDCl<sub>3</sub>) δ -62.86. **HRMS** (ESI) *m/z* Calcd for [C<sub>72</sub>H<sub>67</sub>F<sub>6</sub>IN<sub>4</sub>O<sub>10</sub>Si<sub>2</sub>, M+Na]<sup>+</sup>: 1445.3417, found 1445.3431.

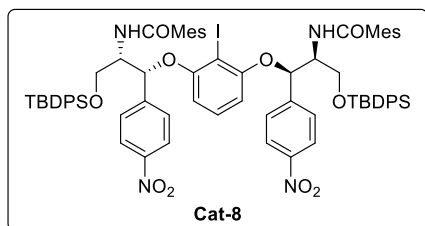

**Cat-8** was prepared using **SI-13** (1.1 g, 1.0 mmol, 1.0 equiv.), Et<sub>3</sub>N (232.3 mg, 2.3 mmol, 2.3 equiv.) and 2,4,6-trimethylbenzoyl chloride (401.6 mg, 2.2 mmol, 2.2 equiv.). The crude residue was

purified by MeOH to precipitate the title compound (1.198 g, 0.86 mmol, 86%) as a white solid. **MP:** 205.0-207.3 °C. **<sup>1</sup>H NMR** (400 MHz, CDCl<sub>3</sub>) δ 8.09 (d, *J* = 8.8 Hz, 4H), 7.53-7.40 (m, 12H), 7.30-7.24 (m, 4H), 7.18-7.11 (m, 8H), 6.78 (t, *J* = 8.3 Hz, 1H), 6.73 (s, 4H), 6.02 (dd, *J* = 8.2, 2.3 Hz, 4H), 5.69 (d, *J* = 4.9 Hz, 2H), 4.71-4.59 (m, 2H), 4.30 (dd, *J* = 11.2, 6.8 Hz, 2H), 3.81 (dd, *J* = 11.1, 3.1 Hz, 2H), 2.22 (s, 6H), 1.88 (s, 12H), 0.94 (s, 18H). **<sup>13</sup>C NMR** (100 MHz, CDCl<sub>3</sub>) δ 170.7, 157.1, 147.9, 144.7, 138.9, 135.5, 134.2, 134.2, 132.7, 132.5, 130.1, 130.0, 129.9, 128.3, 127.9, 127.7, 124.0, 106.5, 79.5, 79.3, 61.7, 57.0, 26.9, 21.1, 19.2, 18.9. **HRMS** (ESI) *m/z* Calcd for [C<sub>76</sub>H<sub>81</sub>IN<sub>4</sub>O<sub>10</sub>Si<sub>2</sub>, M+Na]<sup>+</sup>: 1415.4428, found 1415.4434.

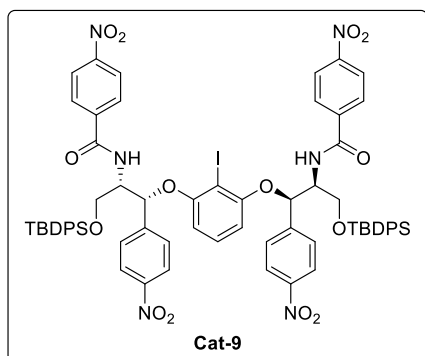

**Cat-9** was prepared using **11** (1.1 g, 1.0 mmol, 1.0 equiv.), Et<sub>3</sub>N (232.3 mg, 2.3 mmol, 2.3 equiv.) and 4-nitrobenzoyl chloride (408.2 mg, 2.2 mmol, 2.2 equiv.). The crude residue was purified by MeOH to precipitate the title compound (1.3 g, 0.93 mmol, 93%) as a white solid. **MP:** 130.5-132.7 °C. **<sup>1</sup>H NMR** (400 MHz, CDCl<sub>3</sub>) δ 8.16 (d, *J* = 8.5 Hz,

4H), 8.03 (d, *J* = 8.4 Hz, 4H), 7.64 (d, *J* = 8.6 Hz, 4H), 7.50-7.41 (m, 12H), 7.34-7.27 (m, 4H), 7.23-7.15 (m, 8H), 6.77 (t, *J* = 8.3 Hz, 1H), 6.60 (d, *J* = 8.5 Hz, 2H), 5.98 (d, *J* = 8.4 Hz, 2H), 5.49 (d, *J* = 5.5 Hz, 2H), 4.65 (dtd, *J* = 9.2, 5.9, 3.4 Hz, 2H), 4.37 (dd, *J* = 11.0, 6.3 Hz, 2H), 3.84 (dd, *J* = 11.1, 3.4 Hz, 2H), 0.92 (s, 18H). **<sup>13</sup>C NMR** (100 MHz, CDCl<sub>3</sub>) δ 165.2, 157.2, 149.8, 147.9, 144.4, 139.3, 135.6, 135.6, 132.6, 130.2, 130.1, 128.1, 128.1, 128.0, 127.4, 124.0, 123.9, 107.1, 79.9, 79.4, 61.7, 56.6, 26.9, 19.3. **HRMS** (ESI) *m/z* Calcd for [C<sub>70</sub>H<sub>67</sub>IN<sub>6</sub>O<sub>14</sub>Si<sub>2</sub>, M+Na]<sup>+</sup>: 1421.3191, found 1421.3219.

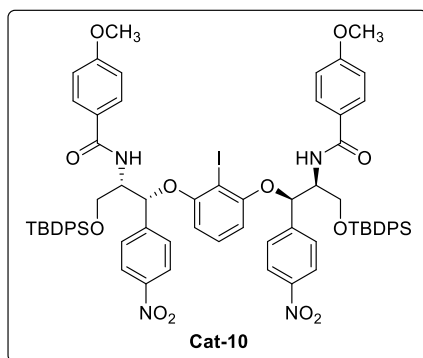

**Cat-10** was prepared using **11** (1.1 g, 1.0 mmol, 1.0 equiv.), Et<sub>3</sub>N (232.3 mg, 2.3 mmol, 2.3 equiv.) and 4-methoxybenzoyl chloride (375.3 mg, 2.2 mmol, 2.2 equiv.). The crude residue was purified by MeOH to precipitate the title compound (1.232 g, 0.90 mmol, 90%) as a white solid. **MP**: 80.1-

81.6 °C. **<sup>1</sup>H NMR** (400 MHz, CDCl<sub>3</sub>) δ 8.10 (d, *J* = 8.3 Hz, 4H), 7.61 (d, *J* = 8.4 Hz, 4H), 7.58-7.50 (m, 12H), 7.42-7.35 (m, 4H), 7.31-7.24 (m, 8H), 6.93 (d, *J* = 8.3 Hz, 4H), 6.80 (t, *J* = 8.3 Hz, 1H), 6.56 (d, *J* = 8.2 Hz, 2H), 6.02 (d, *J* = 8.3 Hz, 2H), 5.55 (d, *J* = 5.2 Hz, 2H), 4.76-4.66 (m, 2H), 4.42 (dd, *J* = 10.8, 6.0 Hz, 2H), 3.93-3.88 (m, 2H), 3.88 (s, 6H), 1.01 (s, 18H). **<sup>13</sup>C NMR** (100 MHz, CDCl<sub>3</sub>) δ 166.7, 162.6, 157.3, 147.7, 145.0, 135.7, 135.6, 132.9, 132.8, 130.1, 130.0, 128.8, 128.0, 127.4, 126.1, 124.0, 114.0, 107.0, 80.2, 79.6, 61.9, 56.4, 55.6, 26.9, 19.3. **HRMS** (ESI) *m/z* Calcd for [C<sub>72</sub>H<sub>73</sub>IN<sub>4</sub>O<sub>12</sub>Si<sub>2</sub>, M+Na]<sup>+</sup>: 1421.3191, found 1421.3219.

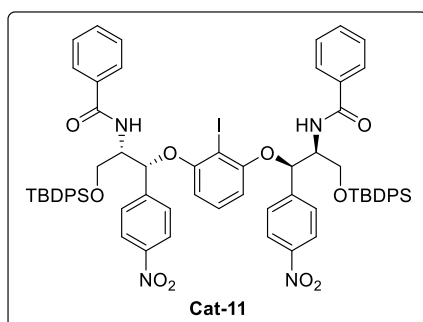

**Cat-11** was prepared using **11** (1.1 g, 1.0 mmol, 1.0 equiv.), Et<sub>3</sub>N (232.3 mg, 2.3 mmol, 2.3 equiv.) and benzoyl chloride (309.3 mg, 2.2 mmol, 2.2 equiv.). The crude residue was purified by MeOH to precipitate the title compound (1.138 g, 0.87 mmol, 87%) as a white solid. **MP**: 161.3-162.5 °C.

**<sup>1</sup>H NMR** (400 MHz, CDCl<sub>3</sub>) δ 8.01 (d, *J* = 8.8 Hz, 4H), 7.56-7.52 (m, 4H), 7.49-7.41 (m, 14H), 7.38-7.33 (m, 4H), 7.32-7.25 (m, 4H), 7.22-7.14 (m, 8H), 6.73 (t, *J* = 8.3 Hz, 1H), 6.55 (d, *J* = 8.5 Hz, 2H), 5.94 (d, *J* = 8.4 Hz, 2H), 5.47 (d, *J* = 5.5 Hz, 2H), 4.68-4.60 (m, 2H), 4.34 (dd, *J* = 10.9, 6.1 Hz, 2H), 3.81 (dd, *J* = 10.9, 3.4 Hz, 2H), 0.92 (s, 18H). **<sup>13</sup>C NMR** (100 MHz, CDCl<sub>3</sub>) δ 167.2, 157.3, 147.8, 144.9, 135.7, 135.6, 133.9, 132.8, 132.8, 132.0, 130.1, 130.1, 128.8, 128.0, 127.4, 127.0, 124.0, 107.0, 80.0, 79.6, 61.9, 56.4, 26.9, 19.3. **HRMS** (ESI) *m/z* Calcd for [C<sub>70</sub>H<sub>69</sub>IN<sub>4</sub>O<sub>10</sub>Si<sub>2</sub>, M+H]<sup>+</sup>: 1309.3670, found 1309.3664.

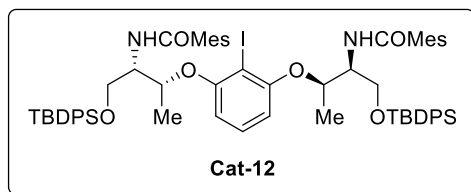

**Cat-12** was prepared using **SI-13** (1.1 g, 1.0 mmol, 1.0 equiv.), Et<sub>3</sub>N (232.3 mg, 2.3 mmol, 2.3 equiv.) and 2,4,6-trimethylbenzoyl chloride (401.6 mg, 2.2 mmol, 2.2 equiv.). The crude

residue was purified by CH<sub>2</sub>Cl<sub>2</sub> and hexane to precipitate the title compound (1.138 g, 0.87 mmol, 87%) as a white solid. **MP**: 223.5-224.7 °C. **<sup>1</sup>H NMR** (400 MHz, CDCl<sub>3</sub>) δ 7.67 (d, *J* = 7.2 Hz, 4H), 7.58 (d, *J* = 7.3 Hz, 4H), 7.44 (t, *J* = 7.3 Hz, 2H), 7.36 (t, *J* = 7.4 Hz, 6H), 7.31-7.24 (m, 4H), 7.20 (t, *J* = 8.3 Hz, 1H), 6.85 (s, 4H), 6.47 (d, *J* = 8.4 Hz, 2H), 6.05 (d, *J* = 8.6 Hz, 2H), 4.84 (p, *J* = 6.1 Hz, 2H), 4.56 (m, 2H), 4.32 (dd, *J* = 10.8, 5.6 Hz, 2H), 4.06 (dd, *J* = 10.9, 3.6 Hz, 2H), 2.31 (s, 6H), 2.20 (s, 12H), 1.47 (d, *J* = 6.3 Hz, 6H), 1.06 (s, 18H). **<sup>13</sup>C NMR** (100 MHz, CDCl<sub>3</sub>) δ 170.6, 157.7, 138.6, 135.7, 135.6, 134.8, 134.2, 133.1, 132.8, 130.0, 129.9, 129.9, 128.4, 127.9, 127.9, 105.7, 74.3, 62.5, 55.6, 27.0, 21.2, 19.3, 19.2, 16.7. **HRMS** (ESI) *m/z* Calcd for [C<sub>66</sub>H<sub>79</sub>IN<sub>2</sub>O<sub>6</sub>Si<sub>2</sub>, M+H]<sup>+</sup>: 1179.4600, found 1179.4610.

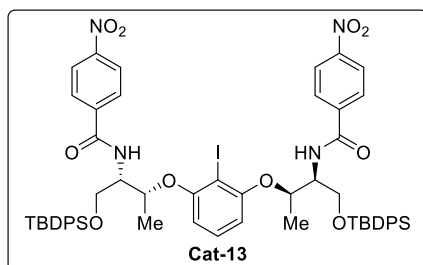

**Cat-13** was prepared using **SI-13** (1.1 g, 1.0 mmol, 1.0 equiv.), Et<sub>3</sub>N (232.3 mg, 2.3 mmol, 2.3 equiv.) and 4-nitrobenzoyl chloride (408.2 mg, 2.2 mmol, 2.2 equiv.). The crude residue was purified by DCM and hexane to precipitate the title compound

(1.1 g, 0.93 mmol, 93%) as a white solid. **MP**: 107.4-109.8 °C. **<sup>1</sup>H NMR** (400 MHz, CDCl<sub>3</sub>) δ 8.25 (d, *J* = 8.6 Hz, 4H), 7.78 (d, *J* = 8.8 Hz, 4H), 7.66-7.53 (m, 8H), 7.48-7.32 (m, 8H), 7.30-7.24 (m, 4H), 7.17 (t, *J* = 8.3 Hz, 1H), 6.63-6.53 (m, 2H), 6.46 (d, *J* = 8.5 Hz, 2H), 4.77-4.69 (m, 2H), 4.59-4.49 (m, 2H), 4.38-4.27 (m, 2H), 4.14-4.04 (m, 2H), 1.44 (d, *J* = 6.6 Hz, 6H), 1.03 (s, 18H). **<sup>13</sup>C NMR** (100 MHz, CDCl<sub>3</sub>) δ 165.2, 158.1, 149.7, 140.0, 135.7, 135.7, 133.1, 132.8, 130.2, 130.1, 128.3, 128.1, 128.0, 123.9, 106.3, 81.2, 75.4, 62.2, 55.7, 27.0, 19.4, 16.9. **HRMS** (ESI) *m/z* Calcd for [C<sub>60</sub>H<sub>65</sub>IN<sub>4</sub>O<sub>10</sub>Si<sub>2</sub>, M+Na]<sup>+</sup>: 1207.3176, found 1207.3190.

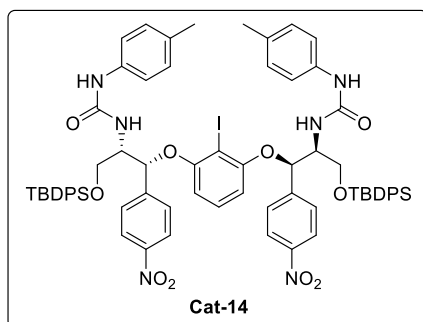

**Cat-14** was prepared using **11** (1.1 g, 1.0 mmol, 1.0 equiv.), Et<sub>3</sub>N (232.3 mg, 2.3 mmol, 2.3 equiv.) and *p*-Tolyl isocyanate (292.3 mg, 2.2 mmol, 2.2 equiv.). The crude residue was purified by MeOH to precipitate the title compound (1.161 g, 0.85 mmol, 85%) as a white solid. **MP**: 181.1-182.3 °C.

**<sup>1</sup>H NMR** (400 MHz, CDCl<sub>3</sub>) δ 7.99 (d, *J* = 8.4 Hz, 4H), 7.43 – 7.37 (m, 8H), 7.34 (d, *J* = 7.4 Hz, 4H), 7.30 – 7.26 (m, 2H), 7.20 – 7.15 (m, 6H), 7.08 – 7.00 (m, 8H), 6.93 (d, 4H), 6.70 (t, *J* = 8.3 Hz, 1H), 6.52 (s, 2H), 5.92 (d, *J* = 8.4 Hz, 2H), 5.36 (d, *J* = 6.4 Hz, 2H), 5.27 (d, *J* = 8.5 Hz, 2H), 4.39 – 4.31 (m, 2H), 4.22 (dd, *J* = 10.7, 5.0 Hz, 2H), 3.68 (dd, *J* = 10.8, 3.2 Hz, 2H), 2.22 (s, 6H), 0.82 (s, 18H). **<sup>13</sup>C NMR** (100 MHz, CDCl<sub>3</sub>) δ 157.1, 155.7, 147.7, 145.4, 135.5, 135.5, 135.2, 134.9, 132.7, 132.6, 130.3, 130.0, 129.8, 127.9, 127.9, 127.8, 123.8, 123.3, 106.5, 79.3, 79.3, 62.3, 56.6, 26.8, 21.0, 19.2. **HRMS** (ESI) *m/z* Calcd for [C<sub>72</sub>H<sub>75</sub>IN<sub>6</sub>O<sub>10</sub>Si<sub>2</sub>, M+H]<sup>+</sup>: 1367.4201, found 1367.4210.

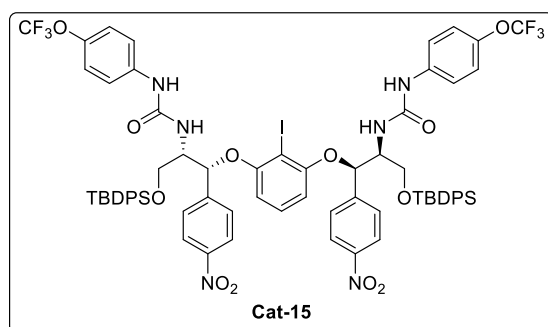

**Cat-15** was prepared using **11** (1.1 g, 1.0 mmol, 1.0 equiv.), Et<sub>3</sub>N (232.3 mg, 2.3 mmol, 2.3 equiv.) and 4-(trifluoromethoxy)phenyl isocyanate (446.6 mg, 2.2 mmol, 2.2 equiv.). The crude residue was purified by MeOH

and water to precipitate the title compound (1.161 g, 0.87 mmol, 87%) as a white solid. **MP**: 136.0-138.4 °C. **<sup>1</sup>H NMR** (400 MHz, CDCl<sub>3</sub>) δ 8.06 (d, *J* = 8.8 Hz, 4H), 7.58-7.53 (m, 8H), 7.48 (d, *J* = 8.9 Hz, 4H), 7.43-7.30 (m, 8H), 7.29-7.23 (m, 4H), 7.20-7.08 (m, 8H), 6.84 (t, *J* = 8.3 Hz, 1H), 6.53 (s, 2H), 6.05 (d, *J* = 8.4 Hz, 2H), 5.54 (d, *J* = 5.4 Hz, 2H), 5.19 (d, *J* = 8.0 Hz, 2H), 4.46-4.33 (m, 4H), 3.86 (dd, *J* = 10.6, 3.3 Hz, 2H), 0.99 (s, 18H). **<sup>13</sup>C NMR** (100 MHz, CDCl<sub>3</sub>) δ 157.1, 154.9, 147.7, 145.3, 145.0, 136.8, 135.6, 135.6, 132.9, 132.9, 130.2, 130.1, 128.0, 128.0, 127.6, 123.9, 122.2, 122.0, 120.5 (d, <sup>1</sup>*J*<sub>C-F</sub> = 257.2 Hz), 106.8, 79.9, 79.3, 62.2, 57.1, 26.9,



19.3, 19.3. **<sup>19</sup>F NMR** (376 MHz, CDCl<sub>3</sub>) δ -58.09. **HRMS** (ESI) m/z Calcd for [C<sub>72</sub>H<sub>69</sub>F<sub>6</sub>IN<sub>6</sub>O<sub>12</sub>Si<sub>2</sub>, M+H]<sup>+</sup>: 1529.3353, found 1529.3379.

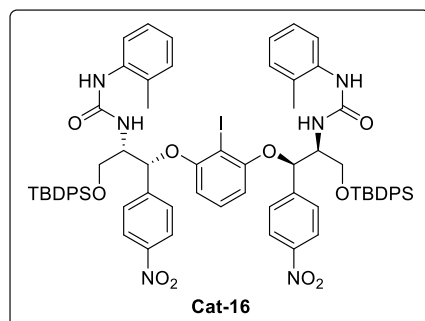

**Cat-16** was prepared using **11** (1.1 g, 1.0 mmol, 1.0 equiv.), Et<sub>3</sub>N (232.3 mg, 2.3 mmol, 2.3 equiv.) and *o*-Tolyl isocyanate (292.3 mg, 2.2 mmol, 2.2 equiv.). The crude residue was purified by MeOH to precipitate the title compound (1.190 g, 0.87 mmol, 87%) as a white solid. **MP**: 137.0-140.4 °C.

**<sup>1</sup>H NMR** (400 MHz, CDCl<sub>3</sub>) δ 8.19 (d, *J* = 8.6 Hz, 4H), 7.59-7.48 (m, 8H), 7.45-7.38 (m, 6H), 7.37-7.29 (m, 8H), 7.29-7.23 (m, 4H), 7.22-7.10 (m, 6H), 6.84 (t, *J* = 8.3 Hz, 1H), 6.59 (s, 2H), 6.06 (d, *J* = 8.4 Hz, 2H), 5.46 (d, *J* = 6.9 Hz, 2H), 5.26 (d, *J* = 8.6 Hz, 2H), 4.58-4.46 (m, 2H), 4.31 (dd, *J* = 10.6, 4.6 Hz, 2H), 3.79 (dd, *J* = 10.7, 3.2 Hz, 2H), 2.18 (s, 6H), 0.94 (s, 18H). **<sup>13</sup>C NMR** (100 MHz, CDCl<sub>3</sub>) δ 157.0, 156.0, 147.8, 145.5, 135.5, 135.4, 134.3, 132.6, 132.5, 131.5, 130.0, 129.8, 129.8, 127.9, 127.9, 127.8, 127.5, 127.2, 126.8, 123.7, 106.4, 79.3, 79.1, 62.2, 56.4, 26.8, 19.2, 18.0. **HRMS** (ESI) m/z Calcd for [C<sub>72</sub>H<sub>75</sub>IN<sub>6</sub>O<sub>10</sub>Si<sub>2</sub>, M+H]<sup>+</sup>: 1367.4201, found 1367.4200.

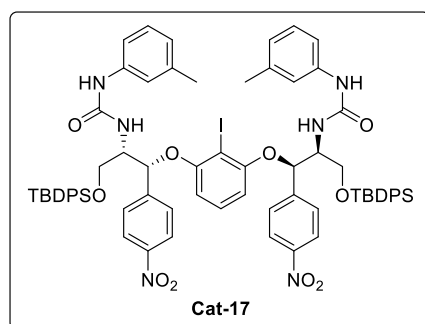

**Cat-17** was prepared using **11** (1.1 g, 1.0 mmol, 1.0 equiv.), Et<sub>3</sub>N (232.3 mg, 2.3 mmol, 2.3 equiv.) and *m*-Tolyl isocyanate (292.3 mg, 2.2 mmol, 2.2 equiv.). The crude residue was purified by MeOH to precipitate the title compound (1.152 g, 0.83 mmol, 83%) as a white solid. **MP**: 139.0-142.8 °C.

**<sup>1</sup>H NMR** (400 MHz, CDCl<sub>3</sub>) δ 8.06 (d, *J* = 8.4 Hz, 4H), 7.56-7.47 (m, 12H), 7.40-7.35 (m, 2H), 7.35-7.26 (m, 6H), 7.23-7.15 (m, 6H), 7.00 (s, 2H), 6.95 (m, 4H), 6.82 (t, *J* = 8.3 Hz, 1H), 6.78 (s, 2H), 6.05 (d, *J* = 8.5 Hz, 2H), 5.53 (d, *J* = 6.0 Hz, 2H), 5.48 (d, *J* = 8.4 Hz, 2H), 4.53-4.45 (m, 2H), 4.35 (dd, *J* = 10.8, 5.4 Hz, 2H), 3.84 (dd, *J* = 10.9, 3.3 Hz, 2H), 2.30 (s, 6H), 0.96 (s, 18H). **<sup>13</sup>C NMR** (100 MHz, CDCl<sub>3</sub>) δ 157.1, 155.5, 147.6, 145.3, 139.6, 137.7, 135.5, 135.5, 132.8, 132.7, 130.0, 129.9,

129.4, 127.9, 127.9, 127.7, 125.7, 123.8, 123.0, 119.3, 106.5, 79.5, 79.2, 62.2, 56.7, 26.8, 21.5, 19.2. **HRMS** (ESI)  $m/z$  Calcd for  $[C_{72}H_{75}IN_6O_{10}Si_2, M+Na]^+$ : 1389.4020, found 1389.4021.

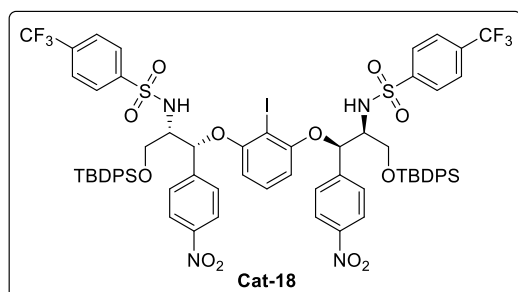

**Cat-18** was prepared using **11** (1.1 g, 1.0 mmol, 1.0 equiv.),  $Et_3N$  (232.3 mg, 2.3 mmol, 2.3 equiv.) and (Trifluoromethyl)benzene-1-sulfonylchloride (539 mg, 2.2 mmol, 2.2 equiv.). The crude residue was purified by

MeOH to precipitate the title compound (1.322 g, 0.86 mmol, 86%) as a white solid.

**MP:** 116.3-119.7 °C.  **$^1H$  NMR** (400 MHz,  $CDCl_3$ )  $\delta$  8.10 (d,  $J = 8.3$  Hz, 4H), 7.77 (d,  $J = 8.1$  Hz, 4H), 7.51 (d,  $J = 8.2$  Hz, 4H), 7.46-7.37 (m, 14H), 7.33-7.23 (m, 6H), 7.16 (t,  $J = 7.5$  Hz, 4H), 6.81 (t,  $J = 8.3$  Hz, 1H), 5.99 (d,  $J = 8.4$  Hz, 2H), 5.44 (d,  $J = 6.2$  Hz, 2H), 5.28 (d,  $J = 8.7$  Hz, 2H), 4.24 (dd,  $J = 10.9, 4.7$  Hz, 2H), 3.81-3.76 (m, 2H), 3.59 (dd,  $J = 11.0, 3.4$  Hz, 2H), 0.93 (s, 18H).  **$^{13}C$  NMR** (100 MHz,  $CDCl_3$ )  $\delta$  156.7, 148.0, 144.1, 143.9, 135.5, 134.5 (q,  $^2J_{C-F} = 32.7$  Hz), 132.2, 132.2, 130.3, 130.1, 130.1, 128.0, 128.0, 127.8, 127.3, 126.3 (q,  $^3J_{C-F} = 4.0$  Hz), 124.0, 123.1 (q,  $^1J_{C-F} = 273.2$  Hz), 106.7, 79.2, 79.1, 61.7, 60.6, 26.9, 19.2.  **$^{19}F$  NMR** (376 MHz,  $CDCl_3$ )  $\delta$  -66.13. **HRMS** (ESI)  $m/z$  Calcd for  $[C_{70}H_{67}F_6IN_4O_{12}S_2Si_2, M+Na]^+$ : 1539.2577, found 1539.2573.

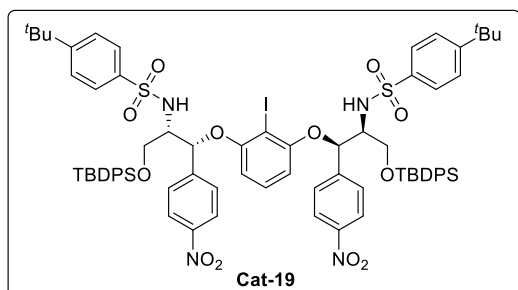

**Cat-19** was prepared using **11** (1.1 g, 1.0 mmol, 1.0 equiv.),  $Et_3N$  (232.3 mg, 2.3 mmol, 2.3 equiv.) and 4-tert-butylbenzenesulfonyl chloride (513 mg, 2.2 mmol, 2.2 equiv.). The crude residue was

purified by MeOH to precipitate the title compound (1.223 g, 0.82 mmol, 82%) as a white solid. **MP:** 128.3-130.4 °C.  **$^1H$  NMR** (400 MHz,  $CDCl_3$ )  $\delta$  8.09 (d,  $J = 8.6$  Hz, 4H), 7.57 (d,  $J = 8.5$  Hz, 4H), 7.46 – 7.35 (m, 14H), 7.30 – 7.24 (m, 10H), 7.17 – 7.10

(m, 4H), 6.80 (t,  $J = 8.3$  Hz, 1H), 6.01 (d,  $J = 8.4$  Hz, 2H), 5.46 (d,  $J = 6.5$  Hz, 2H), 5.24 (d,  $J = 8.5$  Hz, 2H), 4.26 (dd,  $J = 10.7, 4.4$  Hz, 2H), 3.76 – 3.68 (m, 2H), 3.65 (dd,  $J = 10.8, 3.4$  Hz, 2H), 1.25 (s, 18H), 0.94 (s, 18H).  $^{13}\text{C}$  NMR (100 MHz,  $\text{CDCl}_3$ )  $\delta$  156.8, 156.7, 147.9, 144.6, 137.1, 135.5, 135.4, 132.4, 130.1, 129.9, 127.9, 127.9, 126.8, 126.1, 123.9, 106.6, 79.3, 78.8, 61.8, 60.2, 35.1, 31.1, 26.9, 19.3. **HRMS** (ESI)  $m/z$  Calcd for  $[\text{C}_{76}\text{H}_{85}\text{IN}_4\text{O}_{12}\text{S}_2\text{Si}_2, \text{M}+\text{Na}]^+$ : 1515.4081, found 1515.4094.

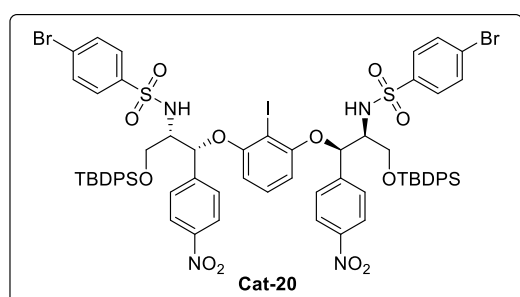

**Cat-20** was prepared using **11** (1.1 g, 1.0 mmol, 1.0 equiv.),  $\text{Et}_3\text{N}$  (232.3 mg, 2.3 mmol, 2.3 equiv.) and 4-tert-butylbenzenesulfonyl chloride (563 mg, 2.2 mmol, 2.2 equiv.). The crude residue was

purified by MeOH to precipitate the title compound (1.382 g, 0.9 mmol, 90%) as a white solid. **MP**: 116.2-118.4 °C.  $^1\text{H}$  NMR (400 MHz,  $\text{CDCl}_3$ )  $\delta$  8.10 (d,  $J = 8.8$  Hz, 4H), 7.51-7.34 (m, 22H), 7.34-7.26 (m, 6H), 7.14 (t,  $J = 7.6$  Hz, 4H), 6.82 (t,  $J = 8.4$  Hz, 1H), 6.00 (d,  $J = 8.5$  Hz, 2H), 5.41 (d,  $J = 6.6$  Hz, 2H), 5.24 (d,  $J = 8.8$  Hz, 2H), 4.24 (dd,  $J = 10.8, 4.3$  Hz, 2H), 3.80-3.70 (m, 1H), 3.61 (dd,  $J = 10.8, 3.4$  Hz, 2H), 0.95 (s, 18H).  $^{13}\text{C}$  NMR (100 MHz,  $\text{CDCl}_3$ )  $\delta$  156.6, 147.9, 144.3, 139.3, 135.5, 135.4, 132.4, 132.2, 130.2, 130.1, 130.0, 128.3, 128.0, 127.9, 127.9, 124.0, 106.6, 79.3, 78.7, 61.8, 60.4, 26.9, 19.2. **HRMS** (ESI)  $m/z$  Calcd for  $[\text{C}_{68}\text{H}_{67}\text{Br}_2\text{IN}_4\text{O}_{12}\text{S}_2\text{Si}_2, \text{M}+\text{Na}]^+$ : 1559.1039, found 1559.1039.

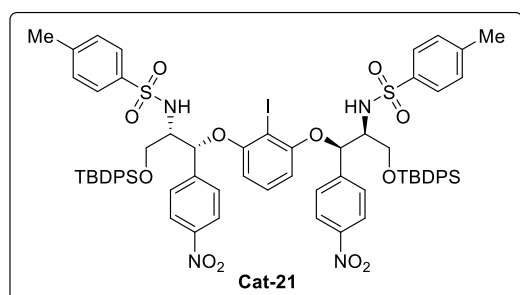

**Cat-21** was prepared using **11** (1.1 g, 1.0 mmol, 1.0 equiv.),  $\text{Et}_3\text{N}$  (232.3 mg, 2.3 mmol, 2.3 equiv.) and Tosyl chloride (419.4 mg, 2.2 mmol, 2.2 equiv.). The crude residue was

purified by MeOH to precipitate the title compound (1.324 g, 0.94 mmol, 94%) as a white solid. **MP**: 116.0-119.6 °C.  $^1\text{H}$  NMR (400 MHz,  $\text{CDCl}_3$ )  $\delta$  7.86 (d,  $J = 8.5$  Hz, 4H), 7.40-7.17 (m, 18H), 7.15-7.05 (m, 6H), 7.00-6.90 (m, 4H), 6.86 (d,  $J = 8.1$  Hz, 4H), 6.64 (t,  $J = 8.3$

Hz, 1H), 5.88 (d,  $J = 8.5$  Hz, 2H), 5.39-5.21 (m, 4H), 4.16 (dd,  $J = 10.6, 3.6$  Hz, 2H), 3.73-3.51 (m, 4H), 2.12 (s, 6H), 0.80 (s, 18H).  $^{13}\text{C}$  NMR (100 MHz,  $\text{CDCl}_3$ )  $\delta$  156.5, 147.6, 144.7, 143.5, 137.2, 135.4, 135.3, 132.3, 129.9, 129.7, 129.5, 127.9, 127.8, 127.7, 126.7, 123.6, 106.4, 79.2, 78.1, 62.1, 60.1, 26.8, 21.3, 19.1. HRMS (ESI)  $m/z$  Calcd for  $[\text{C}_{70}\text{H}_{73}\text{IN}_4\text{O}_{12}\text{S}_2\text{Si}_2, \text{M}+\text{H}]^+$ : 1409.3322, found 1409.3314.

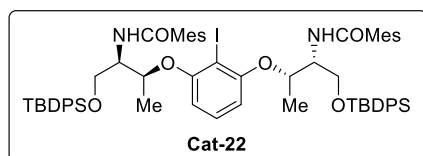

**Cat-22** was prepared using **SI-13'** (886.3 mg, 1.0 mmol, 1.0 equiv.) starting from *L*-threonine,  $\text{Et}_3\text{N}$  (232.3 mg, 2.3 mmol, 2.3 equiv.) and mesitylcarbonylchloride (401.6 mg, 2.2 mmol, 2.2 equiv.). The crude residue was recrystallized by  $\text{CH}_2\text{Cl}_2$  and hexane to yield the title compound as a white solid (1.013 g, 0.86 mmol, 86%).

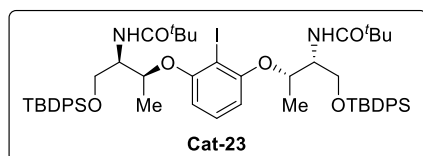

**Cat-23** was prepared using **SI-13'** (886.3 mg, 1.0 mmol, 1.0 equiv.) starting from *L*-threonine,  $\text{Et}_3\text{N}$  (232.3 mg, 2.3 mmol, 2.3 equiv.) and pivaloyl chloride (265.3 mg, 2.2 mmol, 2.2 equiv.). The crude residue was recrystallized by  $\text{CH}_2\text{Cl}_2$  and hexane to yield the title compound as a white solid (0.78 g, 0.74 mmol, 74%).

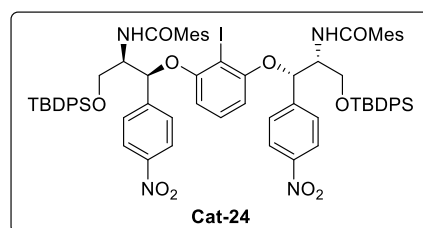

**Cat-24** was prepared using **11'** (1.1 g, 1.0 mmol, 1.0 equiv.) starting from (1*R*,2*R*)-ANP,  $\text{Et}_3\text{N}$  (232.3 mg, 2.3 mmol, 2.3 equiv.) and 2,4,6-trimethylbenzoyl chloride (401.6 mg, 2.2 mmol, 2.2 equiv.). The crude residue was purified by MeOH to precipitate the title compound as a white solid (1.198 g, 0.86 mmol, 86%).

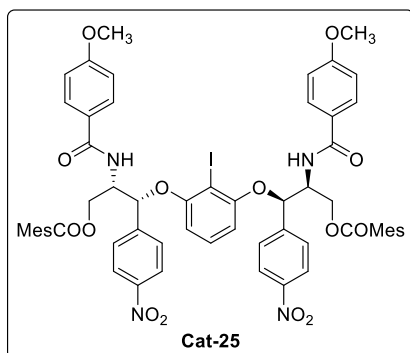

**Cat-25** was prepared using **SI-4-1** (0.916 g, 1.0 mmol, 1.0 equiv.), Et<sub>3</sub>N (232.3 mg, 2.3 mmol, 2.3 equiv.) and 4-methoxybenzoyl chloride (375.3 mg, 2.2 mmol, 2.2 equiv.). The crude residue was purified by MeOH to precipitate the title compound (1.1 g, 0.93 mmol, 93%) as a white solid. **MP:** 220.1-221.4 °C. **<sup>1</sup>H NMR** (400 MHz, CDCl<sub>3</sub>) δ

8.18 (d, *J* = 8.8 Hz, 4H), 7.78 (d, *J* = 8.9 Hz, 4H), 7.63 (d, *J* = 8.6 Hz, 4H), 7.08 (d, *J* = 7.9 Hz, 2H), 6.95 (d, *J* = 8.8 Hz, 4H), 6.85-6.81 (t, *J* = 8.3 Hz, 1H), 6.79 (s, 4H), 6.04 (d, *J* = 8.4 Hz, 2H), 5.72 (d, *J* = 3.6 Hz, 2H), 5.40-5.28 (m, 2H), 4.95-4.82 (m, 2H), 4.32 (dd, *J* = 11.9, 3.6 Hz, 2H), 3.87 (s, 6H), 2.25 (s, 6H), 2.16 (s, 12H). **<sup>13</sup>C NMR** (100 MHz, CDCl<sub>3</sub>) δ 170.7, 166.8, 162.8, 157.4, 147.9, 144.1, 140.0, 135.3, 130.3, 129.9, 129.0, 128.6, 127.1, 125.4, 124.3, 114.0, 107.4, 81.2, 79.4, 61.8, 55.6, 55.6, 21.2, 19.9. **HRMS** (ESI) *m/z* Calcd for [C<sub>60</sub>H<sub>57</sub>IN<sub>4</sub>O<sub>14</sub>, M+Na]<sup>+</sup>: 1207.2808, found 1207.2811.

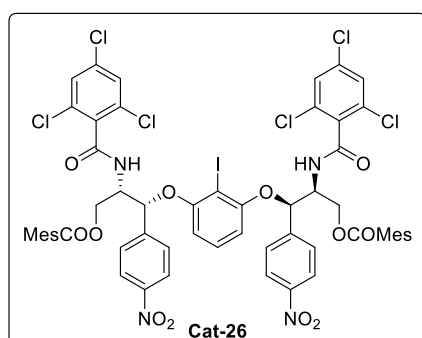

**Cat-26** was prepared using **SI-4-1** (0.916 g, 1.0 mmol, 1.0 equiv.), Et<sub>3</sub>N (232.3 mg, 2.3 mmol, 2.3 equiv.) and 2,4,6-trichlorobenzoyl chloride (534.6 mg, 2.2 mmol, 2.2 equiv.). The crude residue was purified by MeOH to precipitate the title compound (1.234 g, 0.93 mmol, 93%) as a white solid. **MP:** 170.4-173.9 °C. **<sup>1</sup>H NMR** (400 MHz, CDCl<sub>3</sub>) δ 8.15 (d, *J* = 8.8 Hz, 4H),

7.64 (d, *J* = 8.8 Hz, 4H), 7.23 (s, 4H), 6.91 (t, *J* = 8.3 Hz, 1H), 6.79 (s, 6H), 6.15 (d, *J* = 8.4 Hz, 2H), 5.81 (d, *J* = 4.3 Hz, 2H), 5.07 (dd, *J* = 11.7, 7.3 Hz, 2H), 5.00-4.90 (m, 2H), 4.58 (dd, *J* = 11.8, 4.0 Hz, 2H), 2.26 (s, 6H), 2.17 (s, 12H). **<sup>13</sup>C NMR** (100 MHz, CDCl<sub>3</sub>) δ 169.7, 164.0, 156.9, 147.9, 143.8, 140.1, 136.4, 135.6, 133.4, 132.8, 129.4,

128.7, 128.2, 127.5, 124.2, 107.1, 79.9, 61.8, 54.9, 21.2, 20.2. **HRMS** (ESI)  $m/z$  Calcd for  $[C_{58}H_{47}Cl_6IN_4O_{12}, M+Na]^+$ : 1351.0259, found 1351.0238.

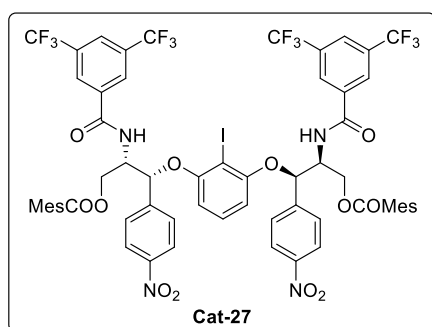

**Cat-27** was prepared using **SI-4-1** (0.916 g, 1.0 mmol, 1.0 equiv.),  $Et_3N$  (232.3 mg, 2.3 mmol, 2.3 equiv.) and 3,5-bis(trifluoromethyl)benzoyl chloride (609.4 mg, 2.2 mmol, 2.2 equiv.). The crude residue was purified by MeOH and water to precipitate the title compound (1.234 g, 0.94

mmol, 94%) as a white solid. **MP**: 140.0-142.7 °C.  **$^1H$  NMR** (400 MHz,  $CDCl_3$ )  $\delta$  8.28 (d,  $J = 1.6$  Hz, 4H), 8.19 (d,  $J = 8.8$  Hz, 4H), 8.05 (s, 2H), 7.67 (d,  $J = 8.9$  Hz, 4H), 7.56 (d,  $J = 8.0$  Hz, 2H), 6.90 (t,  $J = 8.3$  Hz, 1H), 6.81 (s, 4H), 6.12 (d,  $J = 8.5$  Hz, 2H), 5.76 (d,  $J = 4.0$  Hz, 2H), 5.28 (dd,  $J = 11.9, 8.6$  Hz, 2H), 5.03-4.94 (m, 2H), 4.45 (dd,  $J = 12.0, 3.5$  Hz, 2H), 2.25 (s, 6H), 2.18 (s, 12H).  **$^{13}C$  NMR** (100 MHz,  $CDCl_3$ )  $\delta$  170.6, 164.5, 157.3, 148.1, 143.7, 140.3, 135.5, 135.5, 132.43 (q,  $^2J_{C-F} = 34.2$  Hz), 130.5, 129.5, 128.8, 127.6, 127.6, 127.2, 125.7 (q,  $^3J_{C-F} = 2.2$  Hz), 124.4, 122.9 (q,  $^1J_{C-F} = 272.5$  Hz), 107.5, 80.8, 79.0, 61.9, 55.7, 21.1, 20.0.  **$^{19}F$  NMR** (376 MHz,  $CDCl_3$ )  $\delta$  -62.83. **HRMS** (ESI)  $m/z$  Calcd for  $[C_{62}H_{49}F_{12}IN_4O_{12}, M+Na]^+$ : 1419.2092, found 1419.2098.

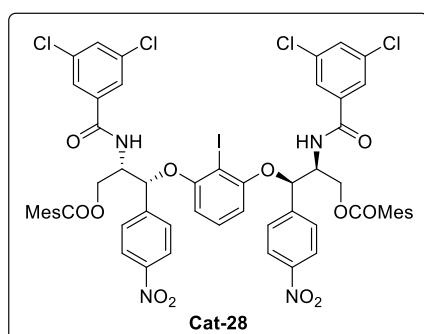

**Cat-28** was prepared using **SI-4-1** (0.916 g, 1.0 mmol, 1.0 equiv.),  $Et_3N$  (232.3 mg, 2.3 mmol, 2.3 equiv.) and 3,5-dichlorobenzoyl chloride (459.8 mg, 2.2 mmol, 2.2 equiv.). The crude residue was purified by MeOH and water to precipitate the title compound (1.171 g, 0.93 mmol, 93%) as a

white solid. **MP**: 180.0-182.4 °C.  **$^1H$  NMR** (400 MHz,  $CDCl_3$ )  $\delta$  8.21 (d,  $J = 8.8$  Hz, 4H), 7.65 (d,  $J = 8.6$  Hz, 8H), 7.53 (t,  $J = 1.9$  Hz, 2H), 7.19 (d,  $J = 8.0$  Hz, 2H), 6.87 (t,  $J = 8.3$  Hz, 1H), 6.81 (s, 4H), 6.08 (d,  $J = 8.5$  Hz, 2H), 5.69 (d,  $J = 3.9$  Hz, 2H), 5.25 (dd,  $J = 11.9, 8.8$  Hz, 2H), 4.94-4.83 (m, 2H), 4.38 (dd,  $J = 11.9, 3.5$  Hz, 2H),

2.26 (s, 6H), 2.17 (s, 12H).  $^{13}\text{C NMR}$  (100 MHz,  $\text{CDCl}_3$ )  $\delta$  170.6, 164.8, 157.4, 148.1, 143.7, 140.2, 136.2, 135.8, 135.5, 132.2, 130.5, 129.7, 128.8, 127.2, 125.8, 124.4, 107.5, 80.9, 79.3, 61.8, 55.6, 21.2, 20.1. **HRMS** (ESI)  $m/z$  Calcd for  $[\text{C}_{58}\text{H}_{49}\text{Cl}_4\text{IN}_4\text{O}_{12}, \text{M}+\text{H}]^+$ : 1261.1219, found 1261.1220.

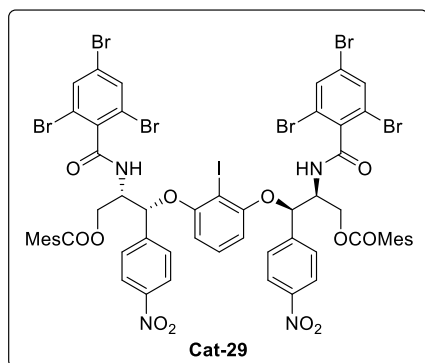

**Cat-29** was prepared using **SI-4-1** (0.916 g, 1.0 mmol, 1.0 equiv.),  $\text{Et}_3\text{N}$  (232.3 mg, 2.3 mmol, 2.3 equiv.) and 2,4,6-triBromobenzoyl chloride (600.6 mg, 2.2 mmol, 2.2 equiv.). The crude residue was purified by MeOH to precipitate the title compound (1.271 g, 0.8 mmol, 80%) as a white solid. **MP**: 171.2-175.9 °C.  $^1\text{H NMR}$  (400

MHz,  $\text{CDCl}_3$ )  $\delta$  8.21 (dd,  $J = 9.0, 2.3$  Hz, 4H), 7.67-7.59 (m, 8H), 6.88 (t,  $J = 8.3$  Hz, 1H), 6.80 (s, 4H), 6.57 (d,  $J = 8.0$  Hz, 2H), 6.10 (d,  $J = 8.4$  Hz, 2H), 5.83 (d,  $J = 3.8$  Hz, 2H), 5.03-4.88 (m, 4H), 4.57 (dd,  $J = 11.3, 3.6$  Hz, 2H), 2.27 (s, 6H), 2.20 (s, 12H).  $^{13}\text{C NMR}$  (100 MHz,  $\text{CDCl}_3$ )  $\delta$  169.7, 165.9, 157.0, 148.1, 143.7, 140.3, 137.7, 135.8, 134.5, 130.3, 129.5, 128.8, 127.4, 124.5, 124.4, 120.8, 107.3, 80.2, 80.1, 61.5, 54.8, 21.3, 20.5. **HRMS** (ESI)  $m/z$  Calcd for  $[\text{C}_{58}\text{H}_{47}\text{Br}_6\text{IN}_4\text{O}_{12}, \text{M}+\text{Na}]^+$ : 1614.7228, found 1614.7188.

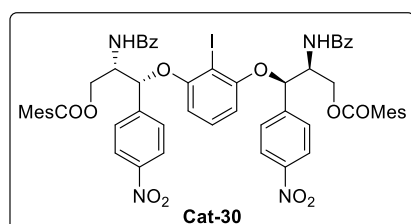

**Cat-30** was prepared using **SI-4-1** (0.916 g, 1.0 mmol, 1.0 equiv.),  $\text{Et}_3\text{N}$  (232.3 mg, 2.3 mmol, 2.3 equiv.) and BzCl (310.2 mg, 2.2 mmol, 2.2 equiv.). The crude residue was purified by MeOH to

precipitate the title compound (0.9 g, 0.80 mmol, 80%) as a white solid. **MP**: 160.4-163.1 °C.  $^1\text{H NMR}$  (400 MHz,  $\text{CDCl}_3$ )  $\delta$  8.19 (d,  $J = 8.8$  Hz, 4H), 7.82 (d,  $J = 7.5$  Hz, 4H), 7.64 (d,  $J = 8.8$  Hz, 4H), 7.57 (t,  $J = 7.4$  Hz, 2H), 7.48 (t,  $J = 7.7$  Hz, 4H), 7.16 (d,  $J = 8.0$  Hz, 2H), 6.83 (t,  $J = 8.3$  Hz, 1H), 6.79 (s, 4H), 6.04 (d,  $J = 8.4$  Hz, 2H), 5.72 (d,  $J = 3.8$  Hz, 2H), 5.34 (dd,  $J = 11.9, 8.9$  Hz, 2H), 4.95-4.86 (m, 2H), 4.34 (dd,  $J = 11.9, 3.6$  Hz, 2H), 2.25 (s, 6H), 2.16 (s, 12H).  $^{13}\text{C NMR}$  (100 MHz,  $\text{CDCl}_3$ )  $\delta$

170.7, 167.3, 157.4, 148.0, 144.0, 140.1, 135.4, 133.2, 132.4, 130.4, 129.9, 129.0, 128.7, 127.2, 127.1, 124.4, 107.4, 81.1, 79.4, 61.8, 55.6, 21.2, 20.0. **HRMS** (ESI)  $m/z$  Calcd for  $[C_{58}H_{53}IN_4O_{12}, M+Na]^+$ : 1147.2597, found 1147.2590.

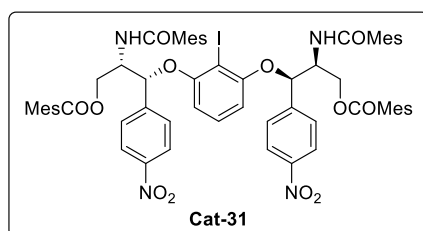

**Cat-31** was prepared using **SI-4-1** (0.916 g, 1.0 mmol, 1.0 equiv.), Et<sub>3</sub>N (232.3 mg, 2.3 mmol, 2.3 equiv.) and 2,4,6-trimethylbenzoyl chloride (401.6 mg, 2.2 mmol, 2.2 equiv.). The crude residue was purified by MeOH to precipitate the title

compound (1.0 g, 0.83 mmol, 83%) as a white solid. **MP**: 164.0-167.0 °C. **<sup>1</sup>H NMR** (400 MHz, CDCl<sub>3</sub>)  $\delta$  8.18 (d,  $J$  = 8.5 Hz, 4H), 7.66 (d,  $J$  = 8.5 Hz, 4H), 6.94 (t,  $J$  = 8.4 Hz, 1H), 6.80 (d,  $J$  = 11.4 Hz, 8H), 6.45 (d,  $J$  = 8.6 Hz, 2H), 6.19 (d,  $J$  = 8.6 Hz, 2H), 5.78 (d,  $J$  = 4.9 Hz, 2H), 5.08-5.03 (m, 1H), 4.95 (dd,  $J$  = 11.7, 7.2 Hz, 2H), 4.63 (dd,  $J$  = 11.7, 3.2 Hz, 2H), 2.27 (s, 12H), 2.20 (s, 12H), 1.97 (s, 12H). **<sup>13</sup>C NMR** (100 MHz, CDCl<sub>3</sub>)  $\delta$  170.5, 169.4, 156.9, 147.8, 143.9, 139.9, 139.0, 135.3, 133.9, 133.7, 130.1, 129.6, 128.5, 128.3, 127.5, 124.0, 106.8, 79.9, 79.5, 62.2, 53.8, 21.1, 21.0, 20.0, 18.7. **HRMS** (ESI)  $m/z$  Calcd for  $[C_{64}H_{65}IN_4O_{12}, M+H]^+$ : 1209.3716, found 1209.3719.

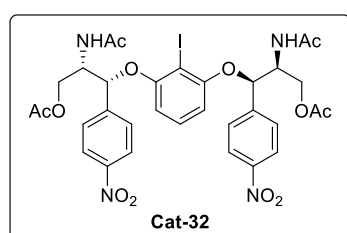

**Cat-32** was prepared using **SI-4-2** (0.708 g, 1.0 mmol, 1.0 equiv.), Et<sub>3</sub>N (232.3 mg, 2.3 mmol, 2.3 equiv.) and acetyl chloride (173.8 mg, 2.2 mmol, 2.2 equiv.). The crude residue was purified by MeOH to precipitate the title compound (0.665 g, 0.84 mmol, 84%) as a white

solid. **MP**: 161.3-164.1 °C. **<sup>1</sup>H NMR** (400 MHz, CDCl<sub>3</sub>)  $\delta$  8.21 (d,  $J$  = 8.6 Hz, 4H), 7.57 (d,  $J$  = 8.6 Hz, 4H), 6.87 (t,  $J$  = 8.4 Hz, 1H), 6.30 (d,  $J$  = 8.0 Hz, 2H), 6.05 (d,  $J$  = 8.5 Hz, 2H), 5.54 (d,  $J$  = 3.3 Hz, 2H), 4.72-4.53 (m, 4H), 4.21-4.09 (m, 2H), 1.99 (s, 12H). **<sup>13</sup>C NMR** (100 MHz, CDCl<sub>3</sub>)  $\delta$  171.2, 170.4, 157.1, 147.9, 144.0, 130.3, 127.2, 124.3, 107.3, 80.8, 79.2, 61.6, 54.0, 23.5, 20.9. **HRMS** (ESI)  $m/z$  Calcd for  $[C_{32}H_{33}IN_4O_{12}, M+H]^+$ : 793.1212, found 793.1217.



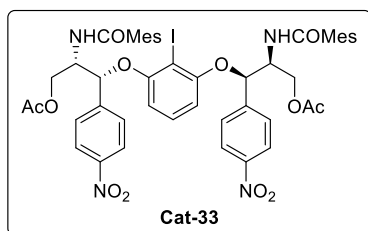

**Cat-33** was prepared using **SI-4-2** (0.708 g, 1.0 mmol, 1.0 equiv.), Et<sub>3</sub>N (232.3 mg, 2.3 mmol, 2.3 equiv.) and 2,4,6-trimethylbenzoyl chloride (401.6 mg, 2.2 mmol, 2.2 equiv.). The crude residue was purified by MeOH to precipitate the title compound (0.920 g, 0.92 mmol,

92%) as a white solid. **MP**: 298.5-301.4 °C. **<sup>1</sup>H NMR** (400 MHz, CDCl<sub>3</sub>) δ 8.26 (d, *J* = 8.8 Hz, 4H), 7.64 (d, *J* = 8.8 Hz, 4H), 6.93 (t, *J* = 8.3 Hz, 1H), 6.83 (s, 4H), 6.35 (d, *J* = 8.3 Hz, 2H), 6.14 (d, *J* = 8.5 Hz, 2H), 5.78 (d, *J* = 3.8 Hz, 2H), 4.92-4.83 (m, 2H), 4.68 (dd, *J* = 11.9, 8.9 Hz, 2H), 4.24 (dd, *J* = 11.8, 3.6 Hz, 2H), 2.29 (s, 6H), 2.06 (s, 12H), 2.01 (s, 6H). **<sup>13</sup>C NMR** (100 MHz, CDCl<sub>3</sub>) δ 170.9, 157.1, 148.1, 143.7, 139.2, 134.1, 133.9, 130.5, 128.4, 127.4, 124.3, 106.9, 80.6, 79.4, 61.4, 54.2, 21.2, 20.8, 18.9. **HRMS** (ESI) *m/z* Calcd for [C<sub>48</sub>H<sub>49</sub>IN<sub>4</sub>O<sub>12</sub>, M+Na]<sup>+</sup>: 1023.2284, found 1043.2294.

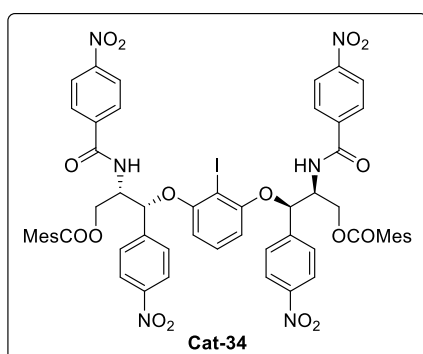

**Cat-34** was prepared using **SI-4-1** (0.916 g, 1.0 mmol, 1.0 equiv.), Et<sub>3</sub>N (232.3 mg, 2.3 mmol, 2.3 equiv.) and 4-nitrobenzoyl chloride (408.2 mg, 2.2 mmol, 2.2 equiv.). The crude residue was purified by MeOH to precipitate the title compound (1.130 g, 0.93 mmol, 93%) as a white solid. **MP**: 168.0-171.5 °C. **<sup>1</sup>H NMR** (400 MHz, CDCl<sub>3</sub>) δ 8.30-8.24 (m, 4H), 8.20 (d, *J* = 8.9 Hz, 4H), 7.97 (d, *J* = 8.8 Hz, 4H), 7.65 (d, *J* = 8.8 Hz, 4H), 7.43 (dd, *J* = 8.0, 3.6 Hz, 2H), 6.88 (t, *J* = 8.3 Hz, 1H), 6.79 (s, 4H), 6.08 (dd, *J* = 8.4, 1.9 Hz, 2H), 5.73 (d, *J* = 3.9 Hz, 2H), 5.40 (dd, *J* = 12.0, 9.1 Hz, 2H), 4.95-4.86 (m, 1H), 4.41-4.33 (m, 2H), 2.24 (s, 6H), 2.14 (s, 12H). **<sup>13</sup>C NMR** (100 MHz, CDCl<sub>3</sub>) δ 171.0, 165.2, 157.3, 150.0, 148.1, 143.6, 140.3, 138.6, 135.3, 130.5, 129.5, 128.8, 128.4, 127.1, 124.5, 124.1, 107.6, 81.0, 79.4, 61.8, 56.0, 21.2, 20.0. **HRMS** (ESI) *m/z* Calcd for [C<sub>58</sub>H<sub>47</sub>Br<sub>6</sub>IN<sub>4</sub>O<sub>12</sub>, M+H]<sup>+</sup>: 1209.3716, found 1209.3719.

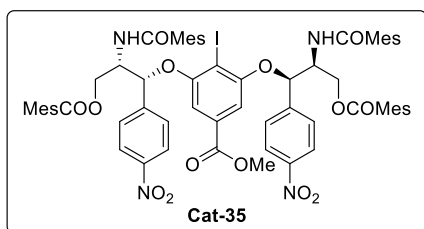

**Cat-35** was prepared using **SI-15-2** (0.974 g, 1.0 mmol, 1.0 equiv.), Et<sub>3</sub>N (232.3 mg, 2.3 mmol, 2.3 equiv.) and 2,4,6-trimethylbenzoyl chloride (401.6 mg, 2.2 mmol, 2.2 equiv.). The crude residue was

purified by MeOH and water to precipitate the title compound (1.126 g, 0.89 mmol, 89%) as a white solid. **MP:** 134.0-137.3 °C. **<sup>1</sup>H NMR** (400 MHz, CDCl<sub>3</sub>) δ 8.22 (d, *J* = 8.8 Hz, 4H), 7.67 (d, *J* = 8.8 Hz, 4H), 6.79 (d, *J* = 16.0 Hz, 10H), 6.22 (d, *J* = 8.6 Hz, 2H), 5.81 (d, *J* = 5.1 Hz, 2H), 5.06 (m, 2H), 4.94 (dd, *J* = 11.7, 6.6 Hz, 2H), 4.57 (dd, *J* = 11.8, 3.9 Hz, 2H), 3.73 (s, 3H), 2.26 (s, 6H), 2.26 (s, 6H), 2.17 (s, 12H), 1.94 (s, 12H). **<sup>13</sup>C NMR** (100 MHz, CDCl<sub>3</sub>) δ 170.6, 169.6, 165.2, 157.0, 148.2, 143.4, 140.2, 139.3, 135.4, 134.1, 133.7, 132.4, 129.7, 128.7, 128.5, 127.7, 124.4, 107.3, 86.1, 79.9, 62.3, 53.8, 52.8, 21.2, 21.2, 20.1, 18.9. **HRMS** (ESI) *m/z* Calcd for [C<sub>66</sub>H<sub>67</sub>IN<sub>4</sub>O<sub>14</sub>, M+Na]<sup>+</sup>: 1289.3591, found 1289.3595.

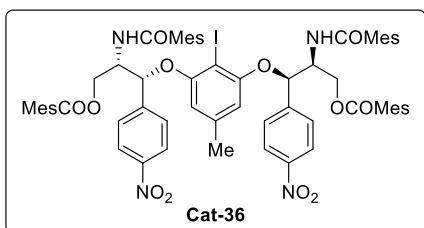

**Cat-36** was prepared using **SI-15-1** (0.930 g, 1.0 mmol, 1.0 equiv.), Et<sub>3</sub>N (232.3 mg, 2.3 mmol, 2.3 equiv.) and 2,4,6-trimethylbenzoyl chloride (401.6 mg, 2.2 mmol, 2.2 equiv.). The crude residue was

purified by MeOH and water to precipitate the title compound (1.038 g, 0.85 mmol, 85%) as a white solid. **MP:** 147.3-149.7 °C. **<sup>1</sup>H NMR** (400 MHz, CDCl<sub>3</sub>) δ 8.22 (d, *J* = 8.9 Hz, 4H), 7.66 (d, *J* = 8.8 Hz, 4H), 6.79 (d, *J* = 4.6 Hz, 8H), 6.29 (d, *J* = 8.4 Hz, 2H), 5.96 (s, 2H), 5.78 (d, *J* = 4.4 Hz, 2H), 4.98 (m, 2H), 4.89 (dd, *J* = 11.6, 7.5 Hz, 2H), 4.55 (dd, *J* = 11.6, 4.0 Hz, 2H), 2.28 (s, 6H), 2.26 (s, 6H), 2.18 (s, 12H), 2.00 (s, 3H), 1.97 (s, 12H). **<sup>13</sup>C NMR** (100 MHz, CDCl<sub>3</sub>) δ 170.7, 169.6, 156.8, 148.0, 144.1, 141.2, 140.1, 139.2, 135.5, 134.2, 133.8, 129.7, 128.6, 128.5, 128.5, 127.5, 124.3, 107.9, 79.9, 75.6, 62.1, 54.2, 21.9, 21.2, 21.2, 20.2, 18.9. **HRMS** (ESI) *m/z* Calcd for [C<sub>65</sub>H<sub>67</sub>IN<sub>4</sub>O<sub>12</sub>, M+Na]<sup>+</sup>: 1245.3692, found 1245.3704.

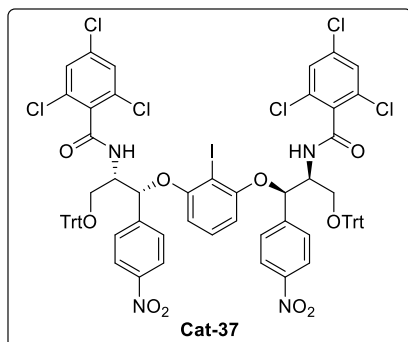

**Cat-37** was prepared following the procedure of synthesis of ether catalyst. The crude residue was purified by MeOH to precipitate the title compound (1.411 g, 0.92 mmol, 92%) as a white solid. **MP:** 159.3-162.4 °C. **<sup>1</sup>H NMR** (400 MHz, CDCl<sub>3</sub>) δ 8.15 (d, *J* = 8.8 Hz, 4H), 7.53 (d, *J* = 8.8 Hz, 4H),

7.38-7.29 (m, 16H), 7.19 (dd, *J* = 5.1, 1.9 Hz, 18H), 6.86 (t, *J* = 8.3 Hz, 1H), 6.11 (t, *J* = 8.6 Hz, 4H), 5.76 (d, *J* = 4.6 Hz, 2H), 4.86-4.76 (m, 2H), 3.84 (dd, *J* = 10.4, 6.9 Hz, 2H), 3.48 (dd, *J* = 10.4, 3.5 Hz, 2H). **<sup>13</sup>C NMR** (100 MHz, CDCl<sub>3</sub>) δ 163.9, 157.0, 147.9, 144.3, 143.4, 136.3, 133.9, 133.0, 130.2, 128.7, 128.3, 128.0, 127.7, 127.3, 124.1, 106.8, 87.4, 80.1, 79.8, 60.9, 55.8. **HRMS** (ESI) *m/z* Calcd for [C<sub>76</sub>H<sub>57</sub>Cl<sub>6</sub>IN<sub>4</sub>O<sub>10</sub>, M+Na]<sup>+</sup>: 1543.0986, found 1543.0985.

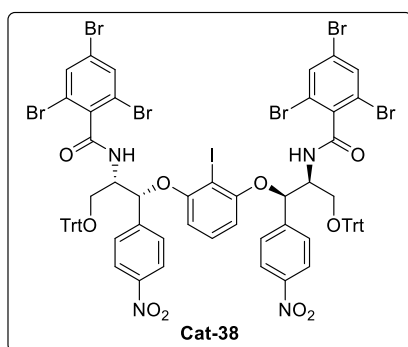

**Cat-38** was prepared following the procedure of synthesis of ether catalyst. The crude residue was purified by MeOH to precipitate the title compound (1.462 g, 0.82 mmol, 82%) as a white solid. **MP:** 187.2-189.4 °C. **<sup>1</sup>H NMR** (400 MHz, CDCl<sub>3</sub>) δ 8.14 (d, *J* = 8.5 Hz, 4H), 7.66 (s, 4H), 7.52 (d, *J* =

8.8 Hz, 4H), 7.38-7.31 (m, 12H), 7.24-7.17 (m, 18H), 6.84 (t, *J* = 8.3 Hz, 1H), 6.18-6.02 (m, 3H), 5.82 (d, *J* = 3.8 Hz, 2H), 4.81-4.71 (m, 2H), 3.89-3.80 (m, 2H), 3.53 (dd, *J* = 10.4, 3.7 Hz, 2H). **<sup>13</sup>C NMR** (100 MHz, CDCl<sub>3</sub>) δ 165.9, 157.0, 147.8, 144.2, 143.4, 138.1, 134.3, 130.1, 128.7, 128.0, 127.5, 127.3, 124.2, 124.1, 120.9, 106.8, 87.4, 80.3, 79.8, 60.7, 56.2. **HRMS** (ESI) *m/z* Calcd for [C<sub>76</sub>H<sub>55</sub>Br<sub>6</sub>IN<sub>4</sub>O<sub>10</sub>, M+Na]<sup>+</sup>: 1806.7955, found 1806.7957.

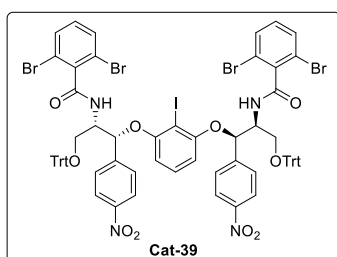

**Cat-39** was prepared following the procedure of synthesis of ether catalyst. The crude residue was purified by MeOH to precipitate the title compound (1.462 g, 0.82 mmol, 82%) as a white solid. **MP:** 185.1-

187.3 °C. **<sup>1</sup>H NMR** (400 MHz, CDCl<sub>3</sub>) δ 8.07 (d, *J* = 8.5 Hz, 4H), 7.42 (dd, *J* = 16.3, 8.3 Hz, 8H), 7.31-7.24 (m, 12H), 7.17-6.98 (m, 20H), 6.73 (t, *J* = 8.3 Hz, 1H), 6.01 (dd, *J* = 24.5, 8.2 Hz, 4H), 5.77 (d, *J* = 3.9 Hz, 2H), 4.77-4.65 (m, 2H), 3.79-3.71 (m, 2H), 3.46 (dd, *J* = 10.5, 3.9 Hz, 2H). **<sup>13</sup>C NMR** (100 MHz, CDCl<sub>3</sub>) δ 166.6, 156.9, 147.7, 144.4, 143.4, 139.1, 131.8, 131.7, 130.0, 128.7, 127.9, 127.4, 127.2, 124.0, 120.4, 106.8, 87.3, 80.4, 79.8, 60.7, 56.1. **HRMS** (ESI) *m/z* Calcd for [C<sub>76</sub>H<sub>57</sub>Br<sub>4</sub>IN<sub>4</sub>O<sub>10</sub>, M+Na]<sup>+</sup>: 1650.9745, found 1650.9754.

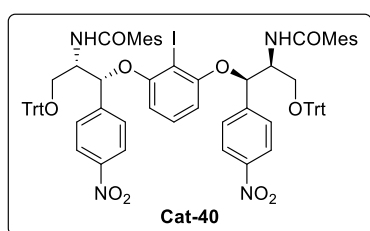

**Cat-40** was prepared following the procedure of synthesis of ether catalyst. The crude residue was purified by MeOH to precipitate the title compound (1.148 g, 0.82 mmol, 82%) as a white solid. **MP:**

192.0-194.5 °C. **<sup>1</sup>H NMR** (400 MHz, CDCl<sub>3</sub>) δ 8.11 (d, *J* = 8.8 Hz, 4H), 7.51 (d, *J* = 8.8 Hz, 4H), 7.29-7.22 (m, 12H), 7.18-7.01 (m, 18H), 6.82 (t, *J* = 8.3 Hz, 1H), 6.73 (s, 4H), 6.09 (d, *J* = 8.5 Hz, 2H), 6.01 (d, *J* = 8.4 Hz, 2H), 5.75 (d, *J* = 4.9 Hz, 2H), 4.86-4.80 (m, 2H), 3.76 (dd, *J* = 10.2, 6.8 Hz, 2H), 3.41 (dd, *J* = 10.2, 3.4 Hz, 2H), 2.21 (s, 6H), 1.88 (s, 12H). **<sup>13</sup>C NMR** (100 MHz, CDCl<sub>3</sub>) δ 170.5, 156.9, 147.8, 144.6, 143.3, 138.9, 134.2, 134.1, 130.1, 128.5, 128.3, 127.9, 127.7, 127.2, 123.9, 106.4, 87.2, 79.7, 79.7, 61.3, 55.3, 21.1, 18.9. **HRMS** (ESI) *m/z* Calcd for [C<sub>82</sub>H<sub>73</sub>IN<sub>4</sub>O<sub>10</sub>, M+Na]<sup>+</sup>: 1423.4264, found 1423.4256.

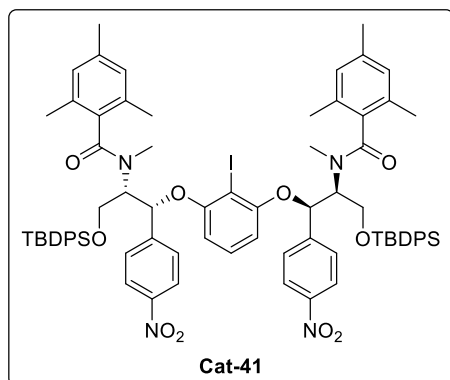

**Cat-41** was prepared following the procedure of synthesis of catalyst with N-Me amide moiety. CH<sub>3</sub>I (156 uL, 2.5 mmol, 2.5 equiv.) was dropwise to **Cat-8** (1.39 g, 1.0 mmol, 1.0 equiv.) and NaH (88 mg, 2.2 mmol, 2.2 equiv.). The crude residue was isolated through silica gel eluting with petroleum ether/ethyl acetate (5/1 to

2/1) to get **cat-41** (1.20 g, 83% yield) as a white solid. **MP:** 222.0- 125.4°C. **<sup>1</sup>H NMR** (400 MHz, CDCl<sub>3</sub>) δ 8.08 (d, *J* = 8.6 Hz, 4H), 7.58 (d, *J* = 7.0 Hz, 4H), 7.48 (dd, *J* = 12.7, 7.9 Hz, 8H), 7.41 (t, *J* = 7.4 Hz, 2H), 7.37-7.29 (m, 6H), 7.22 (t, *J* = 7.5 Hz, 4H),

6.86 (s, 2H), 6.82 (t,  $J = 8.4$  Hz, 1H), 6.74 (s, 2H), 6.06 (d,  $J = 8.4$  Hz, 2H), 5.90 (d,  $J = 4.1$  Hz, 2H), 5.15-4.97 (m, 2H), 4.70-4.54 (m, 2H), 3.80 (dd,  $J = 11.8, 3.3$  Hz, 2H), 3.09 (s, 6H), 2.27 (s, 6H), 2.20 (s, 6H), 1.69 (s, 6H), 0.99 (s, 18H).  $^{13}\text{C}$  NMR (100 MHz,  $\text{CDCl}_3$ )  $\delta$  173.0, 156.9, 147.7, 144.7, 138.3, 135.6, 135.5, 133.9, 133.3, 133.2, 132.9, 132.4, 130.2, 129.9, 128.4, 128.3, 127.9, 127.8, 127.4, 124.0, 106.1, 80.0, 78.4, 60.9, 59.5, 33.4, 26.8, 21.2, 19.1, 19.0, 18.3. HRMS (ESI)  $m/z$  Calcd for  $[\text{C}_{78}\text{H}_{85}\text{IN}_4\text{O}_{10}\text{Si}_2, \text{M}+\text{Na}]^+$ : 1443.4741, found 1443.4813.

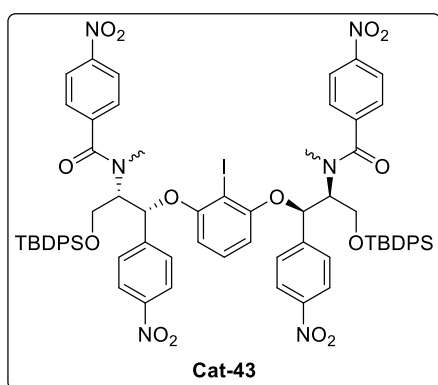

**Cat-43** was prepared following the procedure of synthesis of catalyst with N-Me amide moiety.  $\text{CH}_3\text{I}$  (156  $\mu\text{L}$ , 2.5 mmol, 2.5 equiv.) was dropwise to **Cat-9** (1.42 g, 1.0 mmol, 1.0 equiv.) and NaH (88 mg, 2.2 mmol, 2.2 equiv.). The crude residue was isolated through silica gel eluting with petroleum ether/ethyl acetate (5/1 to

2/1) to get **Cat-43** [1.22 g, 86% yield. (The atropisomer ratio of **Cat-43** = 4:1 was detected by  $^1\text{H}$  NMR in  $\text{CDCl}_3$ )] as a white solid. MP: 164.4- 167.3°C.  $^1\text{H}$  NMR (400 MHz,  $\text{CDCl}_3$ )  $\delta$  8.27 (d,  $J = 8.6$  Hz, 4H), 8.10 (d,  $J = 8.5$  Hz, 4H), 7.66–7.54 (m, 8H), 7.51–7.38 (m, 16H), 7.30 (t,  $J = 7.4$  Hz, 4H), 6.80 (t,  $J = 8.4$  Hz, 1H), 5.98 (d,  $J = 8.4$  Hz, 2H), 5.74 (d,  $J = 5.0$  Hz, 2H), 4.84–4.58 (m, 4H), 4.04 (d,  $J = 8.9$  Hz, 2H), 3.08 (s, 6H), 1.06 (s, 18H).  $^{13}\text{C}$  NMR (100 MHz,  $\text{CDCl}_3$ )  $\delta$  170.6, 156.6, 148.5, 147.9, 144.7, 142.4, 135.7, 135.6, 133.0, 132.5, 130.1, 128.0, 128.0, 127.9, 127.2, 124.1, 106.6, 79.7, 78.7, 64.8, 59.3, 36.7, 26.9, 19.3. HRMS (ESI)  $m/z$  Calcd for  $[\text{C}_{72}\text{H}_{71}\text{IN}_6\text{O}_{14}\text{Si}_2, \text{M}+\text{H}]^+$ : 1449.3504, found 1449.3537.

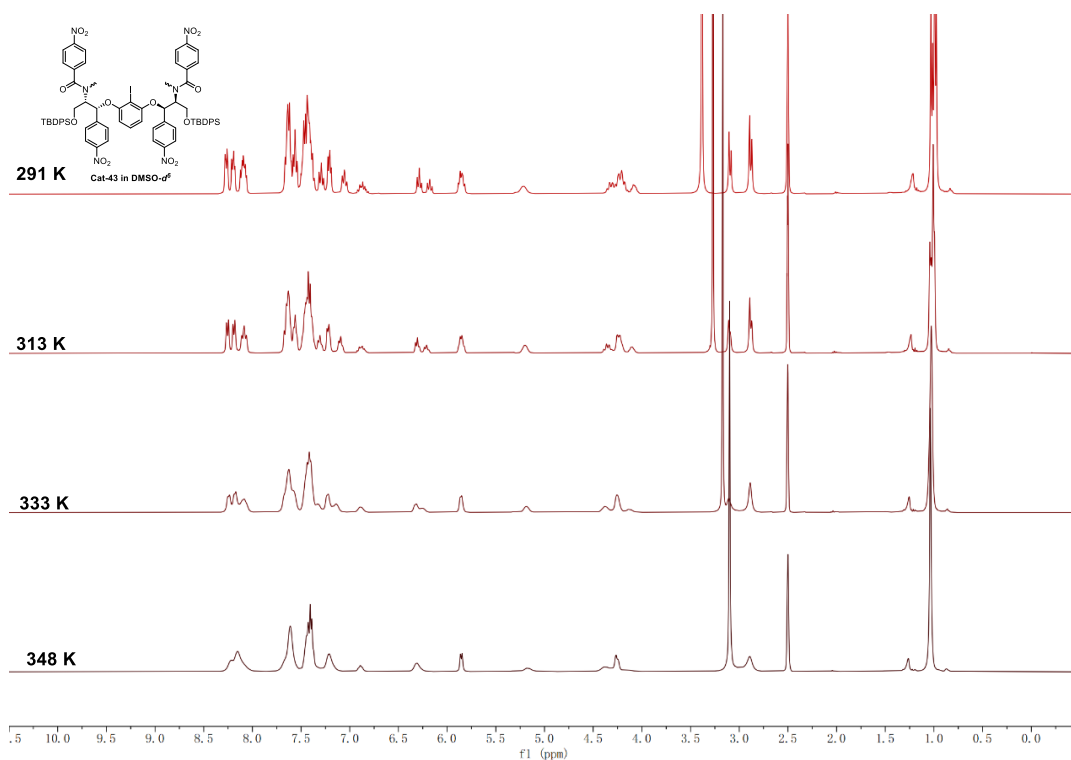

**Supplementary Figure 2.** Variable temperature NMR experiments of atropisomers **Cat-43** in DMSO- $d^6$

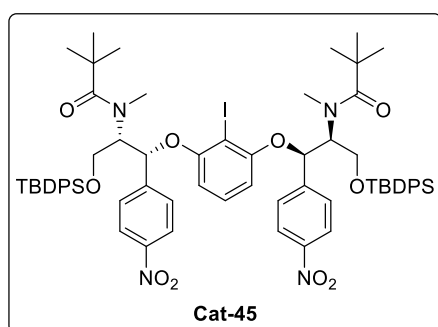

**Cat-45** was prepared following the procedure of synthesis of catalyst with N-Me amide moiety. CH<sub>3</sub>I (156  $\mu$ L, 2.5 mmol, 2.5 equiv.) was dropwise to **Cat-3** (1.27 g, 1.0 mmol, 1.0 equiv.) and NaH (88 mg, 2.2 mmol, 2.2 equiv.). The crude residue was isolated through silica gel

eluting with petroleum ether/ethyl acetate (10/1 to 3/1) to get **Cat-43** (583 mg, 45% yield) as a white solid. **MP**: 116.0-116.9 °C. **<sup>1</sup>H NMR** (400 MHz, CDCl<sub>3</sub>)  $\delta$  8.05 (d,  $J$  = 8.4 Hz, 4H), 7.74 – 7.22 (m, 24H), 6.71 (t,  $J$  = 8.3 Hz, 1H), 5.92 (d,  $J$  = 8.5 Hz, 2H), 5.66 (br s, 2H), 4.77 (br s, 2H), 4.57 (t,  $J$  = 10.6 Hz, 2H), 3.90 (br s, 2H), 3.26 (br s, 6H), 1.25 (s, 18H), 1.01 (s, 18H). **<sup>13</sup>C NMR** (100 MHz, CDCl<sub>3</sub>)  $\delta$  178.7, 156.7, 147.5, 145.4, 135.5, 135.5, 133.1, 132.8, 129.8, 129.7, 129.6, 127.8, 127.2, 123.6, 106.2, 80.0, 78.6, 61.9, 59.2, 39.1, 28.0, 26.7, 19.1. **HRMS** (ESI)  $m/z$  Calcd for [C<sub>68</sub>H<sub>81</sub>IN<sub>4</sub>O<sub>10</sub>Si<sub>2</sub>, M+K]<sup>+</sup>: 1335.4167, found 1335.4230.

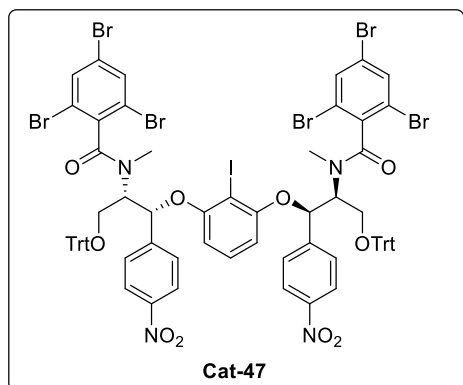

**Cat-47** was prepared following the procedure of synthesis of catalyst with N-Me amide moiety. CH<sub>3</sub>I (156 uL, 2.5 mmol, 2.5 equiv.) was dropwise to **Cat-38** (1.78 g, 1.0 mmol, 1.0 equiv.) and NaH (88 mg, 2.2 mmol, 2.2 equiv.). The crude residue was isolated through silica gel eluting with petroleum ether/ethyl acetate

(5/1 to 2/1) to get **Cat-47** (1.59 g, 86% yield) as a white solid. <sup>1</sup>H NMR (400 MHz, CDCl<sub>3</sub>) δ 8.15 (d, *J* = 8.8 Hz, 4H), 7.74 (d, *J* = 1.9 Hz, 2H), 7.62 (d, *J* = 1.9 Hz, 2H), 7.46 (d, *J* = 8.8 Hz, 4H), 7.34 (dd, *J* = 6.8, 3.1 Hz, 12H), 7.25-7.16 (m, 18H), 6.75 (t, *J* = 8.3 Hz, 1H), 5.95 (d, *J* = 8.5 Hz, 2H), 5.91 (s, 2H), 5.20-5.06 (m, 2H), 3.94 (t, *J* = 10.5 Hz, 2H), 3.51 (dd, *J* = 11.0, 3.5 Hz, 2H), 2.91 (s, 6H). <sup>13</sup>C NMR (100 MHz, CDCl<sub>3</sub>) δ 168.0, 156.6, 147.7, 144.4, 143.4, 138.2, 134.6, 134.2, 130.1, 128.6, 128.0, 127.3, 127.1, 124.1, 123.6, 120.6, 120.4, 106.1, 87.3, 80.3, 78.5, 60.1, 57.7, 33.1. HRMS (ESI) *m/z* Calcd for [C<sub>78</sub>H<sub>59</sub>Br<sub>6</sub>IN<sub>4</sub>O<sub>10</sub>, M+Na]<sup>+</sup>: 1834.8268, found 1834.8277.

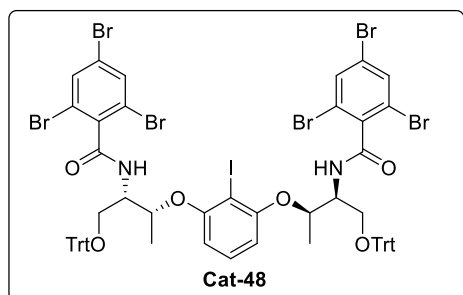

**Cat-48** was prepared following the procedure of synthesis of ether catalyst. The crude residue was purified by DCM and hexane to precipitate the title compound as a white solid. <sup>1</sup>H NMR (400 MHz, CDCl<sub>3</sub>) δ 7.64 (s, 4H), 7.41 (d, *J* = 6.8 Hz, 12H), 7.25 – 7.13 (m, 19H), 6.44 (d, *J* =

8.4 Hz, 2H), 5.98 (d, *J* = 8.6 Hz, 2H), 4.94 – 4.81 (m, 2H), 4.64 – 4.49 (m, 2H), 3.82 (dd, *J* = 10.1, 6.3 Hz, 2H), 3.62 (dd, *J* = 10.0, 3.4 Hz, 2H), 1.44 (d, *J* = 6.4 Hz, 6H). <sup>13</sup>C NMR (100 MHz, CDCl<sub>3</sub>) δ 165.7, 157.7, 143.7, 138.6, 134.3, 129.9, 128.9, 128.0, 127.2, 123.8, 121.1, 105.9, 87.1, 82.1, 74.9, 61.5, 54.8, 16.9. HRMS (ESI) *m/z* Calcd for [C<sub>66</sub>H<sub>77</sub>Br<sub>6</sub>IN<sub>2</sub>O<sub>6</sub>, M+Na]<sup>+</sup>: 1592.7941, found 1592.7988.

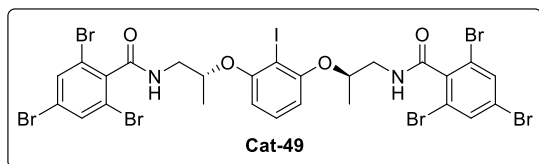

**Cat-49** were prepared according to the literature<sup>[8]</sup>. **<sup>1</sup>H NMR** (400 MHz, CDCl<sub>3</sub>)

δ 7.66 (s, 4H), 7.21 (t, *J* = 8.3 Hz, 1H),

6.54 (d, *J* = 8.3 Hz, 2H), 6.36 (t, *J* = 6.3 Hz, 2H), 4.70 (td, *J* = 6.9, 3.3 Hz, 2H), 3.94

(ddd, *J* = 14.0, 7.1, 3.3 Hz, 2H), 3.63–3.48 (m, 2H), 1.44 (d, *J* = 6.3 Hz, 6H). **<sup>13</sup>C**

**NMR** (100 MHz, CDCl<sub>3</sub>) δ 166.0, 157.7, 138.7, 134.4, 130.3, 123.9, 121.0, 107.6,

82.9, 75.2, 44.9, 17.7. **HRMS** (ESI) *m/z* Calcd for [C<sub>26</sub>H<sub>21</sub>Br<sub>6</sub>IN<sub>2</sub>O<sub>4</sub>, M+Na]<sup>+</sup>:

1048.5538, found 1048.5578.



## 5. General procedure of recycle experiments in oxidative dearomatization

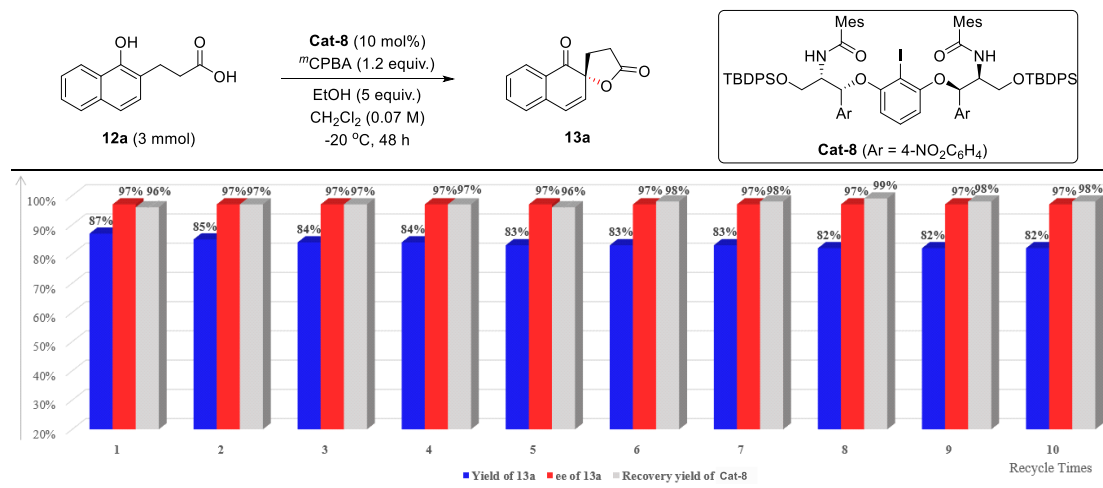

**Supplementary Figure 3.** Catalyst recovery and recycle experiments in oxidative dearomatization.

**General procedure:** To a Schlenk tube containing **Cat-8** (417.2 mg, 0.3 mmol, 10 mol%), *m*CPBA (732.7 mg, 3.6 mmol, 1.2 equiv.) and EtOH (0.873 ml, 5 equiv.) were added CH<sub>2</sub>Cl<sub>2</sub> (10 mL) and **12a** (648 mg, 3 mmol, 1.0 equiv.). At the end of each reaction of the cycle, the reaction mixture was quenched in the sequence of saturated Na<sub>2</sub>S<sub>2</sub>O<sub>3</sub> and NaHCO<sub>3</sub> aqueous solution. The organic layer was then extracted with dichloromethane, washed with brine, dried over anhydrous Na<sub>2</sub>SO<sub>4</sub>. The mixture was concentrated in vacuo, the residue was subsequently dissolved by 30 mL of MeOH, H<sub>2</sub>O (10 mL) was finally added to precipitate the catalyst which could enter the next cycle. The filtrate was concentrated in vacuo to get the crude product which could be further recrystallized by the mixture (10 mL, 1:300 volume ratio) of ethyl acetate and petroleum ether. After ten catalytic reactions, 320 mg of catalyst was obtained with a total recovery of 76.4%.

**Supplementary Table 5.** Data of recycle experiment.

| yield of <b>13a</b> | recovery yield of <b>Cat-8</b> | <i>ee</i> of <b>13a</b> |
|---------------------|--------------------------------|-------------------------|
| 87% (559 mg)        | 96% (402 mg)                   | 97%                     |
| 85% (545 mg)        | 97% (389 mg)                   | 97%                     |
| 84% (540 mg)        | 97% (377 mg)                   | 97%                     |
| 84% (539 mg)        | 97% (363 mg)                   | 97%                     |
| 83% (532 mg)        | 96% (350 mg)                   | 97%                     |
| 83% (532 mg)        | 98% (342 mg)                   | 97%                     |
| 83% (530 mg)        | 98% (335 mg)                   | 97%                     |
| 82% (527 mg)        | 99% (330 mg)                   | 97%                     |
| 82% (526 mg)        | 98% (325 mg)                   | 97%                     |
| 82% (526 mg)        | 98% (320 mg)                   | 97%                     |

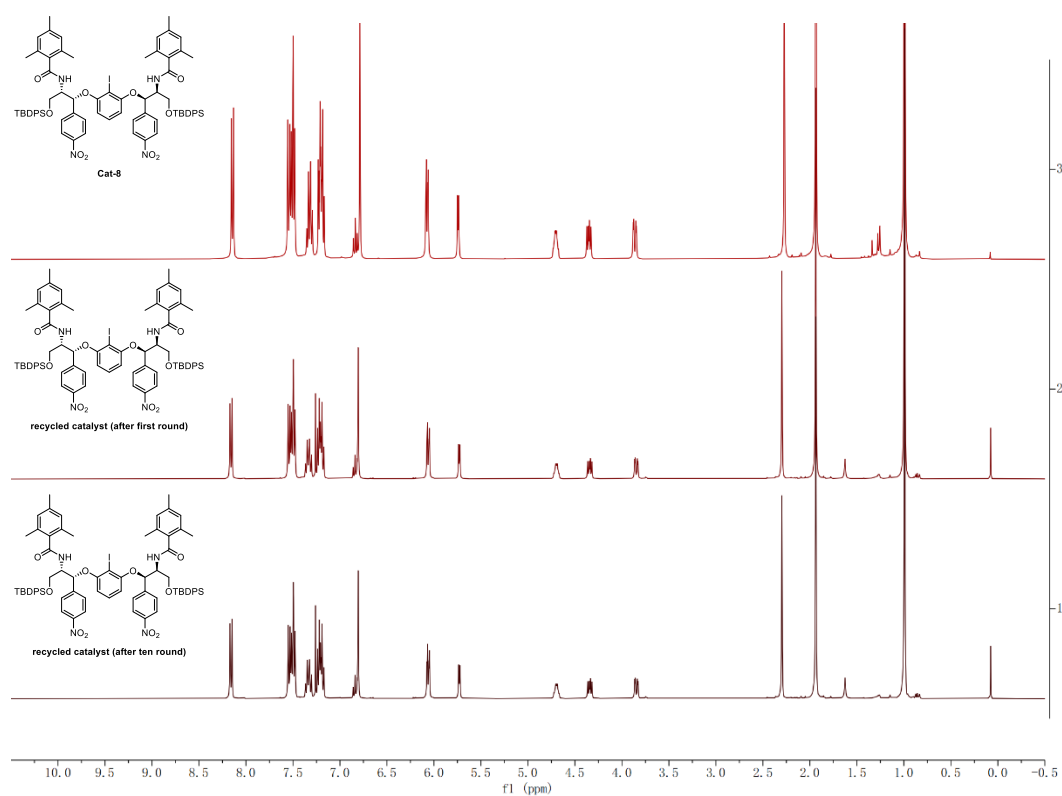

**Supplementary Figure 4.** Comparison of recovered catalyst

## 6. Gram scale operation

To a Schlenk tube containing **Cat-8** (487.2 mg, 0.35 mmol, 5 mol%), *m*CPBA (1.718 g, 8.3 mmol, 1.2 equiv.) and EtOH (2.0 mL, 5 equiv.) were added CH<sub>2</sub>Cl<sub>2</sub> (10 mL) and **12a** (1.512 g, 7 mmol, 1.0 equiv.). And the reaction was stirred at -20 °C for 48 h. The reaction mixture was quenched in the sequence of saturated Na<sub>2</sub>S<sub>2</sub>O<sub>3</sub> and NaHCO<sub>3</sub> aqueous solution. The organic layer was then extracted with dichloromethane, washed with brine, dried over anhydrous Na<sub>2</sub>SO<sub>4</sub>. The mixture was concentrated in vacuo, the residue was subsequently dissolved by 70 mL of MeOH, H<sub>2</sub>O (15 mL) was finally added to precipitate the catalyst (467 mg, 96% recovery yield). The product **13a** was obtained in 1.19g with 80% yield and 99% *ee* via recrystallization.

HPLC conditions: Chiralpak AS-H column, *n*-Hexane/*i*-PrOH = 85:15, flow rate = 1.0 mL/min, 30 °C, wavelength = 254 nm, *t*<sub>R</sub> = 38.642 min for major isomer, *t*<sub>R</sub> = 43.043 min for minor isomer

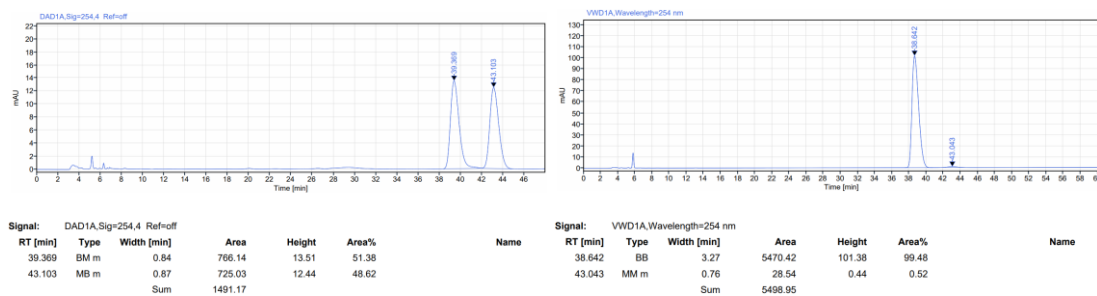

## 7. Spectra data of substrate.

### 7.1 Characterization of enantioselective oxidative dearomatization

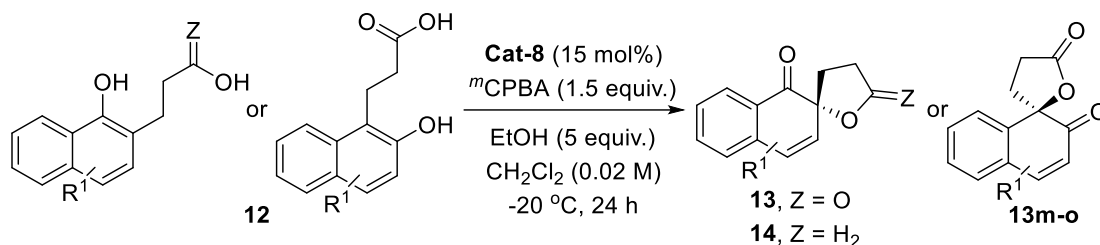

**General procedure:** To a Schlenk tube containing **Cat-8** (0.03 mmol, 15 mol%), *m*CPBA (0.3 mmol, 1.5 equiv.), and EtOH (1 mmol, 5 equiv.) were added CH<sub>2</sub>Cl<sub>2</sub> (10 mL) and **12** (0.2 mmol, 1.0 equiv.), the reaction mixture was stirred at 0 to -20 °C for 24 hours, which was then quenched in the sequence of saturated Na<sub>2</sub>S<sub>2</sub>O<sub>3</sub> and NaHCO<sub>3</sub> aqueous solution. The organic layer was subsequently extracted with dichloromethane, washed with brine, dried over anhydrous Na<sub>2</sub>SO<sub>4</sub>. Finally, the mixture was concentrated *in vacuo*, and then the residue was purified by silica gel column chromatography to afford the product **13**.

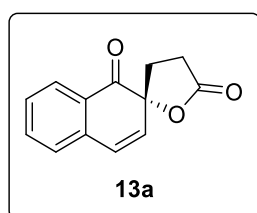

The reaction of 1-naphthol derivative **12a** (0.2 mmol, 1 equiv.), **Cat-8** (0.03 mmol, 15 mol%), EtOH (1 mmol, 5 equiv.) and *m*CPBA (0.3 mmol, 1.5 equiv.) were added to dry CH<sub>2</sub>Cl<sub>2</sub> at -20 °C for 24 h afforded compound **13a** (39.4 mg) in 92% yield as a white solid. The title compound **13a** was isolated through chromatography on silica gel eluting with petroleum ether/ethyl acetate (10/1 to 3/1). (*R<sub>f</sub>* = 0.5, petroleum ether/ethyl acetate = 3/1). **<sup>1</sup>H NMR** (400 MHz, CDCl<sub>3</sub>) δ 8.03 (d, *J* = 7.6 Hz, 1H), 7.65 (t, *J* = 7.4 Hz, 1H), 7.43 (t, *J* = 7.5 Hz, 1H), 7.29 (d, *J* = 7.6 Hz, 1H), 6.68 (d, *J* = 9.9 Hz, 1H), 6.23 (d, *J* = 9.9 Hz, 1H), 2.92 (ddd, *J* = 9.7, 11.2, 17.6 Hz, 1H), 2.62 (ddd, *J* = 2.0, 9.6, 17.6 Hz, 1H), 2.44 (ddd, *J* = 2.0, 9.6, 13.2 Hz, 1H), 2.22 (ddd, *J* = 9.8, 11.2, 13.2 Hz, 1H). **<sup>13</sup>C NMR** (100 MHz, CDCl<sub>3</sub>) δ 196.7, 176.7, 136.9, 135.8, 132.3,

129.0, 128.1, 128.0, 127.8, 127.4, 83.6, 31.3, 26.6. **HRMS** (ESI)  $m/z$  Calcd for  $[C_{13}H_{10}O_3, M + H]^+$ : 215.0703; Found: 215.0701.

**Optical Rotation:**  $[\alpha]_D^{25}$  186.2 ( $c = 1.0$ ,  $CHCl_3$ ). 98% *ee* (HPLC conditions: Chiralpak AS-H column, *n*-Hexane/*i*-PrOH = 85:15, flow rate = 1.0 mL/min, 30 °C, wavelength = 254 nm,  $t_R = 39.007$  min for major isomer,  $t_R = 43.250$  min for minor isomer)

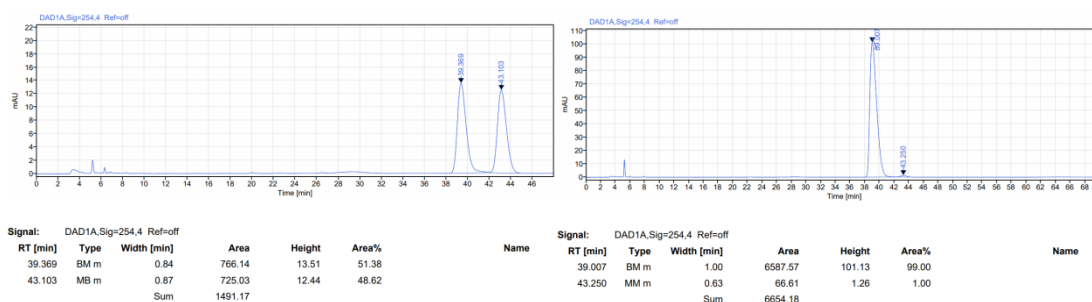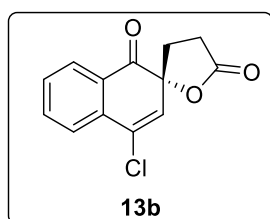

The reaction of 1-naphthol derivative **12b** (0.2 mmol, 1 equiv.), **Cat-8** (0.03 mmol, 15 mol%) and *m*CPBA (0.3 mmol, 1.5 equiv.) were added to dry  $CH_2Cl_2$  at  $-20$  °C for 24 h afforded compound **13a** (45.6 mg) in 92% yield as a white solid.

The title compound **13b** was isolated through chromatography on silica gel eluting with petroleum ether/ethyl acetate (10/1 to 3/1). ( $R_f = 0.5$ , petroleum ether/ethyl acetate = 3/1).  **$^1H$  NMR** (400 MHz,  $CDCl_3$ )  $\delta$  8.03 (d,  $J = 7.7$  Hz, 1H), 7.79-7.70 (m, 2H), 7.50 (m, 1H), 6.39 (s, 1H), 2.88 (ddd,  $J = 17.6, 11.2, 9.5$  Hz, 1H), 2.61 (ddd,  $J = 17.7, 9.6, 2.3$  Hz, 1H), 2.44 (ddd,  $J = 13.5, 9.6, 2.3$  Hz, 1H), 2.24 (ddd,  $J = 13.4, 11.1, 9.6$  Hz, 1H).  **$^{13}C$  NMR** (100 MHz,  $CDCl_3$ )  $\delta$  194.9, 176.0, 135.9, 134.6, 131.8, 130.2, 129.2, 128.1, 127.3, 126.2, 83.6, 31.5, 26.6. **HRMS** (ESI)  $m/z$  Calcd for  $[C_{13}H_9ClO_3, M + H]^+$ : 249.0313, 251.0289; Found: 249.0313, 251.0287.

**Optical Rotation:**  $[\alpha]_D^{25}$  101.1 ( $c = 1.0$ ,  $CHCl_3$ ). 98% *ee* (HPLC conditions: Chiralpak OD-H column, *n*-Hexane/*i*-PrOH = 85:15, flow rate = 1.0 mL/min, 30 °C, wavelength = 254 nm,  $t_R = 23.793$  min for major isomer,  $t_R = 30.546$  min for major isomer)

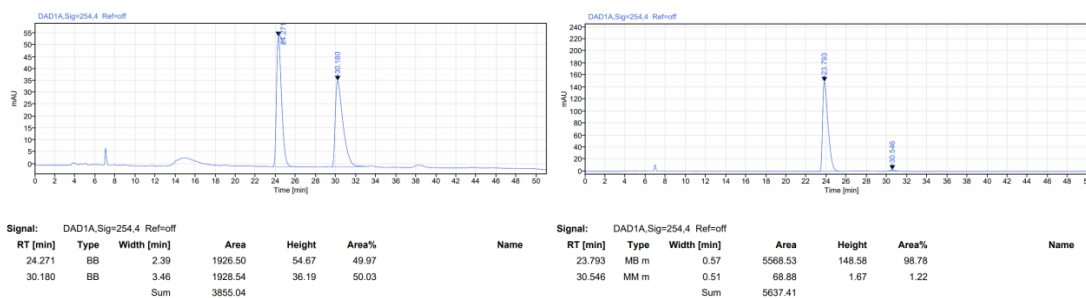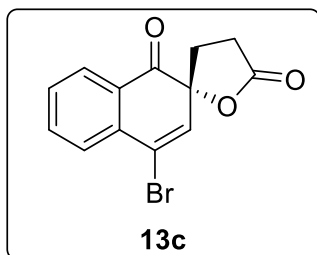

The reaction of 1-naphthol derivative **12c** (0.2 mmol, 1 equiv.), **Cat-8** (0.03 mmol, 15 mol%), EtOH (1 mmol, 5 equiv.) and *m*CPBA (0.3 mmol, 1.5 equiv.) were added to dry CH<sub>2</sub>Cl<sub>2</sub> at 0 °C for 24 h afforded compound **13c** (49.5 mg) in 85% yield as a white solid. The title

compound **13c** was isolated through chromatography on silica gel eluting with petroleum ether/ethyl acetate (10/1 to 3/1). (*R<sub>f</sub>* = 0.5, petroleum ether/ethyl acetate = 3/1). <sup>1</sup>H NMR (400 MHz, CDCl<sub>3</sub>) δ 8.01 (d, *J* = 7.6 Hz, 1H), 7.73 (d, *J* = 4.0 Hz, 2H), 7.59-7.41 (m, 1H), 6.66 (s, 1H), 2.87 (ddd, *J* = 17.6, 11.1, 9.6 Hz, 1H), 2.61 (ddd, *J* = 17.6, 9.6, 2.4 Hz, 1H), 2.45 (ddd, *J* = 13.3, 9.5, 2.4 Hz, 1H), 2.36-2.11 (m, 1H). <sup>13</sup>C NMR (100 MHz, CDCl<sub>3</sub>) δ = 194.9, 175.9, 136.0, 135.2, 133.5, 130.2, 128.9, 128.0, 127.4, 122.6, 84.4, 31.2, 26.5. HRMS (ESI) *m/z* Calcd for [C<sub>13</sub>H<sub>9</sub>O<sub>3</sub>Br, M + H]<sup>+</sup>: 292.9808, 294.9793; Found: 292.9804, 294.9786.

**Optical Rotation:** [α]<sub>D</sub><sup>25</sup> 95.7 (c = 1.0, CHCl<sub>3</sub>). 92% *ee* (HPLC conditions: Chiralpak OD-H column, *n*-Hexane/*i*-PrOH = 85:15, flow rate = 1.0 mL/min, 30 °C, wavelength = 254 nm, *t<sub>R</sub>* = 16.915 min for major isomer, *t<sub>R</sub>* = 19.048 min for minor isomer).

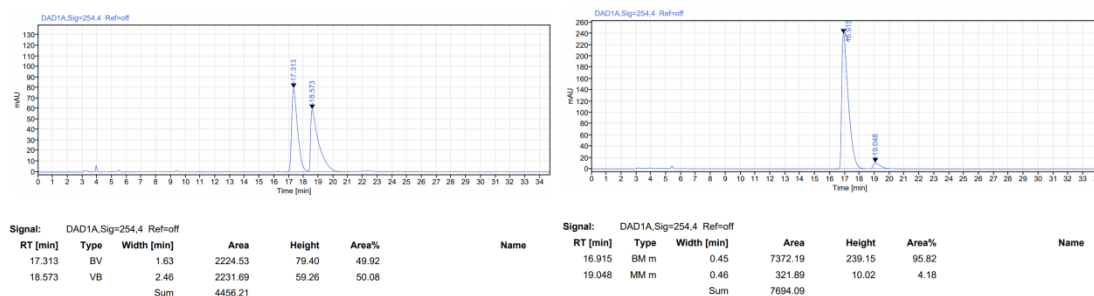

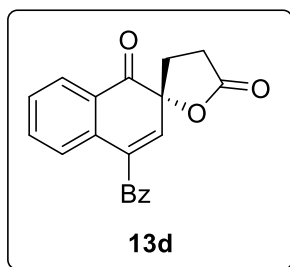

The reaction of 1-naphthol derivative **12d** (0.2 mmol, 1 equiv.), **Cat-8** (0.03 mmol, 15 mol%), EtOH (1 mmol, 5 equiv.) and *m*CPBA (0.3 mmol, 1.5 equiv.) were added to dry CH<sub>2</sub>Cl<sub>2</sub> at -20 °C for 24 h afforded compound **13a** (58.7 mg) in 92% yield as a white solid. The title compound **13d**

was isolated through chromatography on silica gel eluting with petroleum ether/ethyl acetate (10/1 to 2/1). (*R<sub>f</sub>* = 0.5, petroleum ether/ethyl acetate = 2/1). <sup>1</sup>H NMR (400 MHz, CDCl<sub>3</sub>) δ 8.09 (dd, *J* = 7.8, 1.5 Hz, 1H), 8.02-7.88 (m, 2H), 7.66-7.56 (m, 2H), 7.53-7.42 (m, 3H), 7.39 (d, *J* = 7.8 Hz, 1H), 6.38 (s, 1H), 2.89 (ddd, *J* = 17.6, 11.3, 9.6 Hz, 1H), 2.60 (ddd, *J* = 17.6, 9.6, 2.2 Hz, 1H), 2.51 (ddd, *J* = 13.5, 9.5, 2.2 Hz, 1H), 2.28 (ddd, *J* = 13.4, 11.3, 9.6 Hz, 1H). <sup>13</sup>C NMR (100 MHz, CDCl<sub>3</sub>) δ 195.4, 194.6, 176.0, 137.5, 136.1, 135.8, 134.4, 134.3, 134.2, 130.1, 129.9, 129.0, 128.5, 127.4, 127.0, 82.8, 31.2, 26.3. HRMS (ESI) *m/z* Calcd for [C<sub>20</sub>H<sub>14</sub>O<sub>4</sub>, M + H]<sup>+</sup>: 319.0965; Found: 319.0964.

**Optical Rotation:** [ $\alpha$ ]<sub>D</sub><sup>25</sup> -36.8 (*c* = 1.0, CHCl<sub>3</sub>). 85% *ee* (HPLC conditions: Chiralpak OD-H column, *n*-Hexane/*i*-PrOH = 85:15, flow rate = 1.0 mL/min, 30 °C, wavelength = 254 nm, *t<sub>R</sub>* = 30.062 min for major isomer, *t<sub>R</sub>* = 36.179 min for minor isomer).

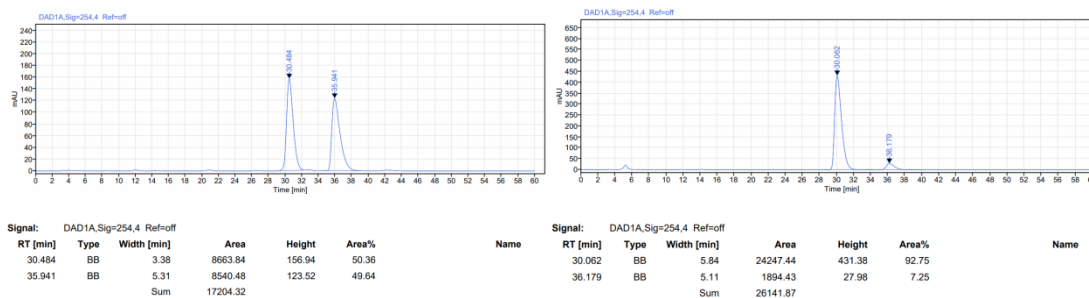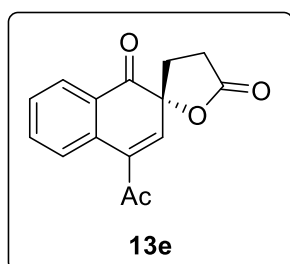

The reaction of 1-naphthol derivative **12e** (0.2 mmol, 1 equiv.), **Cat-8** (0.03 mmol, 15 mol%), EtOH (1 mmol, 5 equiv.) and *m*CPBA (0.3 mmol, 1.5 equiv.) were added to dry CH<sub>2</sub>Cl<sub>2</sub> at 0 °C for 80 h afforded compound **13e** (36.2 mg) in 71% yield as a white solid. The title compound **13e** was

isolated through chromatography on silica gel eluting with petroleum ether/ethyl

acetate (10/1 to 3/1). ( $R_f = 0.5$ , petroleum ether/ethyl acetate = 3/1).  $^1\text{H NMR}$  (400 MHz,  $\text{CDCl}_3$ )  $\delta$  8.03 (dd,  $J = 7.7, 1.6$  Hz, 1H), 7.91 (d,  $J = 8.0$  Hz, 1H), 7.65 (td,  $J = 7.7, 1.4$  Hz, 1H), 7.45 (t,  $J = 7.6$  Hz, 1H), 6.82 (s, 1H), 2.83 (ddd,  $J = 17.7, 11.4, 9.4$  Hz, 1H), 2.65-2.58 (m, 1H), 2.54 (s, 3H), 2.44 (ddd,  $J = 13.7, 9.3, 2.1$  Hz, 1H), 2.28 (ddd,  $J = 13.4, 11.5, 9.5$  Hz, 1H).  $^{13}\text{C NMR}$  (100 MHz,  $\text{CDCl}_3$ )  $\delta$  199.1, 195.2, 175.8, 137.3, 137.0, 135.7, 133.2, 129.7, 128.4, 127.7, 127.5, 83.3, 31.1, 29.0, 26.2. **HRMS** (ESI)  $m/z$  Calcd for  $[\text{C}_{15}\text{H}_{12}\text{O}_4, \text{M} + \text{H}]^+$ : 257.0807; Found: 257.0808.

**Optical Rotation:**  $[\alpha]_D^{25}$  180.1 ( $c = 1.0$ ,  $\text{CHCl}_3$ ). 94% *ee* (HPLC conditions: Chiralpak OD-H column, *n*-Hexane/*i*-PrOH = 85:15, flow rate = 1.0 mL/min, 30 °C, wavelength = 254 nm,  $t_R = 30.95$  min for minor isomer,  $t_R = 37.977$  min for major isomer).

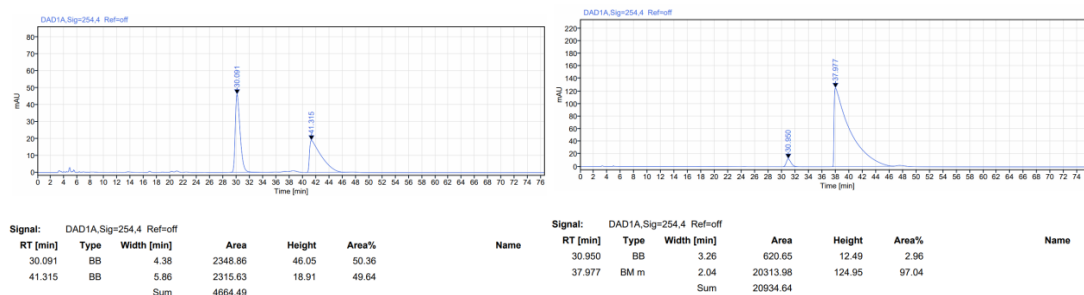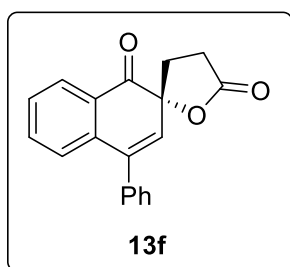

The reaction of 1-naphthol derivative **12f** (0.2 mmol, 1 equiv.), **Cat-8** (0.03 mmol, 15 mol%), EtOH (1 mmol, 5 equiv.) and *m*CPBA (0.3 mmol, 1.5 equiv.) were added to dry  $\text{CH}_2\text{Cl}_2$  at  $-20$  °C for 24 h afforded compound **13f** (34.8 mg) in 60% yield as a white solid. The title compound **13f** was isolated through chromatography on silica gel eluting with petroleum ether/ethyl acetate (10/1 to 3/1). ( $R_f = 0.5$ , petroleum ether/ethyl acetate = 3/1).  $^1\text{H NMR}$  (400 MHz,  $\text{CDCl}_3$ )  $\delta$  8.09 (dd,  $J = 7.7, 1.5$  Hz, 1H), 7.56 (td,  $J = 7.7, 1.5$  Hz, 1H), 7.48-7.41 (m, 4H), 7.35 (dd,  $J = 7.4, 2.2$  Hz, 2H), 7.16 (d,  $J = 7.8$  Hz, 1H), 6.12 (s, 1H), 2.92 (ddd,  $J = 17.6, 11.3, 9.6$  Hz, 1H), 2.63 (ddd,  $J = 17.6, 9.6, 2.2$  Hz, 1H), 2.53 (ddd,  $J = 13.4, 9.5, 2.2$  Hz, 1H), 2.28 (ddd,  $J = 13.4, 11.3, 9.6$  Hz, 1H).  $^{13}\text{C NMR}$  (100 MHz,  $\text{CDCl}_3$ )  $\delta$  196.6, 176.6, 140.0, 137.7, 137.5, 135.5, 130.7, 129.1, 128.9, 128.8,



128.6, 128.3, 127.7, 127.5, 83.9, 31.6, 26.9. **HRMS** (ESI)  $m/z$  Calcd for  $[C_{19}H_{14}O_3, M + H]^+$ : 291.1016; Found: 291.1015.

**Optical Rotation:**  $[\alpha]_D^{25}$  76 ( $c = 0.2$ ,  $CHCl_3$ ). 96% *ee* (HPLC conditions: Chiralpak OD-H column, *n*-Hexane/*i*-PrOH = 85:15, flow rate = 1.0 mL/min, 30 °C, wavelength = 254 nm,  $t_R = 18.103$  min for minor isomer,  $t_R = 29.030$  min for major isomer).

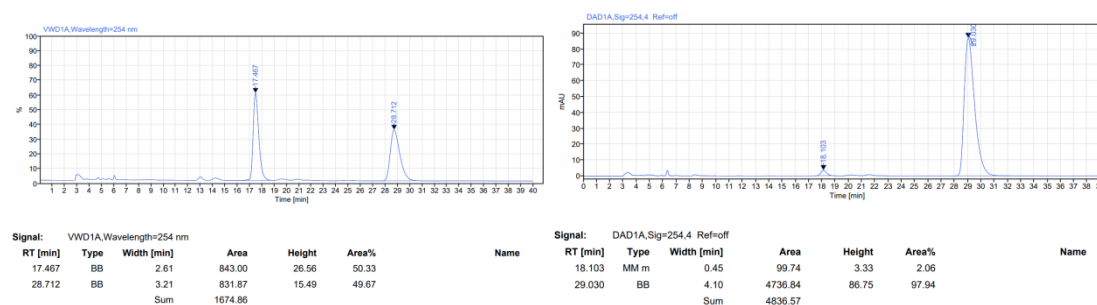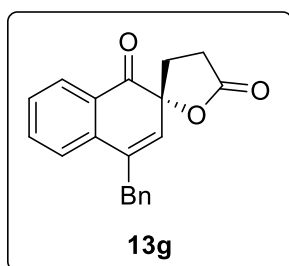

The reaction of 1-naphthol derivative **12g** (0.2 mmol, 1 equiv.), **Cat-8** (0.03 mmol, 15 mol%), EtOH (1 mmol, 5 equiv.) and *m*CPBA (0.3 mmol, 1.5 equiv.) were added to dry  $CH_2Cl_2$  at -20 °C for 24 h afforded compound **13g** (48.6 mg) in 80% yield as a white solid. The title compound **13g** was isolated through chromatography on silica gel eluting with petroleum ether/ethyl acetate (10/1 to 3/1). ( $R_f = 0.4$ , petroleum ether/ethyl acetate = 3/1).  **$^1H$  NMR** (400 MHz,  $CDCl_3$ )  $\delta$  7.96 (d,  $J = 7.7$  Hz, 1H), 7.51 (t,  $J = 7.7$  Hz, 1H), 7.31 (dd,  $J = 12.9, 7.2$  Hz, 2H), 7.24 (t,  $J = 7.5$  Hz, 2H), 7.17 (d,  $J = 7.5$  Hz, 3H), 5.82 (s, 1H), 3.81 (s, 2H), 2.79 (m, 1H), 2.48 (m, 1H), 2.36 (m, 1H), 2.18-2.03 (m, 1H).  **$^{13}C$  NMR** (100 MHz,  $CDCl_3$ )  $\delta$  196.7, 176.6, 137.5, 137.2, 135.9, 135.6, 130.9, 128.9, 128.9, 128.8, 128.1, 127.7, 126.9, 125.2, 83.8, 38.8, 31.6, 26.8. **HRMS** (ESI)  $m/z$  Calcd for  $[C_{20}H_{16}O_3, M + H]^+$ : 305.1172; Found: 305.1176.

**Optical Rotation:**  $[\alpha]_D^{25}$  104.2 ( $c = 1$ ,  $CHCl_3$ ). 96% *ee* (HPLC conditions: Chiralpak OD-H column, *n*-Hexane/*i*-PrOH = 85:15, flow rate = 1.0 mL/min, 30 °C, wavelength = 254 nm,  $t_R = 28.602$  min for major isomer,  $t_R = 51.283$  min for minor isomer).

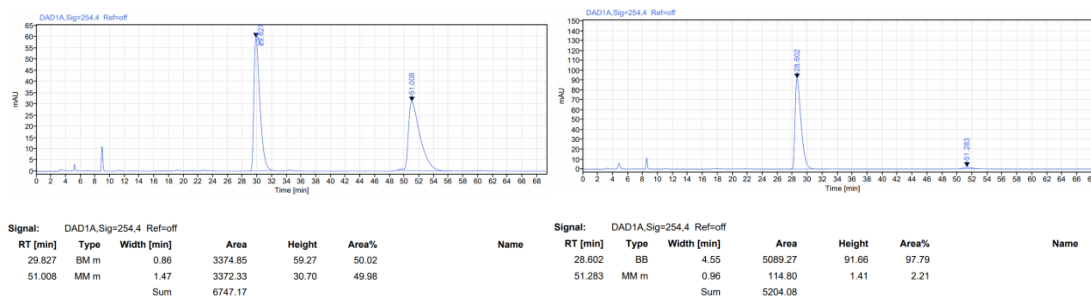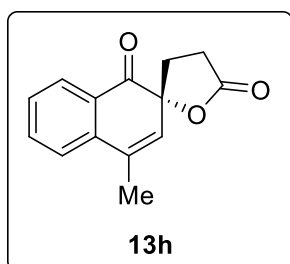

The reaction of 1-naphthol derivative **12h** (0.2 mmol, 1 equiv.), **Cat-8** (0.03 mmol, 15 mol%), EtOH (1 mmol, 5 equiv.) and <sup>m</sup>CPBA (0.3 mmol, 1.5 equiv.) were added to dry CH<sub>2</sub>Cl<sub>2</sub> at -20 °C for 24 h afforded compound **13h** (28.8 mg) in 63% yield as a white solid. The title compound **13h**

was isolated through chromatography on silica gel eluting with petroleum ether/ethyl acetate (10/1 to 3/1). (*R*<sub>f</sub> = 0.5, petroleum ether/ethyl acetate = 3/1). <sup>1</sup>H NMR (400 MHz, CDCl<sub>3</sub>) δ 8.02 (d, *J* = 7.6 Hz, 1H), 7.67 (td, *J* = 7.6, 1.6 Hz, 1H), 7.47-7.37 (m, 2H), 6.01 (s, 1H), 2.87 (ddd, *J* = 17.6, 11.2, 9.7 Hz, 1H), 2.57 (ddd, *J* = 17.6, 9.5, 1.9 Hz, 1H), 2.39 (ddd, *J* = 13.5, 9.6, 2.3 Hz, 1H), 2.18 (s, 3H), 2.22-2.08 (m, 1H). <sup>13</sup>C NMR (100 MHz, CDCl<sub>3</sub>) δ 196.9, 176.8, 138.0, 135.7, 133.2, 129.0, 128.8, 127.9, 127.4, 125.0, 83.7, 31.6, 26.9, 19.4. HRMS (ESI) *m/z* Calcd for [C<sub>14</sub>H<sub>12</sub>O<sub>3</sub>, M + H]<sup>+</sup>: 229.0859; Found: 229.0861.

**Optical Rotation:** [ $\alpha$ ]<sub>D</sub><sup>25</sup> 104.2 (*c* = 1, CHCl<sub>3</sub>). 93% *ee* (HPLC conditions: Chiralpak OD-H column, *n*-Hexane/*i*-PrOH = 85:15, flow rate = 1.0 mL/min, 30 °C, wavelength = 254 nm, *t*<sub>R</sub> = 20.420 min for minor isomer, *t*<sub>R</sub> = 23.698 min for major isomer).

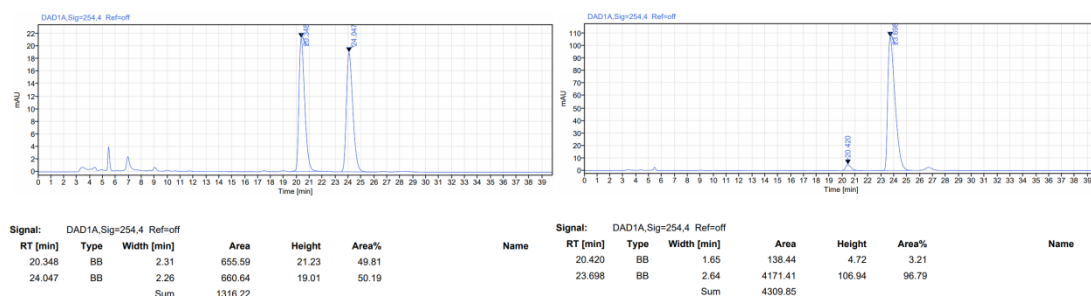

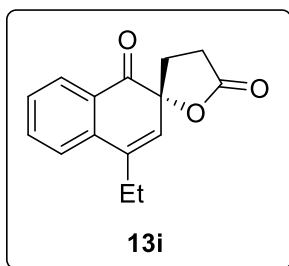

The reaction of 1-naphthol derivative **12i** (0.2 mmol, 1 equiv.), **Cat-8** (0.03 mmol, 15 mol%), EtOH (1 mmol, 5 equiv.) and *m*CPBA (0.3 mmol, 1.5 equiv.) were added to dry CH<sub>2</sub>Cl<sub>2</sub> at -20 °C for 24 h afforded compound **13i** (32.4 mg) in 92% yield as a white solid. The title compound **13i**

was isolated through chromatography on silica gel eluting with petroleum ether/ethyl acetate (10/1 to 3/1). (*R<sub>f</sub>* = 0.5, petroleum ether/ethyl acetate = 3/1). **<sup>1</sup>H NMR** (400 MHz, CDCl<sub>3</sub>) δ 8.02 (dd, *J* = 7.7, 0.9 Hz, 1H), 7.66 (td, *J* = 7.8, 1.2 Hz, 1H), 7.45 (d, *J* = 7.9 Hz, 1H), 7.40 (t, *J* = 7.5 Hz, 1H), 5.98 (s, 1H), 2.86 (ddd, *J* = 17.6, 11.3, 9.6 Hz, 1H), 2.62-2.52 (m, 3H), 2.39 (ddd, *J* = 13.2, 9.5, 1.9 Hz, 1H), 2.16 (ddd, *J* = 13.4, 11.4, 9.6 Hz, 1H), 1.23 (t, *J* = 7.4 Hz, 3H). **<sup>13</sup>C NMR** (100 MHz, CDCl<sub>3</sub>) δ = 197.0, 176.7, 138.3, 137.5, 135.6, 128.6, 128.1, 127.6, 127.2, 124.4, 83.9, 31.6, 26.9, 25.1, 12.4. **HRMS** (ESI) *m/z* Calcd for [C<sub>15</sub>H<sub>14</sub>O<sub>3</sub>, M + H]<sup>+</sup>: 243.1016; Found: 243.1016.

**Optical Rotation:** [ $\alpha$ ]<sub>D</sub><sup>25</sup> 176.6 (*c* = 1, CHCl<sub>3</sub>). 96% *ee* (HPLC conditions: Chiralpak OD-H column, *n*-Hexane/*i*-PrOH = 85:15, flow rate = 1.0 mL/min, 30 °C, wavelength = 254 nm, *t<sub>R</sub>* = 18.914 min for minor isomer, *t<sub>R</sub>* = 20.283 min for major isomer).

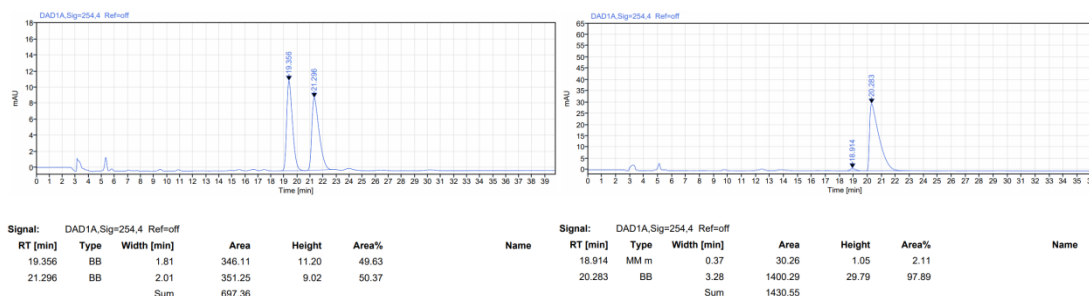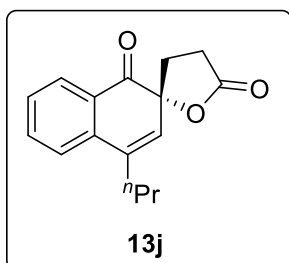

The reaction of 1-naphthol derivative **12j** (0.2 mmol, 1 equiv.), **Cat-8** (0.03 mmol, 15 mol%), EtOH (1 mmol, 5 equiv.) and *m*CPBA (0.3 mmol, 1.5 equiv.) were added to dry CH<sub>2</sub>Cl<sub>2</sub> at -20 °C for 24 h afforded compound **13j** (32.2 mg) in 63% yield as a white solid. The title compound **13j**

was isolated through chromatography on silica gel eluting with petroleum ether/ethyl acetate (10/1 to 3/1). (*R<sub>f</sub>* = 0.4, petroleum ether/ethyl acetate = 3/1). **<sup>1</sup>H NMR** (400 MHz, CDCl<sub>3</sub>) δ 8.01 (dd, *J* = 7.7, 1.5 Hz, 1H), 7.65 (td, *J* = 7.6, 1.5 Hz, 1H), 7.46-

7.34 (m, 2H), 5.97 (s 1H), 2.85 (ddd,  $J = 17.6, 11.4, 9.5$  Hz, 1H), 2.63-2.53 (m, 1H), 2.55-2.45 (m, 2H), 2.39 (ddd,  $J = 13.5, 9.5, 2.1$  Hz, 1H), 2.15 (ddd,  $J = 13.5, 11.4, 9.5$  Hz, 1H), 1.69-1.55 (m, 2H), 1.00 (t,  $J = 7.4$  Hz, 3H).  $^{13}\text{C NMR}$  (100 MHz,  $\text{CDCl}_3$ )  $\delta$  197.0, 176.7, 137.4, 136.8, 135.6, 128.6, 128.3, 128.1, 127.7, 124.7, 83.9, 34.3, 31.6, 26.8, 21.2, 14.0. **HRMS** (ESI)  $m/z$  Calcd for  $[\text{C}_{16}\text{H}_{16}\text{O}_3, \text{M} + \text{H}]^+$ : 257.1172; Found: 257.1175.

**Optical Rotation:**  $[\alpha]_{\text{D}}^{25}$  169.8 ( $c = 1.0, \text{CHCl}_3$ ). 94% *ee* (HPLC conditions: Chiralpak OD-H column, *n*-Hexane/*i*-PrOH = 85:15, flow rate = 1.0 mL/min, 30 °C, wavelength = 254 nm,  $t_{\text{R}} = 12.951$  min for minor isomer,  $t_{\text{R}} = 14.161$  min for major isomer).

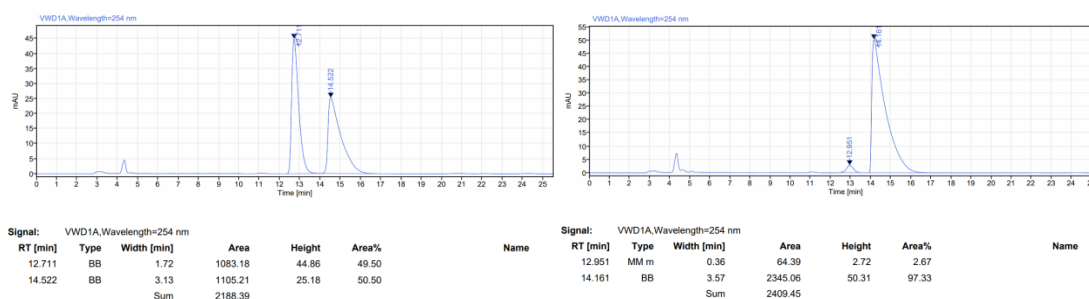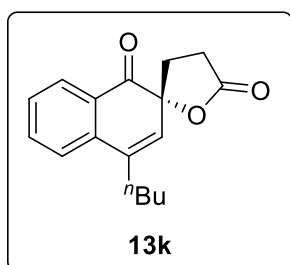

The reaction of 1-naphthol derivative **12k** (0.2 mmol, 1 equiv.), **Cat-8** (0.03 mmol, 15 mol%), EtOH (1 mmol, 5 equiv.) and *m*CPBA (0.3 mmol, 1.5 equiv.) were added to dry  $\text{CH}_2\text{Cl}_2$  at  $-20$  °C for 24 h afforded compound **13k** (32.9 mg) in 61% yield and as a white solid. The title compound **13k** was isolated through chromatography on silica gel eluting with petroleum ether/ethyl acetate (10/1 to 3/1). ( $R_f = 0.4$ , petroleum ether/ethyl acetate = 3/1).  $^1\text{H NMR}$  (400 MHz,  $\text{CDCl}_3$ )  $\delta$  8.01 (dd,  $J = 7.7, 1.5$  Hz, 1H), 7.65 (td,  $J = 7.6, 1.5$  Hz, 1H), 7.47-7.34 (m, 2H), 5.98 (s, 1H), 2.85 (ddd,  $J = 17.6, 11.4, 9.5$  Hz, 1H), 2.58 (td,  $J = 8.8, 8.0, 2.1$  Hz, 1H), 2.52 (ddd,  $J = 9.1, 5.3, 2.0$  Hz, 2H), 2.38 (ddd,  $J = 13.4, 9.5, 2.1$  Hz, 1H), 2.15 (ddd,  $J = 13.4, 11.4, 9.5$  Hz, 1H), 1.63-1.51 (m, 2H), 1.49-1.35 (m, 2H), 0.94 (t,  $J = 7.3$  Hz, 3H).  $^{13}\text{C NMR}$  (100 MHz,  $\text{CDCl}_3$ )  $\delta$  197.0, 176.7, 137.4, 137.1, 135.6, 128.6, 128.1, 128.1, 127.7, 124.7, 83.9, 32.0, 31.6, 30.2, 26.9, 22.6, 14.0. **HRMS** (ESI)  $m/z$  Calcd for  $[\text{C}_{17}\text{H}_{18}\text{O}_3, \text{M} + \text{H}]^+$ : 271.1328; Found: 271.1325.

**Optical Rotation:**  $[\alpha]_D^{25}$  160.6 ( $c = 1.0$ ,  $\text{CHCl}_3$ ). 96% *ee* (HPLC conditions: Chiralpak OD-H column, *n*-Hexane/*i*-PrOH = 85:15, flow rate = 1.0 mL/min, 30 °C, wavelength = 254 nm,  $t_R = 11.667$  min for minor isomer,  $t_R = 12.305$  min for major isomer).

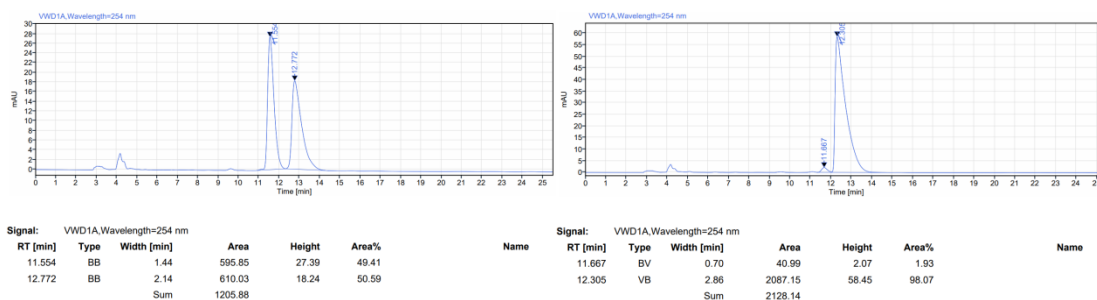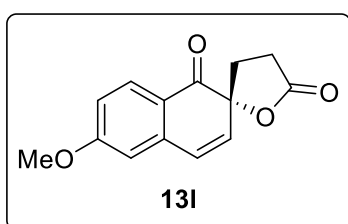

The reaction of 1-naphthol derivative **12I** (0.2 mmol, 1 equiv.), **Cat-8** (0.03 mmol, 15 mol%), EtOH (1 mmol, 5 equiv.) and *m*CPBA (0.3 mmol, 1.5 equiv.) were added to dry  $\text{CH}_2\text{Cl}_2$  at -20 °C for 24 h afforded compound **13I** (46.3 mg) in 95% yield as a white solid. The title compound **13I** was isolated through chromatography on silica gel eluting with petroleum ether/ethyl acetate (10/1 to 3/1). ( $R_f = 0.5$ , petroleum ether/ethyl acetate = 3/1).  $^1\text{H NMR}$  (400 MHz,  $\text{CDCl}_3$ )  $\delta$  7.98 (d,  $J = 8.6$  Hz, 1H), 6.88 (dd,  $J = 8.7, 2.5$  Hz, 1H), 6.70 (d,  $J = 2.5$  Hz, 1H), 6.59 (d,  $J = 9.9$  Hz, 1H), 6.20 (d,  $J = 9.9$  Hz, 1H), 3.89 (s, 3H), 2.93 (m, 1H), 2.58 (ddd,  $J = 17.6, 9.6, 2.1$  Hz, 1H), 2.39 (ddd,  $J = 12.2, 9.6, 2.2$  Hz, 1H), 2.16 (m, 1H).  $^{13}\text{C NMR}$  (100 MHz,  $\text{CDCl}_3$ )  $\delta$  195.0, 176.9, 165.7, 139.2, 133.4, 130.6, 128.0, 120.7, 114.5, 113.0, 83.1, 55.9, 31.7, 26.9. **HRMS** (ESI)  $m/z$  Calcd for  $[\text{C}_{14}\text{H}_{12}\text{O}_4, \text{M} + \text{H}]^+$ : 245.0808; Found: 245.0809.

**Optical Rotation:**  $[\alpha]_D^{25}$  138.3 ( $c = 1$ ,  $\text{CHCl}_3$ ). 97% *ee* (HPLC conditions: Chiralpak AD-H column, *n*-Hexane/*i*-PrOH = 75:25, flow rate = 1.0 mL/min, 30 °C, wavelength = 254 nm,  $t_R = 12.767$  min for minor isomer,  $t_R = 14.716$  min for major isomer).

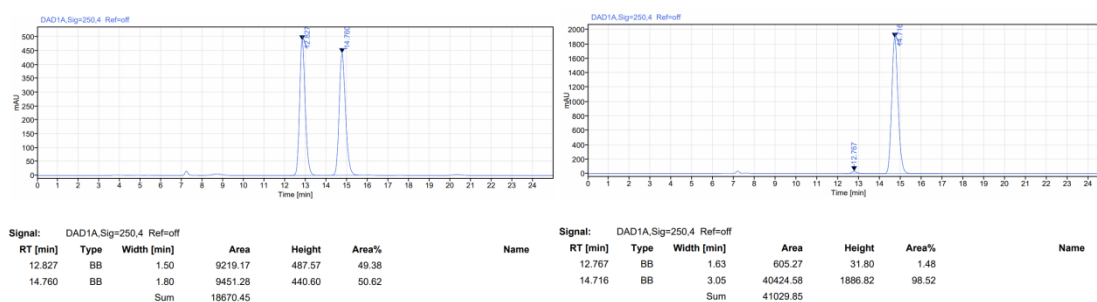

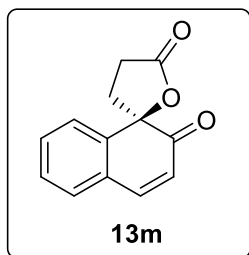

The reaction of 2-naphthol derivative **12m** (0.2 mmol, 1 equiv.), **Cat-8** (0.03 mmol, 15 mol%), HFIP (10 mmol, 50 equiv.) and *m*CPBA (0.3 mmol, 1.5 equiv.) were added to dry CH<sub>2</sub>Cl<sub>2</sub> at -20 °C for 24 h afforded compound **13m** (31.1 mg) in 73% yield as a white solid. The title compound **13m** was isolated through chromatography on silica gel eluting with petroleum ether/ethyl acetate (3/1 to 1/1). (*R*<sub>f</sub> = 0.5, petroleum ether/ethyl acetate = 1/1). <sup>1</sup>H NMR (400 MHz, CDCl<sub>3</sub>) δ 7.55 (d, *J* = 7.7 Hz, 1H), 7.47 (dd, *J* = 9.3, 6.7 Hz, 2H), 7.43-7.33 (m, 2H), 6.17 (d, *J* = 9.9 Hz, 1H), 2.84 (ddd, *J* = 17.1, 11.6, 9.3 Hz, 1H), 2.71-2.60 (m, 2H), 2.15 (ddd, *J* = 14.0, 11.6, 9.7 Hz, 1H). <sup>13</sup>C NMR (100 MHz, CDCl<sub>3</sub>) δ 197.7, 176.6, 146.2, 140.7, 131.2, 129.9, 129.3, 129.3, 125.9, 122.7, 86.0, 35.9, 26.7. HRMS (ESI) *m/z* Calcd for [C<sub>13</sub>H<sub>10</sub>O<sub>3</sub>, M + H]<sup>+</sup>: 215.0698; Found: 215.0703.

**Optical Rotation:** [ $\alpha$ ]<sub>D</sub><sup>25</sup> 264.2 (*c* = 1.0, CHCl<sub>3</sub>). 96% *ee* (HPLC conditions: Chiralpak OD-H column, *n*-Hexane/*i*-PrOH = 85:15, flow rate = 1.0 mL/min, 30 °C, wavelength = 254 nm, *t*<sub>R</sub> = 11.667 min for minor isomer, *t*<sub>R</sub> = 12.305 min for major isomer).

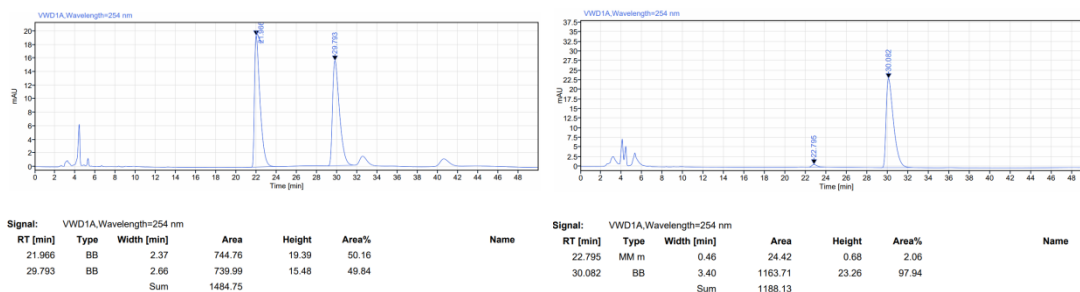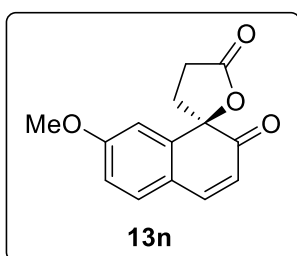

The reaction of 2-naphthol derivative **12n** (0.2 mmol, 1 equiv.), **Cat-8** (0.03 mmol, 15 mol%), HFIP (10 mmol, 50 equiv.) and *m*CPBA (0.3 mmol, 1.5 equiv.) were added to dry CH<sub>2</sub>Cl<sub>2</sub> at -20 °C for 24 h afforded compound **13n** (39.0 mg) in 80% yield as a white solid. The title compound **13n** was isolated through chromatography on silica gel eluting with petroleum ether/ethyl acetate (3/1 to 1/1). (*R*<sub>f</sub> = 0.5, petroleum ether/ethyl acetate = 1/1). <sup>1</sup>H NMR (400 MHz, CDCl<sub>3</sub>) δ 7.40 (d, *J* = 9.9 Hz, 1H), 7.24 (d, *J* = 2.7 Hz, 1H), 7.05 (d, *J* = 2.6 Hz, 1H), 6.85 (dd, *J* = 8.4, 2.6 Hz, 1H), 5.99 (d, *J* = 9.9 Hz, 1H), 3.83 (s, 3H), 2.80 (ddd, *J*

= 17.4, 11.7, 9.4 Hz, 1H), 2.66-2.57 (m, 2H), 2.11 (ddd,  $J = 13.8, 11.7, 9.6$  Hz, 1H).  $^{13}\text{C}$  NMR (100 MHz,  $\text{CDCl}_3$ )  $\delta$  197.6, 176.7, 162.3, 146.2, 143.1, 131.7, 122.3, 119.9, 114.5, 111.7, 86.1, 55.8, 36.2, 26.7. **HRMS** (ESI)  $m/z$  calcd for  $[\text{C}_{14}\text{H}_{12}\text{O}_4 + \text{H}]^+$ : 245.0814, found: 245.0808.

**Optical Rotation:**  $[\alpha]_D^{25}$  232.2 ( $c = 1.0$ ,  $\text{CHCl}_3$ ). 95% *ee* (HPLC conditions: Chiralpak OD-H column, *n*-Hexane/*i*-PrOH = 85:15, flow rate = 1.0 mL/min, 30 °C, wavelength = 254 nm,  $t_R = 28.241$  min for minor isomer,  $t_R = 32.807$  min for major isomer).

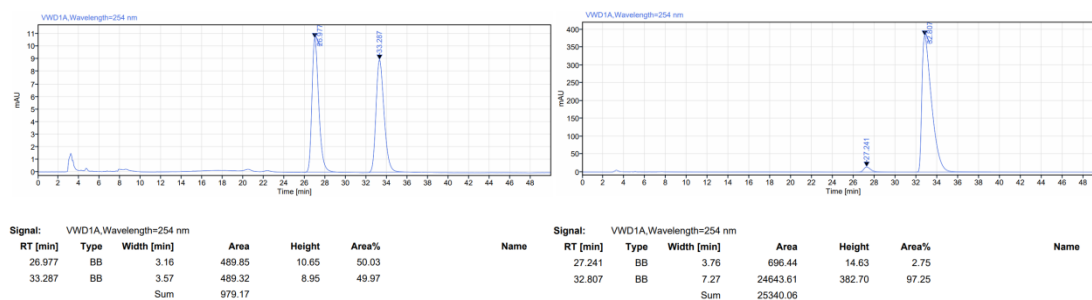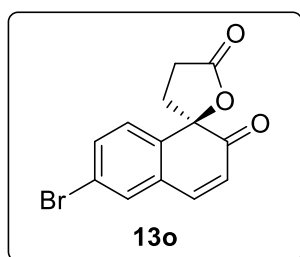

The reaction of 2-naphthol derivative **12o** (0.2 mmol, 1 equiv.), **Cat-8** (0.03 mmol, 15 mol%), HFIP (10 mmol, 50 equiv.) and *m*CPBA (0.3 mmol, 1.5 equiv.) were added to dry  $\text{CH}_2\text{Cl}_2$  at  $-20$  °C for 24 h afforded compound **13o** (39.0 mg) in 61% yield as a white solid. The title compound **13o**

was isolated through chromatography on silica gel eluting with petroleum ether/ethyl acetate (3/1 to 1/1). ( $R_f = 0.5$ , petroleum ether/ethyl acetate = 1/1).  $^1\text{H}$  NMR (400 MHz,  $\text{CDCl}_3$ )  $\delta$  7.58 (dd,  $J = 8.3, 2.0$  Hz, 1H), 7.49 (d,  $J = 2.0$  Hz, 1H), 7.45-7.37 (m, 2H), 6.20 (d,  $J = 10.0$  Hz, 1H), 2.82 (ddd,  $J = 16.9, 11.6, 9.0$  Hz, 1H), 2.68-2.59 (m, 2H), 2.11 (ddd,  $J = 14.3, 11.6, 9.7$  Hz, 1H).  $^{13}\text{C}$  NMR (100 MHz,  $\text{CDCl}_3$ )  $\delta$  196.9, 176.2, 144.5, 139.4, 133.8, 132.4, 131.1, 127.6, 123.9, 123.2, 85.5, 35.7, 26.6. **HRMS** (ESI)  $m/z$  calcd for  $[\text{C}_{13}\text{H}_9\text{BrO}_3 + \text{H}]^+$ : 292.9808, 294.9788; Found: 292.9803, 294.9784.

**Optical Rotation:**  $[\alpha]_D^{25}$  172.5 ( $c = 0.5$ ,  $\text{CHCl}_3$ ). 93% *ee* (HPLC conditions: Chiralpak OD-H column, *n*-Hexane/*i*-PrOH = 85:15, flow rate = 1.0 mL/min, 30 °C, wavelength = 254 nm,  $t_R = 25.737$  min for minor isomer,  $t_R = 32.325$  min for major isomer).

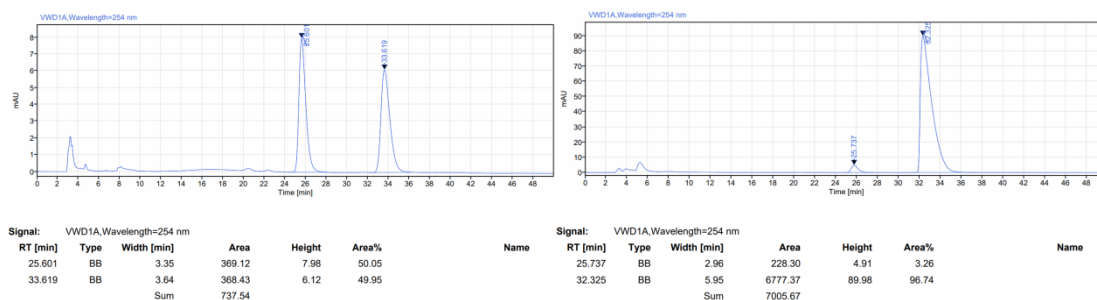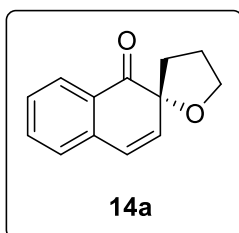

The reaction of 1-naphthol derivative (0.2 mmol, 1 equiv.), **Cat-8** (0.03 mmol, 15 mol%), EtOH (1 mmol, 5 equiv.) and *m*CPBA (0.3 mmol, 1.5 equiv.) were added to dry CH<sub>2</sub>Cl<sub>2</sub> at -20 °C for 16 h afforded compound **14a** (30.0 mg) in 76% yield as a white solid. The title compound **14a** was isolated through chromatography on silica gel eluting with petroleum ether/ethyl acetate (10/1 to 3/1). (*R<sub>f</sub>* = 0.6, petroleum ether/ethyl acetate = 3/1). <sup>1</sup>H NMR (400 MHz, CDCl<sub>3</sub>) δ 7.95 (dd, *J* = 7.8, 1.4 Hz, 1H), 7.53 (td, *J* = 7.5, 1.4 Hz, 1H), 7.32 (td, *J* = 7.6, 1.2 Hz, 1H), 7.17 (dd, *J* = 7.6, 1.1 Hz, 1H), 6.49 (d, *J* = 9.9 Hz, 1H), 6.16 (d, *J* = 9.9 Hz, 1H), 4.36-4.26 (m, 1H), 4.19-4.09 (m, 1H), 2.27-2.16 (m, 2H), 2.08-1.99 (m, 1H), 1.96-1.85 (m, 1H). <sup>13</sup>C NMR (100 MHz, CDCl<sub>3</sub>) δ 202.0, 137.5, 136.7, 134.8, 129.0, 128.1, 127.4, 127.2, 125.7, 84.3, 70.7, 36.6, 25.3. HRMS (ESI) *m/z* Calcd for [C<sub>13</sub>H<sub>12</sub>O<sub>2</sub>, M + H]<sup>+</sup>: 201.0910; Found: 201.0907.

**Optical Rotation:** [ $\alpha$ ]<sub>D</sub><sup>25</sup> 247.2 (*c* = 0.5, CHCl<sub>3</sub>). 96% *ee* (HPLC conditions: Chiralpak OD-H column, *n*-Hexane/*i*-PrOH = 85:15, flow rate = 1.0 mL/min, 30 °C, wavelength = 254 nm, *t<sub>R</sub>* = 6.749 min for major isomer, *t<sub>R</sub>* = 8.22 min for minor isomer).

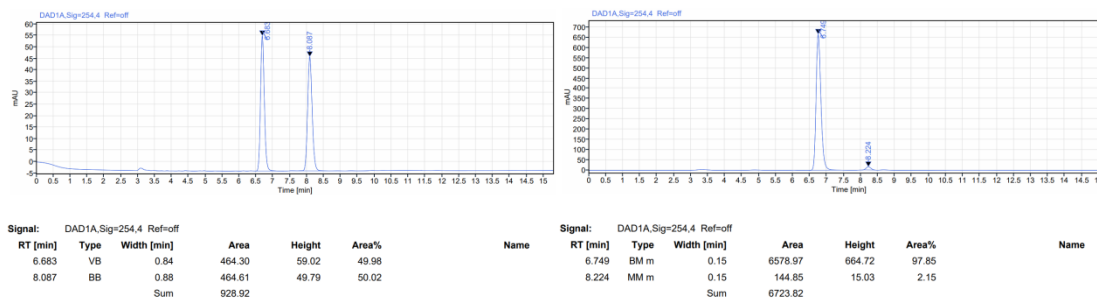



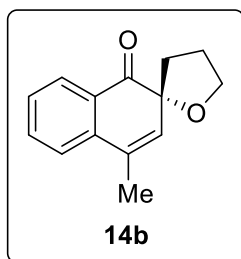

The reaction of 1-naphthol derivative (0.2 mmol, 1 equiv.), **Cat-8** (0.03 mmol, 15 mol%), EtOH (1 mmol, 5 equiv.) and *m*CPBA (0.3 mmol, 1.5 equiv.) were added to dry CH<sub>2</sub>Cl<sub>2</sub> at -20 °C for 16 h afforded compound **14b** (22.1 mg) in 52% yield as a solid. The title compound **14b** was isolated through chromatography on silica gel eluting with petroleum ether/ethyl acetate (10/1 to 3/1). (*R<sub>f</sub>* = 0.6, petroleum ether/ethyl acetate = 3/1). <sup>1</sup>H NMR (400 MHz, CDCl<sub>3</sub>) δ 7.97 (dd, *J* = 7.7, 1.5 Hz, 1H), 7.59 (td, *J* = 7.6, 1.5 Hz, 1H), 7.34 (td, *J* = 7.7, 6.3 Hz, 2H), 5.97 (s, 1H), 4.30-4.21 (m, 1H), 4.17-4.06 (m, 1H), 2.19 (ddd, *J* = 11.8, 7.7, 3.9 Hz, 2H), 2.12 (s, 3H), 2.07-1.99 (m, 1H), 1.92-1.82 (m, 1H). <sup>13</sup>C NMR (100 MHz, CDCl<sub>3</sub>) δ 202.1, 138.5, 134.7, 133.2, 130.6, 129.0, 127.9, 127.4, 124.4, 84.1, 70.4, 36.4, 25.4, 19.4. HRMS (ESI) *m/z* Calcd for [C<sub>14</sub>H<sub>14</sub>O<sub>2</sub>, M + H]<sup>+</sup>: 215.1067; Found: 215.1070.

**Optical Rotation:** [ $\alpha$ ]<sub>D</sub><sup>25</sup> 216.2 (*c* = 0.5, CHCl<sub>3</sub>). 90% *ee* (HPLC conditions: Chiralpak OD-H column, *n*-Hexane/*i*-PrOH = 85:15, flow rate = 1.0 mL/min, 30 °C, wavelength = 254 nm, *t<sub>R</sub>* = 6.880 min for major isomer, *t<sub>R</sub>* = 8.537 min for minor isomer).

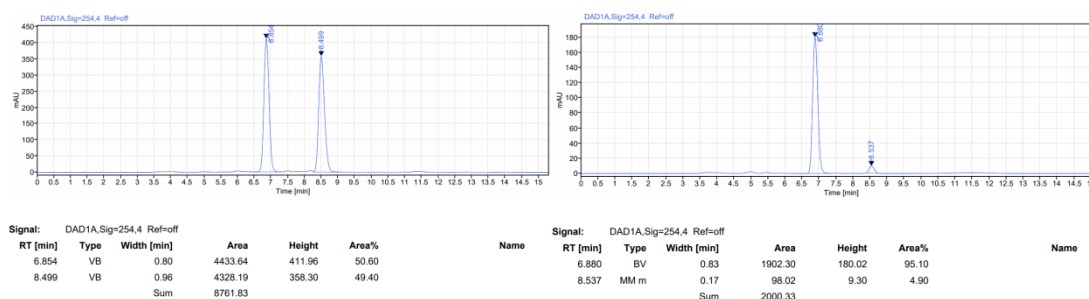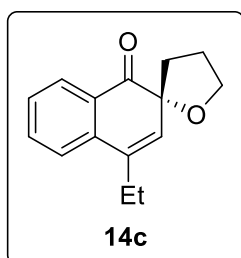

The reaction of 1-naphthol derivative (0.2 mmol, 1 equiv.), **Cat-8** (0.03 mmol, 15 mol%), EtOH (1 mmol, 5 equiv.) and *m*CPBA (0.3 mmol, 1.5 equiv.) were added to dry CH<sub>2</sub>Cl<sub>2</sub> at -20 °C for 16 h afforded compound **14c** (28.7 mg) in 63% yield as oil. The title compound **14c** was isolated through chromatography on silica gel eluting with petroleum ether/ethyl acetate (10/1 to 3/1). (*R<sub>f</sub>* = 0.6, petroleum ether/ethyl acetate = 3/1). <sup>1</sup>H NMR (400 MHz, CDCl<sub>3</sub>) δ 7.97 (dd, *J* = 7.7, 1.5 Hz, 1H), 7.58 (td, *J* = 7.6, 1.5 Hz, 1H), 7.39-7.31 (m, 2H), 5.96 (s,

1H), 4.32-4.25 (m, 1H), 4.17-4.11 (m, 1H), 2.55-2.47 (m, 2H), 2.24-2.16 (m, 2H), 2.07-1.99 (m, 1H), 1.91-1.83 (m, 1H), 1.21 (t,  $J = 7.4$  Hz, 3H).  $^{13}\text{C}$  NMR (100 MHz,  $\text{CDCl}_3$ )  $\delta$  202.3, 138.0, 135.9, 134.6, 131.3, 129.3, 127.8, 127.5, 123.9, 84.4, 70.5, 36.5, 25.3, 25.1, 12.6. HRMS (ESI)  $m/z$  Calcd for  $[\text{C}_{15}\text{H}_{16}\text{O}_2, \text{M} + \text{H}]^+$ : 229.1223; Found: 229.1225.

**Optical Rotation:**  $[\alpha]_{\text{D}}^{25}$  176.6 ( $c = 1$ ,  $\text{CHCl}_3$ ). 91% *ee* (HPLC conditions: Chiralpak OD-H column, *n*-Hexane/*i*-PrOH = 85:15, flow rate = 1.0 mL/min, 30 °C, wavelength = 254 nm,  $t_{\text{R}} = 5.463$  min for major isomer,  $t_{\text{R}} = 7.002$  min for minor isomer).

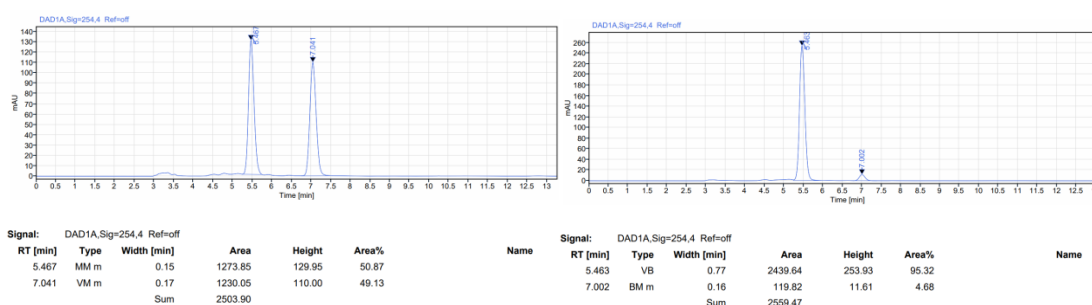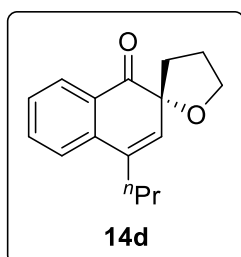

The reaction of 1-naphthol derivative (0.2 mmol, 1 equiv.), **Cat-8** (0.03 mmol, 15 mol%), EtOH (1 mmol, 5 equiv.) and *m*CPBA (0.3 mmol, 1.5 equiv.) were added to dry  $\text{CH}_2\text{Cl}_2$  at -20 °C for 16 h afforded compound **14c** (30.1 mg) in 64% yield as oil. The title compound **14c** was isolated through chromatography on silica gel eluting with petroleum ether/ethyl acetate (10/1 to 3/1). ( $R_{\text{f}} = 0.6$ , petroleum ether/ethyl acetate = 3/1).  $^1\text{H}$  NMR (400 MHz,  $\text{CDCl}_3$ )  $\delta$  7.97 (dd,  $J = 7.7, 1.5$  Hz, 1H), 7.57 (td,  $J = 7.6, 1.5$  Hz, 1H), 7.38-7.28 (m, 2H), 5.95 (s, 1H), 4.31-4.24 (m, 1H), 4.17-4.08 (m, 1H), 2.50-2.41 (m, 2H), 2.24-2.14 (m, 2H), 2.06-1.97 (m, 1H), 1.93-1.83 (m, 1H), 1.66-1.56 (m, 2H), 0.99 (t,  $J = 7.4$  Hz, 3H).  $^{13}\text{C}$  NMR (100 MHz,  $\text{CDCl}_3$ )  $\delta$  202.3, 137.9, 134.6, 134.3, 132.5, 129.3, 127.7, 127.5, 124.1, 84.4, 70.4, 36.6, 34.5, 25.3, 21.3, 14.1. HRMS (ESI)  $m/z$  Calcd for  $[\text{C}_{16}\text{H}_{18}\text{O}_2, \text{M} + \text{H}]^+$ : 243.1380; Found: 243.1381.

**Optical Rotation:**  $[\alpha]_D^{25}$  169.8 ( $c = 1.0$ ,  $\text{CHCl}_3$ ). 92% *ee* (HPLC conditions: Chiralpak OD-H column, *n*-Hexane/*i*-PrOH = 85:15, flow rate = 1.0 mL/min, 30 °C, wavelength = 254 nm,  $t_R = 4.875$  min for major isomer,  $t_R = 5.992$  min for minor isomer).

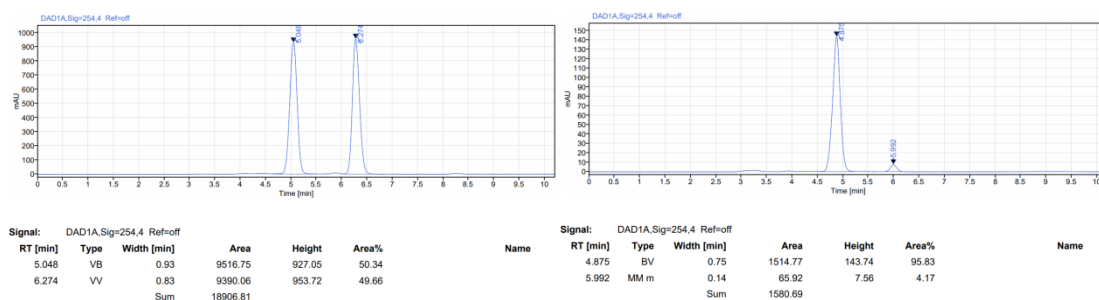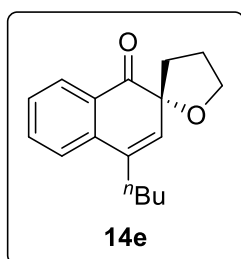

The reaction of 1-naphthol derivative (0.2 mmol, 1 equiv.), **Cat-8** (0.03 mmol, 15 mol%), EtOH (1 mmol, 5 equiv.) and *m*CPBA (0.3 mmol, 1.5 equiv.) were added to dry  $\text{CH}_2\text{Cl}_2$  at -20 °C for 16 h afforded compound **14e** (31.2 mg) in 61% yield as oil. The title compound **14e** was isolated through chromatography on silica gel eluting with petroleum ether/ethyl acetate (10/1 to 3/1). ( $R_f = 0.6$ , petroleum ether/ethyl acetate = 3/1).  **$^1\text{H}$  NMR** (400 MHz,  $\text{CDCl}_3$ )  $\delta$  7.97 (dd,  $J = 7.7, 1.5$  Hz, 1H), 7.57 (td,  $J = 7.6, 1.5$  Hz, 1H), 7.39-7.30 (m, 2H), 5.95 (s, 1H), 4.31-4.25 (m, 1H), 4.17-4.10 (m, 1H), 2.51-2.43 (m, 2H), 2.24-2.15 (m, 2H), 2.06-1.98 (m, 1H), 1.92-1.83 (m, 1H), 1.60-1.52 (m, 2H), 1.46-1.36 (m, 2H), 0.94 (t,  $J = 7.3$  Hz, 3H).  **$^{13}\text{C}$  NMR** (100 MHz,  $\text{CDCl}_3$ )  $\delta$  202.3, 137.9, 134.6, 134.6, 132.4, 129.4, 127.7, 127.5, 124.1, 84.4, 70.4, 36.6, 32.1, 30.4, 25.3, 22.7, 14.1. **HRMS** (ESI)  $m/z$  Calcd for  $[\text{C}_{15}\text{H}_{12}\text{O}_4, \text{M} + \text{H}]^+$ : 257.0807; Found: 257.0808.

**Optical Rotation:**  $[\alpha]_D^{25}$  176.4 ( $c = 0.5$ ,  $\text{CHCl}_3$ ). 88% *ee* (HPLC conditions: Chiralpak OD-H column, *n*-Hexane/*i*-PrOH = 85:15, flow rate = 1.0 mL/min, 30 °C, wavelength = 254 nm,  $t_R = 4.779$  min for major isomer,  $t_R = 6.044$  min for minor isomer).

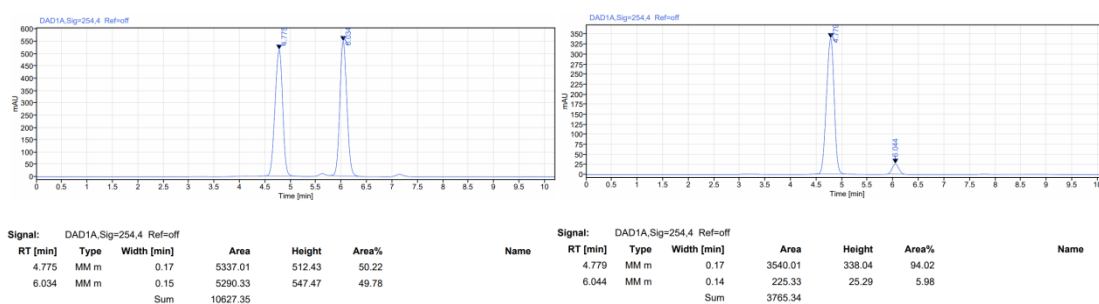

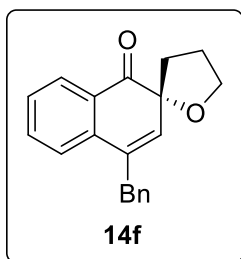

The reaction of 1-naphthol derivative (0.2 mmol, 1 equiv.), **Cat-8** (0.03 mmol, 15 mol%), EtOH (1 mmol, 5 equiv.) and <sup>m</sup>CPBA (0.3 mmol, 1.5 equiv.) were added to dry CH<sub>2</sub>Cl<sub>2</sub> at -20 °C for 16 h afforded compound **14f** (41.1 mg) in 71% yield as a solid. The title compound **14f** was isolated through chromatography on silica gel eluting with petroleum ether/ethyl acetate (10/1 to 3/1). (*R<sub>f</sub>* = 0.6, petroleum ether/ethyl acetate = 3/1). <sup>1</sup>H NMR (400 MHz, CDCl<sub>3</sub>) δ 7.99-7.87 (m, 1H), 7.43 (td, *J* = 7.6, 1.3 Hz, 1H), 7.28-7.14 (m, 7H), 5.91 (s, 1H), 4.25 (td, *J* = 7.7, 5.3 Hz, 1H), 4.12-4.03 (m, 1H), 3.79 (s, 2H), 2.25-2.10 (m, 2H), 2.04-1.94 (m, 1H), 1.92-1.81 (m, 1H). <sup>13</sup>C NMR (100 MHz, CDCl<sub>3</sub>) δ 202.0, 138.4, 137.6, 135.4, 134.6, 133.1, 129.3, 128.7, 128.7, 127.9, 127.5, 126.6, 124.8, 84.5, 70.6, 38.9, 36.7, 25.2. HRMS (ESI) *m/z* Calcd for [C<sub>20</sub>H<sub>18</sub>O<sub>2</sub>, M + H]<sup>+</sup>: 291.1380; Found: 291.1382. **Optical Rotation:** [ $\alpha$ ]<sub>D</sub><sup>25</sup> 136.0 (*c* = 1, CHCl<sub>3</sub>). 92% *ee* (HPLC conditions: Chiralpak OD-H column, *n*-Hexane/*i*-PrOH = 85:15, flow rate = 1.0 mL/min, 30 °C, wavelength = 254 nm, *t<sub>R</sub>* = 9.717 min for major isomer, *t<sub>R</sub>* = 10.845 min for minor isomer).

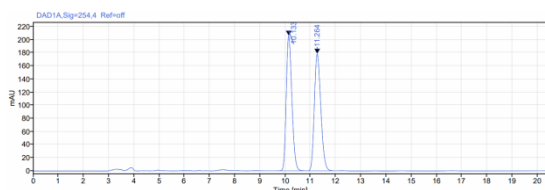

| RT [min] | Type | Width [min] | Area    | Height | Area% |
|----------|------|-------------|---------|--------|-------|
| 10.133   | BB   | 1.31        | 3202.88 | 205.56 | 50.08 |
| 11.264   | BB   | 1.15        | 3192.97 | 178.05 | 49.92 |
| Sum      |      |             | 6395.85 |        |       |

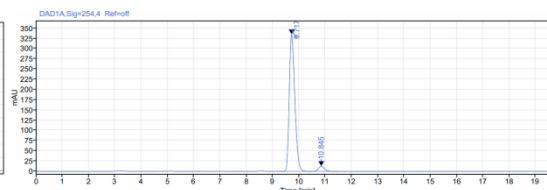

| Name | RT [min] | Type | Width [min] | Area    | Height | Area% | Name |
|------|----------|------|-------------|---------|--------|-------|------|
|      | 9.717    | BV   | 1.20        | 4937.78 | 334.51 | 95.94 |      |
|      | 10.845   | VB   | 0.98        | 208.98  | 12.41  | 4.06  |      |
| Sum  |          |      |             | 5146.76 |        |       |      |

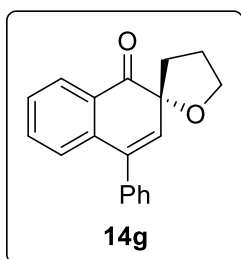

The reaction of 1-naphthol derivative (0.2 mmol, 1 equiv.), **Cat-8** (0.03 mmol, 15 mol%), EtOH (1 mmol, 5 equiv.) and <sup>m</sup>CPBA (0.3 mmol, 1.5 equiv.) were added to dry CH<sub>2</sub>Cl<sub>2</sub> at -20 °C for 16 h afforded compound **14g** (38.6 mg) in 70% yield as oil. The title compound **14g** was isolated through chromatography on silica gel eluting with petroleum ether/ethyl acetate (10/1 to 3/1). (*R<sub>f</sub>* = 0.6, petroleum ether/ethyl acetate = 3/1). <sup>1</sup>H NMR (400 MHz, CDCl<sub>3</sub>) δ 8.03 (dd, *J* = 7.7, 1.5 Hz, 1H), 7.51-7.33 (m, 7H), 7.09 (d, *J* = 7.8 Hz, 1H), 6.11 (s, 1H), 4.36-4.29 (m, 1H), 4.22-4.10 (m, 1H), 2.37-2.30 (m, 1H), 2.28-2.19 (m, 1H), 2.12-

1.97 (m, 2H).  $^{13}\text{C}$  NMR (100 MHz,  $\text{CDCl}_3$ )  $\delta$  201.8, 138.7, 137.9, 137.6, 135.2, 134.4, 129.3, 129.0, 128.6, 128.2, 128.0, 127.6, 126.8, 84.5, 70.6, 36.8, 25.5. **HRMS** (ESI)  $m/z$  Calcd for  $[\text{C}_{19}\text{H}_{16}\text{O}_2, \text{M} + \text{H}]^+$ : 277.1223; Found: 277.1223.

**Optical Rotation:**  $[\alpha]_{\text{D}}^{25}$  98.0 ( $c = 0.5$ ,  $\text{CHCl}_3$ ). 84% *ee* (HPLC conditions: Chiralpak OD-H column, *n*-Hexane/*i*-PrOH = 85:15, flow rate = 1.0 mL/min, 30 °C, wavelength = 254 nm,  $t_{\text{R}} = 5.887$  min for major isomer,  $t_{\text{R}} = 7.905$  min for minor isomer).

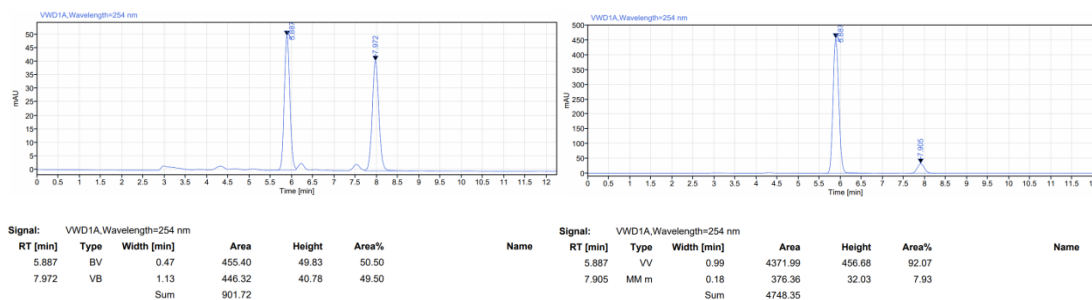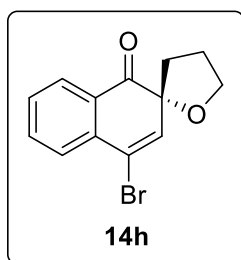

The reaction of 1-naphthol derivative (0.2 mmol, 1 equiv.), **Cat-8** (0.03 mmol, 15 mol%), EtOH (1 mmol, 5 equiv.) and *m*CPBA (0.3 mmol, 1.5 equiv.) were added to dry  $\text{CH}_2\text{Cl}_2$  at -20 °C for 16 h afforded compound **14h** (40.1 mg) in 74% yield as oil. The title compound **14h** was isolated through chromatography on silica gel eluting with petroleum ether/ethyl acetate (10/1 to 3/1). ( $R_{\text{f}} = 0.6$ , petroleum ether/ethyl acetate = 3/1).  $^1\text{H}$  NMR (400 MHz,  $\text{CDCl}_3$ )  $\delta$  7.97 (d,  $J = 8.3$  Hz, 1H), 7.71-7.61 (m, 2H), 7.48-7.36 (m, 1H), 6.62 (s, 1H), 4.32-4.22 (m, 1H), 4.19-4.08 (m, 1H), 2.31-2.13 (m, 2H), 2.13-1.91 (m, 2H).  $^{13}\text{C}$  NMR (100 MHz,  $\text{CDCl}_3$ )  $\delta$  199.8, 137.9, 135.7, 135.0, 129.4, 129.0, 128.2, 127.5, 119.8, 85.6, 70.8, 36.5, 25.4. **HRMS** (ESI)  $m/z$  Calcd for  $[\text{C}_{13}\text{H}_{11}\text{O}_2\text{Br}, \text{M} + \text{Na}]^+$ : 300.9840; Found: 300.9848.

**Optical Rotation:**  $[\alpha]_{\text{D}}^{25}$  137 ( $c = 0.5$ ,  $\text{CHCl}_3$ ). 94% *ee* (HPLC conditions: Chiralpak OD-H column, *n*-Hexane/*i*-PrOH = 85:15, flow rate = 1.0 mL/min, 30 °C, wavelength = 254 nm,  $t_{\text{R}} = 7.437$  min for major isomer,  $t_{\text{R}} = 8.982$  min for minor isomer).

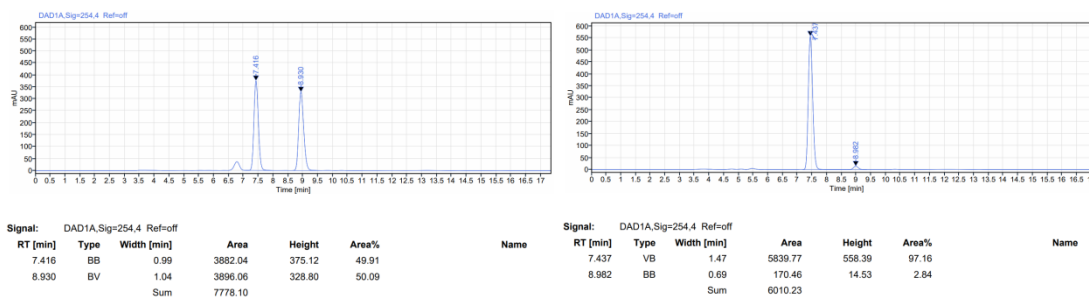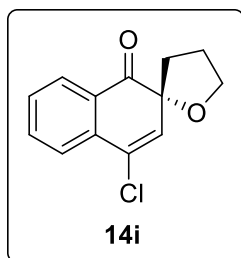

The reaction of 1-naphthol derivative (0.2 mmol, 1 equiv.), **Cat-8** (0.03 mmol, 15 mol%), EtOH (1 mmol, 5 equiv.) and *m*CPBA (0.3 mmol, 1.5 equiv.) were added to dry CH<sub>2</sub>Cl<sub>2</sub> at -20 °C for 16 h afforded compound **14i** (34.8 mg) in 74% yield as oil. The title compound **14i** was isolated through chromatography on silica gel eluting with petroleum ether/ethyl acetate (10/1 to 3/1). (*R<sub>f</sub>* = 0.6, petroleum ether/ethyl acetate = 3/1). <sup>1</sup>H NMR (400 MHz, CDCl<sub>3</sub>) δ 7.93 (d, *J* = 7.6 Hz, 1H), 7.66-7.55 (m, 2H), 7.37 (td, *J* = 7.3, 1.7 Hz, 1H), 6.28 (s, 1H), 4.20 (m, 1H), 4.12-4.03 (m, 1H), 2.16 (m, 2H), 2.00 (ddd, *J* = 16.0, 8.9, 3.6 Hz, 1H), 1.94-1.82 (m, 1H). <sup>13</sup>C NMR (100 MHz, CDCl<sub>3</sub>) δ 199.7, 135.0, 134.9, 133.4, 129.4, 129.1, 128.9, 127.5, 125.5, 84.7, 70.7, 36.6, 25.4. HRMS (ESI) *m/z* Calcd for [C<sub>13</sub>H<sub>11</sub>O<sub>2</sub>Cl, *M* + *H*]<sup>+</sup>: 235.0520; Found: 235.0508.

**Optical Rotation:** [ $\alpha$ ]<sub>D</sub><sup>25</sup> 110.5 (*c* = 0.5, CHCl<sub>3</sub>). 95% *ee* (HPLC conditions: Chiralpak OD-H column, *n*-Hexane/*i*-PrOH = 85:15, flow rate = 1.0 mL/min, 30 °C, wavelength = 254 nm, *t<sub>R</sub>* = 5.164 min for major isomer, *t<sub>R</sub>* = 6.914 min for minor isomer)

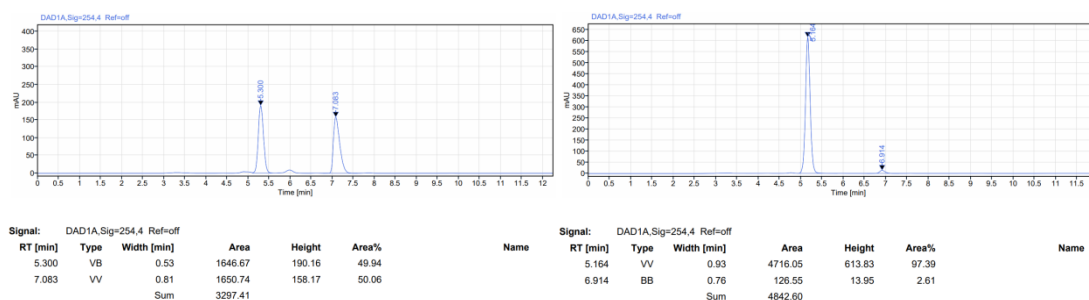

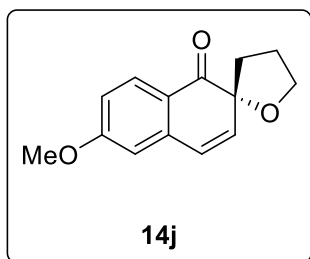

The reaction of 1-naphthol derivative (0.2 mmol, 1 equiv.), **Cat-8** (0.03 mmol, 15 mol%), EtOH (1 mmol, 5 equiv.) and *m*CPBA (0.3 mmol, 1.5 equiv.) were added to dry CH<sub>2</sub>Cl<sub>2</sub> at -20 °C for 16 h afforded compound **14j** (33.6 mg) in 73% yield as a white solid. The title compound **14j** was isolated through chromatography on silica gel eluting with petroleum ether/ethyl acetate (10/1 to 3/1). (*R*<sub>f</sub> = 0.6, petroleum ether/ethyl acetate = 3/1). <sup>1</sup>H NMR (400 MHz, CDCl<sub>3</sub>) δ 8.37 (d, *J* = 8.6 Hz, 1H), 7.25 (dd, *J* = 8.6, 2.5 Hz, 1H), 7.06 (d, *J* = 2.5 Hz, 1H), 6.87 (d, *J* = 9.8 Hz, 1H), 6.60 (d, *J* = 9.8 Hz, 1H), 4.78-4.67 (m, 1H), 4.62-4.51 (m, 1H), 4.29 (s, 3H), 2.73-2.59 (m, 2H), 2.51-2.41 (m, 1H), 2.39-2.25 (m, 1H). <sup>13</sup>C NMR (100 MHz, CDCl<sub>3</sub>) δ 200.4, 164.9, 139.7, 137.7, 129.9, 125.6, 122.4, 113.7, 112.1, 83.6, 70.8, 55.7, 37.0, 25.5. HRMS (ESI) *m/z* Calcd for [C<sub>14</sub>H<sub>14</sub>O<sub>3</sub>, M + H]<sup>+</sup>: 231.1016; Found: 231.1016.

**Optical Rotation:** [ $\alpha$ ]<sub>D</sub><sup>25</sup> 172.5 (c = 0.5, CHCl<sub>3</sub>). 94% *ee* (HPLC conditions: Chiralpak OD-H column, *n*-Hexane/*i*-PrOH = 85:15, flow rate = 1.0 mL/min, 30 °C, wavelength = 254 nm, *t*<sub>R</sub> = 9.820 min for major isomer, *t*<sub>R</sub> = 12.205 min for minor isomer).

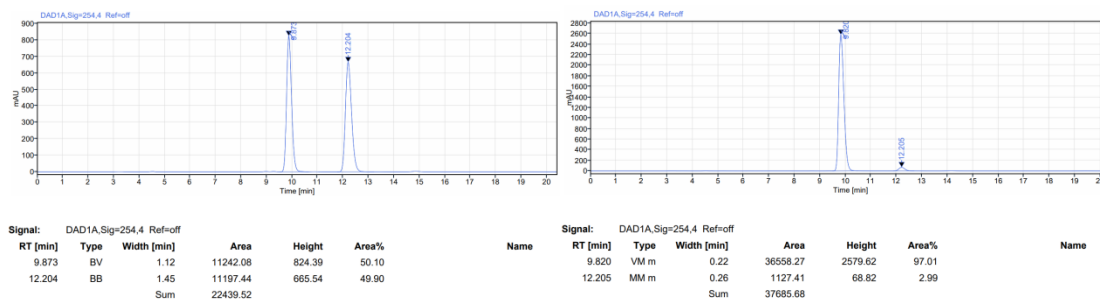

## 7.2 Characterization of oxidative spirocyclization

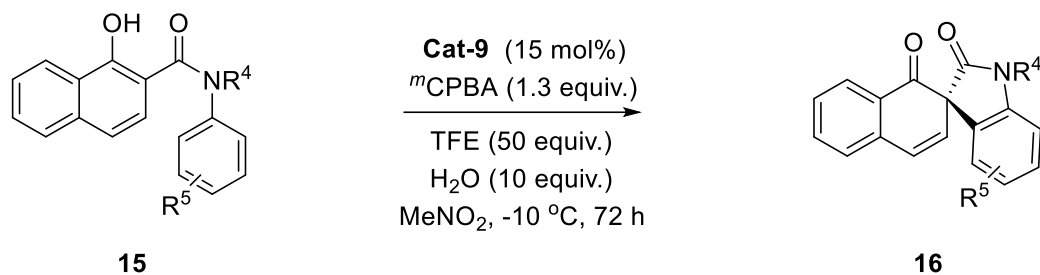

**General procedure:** To a Schlenk tube containing **Cat-9** (0.03 mmol, 15 mol%), *m*CPBA (0.26 mmol, 1.3 equiv.), TFE (10 mmol, 50 equiv.), H<sub>2</sub>O (2 mmol, 10 equiv.) and MeNO<sub>2</sub> (3 mL) were added **15** (0.2 mmol, 1.0 equiv.), the reaction mixture was stirred at -10 °C for 72 hours, which was then quenched in the sequence of saturated Na<sub>2</sub>S<sub>2</sub>O<sub>3</sub> and NaHCO<sub>3</sub> aqueous solution. Finally, the organic layer was subsequently extracted with ethyl acetate, washed with brine, dried over anhydrous Na<sub>2</sub>SO<sub>4</sub>. The mixture was concentrated *in vacuo*, and then the residue was purified by silica gel column chromatography to afford the product **16**.

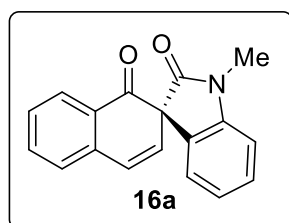

The reaction of the **15a** (55.4 mg, 0.2 mmol, 1.0 equiv.), *m*CPBA (52.9 mg, 0.26 mmol, 1.3 equiv.), **Cat-9** (42 mg, 0.03 mmol, 15 mol%), H<sub>2</sub>O (36.0 mg, 2.0 mmol, 10.0 equiv.), TFE (1.0g, 10 mmol, 50.0 equiv.) in MeNO<sub>2</sub> (dried, 3.0 mL) at -10 °C for 72 h afforded compound **16a** (29.7 mg) in 54% yield as a white solid. The title compound **16a** was isolated through chromatography on silica gel eluting with petroleum ether/ethyl acetate (5/1 to 2/1). (*R*<sub>f</sub> = 0.5, petroleum ether/ethyl acetate = 2/1). <sup>1</sup>H NMR (400 MHz, CDCl<sub>3</sub>) δ 7.98 (d, *J* = 7.8 Hz, 1H), 7.68-7.59 (m, 2H), 7.44-7.28 (m, 7H), 7.02-6.96 (m, 2H), 6.96-6.89 (m, 7H), 6.03 (d, *J* = 9.6 Hz, 2H), 3.28 (s, 7H); <sup>13</sup>C NMR (100 MHz, CDCl<sub>3</sub>) δ 194.2, 172.9, 145.0, 138.4, 135.5, 129.5, 129.3, 128.8, 128.7, 128.5, 128.2, 128.2, 127.8, 123.5, 123.2, 109.1, 64.5, 27.0., HRMS (ESI) *m/z* Calcd for [C<sub>18</sub>H<sub>13</sub>NO<sub>2</sub>, M + H]<sup>+</sup>:276.1019; Found: 276.1017.



**Optical Rotation:**  $[\alpha]_D^{25} -4.2$  ( $c = 1.0$ ,  $\text{CHCl}_3$ ). 95% *ee* (HPLC conditions: Chiralpak AD-H column, *n*-Hexane/*i*-PrOH = 70:30, flow rate = 1.0 mL/min, 30 °C, wavelength = 254 nm,  $t_R = 7.418$  min for minor isomer,  $t_R = 11.691$  min for major isomer).

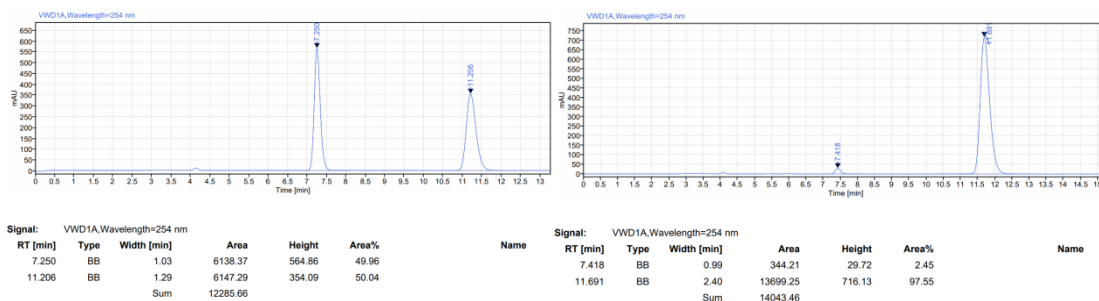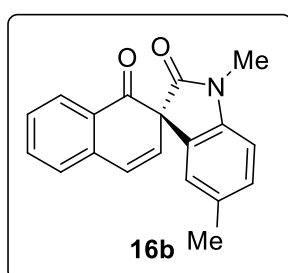

The reaction of the **15b** (58.2 mg, 0.2 mmol, 1.0 equiv.), *m*CPBA (52.9 mg, 0.26 mmol, 1.3 equiv.), **Cat-9** (42.0 mg, 0.03 mmol, 15 mol%),  $\text{H}_2\text{O}$  (36.0 mg, 2.0 mmol, 10.0 equiv.), TFE (1.0g, 10 mmol, 50.0 equiv.) in  $\text{MeNO}_2$  (dried, 3.0 mL) at -10 °C for 72 h afforded compound **16b** (34.68 mg) in

60% yield as a white solid. The title compound **16b** was isolated through chromatography on silica gel eluting with petroleum ether/ethyl acetate (5/1 to 2/1). ( $R_f = 0.5$ , petroleum ether/ethyl acetate = 2/1).  $^1\text{H NMR}$  (400 MHz,  $\text{CDCl}_3$ )  $\delta$  8.00 (d,  $J = 7.7$  Hz, 1H), 7.68-7.60 (m, 1H), 7.44-7.33 (m, 2H), 7.16-7.09 (m, 1H), 6.91 (d,  $J = 9.6$  Hz, 1H), 6.81 (d,  $J = 8.0$  Hz, 1H), 6.75 (s, 1H), 6.02 (d,  $J = 9.6$  Hz, 1H), 3.26 (s, 3H), 2.24 (s, 3H);  $^{13}\text{C NMR}$  (100 MHz,  $\text{CDCl}_3$ )  $\delta$  194.4, 172.8, 142.6, 138.5, 135.4, 132.9, 129.8, 129.5, 128.8, 128.8, 128.5, 128.2, 128.0, 127.8, 124.3, 108.9, 64.6, 27.1, 21.1., **HRMS** (ESI)  $m/z$  Calcd for  $[\text{C}_{19}\text{H}_{15}\text{NO}_2, \text{M}+\text{H}]^+$ : 290.1176, found 290.1175.

**Optical Rotation:**  $[\alpha]_D^{25} 54.9$  ( $c = 1.0$ ,  $\text{CHCl}_3$ ). 94% *ee* (HPLC conditions: Chiralpak AD-H column, *n*-Hexane/*i*-PrOH = 70:30, flow rate = 1.0 mL/min, 30 °C, wavelength = 254 nm,  $t_R = 6.351$  min for minor isomer,  $t_R = 9.763$  min for major isomer).

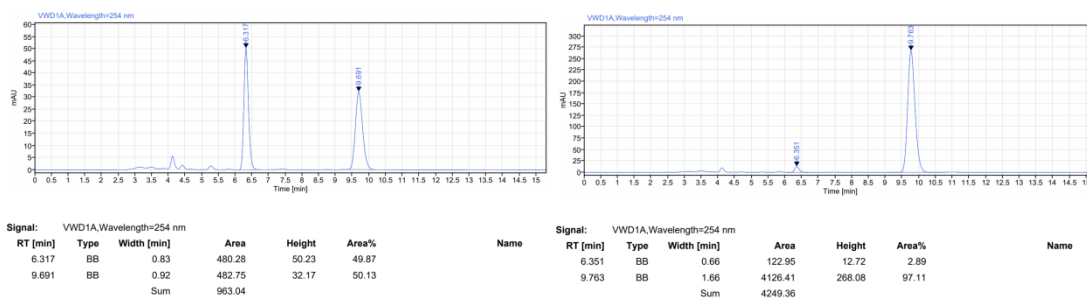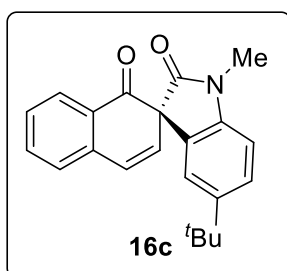

The reaction of the **15c** (66.6 mg, 0.2 mmol, 1.0 equiv.), *m*CPBA (52.9 mg, 0.26 mmol, 1.3 equiv.), **Cat-9** (42.0 mg, 0.03 mmol, 15 mol%), H<sub>2</sub>O (36.0 mg, 2.0 mmol, 10.0 equiv.), TFE (1.0g, 10 mmol, 50.0 equiv.) in MeNO<sub>2</sub> (dried, 3.0 mL) at -10 °C for 72 h afforded compound **16c** (42.3 mg) in 64%

yield as a white solid. The title compound **16c** was isolated through chromatography on silica gel eluting with petroleum ether/ethyl acetate (5/1 to 2/1). (*R*<sub>f</sub> = 0.5, petroleum ether/ethyl acetate = 2/1). <sup>1</sup>H NMR (400 MHz, CDCl<sub>3</sub>) δ 8.01 (d, *J* = 7.7 Hz, 1H), 7.69-7.61 (m, 1H), 7.41-7.33 (m, 3H), 6.97-6.89 (m, 2H), 6.85 (d, *J* = 8.3 Hz, 1H), 6.03 (d, *J* = 9.6 Hz, 1H), 3.26 (s, 3H), 1.22 (s, 9H).; <sup>13</sup>C NMR (100 MHz, CDCl<sub>3</sub>) δ 194.4, 172.8, 146.6, 142.6, 138.5, 135.5, 129.7, 128.8, 128.8, 128.6, 128.2, 128.2, 127.9, 126.2, 120.7, 108.6, 64.9, 34.7, 31.6, 27.1., **HRMS** (ESI) *m/z* Calcd for [C<sub>22</sub>H<sub>21</sub>NO<sub>2</sub>, M+H]<sup>+</sup>: 332.1646, found 332.1648.

**Optical Rotation:** [ $\alpha$ ]<sub>D</sub><sup>25</sup> 88.6 (*c* = 0.5, CHCl<sub>3</sub>). 94% *ee* (HPLC conditions: Chiralpak AD-H column, *n*-Hexane/*i*-PrOH = 70:30, flow rate = 1.0 mL/min, 30 °C, wavelength = 254 nm, *t*<sub>R</sub> = 4.505 min for minor isomer, *t*<sub>R</sub> = 8.360 min for major isomer).

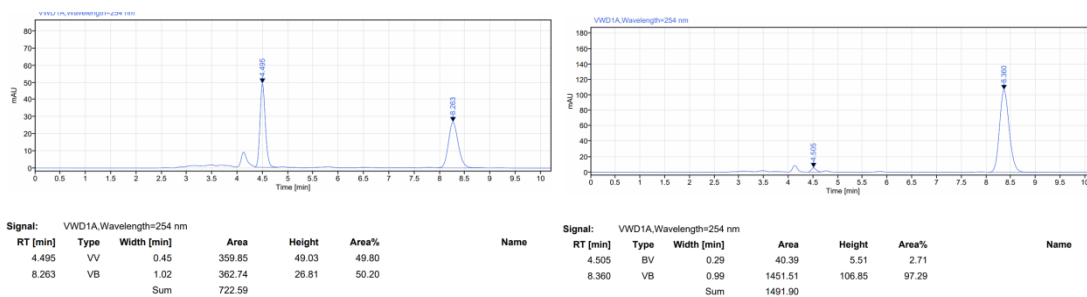

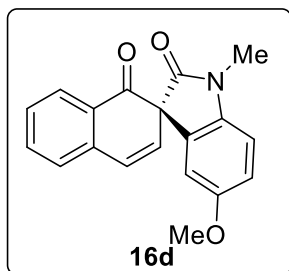

The reaction of the **15d** (61.4 mg, 0.2 mmol, 1.0 equiv.), *m*CPBA (52.9 mg, 0.26 mmol, 1.3 equiv.), **Cat-9** (42.0 mg, 0.03 mmol, 15 mol%), H<sub>2</sub>O (36.0 mg, 2.0 mmol, 10.0 equiv.), TFE (1.0g, 10 mmol, 50.0 equiv.) in MeNO<sub>2</sub> (dried, 3.0 mL) at -10 °C for 72 h afforded compound **16d** (45.14 mg) in

74% yield as a white solid. The title compound **16d** was isolated through chromatography on silica gel eluting with petroleum ether/ethyl acetate (5/1 to 2/1). (*R<sub>f</sub>* = 0.5, petroleum ether/ethyl acetate = 2/1). <sup>1</sup>H NMR (400 MHz, CDCl<sub>3</sub>) δ 7.99 (dd, *J* = 7.8, 1.4 Hz, 1H), 7.66-7.62 (m, 1H), 7.44-7.32 (m, 2H), 6.91 (d, *J* = 9.6 Hz, 1H), 6.88-6.77 (m, 2H), 6.56 (d, *J* = 2.3 Hz, 1H), 6.02 (d, *J* = 9.6 Hz, 1H), 3.69 (s, 3H), 3.25 (s, 3H); <sup>13</sup>C NMR (100 MHz, CDCl<sub>3</sub>) δ 194.2, 172.5, 156.3, 138.4, 138.4, 135.5, 130.0, 129.4, 128.9, 128.5, 128.2, 128.2, 127.9, 113.7, 111.0, 109.4, 64.9, 55.9, 27.2., HRMS (ESI) *m/z* Calcd for [C<sub>19</sub>H<sub>15</sub>NO<sub>3</sub>, M+H]<sup>+</sup> :306.1125, found 306.1125.

**Optical Rotation:** [ $\alpha$ ]<sub>D</sub><sup>25</sup> 57 (c = 1, CHCl<sub>3</sub>). 92% *ee* (HPLC conditions: Chiralpak AD-H column, *n*-Hexane/*i*-PrOH = 70:30, flow rate = 1.0 mL/min, 30 °C, wavelength = 254 nm, *t<sub>R</sub>* = 8.641 min for minor isomer, *t<sub>R</sub>* = 15.589 min for major isomer).

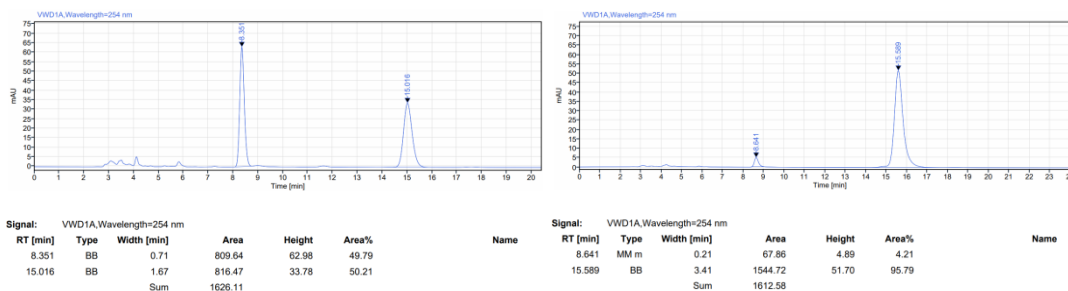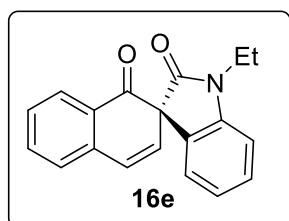

The reaction of the **15e** (58.2 mg, 0.2 mmol, 1.0 equiv.), *m*CPBA (52.9 mg, 0.26 mmol, 1.3 equiv.), **Cat-9** (42.0 mg, 0.03 mmol, 15 mol%), H<sub>2</sub>O (36.0 mg, 2.0 mmol, 10.0 equiv.), TFE (1.0g, 10 mmol, 50.0 equiv.) in MeNO<sub>2</sub> (dry, 3.0 ml) at

-10 °C for 72 h afforded compound **16e** (31.2 mg) in 54% yield as oil. The title compound **16e** was isolated through chromatography on silica gel eluting with

petroleum ether/ethyl acetate (5/1 to 2/1). ( $R_f = 0.5$ , petroleum ether/ethyl acetate = 2/1).  **$^1\text{H NMR}$**  (400 MHz,  $\text{CDCl}_3$ )  $\delta$  7.98 (d,  $J = 9.2$  Hz, 1H), 7.68-7.60 (m, 1H), 7.42-7.29 (m, 3H), 7.02-6.87 (m, 4H), 6.04 (d,  $J = 9.6$  Hz, 1H), 3.91-3.74 (m, 2H), 1.33 (t,  $J = 7.2$  Hz, 3H).;  **$^{13}\text{C NMR}$**  (100 MHz,  $\text{CDCl}_3$ )  $\delta$  194.2, 172.6, 144.1, 138.4, 135.4, 129.5, 129.4, 129.0, 128.8, 128.8, 128.5, 128.2, 127.8, 123.7, 123.0, 109.3, 64.5, 35.6, 12.7., **HRMS** (ESI)  $m/z$  Calcd for  $[\text{C}_{19}\text{H}_{15}\text{NO}_2, \text{M}+\text{H}]^+$ : 290.1176, found 290.1178.

**Optical Rotation:**  $[\alpha]_D^{25} -14.7$  ( $c = 0.5$ ,  $\text{CHCl}_3$ ). 95% *ee* (HPLC conditions: Chiralpak AD-H column, *n*-Hexane/*i*-PrOH = 70:30, flow rate = 1.0 mL/min, 30 °C, wavelength = 254 nm,  $t_R = 7.225$  min for minor isomer,  $t_R = 10.946$  min for major isomer).

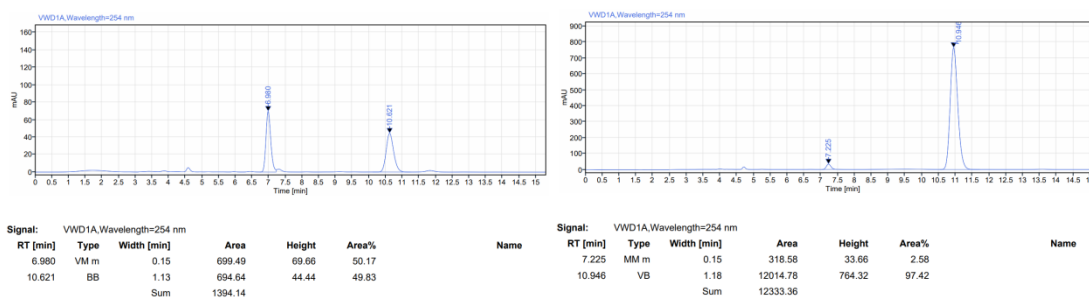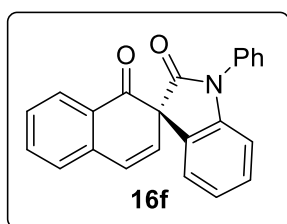

The reaction of the **15f** (67.4 mg, 0.2 mmol, 1.0 equiv.), *m*CPBA (52.9 mg, 0.26 mmol, 1.3 equiv.), **Cat-9** (42.0 mg, 0.03 mmol, 15 mol%),  $\text{H}_2\text{O}$  (36.0 mg, 2.0 mmol, 10.0 equiv.), TFE (1.0g, 10 mmol, 50.0 equiv.) in  $\text{MeNO}_2$  (dry., 3.0 mL) at  $-10$  °C for 24 h afforded compound **16f** (27.1 mg) in 40% yield as oil. The title compound **16f** was isolated through chromatography on silica gel eluting with petroleum ether/ethyl acetate (5/1 to 2/1). ( $R_f = 0.5$ , petroleum ether/ethyl acetate = 2/1).  **$^1\text{H NMR}$**  (400 MHz,  $\text{CDCl}_3$ )  $\delta$  8.00 (d,  $J = 7.7$  Hz, 1H), 7.68-7.60 (m, 1H), 7.57-7.46 (m, 4H), 7.45-7.34 (m, 3H), 7.28-7.20 (m, 1H), 7.03-6.93 (m, 3H), 6.87 (d,  $J = 8.0$  Hz, 1H), 6.19 (d,  $J = 9.6$  Hz, 1H).;  **$^{13}\text{C NMR}$**  (100 MHz,  $\text{CDCl}_3$ )  $\delta$  194.1, 172.4, 145.1, 138.4, 135.5, 134.3, 129.8, 129.4, 129.3, 128.9, 128.9, 128.5, 128.4,

128.4, 128.2, 127.9, 126.8, 123.8, 123.6, 110.4, 64.6., **HRMS** (ESI)  $m/z$  Calcd for  $[C_{23}H_{15}NO_2, M+Na]^+$  : 338.1176, found 338.1178.

**Optical Rotation:**  $[\alpha]_D^{25}$  -128.2 ( $c = 1$ ,  $CHCl_3$ ). 96% *ee* (HPLC conditions: Chiralpak AD-H column, *n*-Hexane/*i*-PrOH = 70:30, flow rate = 1.0 mL/min, 30 °C, wavelength = 254 nm,  $t_R = 8.013$  min for minor isomer,  $t_R = 26.230$  min for major isomer).

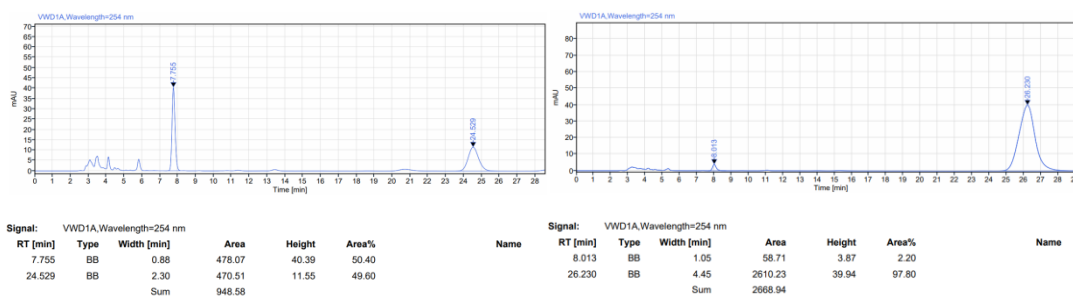

### 7.3 Characterization of direct C(sp<sup>2</sup>)-H/C(sp<sup>3</sup>)-H cross-coupling

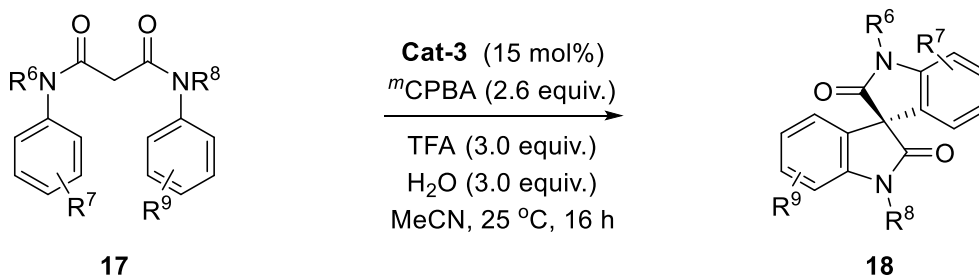

**General procedure:** To a Schlenk tube containing **Cat-3** (0.03 mmol, 15 mol%), *m*CPBA (0.52 mmol, 2.6 equiv.), TFA (0.6 mmol, 3 equiv.) and H<sub>2</sub>O (0.6 mmol, 3 equiv.) and MeCN (3 mL) were added **17** (0.2 mmol, 1.0 equiv.), the reaction mixture was stirred at 25 °C for 16 hours, which was then quenched in the sequence of saturated Na<sub>2</sub>S<sub>2</sub>O<sub>3</sub> and NaHCO<sub>3</sub> aqueous solution. The organic layer was subsequently extracted with ethyl acetate, washed with brine, dried over anhydrous Na<sub>2</sub>SO<sub>4</sub>. Finally, the mixture was concentrated *in vacuo*, and then the residue was purified by silica gel column chromatography to afford the product **18**.

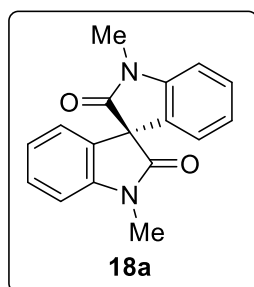

The reaction of the **17a** (56.4 mg, 0.2 mmol, 1.0 equiv.), *m*CPBA (105.6 mg, 0.52 mmol, 2.6 equiv.), **Cat-3** (38.0 mg, 0.03 mmol, 15 mol%), H<sub>2</sub>O (10.8 mg, 0.6 mmol, 3.0 equiv.), TFE (60.0g, 0.6 mmol, 3.0 equiv.) in MeCN (dry, 3.0 mL) at room temperature for 16 h afforded compound **18a** (40.0 mg) in 72% yield as a white solid. The title compound **18a** was isolated through chromatography on silica gel eluting with petroleum ether/ethyl acetate (5/1 to 1/1). (*R<sub>f</sub>* = 0.5, petroleum ether/ethyl acetate = 1/1). **<sup>1</sup>H NMR** (400 MHz, CDCl<sub>3</sub>) δ7.36 (t, *J* = 8.4 Hz, 1H), 7.02 (t, *J* = 7.6 Hz, 1H), 6.96 (d, *J* = 7.8 Hz, 1H), 6.88 (d, *J* = 6.2 Hz, 1H), 3.31 (s, 2H).; **<sup>13</sup>C NMR** (100 MHz, CDCl<sub>3</sub>) δ172.3, 145.4, 129.7, 127.9, 124.0, 123.4, 109.0, 62.4, 27.2. **HRMS** (ESI) *m/z* Calcd for [C<sub>17</sub>H<sub>14</sub>N<sub>2</sub>O<sub>2</sub>, M+H]<sup>+</sup>: 279.1128, found 279.1129.

**Optical Rotation:**  $[\alpha]_D^{25} -71$  ( $c = 0.5$ ,  $\text{CHCl}_3$ ). 90% *ee* (HPLC conditions: Chiralpak OD-H column, *n*-Hexane/*i*-PrOH = 70:30, flow rate = 1.0 mL/min, 30 °C, wavelength = 254 nm,  $t_R = 11.836$  min for major isomer,  $t_R = 27.463$  min for minor isomer).

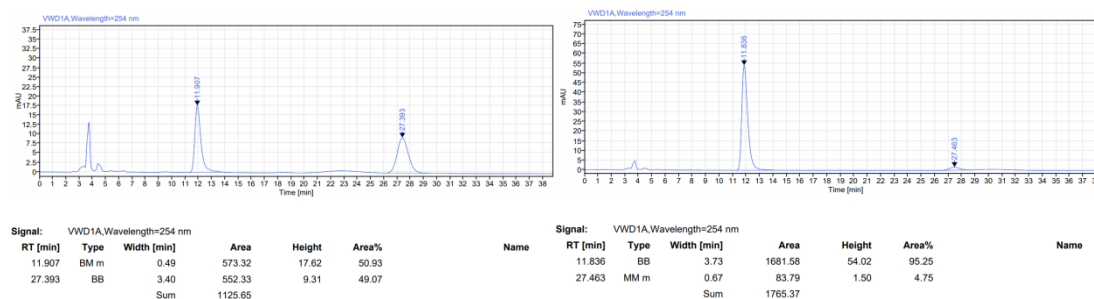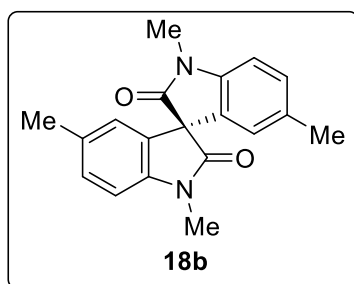

The reaction of the **17b** (62.0 mg, 0.2 mmol, 1.0 equiv.), *m*CPBA (105.6 mg, 0.52 mmol, 2.6 equiv.), **Cat-3** (38.0 mg, 0.03 mmol, 15 mol%),  $\text{H}_2\text{O}$  (10.8 mg, 0.6 mmol, 3.0 equiv.), TFE (60.0g, 0.6 mmol, 3.0 equiv.) in MeCN (dry, 3.0 mL) at room temperature for 16 h afforded

compound **18b** (48.9 mg) in 80% yield as a white solid. The title compound **18b** was isolated through chromatography on silica gel eluting with petroleum ether/ethyl acetate (5/1 to 1/1). ( $R_f = 0.5$ , petroleum ether/ethyl acetate = 1/1).  $^1\text{H NMR}$  (400 MHz,  $\text{CDCl}_3$ )  $\delta$  7.15 (dd,  $J = 8.0, 1.7$  Hz, 1H), 6.85 (d,  $J = 8.0$  Hz, 1H), 6.71 (s, 1H), 3.29 (s, 3H), 2.25 (s, 3H);  $^{13}\text{C NMR}$  (100 MHz,  $\text{CDCl}_3$ )  $\delta$  172.4, 143.0, 133.1, 129.9, 128.0, 124.7, 108.6, 62.5, 27.1, 21.1., **HRMS** (ESI)  $m/z$  Calcd for  $[\text{C}_{19}\text{H}_{18}\text{N}_2\text{O}_2, \text{M}+\text{H}]^+$ : 307.1441, found 307.1441.

**Optical Rotation:**  $[\alpha]_D^{25} -111.2$  ( $c = 0.5$ ,  $\text{CHCl}_3$ ). 82% *ee* (HPLC conditions: Chiralpak OD-H column, *n*-Hexane/*i*-PrOH = 70:30, flow rate = 1.0 mL/min, 30 °C, wavelength = 254 nm,  $t_R = 7.751$  min for minor isomer,  $t_R = 9.406$  min for major isomer).

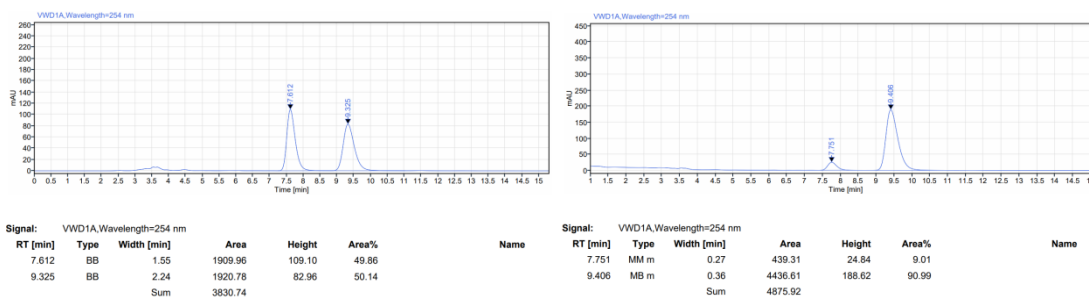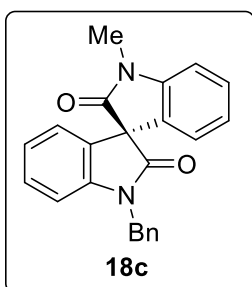

The reaction of the **17c** (71.6 mg, 0.2 mmol, 1.0 equiv.), *m*CPBA (105.6 mg, 0.52 mmol, 2.6 equiv.), **Cat-3** (38.0 mg, 0.03 mmol, 15 mol%), H<sub>2</sub>O (10.8 mg, 0.6 mmol, 3.0 equiv.), TFE (60.0g, 0.6 mmol, 3.0 equiv.) in MeCN (dry, 3.0 mL) at room temperature for 16 h afforded compound **18c** (33.3 mg) in 47% yield as a

white solid. The title compound **18c** was isolated through chromatography on silica gel eluting with petroleum ether/ethyl acetate (5/1 to 1/1). (*R<sub>f</sub>* = 0.5, petroleum ether/ethyl acetate = 1/1). <sup>1</sup>H NMR (400 MHz, CDCl<sub>3</sub>) δ 7.57-7.21 (m, 7H), 7.15-6.89 (m, 5H), 6.84 (d, *J* = 7.9 Hz, 1H), 5.06 (t, *J* = 11.1 Hz, 2H), 3.36 (s, 3H); <sup>13</sup>C NMR (100 MHz, CDCl<sub>3</sub>) δ 172.5, 172.3, 145.5, 144.4, 135.3, 129.8, 129.6, 129.0, 127.9, 127.9, 127.8, 127.2, 124.0, 123.9, 123.5, 123.4, 110.0, 109.0, 62.4, 44.3, 27.1., HRMS (ESI) *m/z* Calcd for [C<sub>23</sub>H<sub>18</sub>N<sub>2</sub>O<sub>2</sub>, M+H]<sup>+</sup>: 355.1441, found 355.1440.

**Optical Rotation:** [ $\alpha$ ]<sub>D</sub><sup>25</sup> -29.2 (*c* = 0.5, CHCl<sub>3</sub>). 89% *ee* (HPLC conditions: Chiralpak OD-H column, *n*-Hexane/*i*-PrOH = 85:15, flow rate = 1.0 mL/min, 30 °C, wavelength = 254 nm, *t<sub>R</sub>* = 22.980 min for major isomer, *t<sub>R</sub>* = 26.662 min for minor isomer).

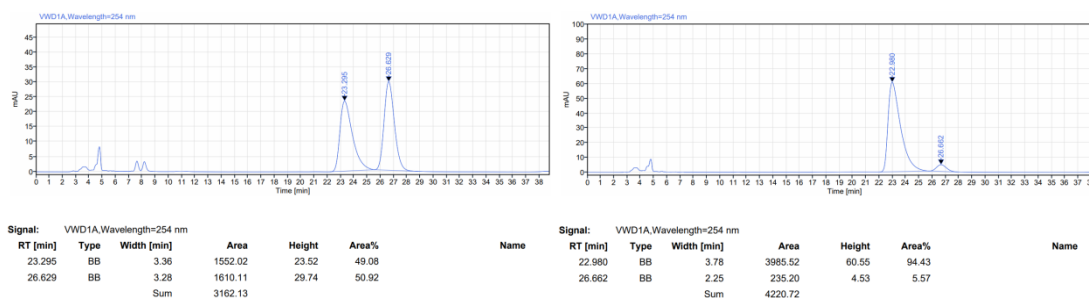



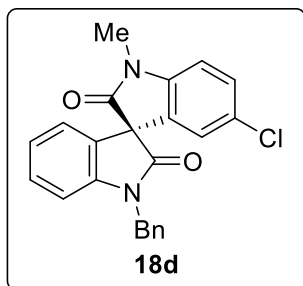

The reaction of the **17d** (78.4 mg, 0.2 mmol, 1.0 equiv.), *m*CPBA (105.6 mg, 0.52 mmol, 2.6 equiv.), **Cat-3** (38.0 mg, 0.03 mmol, 15 mol%), H<sub>2</sub>O (10.8 mg, 0.6 mmol, 3.0 equiv.), TFE (60.0g, 0.6 mmol, 3.0 equiv.) in MeCN (dry, 3.0 mL) at room temperature for 16 h afforded compound **18d** (31.8

mg) in 41% yield as a white solid. The title compound **18d** was isolated through chromatography on silica gel eluting with petroleum ether/ethyl acetate (5/1 to 1/1). (*R*<sub>f</sub> = 0.5, petroleum ether/ethyl acetate = 1/1). <sup>1</sup>H NMR (400 MHz, CDCl<sub>3</sub>) δ 7.43-7.33 (m, 5H), 7.32-7.27 (m, 1H), 7.25-7.22 (m, 1H), 7.00 (td, *J* = 7.6, 1.0 Hz, 1H), 6.96-6.84 (m, 3H), 6.81 (d, *J* = 7.9 Hz, 1H), 5.11-4.89 (m, 2H), 3.32 (s, 3H).; <sup>13</sup>C NMR (100 MHz, CDCl<sub>3</sub>) δ 171.9, 171.8, 144.4, 144.1, 135.1, 129.9, 129.8, 129.3, 129.1, 128.8, 127.9, 127.2, 127.2, 124.5, 124.1, 123.6, 110.2, 109.9, 62.3, 44.5, 27.3., HRMS (ESI) *m/z* Calcd for [C<sub>23</sub>H<sub>17</sub>ClN<sub>2</sub>O<sub>2</sub>, M+H]<sup>+</sup>: 389.1051, 391.1022, found 389.1057, 391.1039

**Optical Rotation:** [ $\alpha$ ]<sub>D</sub><sup>25</sup> -74.8 (*c* = 0.5, CHCl<sub>3</sub>). 86% *ee* (HPLC conditions: Chiralpak AD-H column, *n*-Hexane/*i*-PrOH = 70:30, flow rate = 1.0 mL/min, 30 °C, wavelength = 254 nm, *t*<sub>R</sub> = 15.267 min for major isomer, *t*<sub>R</sub> = 21.668 min for minor isomer).

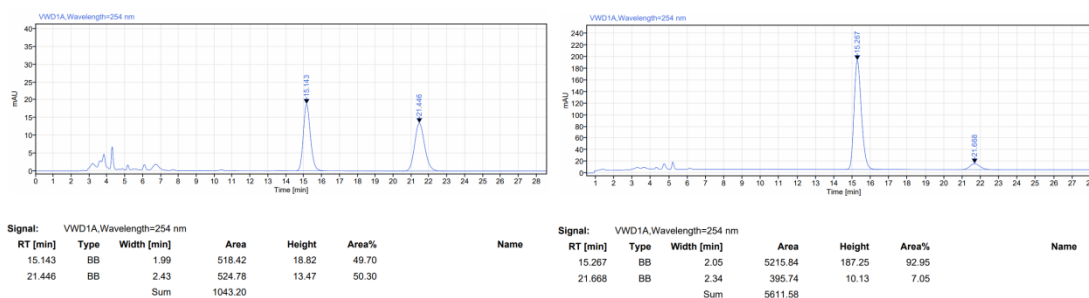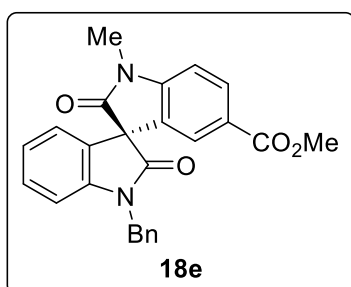

The reaction of the **17e** (83.2 mg, 0.2 mmol, 1.0 equiv.), *m*CPBA (105.6 mg, 0.52 mmol, 2.6 equiv.), **Cat-3** (38.0 mg, 0.03 mmol, 15 mol%), H<sub>2</sub>O (10.8 mg, 0.6 mmol, 3.0 equiv.), TFE (60.0g, 0.6 mmol, 3.0 equiv.) in MeCN (dry, 3.0 mL) at room temperature for 16 h afforded

compound **18e** (51.0 mg) in 62% yield as a white solid. The title compound **18e** was isolated through chromatography on silica gel eluting with petroleum ether/ethyl acetate (5/1 to 1/1). ( $R_f = 0.5$ , petroleum ether/ethyl acetate = 1/1).  $^1\text{H NMR}$  (400 MHz,  $\text{CDCl}_3$ )  $\delta$  8.14 (dt,  $J = 8.3, 1.4$  Hz, 1H), 7.61 (d,  $J = 1.6$  Hz, 1H), 7.40-7.34 (m, 4H), 7.30 (p,  $J = 2.9$  Hz, 1H), 7.24 (dd,  $J = 7.8, 1.4$  Hz, 1H), 7.05-6.97 (m, 2H), 6.84 (dd,  $J = 23.5, 7.7$  Hz, 2H), 5.13-4.89 (m, 2H), 3.85 (s, 3H), 3.37 (s, 3H).;  $^{13}\text{C NMR}$  (100 MHz,  $\text{CDCl}_3$ )  $\delta$  172.5, 172.0, 166.5, 149.5, 144.5, 135.1, 132.4, 129.9, 129.1, 127.9, 127.2, 127.2, 125.5, 125.4, 124.1, 123.7, 110.2, 108.6, 62.1, 52.3, 44.5, 27.4. **HRMS** (ESI)  $m/z$  Calcd for  $[\text{C}_{25}\text{H}_{20}\text{N}_2\text{O}_4, \text{M}+\text{H}]^+$  : 413.1496, found 413.1496.

**Optical Rotation:**  $[\alpha]_D^{25} -176.6$  ( $c = 0.5$ ,  $\text{CHCl}_3$ ). 87% *ee* (HPLC conditions: Chiralpak AD-H column, *n*-Hexane/*i*-PrOH = 70:30, flow rate = 1.0 mL/min, 30 °C, wavelength = 254 nm,  $t_R = 22.257$  min for major isomer,  $t_R = 38.566$  min for minor isomer).

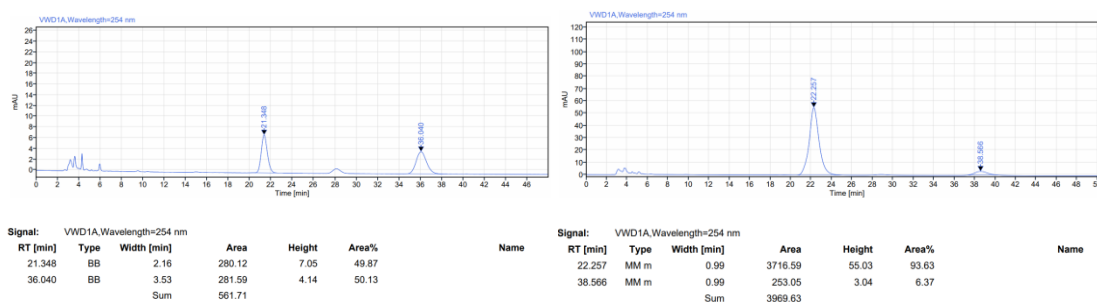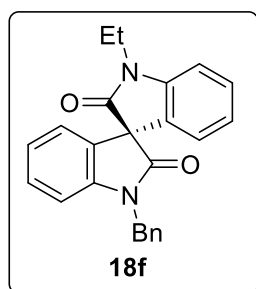

The reaction of the **17f** (74.4 mg, 0.2 mmol, 1.0 equiv.), *m*CPBA (105.6 mg, 0.52 mmol, 2.6 equiv.), **Cat-3** (38.0 mg, 0.03 mmol, 15 mol%),  $\text{H}_2\text{O}$  (10.8 mg, 0.6 mmol, 3.0 equiv.), TFE (60.0g, 0.6 mmol, 3.0 equiv.) in MeCN (dry, 3.0 mL) at room temperature for 16 h afforded compound **18f** (38.3 mg) in 52% yield as a white solid. The title compound **18f** was isolated through chromatography on silica gel eluting with petroleum ether/ethyl acetate (5/1 to 1/1). ( $R_f = 0.5$ , petroleum ether/ethyl acetate = 1/1).  $^1\text{H NMR}$  (400 MHz,  $\text{CDCl}_3$ )  $\delta$  7.57-7.33 (m, 5H), 7.29 (d,  $J = 6.9$  Hz, 1H), 7.22 (t,  $J = 7.7$  Hz, 1H), 7.01 (dq,  $J = 14.2, 7.5$  Hz, 3H), 6.90 (dd,  $J = 17.3, 7.4$  Hz, 2H), 6.80 (d,  $J = 7.9$  Hz, 1H), 5.11-4.88 (m, 2H),

4.02-3.75 (m, 2H), 1.37 (t,  $J = 7.2$  Hz, 3H);  $^{13}\text{C}$  NMR (100 MHz,  $\text{CDCl}_3$ )  $\delta$  172.5, 171.9, 144.6, 144.4, 135.3, 129.7, 129.5, 129.0, 128.2, 128.1, 127.8, 127.2, 124.1, 123.8, 123.4, 123.3, 110.0, 109.1, 62.4, 44.3, 35.6, 12.8., **HRMS** (ESI)  $m/z$  Calcd for  $[\text{C}_{24}\text{H}_{20}\text{N}_2\text{O}_2, \text{M}+\text{H}]^+$ : 368.1598, found 369.1604.

**Optical Rotation:**  $[\alpha]_D^{25} -11.6$  ( $c = 0.5$ ,  $\text{CHCl}_3$ ). 89% *ee* (HPLC conditions: Chiralpak AD-H column, *n*-Hexane/*i*-PrOH = 70:30, flow rate = 1.0 mL/min, 30 °C, wavelength = 254 nm,  $t_R = 12.404$  min for major isomer,  $t_R = 37.330$  min for minor isomer).

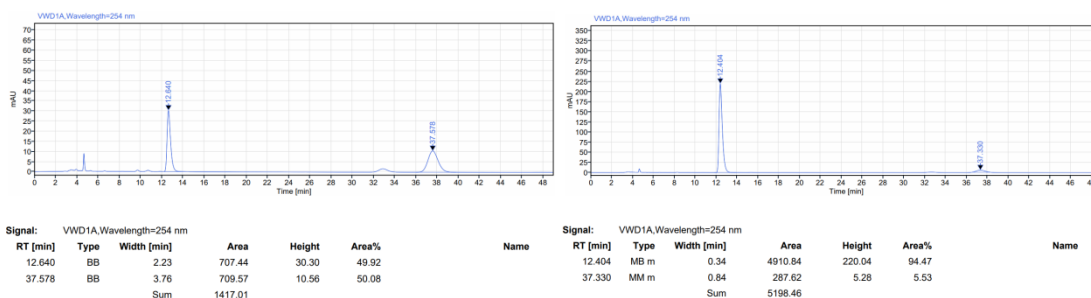

## 7.4 Characterization of oxidative fluorination of keto esters.

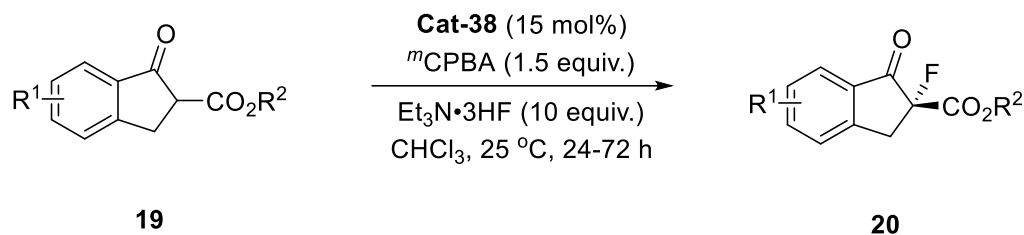

**General procedure:** To a Teflon tube containing  $\beta$ -ketoesters **19** (0.20 mmol, 1.0 equiv.), **Cat-38** (0.03 mmol, 15 mol%), and  $\text{CHCl}_3$  (8 mL) were added  $\text{NEt}_3\cdot 3\text{HF}$  (2 mmol, 10 equiv.) and *m*CPBA (0.3 mmol, 1.5 equiv.) in turn, the reaction mixture was stirred at 25 °C for 24-72 hours, which was then quenched in the sequence of saturated  $\text{Na}_2\text{S}_2\text{O}_3$  and  $\text{NaHCO}_3$  aqueous solution. The organic layer was subsequently extracted with dichloromethane, washed with brine, dried over anhydrous  $\text{Na}_2\text{SO}_4$ . Finally, the mixture was concentrated *in vacuo*, and then the residue was purified by silica gel column chromatography to afford the desired product **20**.

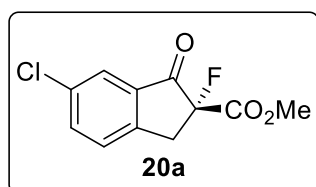

The reaction of the  $\beta$ -keto ester **19a** (44.8 mg, 0.20 mmol, 1.0 equiv.), *m*CPBA (61.8mg, 0.3 mmol, 1.5 equiv.), **Cat-38** (0.03 mmol, 15 mol%),  $\text{NEt}_3\cdot 3\text{HF}$  (334  $\mu\text{L}$ , 2 mmol, 10 equiv.) in  $\text{CHCl}_3$  (8 mL) at 25 °C for 24 h afforded compound **20a** (27.6 mg) in 57% yield as a white solid. The title compound **20a** was isolated through chromatography on silica gel eluting with petroleum ether/ethyl acetate (20/1 to 5/1). ( $R_f$  = 0.6, petroleum ether/ethyl acetate = 5/1).  **$^1\text{H}$  NMR** (400 MHz,  $\text{CDCl}_3$ )  $\delta$  7.80 (d,  $J$  = 2.1 Hz, 1H), 7.66 (dd,  $J$  = 8.2, 2.1 Hz, 1H), 7.46 (d,  $J$  = 8.2 Hz, 1H), 3.81 (s, 3H), 3.77 (dd,  $J$  = 17.7, 10.8 Hz, 1H), 3.41 (dd,  $J$  = 22.9, 17.7 Hz, 1H).;  **$^{13}\text{C}$  NMR** (100 MHz,  $\text{CDCl}_3$ )  $\delta$  194.1 (d,  $^2J_{\text{C-F}}$  = 18.3 Hz), 167.4 (d,  $^2J_{\text{C-F}}$  = 27.7 Hz), 149.0 (d,  $^3J_{\text{C-F}}$  = 3.7 Hz), 136.9, 135.3, 134.8(d,  $^3J_{\text{C-F}}$  = 1.4 Hz), 128.0, 125.5, 94.9 (d,  $^1J_{\text{C-F}}$  = 202.8 Hz), 53.6, 38.0 (d,  $^2J_{\text{C-F}}$  = 24.0 Hz).,  **$^{19}\text{F}$  NMR** (376 MHz,  $\text{CDCl}_3$ )  $\delta$  -164.16. **GC-MS (EI)**  $m/z$  Calcd for  $[\text{C}_{11}\text{H}_8\text{ClFO}]^+$ : 242.0, 244.0; found 242.0, 244.0

**Optical Rotation:**  $[\alpha]_D^{25}$  4.2 ( $c = 0.5$ ,  $\text{CHCl}_3$ ). 90% *ee* (HPLC conditions: Chiralpak OD-H column, *n*-Hexane/*i*-PrOH = 95:5, flow rate = 1.0 mL/min, 30 °C, wavelength = 254 nm,  $t_R = 15.678$  min for major isomer,  $t_R = 16.611$  min for minor isomer).

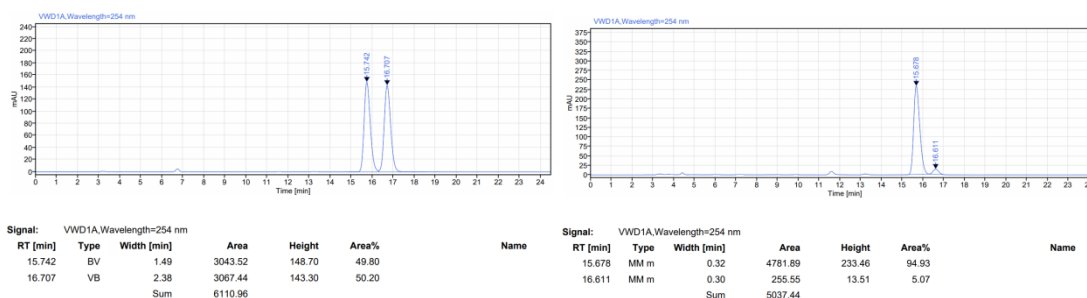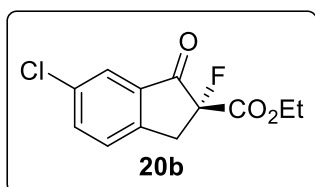

The reaction of the  $\beta$ -keto ester **19b** (47.6mg, 0.20 mmol, 1.0 equiv.), *m*CPBA (61.8mg, 0.3 mmol, 1.5 equiv.), **Cat-38** (0.03 mmol, 15 mol%),  $\text{NEt}_3 \cdot 3\text{HF}$  (334  $\mu\text{L}$ , 2 mmol, 10 equiv.) in  $\text{CHCl}_3$  (8 mL) at 25 °C for 24 h afforded compound **20b** (26.6 mg) in 52% yield as oil. The title compound **20b** was isolated through chromatography on silica gel eluting with petroleum ether/ethyl acetate (20/1 to 5/1). ( $R_f = 0.6$ , petroleum ether/ethyl acetate = 5/1).  $^1\text{H NMR}$  (400 MHz,  $\text{CDCl}_3$ )  $\delta$  7.79 (d,  $J = 2.4$  Hz, 1H), 7.66 (dd,  $J = 8.1, 2.4$  Hz, 1H), 7.46 (d,  $J = 8.3$  Hz, 1H), 4.27 (q,  $J = 7.1$  Hz, 2H), 3.75 (dd,  $J = 17.8, 11.0$  Hz, 1H), 3.39 (dd,  $J = 23.0, 17.7$  Hz, 1H), 1.25 (t,  $J = 7.1$  Hz, 3H);  $^{13}\text{C NMR}$  (100 MHz,  $\text{CDCl}_3$ )  $\delta$  194.3 (d,  $^2J_{\text{C-F}} = 18.2$  Hz), 167.0 (d,  $^2J_{\text{C-F}} = 27.6$  Hz), 149.1 (d,  $^3J_{\text{C-F}} = 4.4$  Hz), 136.8, 135.2, 134.8, 127.9, 125.4, 94.8 (d,  $^1J_{\text{C-F}} = 202.7$  Hz), 62.9, 38.0 (d,  $^2J_{\text{C-F}} = 24.0$  Hz), 14.1.  $^{19}\text{F NMR}$  (376 MHz,  $\text{CDCl}_3$ )  $\delta$  -164.04. **GC-MS (EI)**  $m/z$  Calcd for  $[\text{C}_{12}\text{H}_{10}\text{ClFO}_3]^+$ : 256.0, found 256.0.

**Optical Rotation:**  $[\alpha]_D^{25}$  2.7 ( $c = 1.0$ ,  $\text{CHCl}_3$ ). 88% *ee* (HPLC conditions: Chiralpak AD-H column, *n*-Hexane/*i*-PrOH = 85:15, flow rate = 0.5 mL/min, 30 °C, wavelength = 254 nm,  $t_R = 11.849$  min for major isomer,  $t_R = 13.353$  min for minor isomer).

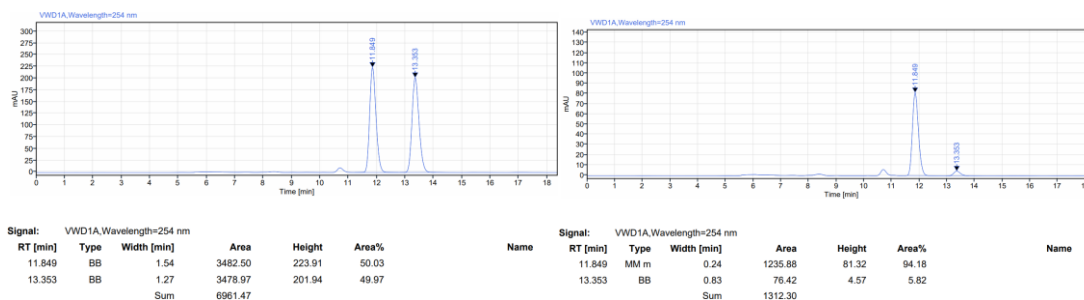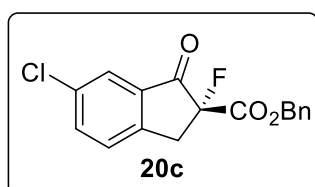

The reaction of the  $\beta$ -keto ester **19c** (60.0 mg, 0.20 mmol, 1.0 equiv.), *m*CPBA (61.8mg, 0.3 mmol, 1.5 equiv.), **Cat-38** (0.03 mmol, 15 mol%),  $\text{NEt}_3 \cdot 3\text{HF}$  (334  $\mu\text{L}$ , 2 mmol, 10 equiv.) in  $\text{CHCl}_3$  (8 mL) at 25 °C for 24 h afforded compound **20c** (31.8 mg) in 50% yield as oil. The title compound **20c** was isolated through chromatography on silica gel eluting with petroleum ether/ethyl acetate (20/1 to 5/1). ( $R_f = 0.6$ , petroleum ether/ethyl acetate = 5/1).  $^1\text{H NMR}$  (400 MHz,  $\text{CDCl}_3$ )  $\delta$  7.79 (d,  $J = 2.1$  Hz, 1H), 7.65 (dd,  $J = 8.2, 2.1$  Hz, 1H), 7.44 (d,  $J = 8.1$  Hz, 1H), 7.37-7.30 (m, 3H), 7.30-7.24 (m, 2H), 5.30-5.19 (m, 2H), 3.73 (dd,  $J = 17.7, 11.1$  Hz, 1H), 3.39 (dd,  $J = 22.8, 17.7$  Hz, 1H).;  $^{13}\text{C NMR}$  (100 MHz,  $\text{CDCl}_3$ )  $\delta$  194.1(d,  $^2J_{\text{C-F}} = 18.7$  Hz), 166.9 (d,  $^2J_{\text{C-F}} = 28.3$  Hz), 149.0 (d,  $^3J_{\text{C-F}} = 3.7$  Hz), 136.9, 135.3, 134.8, 134.6, 128.8, 128.3, 127.9, 125.4, 94.8 (d,  $^1J_{\text{C-F}} = 203.0$  Hz), 68.2, 37.9 (d,  $^2J_{\text{C-F}} = 24.2$  Hz).  $^{19}\text{F NMR}$  (376 MHz,  $\text{CDCl}_3$ )  $\delta$  -164.02. **HRMS** (ESI)  $m/z$  Calcd for  $[\text{C}_{17}\text{H}_{12}\text{ClFO}_3, \text{M}+\text{Na}]^+$ :341.0369, found 341.0353.

**Optical Rotation:**  $[\alpha]_D^{25} -1.6$  ( $c = 0.25$ ,  $\text{CHCl}_3$ ). 85% *ee* (HPLC conditions: Chiralpak AD-H column, *n*-Hexane/*i*-PrOH = 85:15, flow rate = 1.0 mL/min, 30 °C, wavelength = 254 nm,  $t_R = 8.390$  min for major isomer,  $t_R = 9.912$  min for minor isomer).

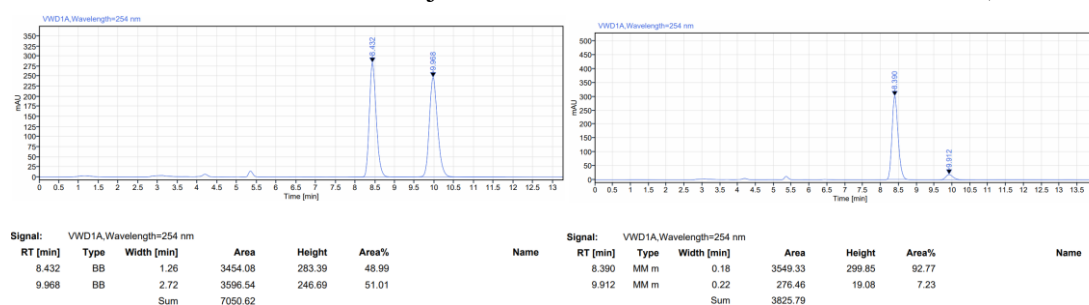

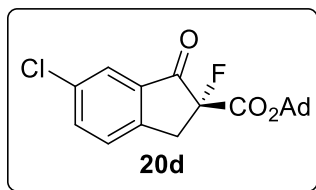

The reaction of the  $\beta$ -keto ester **19d** (68.8 mg, 0.20 mmol, 1.0 equiv.), *m*CPBA (61.8mg, 0.3 mmol, 1.5 equiv.), **Cat-38** (0.03 mmol, 15 mol%),  $\text{NEt}_3 \cdot 3\text{HF}$  (334  $\mu\text{L}$ , 2 mmol, 10 equiv.) in  $\text{CHCl}_3$  (8 mL) at 25 °C for 24 h afforded compound **20d** (29.7 mg) in 41% yield as white solid. The title compound **20d** was isolated through chromatography on silica gel eluting with petroleum ether/ethyl acetate (20/1 to 5/1). ( $R_f$  = 0.6, petroleum ether/ethyl acetate = 5/1).  $^1\text{H NMR}$  (400 MHz,  $\text{CDCl}_3$ )  $\delta$  7.76 (s, 1H), 7.65-7.60 (m, 1H), 7.44 (d,  $J$  = 8.1 Hz, 1H), 3.69 (dd,  $J$  = 17.6, 10.0 Hz, 1H), 3.35 (dd,  $J$  = 22.5, 17.6 Hz, 1H), 2.13 (s, 3H), 2.02 (d,  $J$  = 3.5 Hz, 6H), 1.60 (t,  $J$  = 3.4 Hz, 6H);  $^{13}\text{C NMR}$  (100 MHz,  $\text{CDCl}_3$ )  $\delta$  194.8 (d,  $^2J_{\text{C-F}}$  = 18.9 Hz), 165.4 (d,  $^2J_{\text{C-F}}$  = 27.6 Hz), 149.2 ( $^3J_{\text{C-F}}$ ,  $J$  = 3.6 Hz), 136.5, 135.1, 134.9, 127.8, 125.1, 94.5 (d,  $^1J_{\text{C-F}}$  = 202.7 Hz), 84.6, 41.1, 38.1 (d,  $^2J_{\text{C-F}}$  = 24.0 Hz), 35.9, 30.9.  $^{19}\text{F NMR}$  (376 MHz,  $\text{CDCl}_3$ )  $\delta$  -163.60. **HRMS** (ESI)  $m/z$  Calcd for  $[\text{C}_{20}\text{H}_{20}\text{ClFO}_3, \text{M}+\text{Na}]^+$ : 385.0977, found 385.0973.

**Optical Rotation:**  $[\alpha]_D^{25}$  10.8 ( $c$  = 0.5,  $\text{CHCl}_3$ ). 90% *ee* (HPLC conditions: Chiralpak OD-H column, *n*-Hexane/*i*-PrOH = 90:10, flow rate = 1.0 mL/min, 30 °C, wavelength = 254 nm,  $t_R$  = 7.437 min for major isomer,  $t_R$  = 8.714 min for minor isomer).

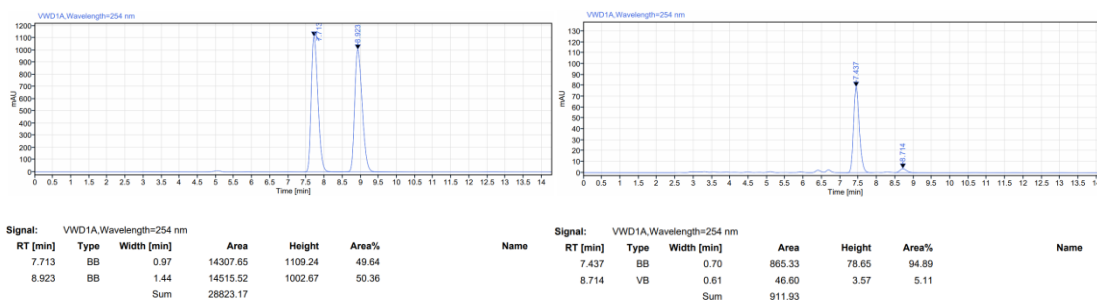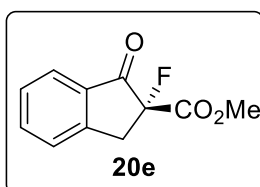

The reaction of the  $\beta$ -keto ester **19e** (38 mg, 0.20 mmol, 1.0 equiv.), *m*CPBA (61.8mg, 0.3 mmol, 1.5 equiv.), **Cat-38** (0.03 mmol, 15 mol%),  $\text{NEt}_3 \cdot 3\text{HF}$  (334  $\mu\text{L}$ , 2 mmol, 10 equiv.) in  $\text{CHCl}_3$  (8 mL) at 25 °C for 48 h afforded compound **20e** (20.8 mg) in 50% yield as oil. The title compound **20e** was isolated through chromatography on silica gel eluting with petroleum ether/ethyl acetate (20/1 to 5/1).

( $R_f = 0.6$ , petroleum ether/ethyl acetate = 5/1).  **$^1\text{H NMR}$**  (400 MHz,  $\text{CDCl}_3$ )  $\delta$  7.79 (d,  $J = 7.8$  Hz, 1H), 7.68 (m, 1H), 7.49 (m, 1H), 7.46-7.39 (m, 1H), 3.84-3.72 (m, 1H), 3.76 (s, 3H), 3.41 (dd,  $J = 23.5, 17.7$  Hz, 1H);  **$^{13}\text{C NMR}$**  (100 MHz,  $\text{CDCl}_3$ )  $\delta$  195.3 (d,  $^2J_{\text{C-F}} = 18.2$  Hz), 167.7 (d,  $^2J_{\text{C-F}} = 28.3$  Hz), 150.9 (d,  $^3J_{\text{C-F}} = 3.6$  Hz), 136.9, 133.1, 128.7, 126.7 (d,  $^3J_{\text{C-F}} = 1.04$  Hz), 125.6, 94.6 (d,  $^1J_{\text{C-F}} = 201.3$  Hz), 53.3, 38.2 (d,  $^2J_{\text{C-F}} = 24.0$  Hz).  **$^{19}\text{F NMR}$**  (376 MHz,  $\text{CDCl}_3$ )  $\delta$  -164.53. **HRMS** (ESI)  $m/z$  Calcd for  $[\text{C}_{11}\text{H}_9\text{FO}_3, \text{M}+\text{Na}]^+$ : 231.0428, found 231.0422.

**Optical Rotation:**  $[\alpha]_D^{25} -17.0$  ( $c = 1.0$ ,  $\text{CHCl}_3$ ). 80% *ee* (HPLC conditions: Chiralpak OD-H column, *n*-Hexane/*i*-PrOH = 90:10, flow rate = 1.0 mL/min, 30 °C, wavelength = 254 nm,  $t_R = 8.124$  min for major isomer,  $t_R = 9.052$  min for minor isomer).

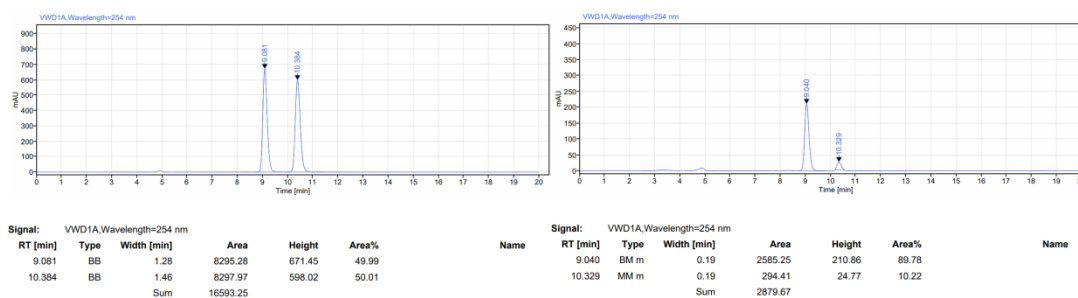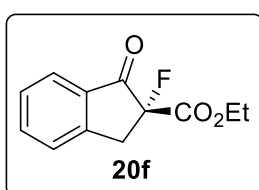

The reaction of the  $\beta$ -keto ester **19f** (72.4mg, 0.20 mmol, 1.0 equiv.), *m*CPBA (61.8mg, 0.3 mmol, 1.5 equiv.), **Cat-38** (0.03 mmol, 15 mol%),  $\text{NEt}_3 \cdot 3\text{HF}$  (334  $\mu\text{L}$ , 2 mmol, 10 equiv.) in  $\text{CHCl}_3$  (8 mL) at 25 °C for 24 h afforded compound **20f** (25.8 mg) in 58% yield as oil. The title compound **20f** was isolated through chromatography on silica gel eluting with petroleum ether/ethyl acetate (20/1 to 5/1). ( $R_f = 0.6$ , petroleum ether/ethyl acetate = 5/1).  **$^1\text{H NMR}$**  (400 MHz,  $\text{CDCl}_3$ )  $\delta$  7.84 (d,  $J = 7.7$  Hz, 1H), 7.71 (td,  $J = 7.5, 1.2$  Hz, 1H), 7.54-7.43 (m, 2H), 4.28 (q,  $J = 7.1$  Hz, 2H), 3.79 (dd,  $J = 17.6, 11.5$  Hz, 1H), 3.44 (dd,  $J = 23.3, 17.6$  Hz, 1H), 1.26 (t,  $J = 7.1$  Hz, 3H).;  **$^{13}\text{C NMR}$**  (100 MHz,  $\text{CDCl}_3$ )  $\delta$  195.5 (d,  $^2J_{\text{C-F}} = 18.8$  Hz), 167.5 (d,  $^2J_{\text{C-F}} = 27.6$  Hz), 151.1 (d,  $^3J_{\text{C-F}} = 3.6$  Hz), 136.9, 133.4, 128.8, 126.7, 125.8, 94.6 (d,  $^1J_{\text{C-F}} = 201.3$



Hz), 62.8, 38.4 (d,  $^2J_{C-F} = 24.0$  Hz), 14.2.  $^{19}\text{F}$  NMR (376 MHz,  $\text{CDCl}_3$ )  $\delta$  -164.44.

**HRMS** (ESI)  $m/z$  Calcd for  $[\text{C}_{12}\text{H}_{11}\text{FO}_3, \text{M}+\text{Na}]^+$ : 245.0584, found 245.0578.

**Optical Rotation:**  $[\alpha]_D^{25} -3.5$  ( $c = 0.5$ ,  $\text{CHCl}_3$ ). 84% *ee* (HPLC conditions: Chiralpak OD-H column, *n*-Hexane/*i*-PrOH = 90:10, flow rate = 1.0 mL/min, 30 °C, wavelength = 254 nm,  $t_R = 8.124$  min for major isomer,  $t_R = 9.052$  min for minor isomer).

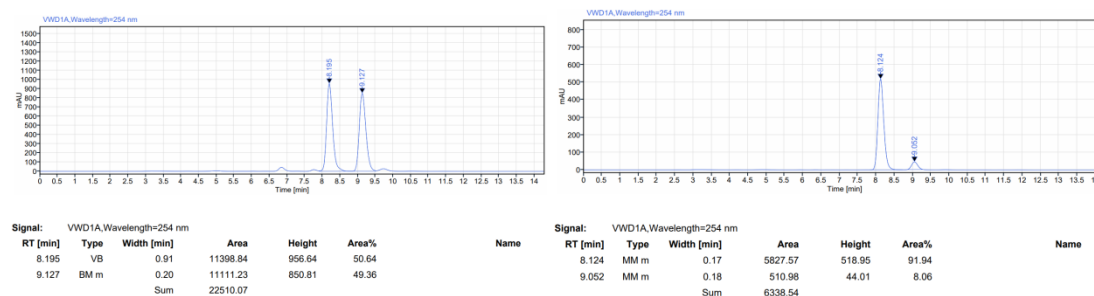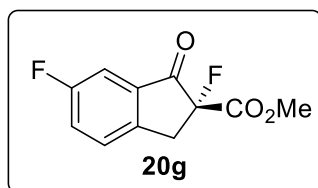

The reaction of the  $\beta$ -keto ester **19g** (40.8 mg, 0.20 mmol, 1.0 equiv.), *m*CPBA (61.8mg, 0.3 mmol, 1.5 equiv.), **Cat-38** (0.03 mmol, 15 mol%),  $\text{NEt}_3 \cdot 3\text{HF}$  (334  $\mu\text{L}$ , 2 mmol, 10 equiv.) in  $\text{CHCl}_3$  (8 mL) at 25 °C for 24 h afforded compound **20g** (23.9 mg) in 53% yield as a white solid. The title compound **20g** was isolated through chromatography on silica gel eluting with petroleum ether/ethyl acetate (20/1 to 5/1). ( $R_f = 0.6$ , petroleum ether/ethyl acetate = 5/1).  $^1\text{H}$  NMR (400 MHz,  $\text{CDCl}_3$ )  $\delta$  7.53-7.38 (m, 3H), 3.81 (s, 3H), 3.76 (dd,  $J = 17.3, 10.6$  Hz, 1H), 3.40 (dd,  $J = 23.0, 18.6$  Hz, 1H);  $^{13}\text{C}$  NMR (100 MHz,  $\text{CDCl}_3$ )  $\delta$  194.5 (dd,  $^2J_{C-F} = 18.8, 3.5$  Hz), 167.5 (d,  $^2J_{C-F} = 27.7$  Hz), 162.9 (d,  $^1J_{C-F} = 250.6$  Hz), 146.5 (dd,  $^3J_{C-F} = 3.5, 2.3$  Hz), 135.0 (d,  $^3J_{C-F} = 7.9$  Hz), 128.3 (d,  $^3J_{C-F} = 8.0$  Hz), 124.8 (d,  $^2J_{C-F} = 23.6$  Hz), 111.5 (d,  $^2J_{C-F} = 22.5$  Hz), 95.1 (d,  $^1J_{C-F} = 202.4$  Hz), 53.5, 37.8 (d,  $^2J_{C-F} = 24.0$  Hz).  $^{19}\text{F}$  NMR (376 MHz,  $\text{CDCl}_3$ )  $\delta$  -163.95,  $\delta$  -111.89. **HRMS** (ESI)  $m/z$  Calcd for  $[\text{C}_{11}\text{H}_8\text{FO}_3, \text{M}+\text{H}]^+$ : 227.0514, found 227.0508.

**Optical Rotation:**  $[\alpha]_D^{25} 3.2$  ( $c = 0.5$ ,  $\text{CHCl}_3$ ). 83% *ee* (HPLC conditions: Chiralpak AD-H column, *n*-Hexane/*i*-PrOH = 90:10, flow rate = 1.0 mL/min, 30 °C, wavelength = 254 nm,  $t_R = 7.943$  min for major isomer,  $t_R = 8.470$  min for minor isomer).

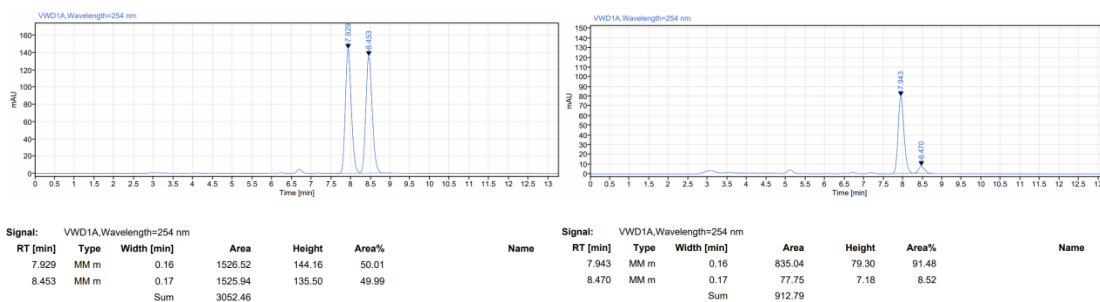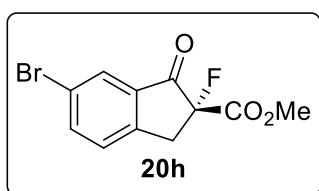

The reaction of the  $\beta$ -keto ester **19h** (53.6 mg, 0.20 mmol, 1.0 equiv.), *m*CPBA (61.8mg, 0.3 mmol, 1.5 equiv.), **Cat-38** (0.03 mmol, 15 mol%),  $\text{NEt}_3 \cdot 3\text{HF}$  (334  $\mu\text{L}$ , 2 mmol, 10 equiv.) in  $\text{CHCl}_3$  (8 mL) at 25 °C for 24 h afforded compound **20h** (36.4 mg) in 64% yield as a white solid. The title compound **20h** was isolated through chromatography on silica gel eluting with petroleum ether/ethyl acetate (20/1 to 5/1). ( $R_f$  = 0.6, petroleum ether/ethyl acetate = 5/1).  $^1\text{H NMR}$  (400 MHz,  $\text{CDCl}_3$ )  $\delta$  7.94 (d,  $J$  = 2.0 Hz, 1H), 7.80 (dd,  $J$  = 8.2, 2.0 Hz, 1H), 7.40 (d,  $J$  = 8.2 Hz, 1H), 3.80 (s, 3H), 3.74 (dd,  $J$  = 17.8, 10.7 Hz, 1H), 3.37 (dd,  $J$  = 22.9, 17.8 Hz, 1H).;  $^{13}\text{C NMR}$  (100 MHz,  $\text{CDCl}_3$ )  $\delta$  194.0 (d,  $^2J_{\text{C-F}}$  = 18.3 Hz), 167.4 (d,  $^2J_{\text{C-F}}$  = 27.7 Hz), 149.4 (d,  $^3J_{\text{C-F}}$  = 3.7 Hz), 139.7, 135.0, 128.5, 128.3, 122.9, 94.7 (d,  $^1J_{\text{C-F}}$  = 202.8 Hz), 53.5, 38.0 (d,  $^2J_{\text{C-F}}$  = 24.2 Hz).  $^{19}\text{F NMR}$  (376 MHz,  $\text{CDCl}_3$ )  $\delta$  -164.2. **GC-MS** (EI)  $m/z$  Calcd for  $[\text{C}_{11}\text{H}_8\text{BrFO}_3]^+$ : 286.0, 288.0; found 286.0, 288.0.

**Optical Rotation:**  $[\alpha]_D^{25}$  4.8 ( $c$  = 0.5,  $\text{CHCl}_3$ ). 85% *ee* (HPLC conditions: Chiralpak AD-H column, *n*-Hexane/*i*-PrOH = 90:10, flow rate = 1.0 mL/min, 30 °C, wavelength = 254 nm,  $t_R$  = 8.506 min for major isomer,  $t_R$  = 9.517 min for minor isomer).

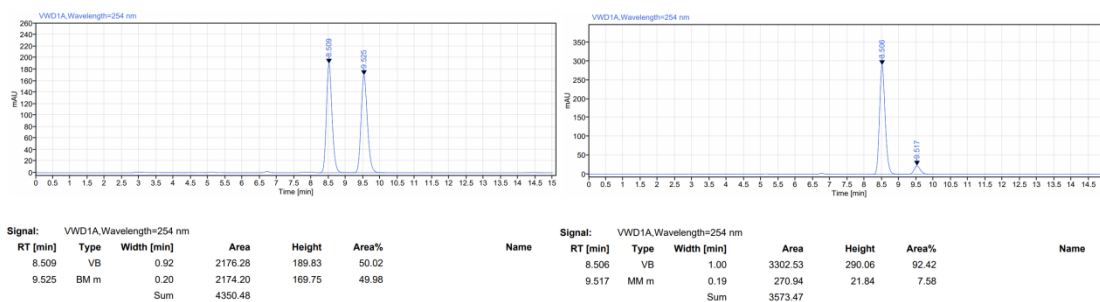

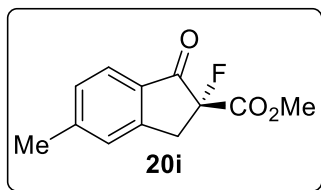

The reaction of the  $\beta$ -keto ester **19i** (40.8 mg, 0.20 mmol, 1.0 equiv.), *m*CPBA (61.8mg, 0.3 mmol, 1.5 equiv.), **Cat-38** (0.03 mmol, 15 mol%),  $\text{NEt}_3 \cdot 3\text{HF}$  (334  $\mu\text{L}$ , 2 mmol, 10 equiv.) in  $\text{CHCl}_3$  (8 mL) at 25 °C for 48 h afforded compound **20i** (21.3 mg) in 48% yield as white solid. The title compound **20i** was isolated through chromatography on silica gel eluting with petroleum ether/ethyl acetate (20/1 to 5/1). ( $R_f$  = 0.6, petroleum ether/ethyl acetate = 5/1).  $^1\text{H NMR}$  (400 MHz,  $\text{CDCl}_3$ )  $\delta$  7.67 (d,  $J$  = 7.9 Hz, 1H), 7.28-7.21 (m, 2H), 3.75 (s, 3H), 3.70 (dd,  $J$  = 17.8, 11.2 Hz, 1H), 3.33 (dd,  $J$  = 23.4, 17.7 Hz, 1H), 2.43 (s, 3H).;  $^{13}\text{C NMR}$  (100 MHz,  $\text{CDCl}_3$ )  $\delta$  194.6 (d,  $^2J_{\text{C-F}}$  = 18.2 Hz), 167.9 (d,  $^2J_{\text{C-F}}$  = 27.9 Hz), 151.4 (d,  $^3J_{\text{C-F}}$  = 3.8 Hz), 148.8, 130.9, 130.1, 127.0, 125.5, 95.0 (d,  $^1J_{\text{C-F}}$  = 201.2 Hz), 53.3, 38.1 (d,  $^2J_{\text{C-F}}$  = 23.9 Hz), 22.4.  $^{19}\text{F NMR}$  (376 MHz,  $\text{CDCl}_3$ )  $\delta$  -164.30. **HRMS** (ESI)  $m/z$  Calcd for  $[\text{C}_{12}\text{H}_{11}\text{FO}_3, \text{M}+\text{Na}]^+$ :245.0584, found 245.0576.

**Optical Rotation:**  $[\alpha]_D^{25}$  -3.5 ( $c$  = 0.5,  $\text{CHCl}_3$ ). 85% *ee* (HPLC conditions: Chiralpak OD-H column, *n*-Hexane/*i*-PrOH = 90:10, flow rate = 1.0 mL/min, 30 °C, wavelength = 254 nm,  $t_R$  = 9.458 min for major isomer,  $t_R$  = 10.943 min for minor isomer).

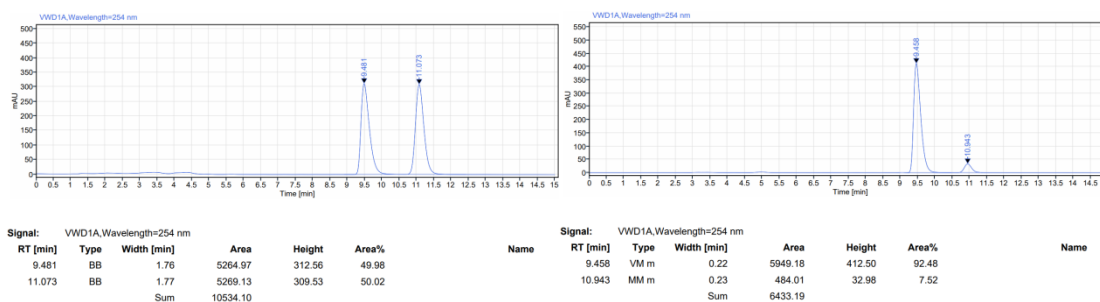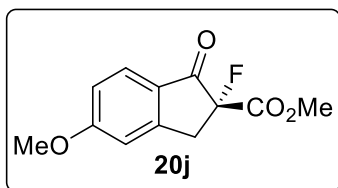

The reaction of the  $\beta$ -keto ester **19j** (44.0 mg, 0.20 mmol, 1.0 equiv.), *m*CPBA (61.8mg, 0.3 mmol, 1.5 equiv.), **Cat-38** (0.03 mmol, 15 mol%),  $\text{NEt}_3 \cdot 3\text{HF}$  (334  $\mu\text{L}$ , 2 mmol, 10 equiv.) in  $\text{CHCl}_3$  (8 mL) at 25 °C for 72 h afforded compound **20j** (21.3 mg) in 50% yield as a white solid. The title compound **20j** was isolated through chromatography on silica gel eluting with petroleum

ether/ethyl acetate (20/1 to 5/1). ( $R_f = 0.6$ , petroleum ether/ethyl acetate = 5/1).  $^1\text{H}$  NMR (400 MHz,  $\text{CDCl}_3$ )  $\delta$  7.77 (d,  $J = 8.6$  Hz, 1H), 6.98 (dd,  $J = 8.6, 2.2$  Hz, 1H), 6.91 (d,  $J = 2.2$  Hz, 1H), 3.92 (s, 3H), 3.81 (s, 3H), 3.75 (dd,  $J = 17.7, 11.0$  Hz, 1H), 3.38 (dd,  $J = 23.0, 17.7$  Hz, 1H).;  $^{13}\text{C}$  NMR (100 MHz,  $\text{CDCl}_3$ )  $\delta$  193.1 (d,  $^2J_{\text{C-F}} = 18.2$  Hz), 168.1 (d,  $^2J_{\text{C-F}} = 28.3$  Hz), 167.0, 154.2 (d,  $^3J_{\text{C-F}} = 3.7$  Hz), 127.7, 126.4, 116.9, 109.9, 95.2 (d,  $^1J_{\text{C-F}} = 201.3$  Hz), 56.1, 53.4, 38.4 (d,  $^2J_{\text{C-F}} = 24.0$  Hz).  $^{19}\text{F}$  NMR (376 MHz,  $\text{CDCl}_3$ )  $\delta$  -163.60. HRMS (ESI)  $m/z$  Calcd for  $[\text{C}_{12}\text{H}_{11}\text{FO}_4, \text{M}+\text{Na}]^+$ :261.0534, found 261.0528

**Optical Rotation:**  $[\alpha]_D^{25}$  37 ( $c = 1$ ,  $\text{CHCl}_3$ ). 83% *ee* (HPLC conditions: Chiralpak AD-H column, *n*-Hexane/*i*-PrOH = 95:5, flow rate = 1.0 mL/min, 30 °C, wavelength = 254 nm,  $t_R = 20.311$  min for minor isomer,  $t_R = 23.065$  min for major isomer).

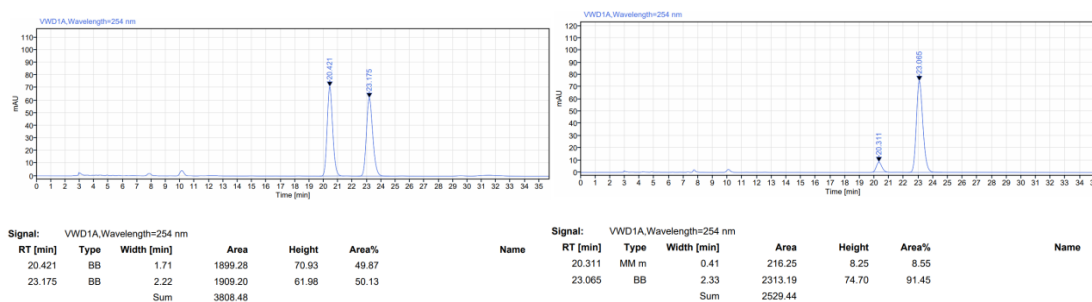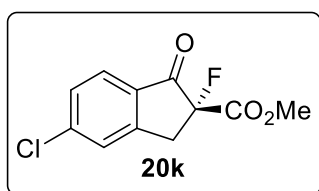

The reaction of the  $\beta$ -keto ester **19k** (44.8 mg, 0.20 mmol, 1.0 equiv.),  $^m\text{CPBA}$  (61.8mg, 0.3 mmol, 1.5 equiv.), **Cat-38** (0.03 mmol, 15 mol%),  $\text{NEt}_3 \cdot 3\text{HF}$  (334  $\mu\text{L}$ , 2 mmol, 10 equiv.) in  $\text{CHCl}_3$  (8 mL) at 25 °C for 48 h afforded compound **20k** (22.3 mg) in 46% yield as a white solid. The title compound **20k** was isolated through chromatography on silica gel eluting with petroleum ether/ethyl acetate (20/1 to 5/1). ( $R_f = 0.6$ , petroleum ether/ethyl acetate = 5/1).  $^1\text{H}$  NMR (400 MHz,  $\text{CDCl}_3$ )  $\delta$  7.75 (d,  $J = 8.2$  Hz, 1H), 7.49 (s, 1H), 7.43 (d,  $J = 10.0$  Hz, 1H), 3.79 (s, 3H), 3.77 (dd,  $J = 17.9, 11.1$  Hz, 1H), 3.40 (dd,  $J = 23.0, 17.8$  Hz, 1H).;  $^{13}\text{C}$  NMR (100 MHz,  $\text{CDCl}_3$ )  $\delta$  193.8 (d,  $^2J_{\text{C-F}} = 18.2$  Hz), 167.4 (d,  $^2J_{\text{C-F}} = 28.2$  Hz), 152.3 (d,  $^3J_{\text{C-F}} = 4.2$  Hz), 143.6, 131.7, 129.7, 127.0, 126.8, 94.6 (d,  $^1J_{\text{C-F}} = 202.4$  Hz), 53.5,

38.0 ( $^2J_{C-F}$ ,  $J = 24.1$  Hz).  $^{19}\text{F}$  NMR (376 MHz,  $\text{CDCl}_3$ )  $\delta$  -164.07. GC-MS (EI)  $m/z$   
 Calcd for  $[\text{C}_{11}\text{H}_8\text{ClFO}]^+$ : 242.0, 244.0; found 242.0, 244.0

**Optical Rotation:**  $[\alpha]_D^{25}$  33 ( $c = 1$ ,  $\text{CHCl}_3$ ). 80% *ee* (HPLC conditions: Chiralpak OD-H column, *n*-Hexane/*i*-PrOH = 90:10, flow rate = 1.0 mL/min, 30 °C, wavelength = 254 nm,  $t_R = 10.818$  min for major isomer,  $t_R = 13.117$  min for minor isomer).

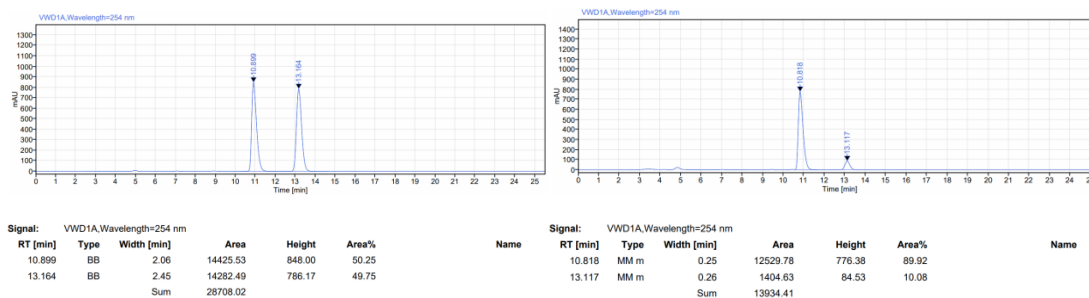

## 8. Investigation of the significance for H-bond interactions and tunable chiral pocket

**Supplementary Table 6.** Investigation of the significance for H-bond interactions and tunable chiral pocket.

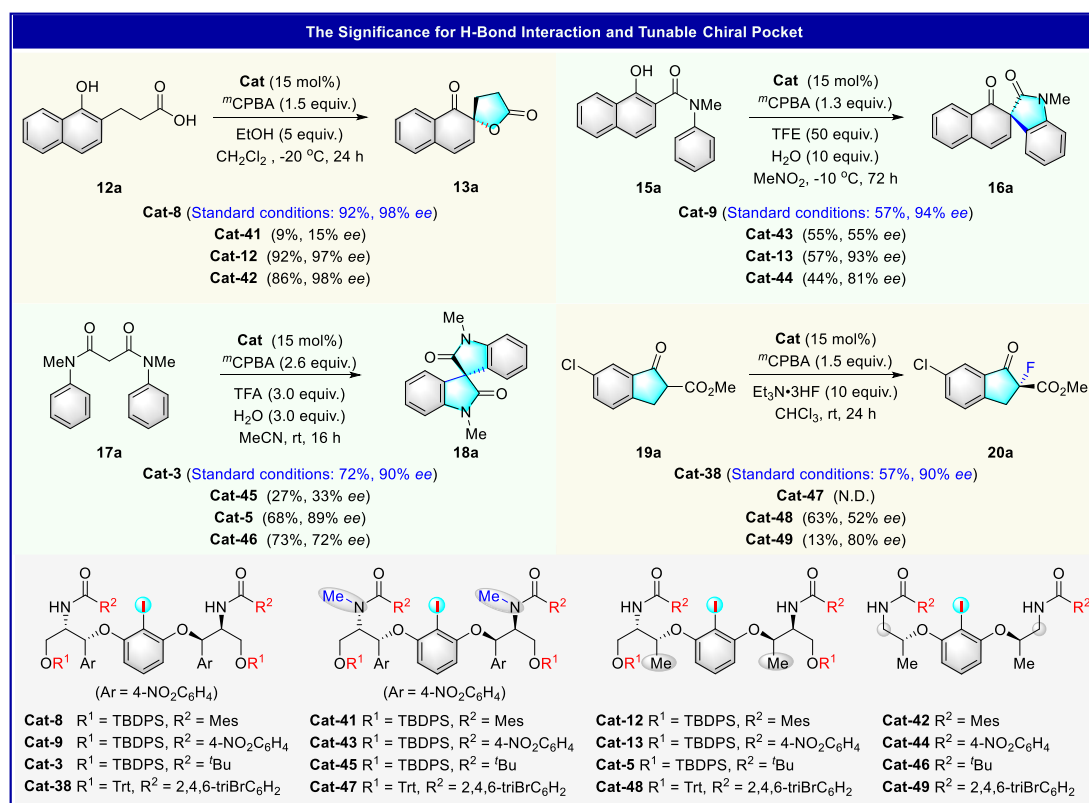

**General procedure for the control experiment of oxidative dearomatization:** To a Schlenk tube containing **Cat** (0.03 mmol, 15 mol%), *m*CPBA (0.3 mmol, 1.5 equiv.) and EtOH (1 mmol, 5 equiv.) were added CH<sub>2</sub>Cl<sub>2</sub> (10 mL) and **12a** (0.2 mmol). The reaction mixture was stirred at -20 °C for 24 hours, which was then quenched in the sequence of saturated Na<sub>2</sub>S<sub>2</sub>O<sub>3</sub> and NaHCO<sub>3</sub> aqueous solution. The organic layer was subsequently extracted with dichloromethane, washed with brine, dried over anhydrous Na<sub>2</sub>SO<sub>4</sub>. Finally, the mixture was concentrated in vacuo and then the residue was purified by silica gel column chromatography to afford the product **13a**.

Experiment of oxidative dearomatization using **Cat-41**: 15% ee (HPLC conditions: Chiralpak AS-H column, *n*-Hexane/*i*-PrOH = 85:15, flow rate = 1.0 mL/min, 30 °C,

wavelength = 254 nm,  $t_R$  = 39.989 min for major isomer,  $t_R$  = 44.491 min for minor isomer)

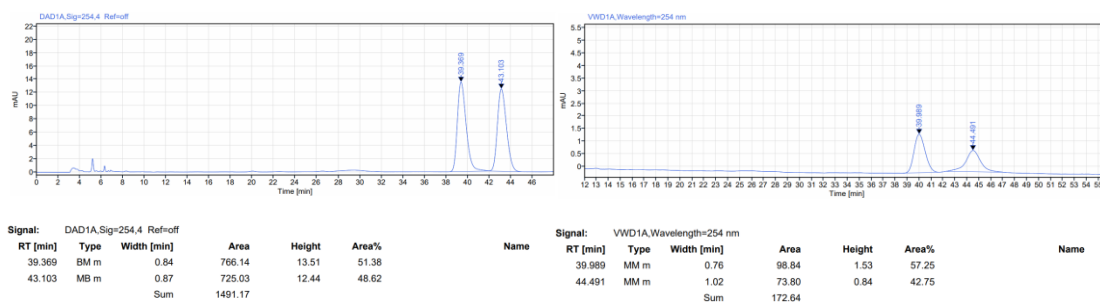

Experiment of oxidative dearomatization using **Cat-12**: 97% *ee* (HPLC conditions: Chiralpak AS-H column, *n*-Hexane/*i*-PrOH = 85:15, flow rate = 1.0 mL/min, 30 °C, wavelength = 254 nm,  $t_R$  = 40.588 min for major isomer,  $t_R$  = 44.669 min for minor isomer)

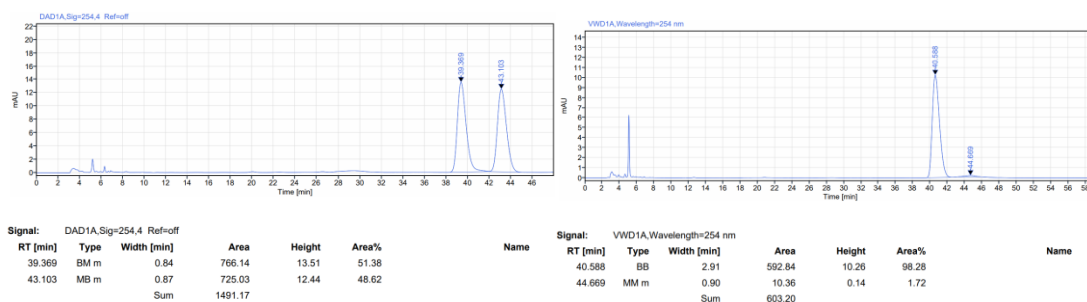

**General procedure for the control experiment of oxidative spirolactonization.** To a Schlenk tube containing **Cat** (0.03 mmol, 15 mol%), *m*CPBA (0.26 mmol, 1.3 equiv.), TFE (10 mmol, 50 equiv.), H<sub>2</sub>O (2 mmol, 10 equiv.) and MeNO<sub>2</sub> (3 mL) were added **15a** (0.2 mmol). The reaction mixture was stirred at -10 °C for 72 hours, which was then quenched in the sequence of saturated Na<sub>2</sub>S<sub>2</sub>O<sub>3</sub> and NaHCO<sub>3</sub> aqueous solution. Finally, the organic layer was subsequently extracted with ethyl acetate, washed with brine, dried over anhydrous Na<sub>2</sub>SO<sub>4</sub>. The mixture was concentrated *in vacuo* and then the residue was purified by silica gel column chromatography to afford the product **16a**.

Experiment of oxidative spirolactonization using **Cat-43**: 55% *ee* (HPLC conditions: Chiralpak AD-H column, *n*-Hexane/*i*-PrOH = 70:30, flow rate = 1.0 mL/min, 30 °C, wavelength = 254 nm,  $t_R$  = 7.651 min for minor isomer,  $t_R$  = 11.785 min for major isomer).

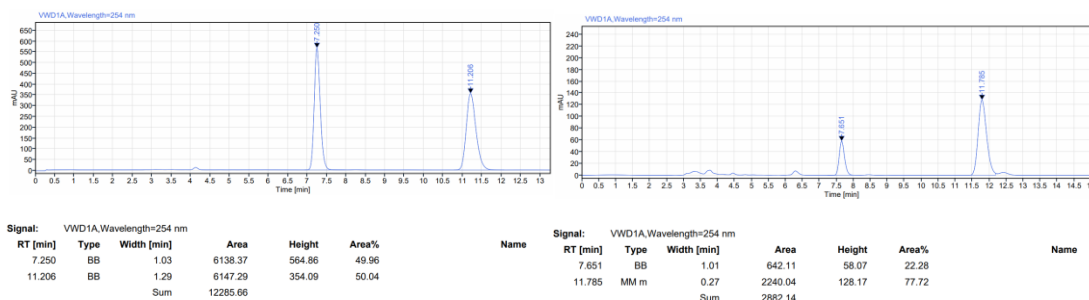

Experiment of oxidative spirolactonization using **Cat-13**: 93% *ee* (HPLC conditions: Chiralpak AD-H column, *n*-Hexane/*i*-PrOH = 70:30, flow rate = 1.0 mL/min, 30 °C, wavelength = 254 nm,  $t_R$  = 7.675 min for minor isomer,  $t_R$  = 11.887 min for major isomer).

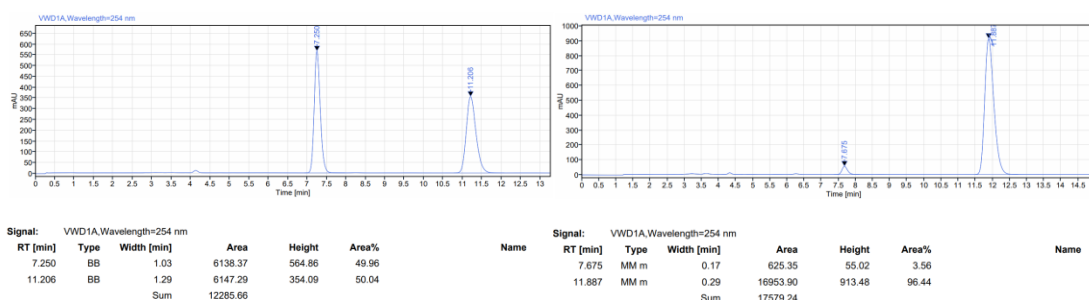

Experiment of oxidative spirolactonization using **Cat-44**: 81% *ee* (HPLC conditions: Chiralpak AD-H column, *n*-Hexane/*i*-PrOH = 70:30, flow rate = 1.0 mL/min, 30 °C, wavelength = 254 nm,  $t_R$  = 7.174 min for minor isomer,  $t_R$  = 10.864 min for major isomer).

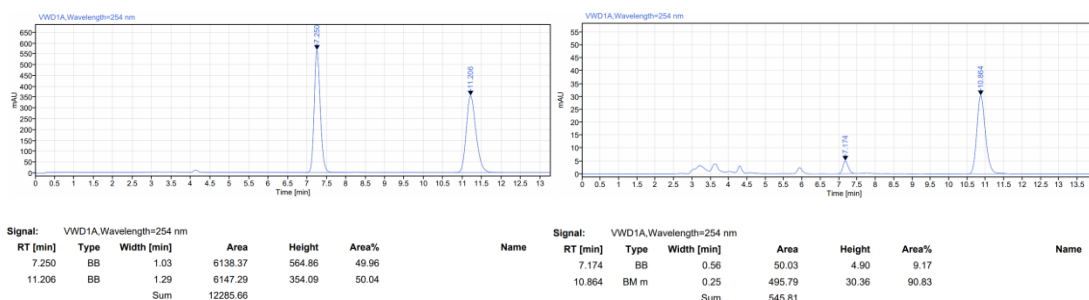



**General procedure for the control experiment of direct C(sp<sup>2</sup>)-H/C(sp<sup>3</sup>)-H cross-coupling.** To a Schlenk tube containing **Cat** (0.03 mmol, 15 mol%), *m*CPBA (0.52 mmol, 2.6 equiv.), TFA (0.6 mmol, 3 equiv.) and H<sub>2</sub>O (0.6 mmol, 3 equiv.) and MeCN (3 mL) were added **17a** (0.2 mmol). The reaction mixture was stirred at 25 °C for 16 hours, which was then quenched in the sequence of saturated Na<sub>2</sub>S<sub>2</sub>O<sub>3</sub> and NaHCO<sub>3</sub> aqueous solution. The organic layer was subsequently extracted with ethyl acetate, washed with brine, dried over anhydrous Na<sub>2</sub>SO<sub>4</sub>. Finally, the mixture was concentrated *in vacuo* and then the residue was purified by silica gel column chromatography to afford the product **18a**.

Experiment of direct C(sp<sup>2</sup>)-H/C(sp<sup>3</sup>)-H cross-coupling using **Cat-45**: 33% *ee* (HPLC conditions: Chiralpak OD-H column, *n*-Hexane/*i*-PrOH = 70:30, flow rate = 1.0 mL/min, 30 °C, wavelength = 254 nm, t<sub>R</sub> = 11.907 min for major isomer, t<sub>R</sub> = 27.393 min for minor isomer).

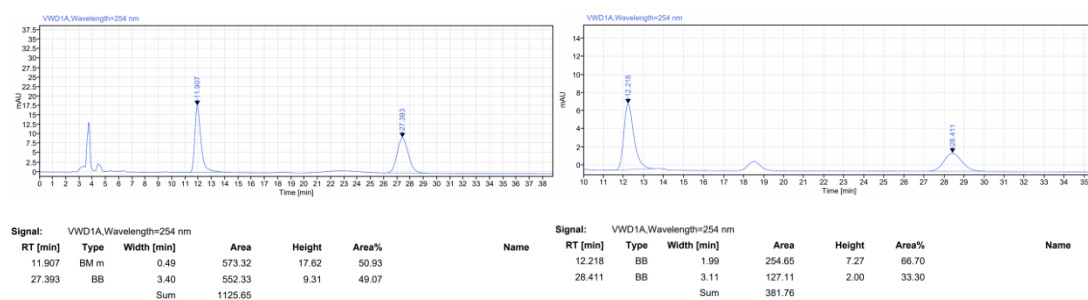

Experiment of direct C(sp<sup>2</sup>)-H/C(sp<sup>3</sup>)-H cross-coupling using **Cat-5**: 89% *ee* (HPLC conditions: Chiralpak OD-H column, *n*-Hexane/*i*-PrOH = 70:30, flow rate = 1.0 mL/min, 30 °C, wavelength = 254 nm, t<sub>R</sub> = 11.770 min for major isomer, t<sub>R</sub> = 27.268 min for minor isomer).

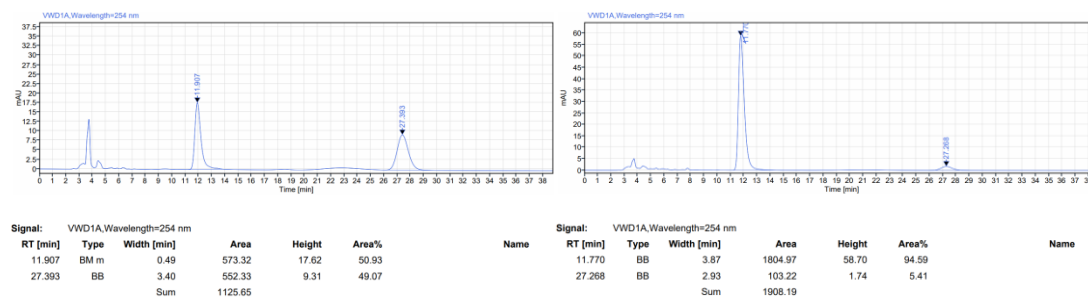

Experiment of direct C(sp<sup>2</sup>)-H/C(sp<sup>3</sup>)-H cross-coupling using **Cat-46**: 72% *ee* (HPLC conditions: Chiralpak OD-H column, *n*-Hexane/*i*-PrOH = 70:30, flow rate = 1.0 mL/min, 30 °C, wavelength = 254 nm, *t<sub>R</sub>* = 12.011 min for major isomer, *t<sub>R</sub>* = 28.677min for minor isomer).

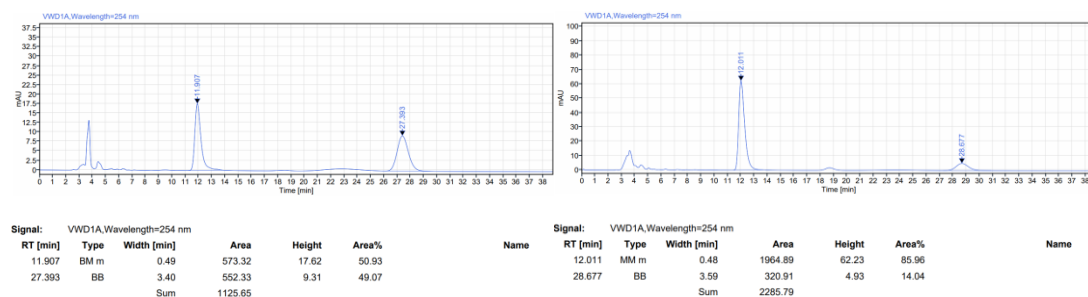

**General procedure for the control experiment of fluorinated keto esters.** To 25 mL Teflon tube containing  $\beta$ -ketoesters **19a** (0.20 mmol), **Cat** (0.03 mmol, 15 mol%), and CHCl<sub>3</sub> (8 mL) were added. Subsequently, NEt<sub>3</sub>·3HF (2 mmol, 10 equiv.) and <sup>m</sup>CPBA (0.3 mmol, 1.5 equiv.) was loaded in turn. The reaction mixture was stirred at 25 °C for 24 hours, which was then quenched in the sequence of saturated Na<sub>2</sub>S<sub>2</sub>O<sub>3</sub> and NaHCO<sub>3</sub> aqueous solution. The organic layer was subsequently extracted with dichloromethane, washed with brine, dried over anhydrous Na<sub>2</sub>SO<sub>4</sub>. Finally, the mixture was concentrated *in vacuo* and then the residue was purified by silica gel column chromatography to afford desired products **20a**.

Experiment of fluorinated keto esters using **Cat-48**: 80% *ee* (HPLC conditions: Chiralpak OD-H column, *n*-Hexane/*i*-PrOH = 95:5, flow rate = 1.0 mL/min, 30 °C, wavelength = 254 nm, *t<sub>R</sub>* = 15.839 min for major isomer, *t<sub>R</sub>* = 16.792 min for minor isomer).

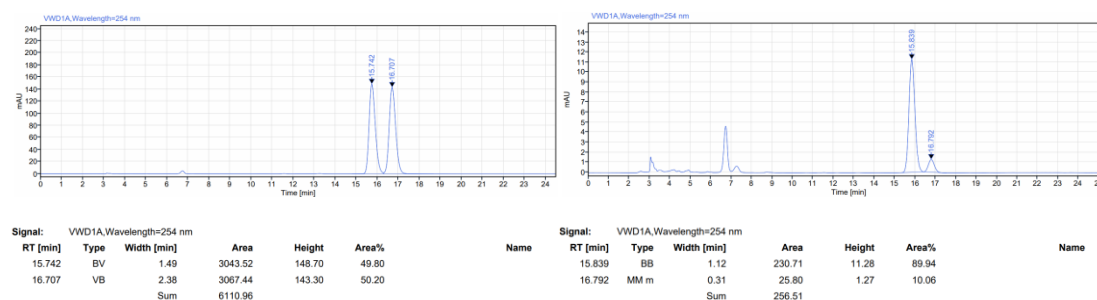

Experiment of fluorinated keto esters using **Cat-49**: 52% *ee* (HPLC conditions: Chiralpak OD-H column, *n*-Hexane/*i*-PrOH = 95:5, flow rate = 1.0 mL/min, 30 °C, wavelength = 254 nm,  $t_R$  = 15.804 min for major isomer,  $t_R$  = 16.775 min for minor isomer).

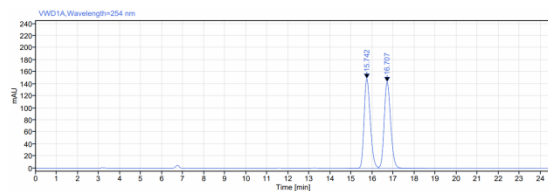

| Signal: VWD1A, Wavelength=254 nm |      |             |         |        |       | Name |
|----------------------------------|------|-------------|---------|--------|-------|------|
| RT [min]                         | Type | Width [min] | Area    | Height | Area% |      |
| 15.742                           | BV   | 1.49        | 3043.52 | 148.70 | 49.80 |      |
| 16.707                           | VB   | 2.38        | 3067.44 | 143.30 | 50.20 |      |
|                                  | Sum  |             | 6110.96 |        |       |      |

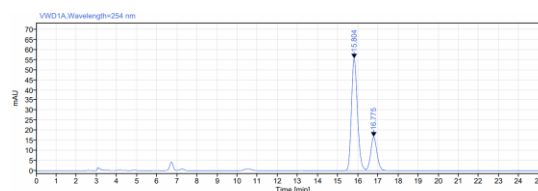

| Signal: VWD1A, Wavelength=254 nm |      |             |         |        |       | Name |
|----------------------------------|------|-------------|---------|--------|-------|------|
| RT [min]                         | Type | Width [min] | Area    | Height | Area% |      |
| 15.804                           | BM m | 0.32        | 1151.15 | 55.41  | 76.13 |      |
| 16.775                           | MM m | 0.34        | 360.97  | 16.59  | 23.87 |      |
|                                  | Sum  |             | 1512.12 |        |       |      |

## 9. Possible mechanism for the reactions

### 9.1 Possible mechanism DFT Calculation of the enantioselective oxidative dearomatization.

**Supplementary scheme 1.** Proposed mechanism for enantioselective oxidative dearomatization.

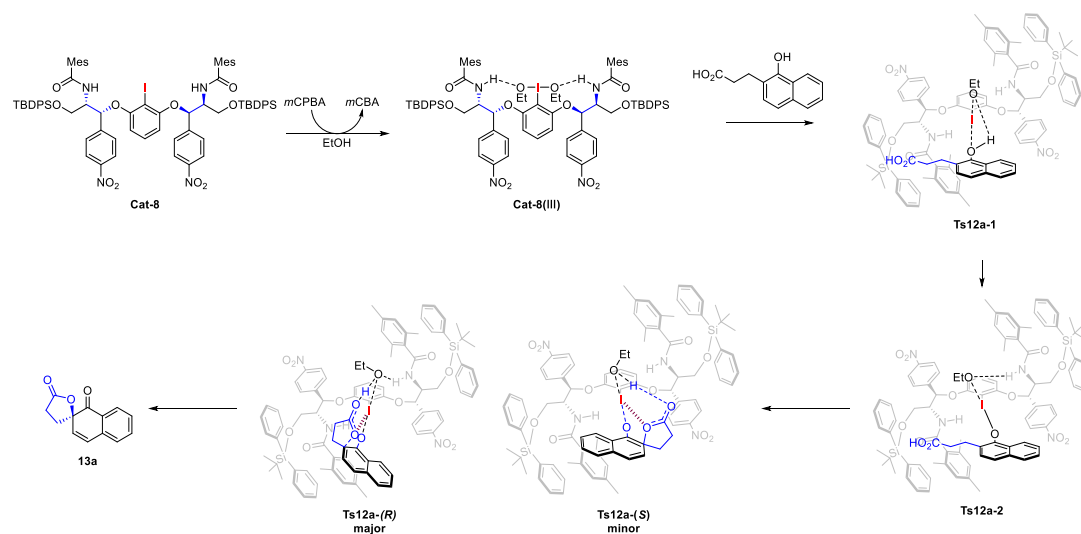

The proposed mechanism for enantioselective oxidative dearomatization is depicted in **Supplementary scheme 1**. First, conformationally flexible aryl iodide **ArI** (**Cat-8**) was oxidated to the active catalyst **ArI<sup>III</sup>** (**Cat-8(III)**) which shows the formation of a C<sub>2</sub>-symmetric helical chiral environment around the iodine(III) center after forming intramolecular hydrogen bonds between the amide proton and ethoxy ligand. By attending of naphthol, **Ts12a-1** is formed, followed by naphtholate iodine(III) intermediate **Ts12a-2** which is obtained *via* naphthol oxygen attacking. After passing through the transition state, the product mainly presents *R* enantiomer. Because the aromatic moiety of the mesityl group can adjust its direction to enhance  $\pi$ - $\pi$  stacking interaction with the naphthol, and the substrate can fit in the helical chiral environment which gives additional stabilization to **Ts12a-(R)**. The steric repulsion of the mesityl group and the hydrogen bonds created by additives contribute to nucleophilic attack of the carboxylic acid group on *Si* face of the naphthol.

Otherwise, nucleophilic attack of the carboxyl group on *Re* face of the naphthol ruin the helical chiral environment, and it leads to the poor stabilization of the transition state (**Ts12a-S**), so it shows major *R* enantiomer of the product.<sup>[7,16]</sup>

**Supplementary scheme 2.** Reaction mechanism of Kita reaction calculated by DFT.

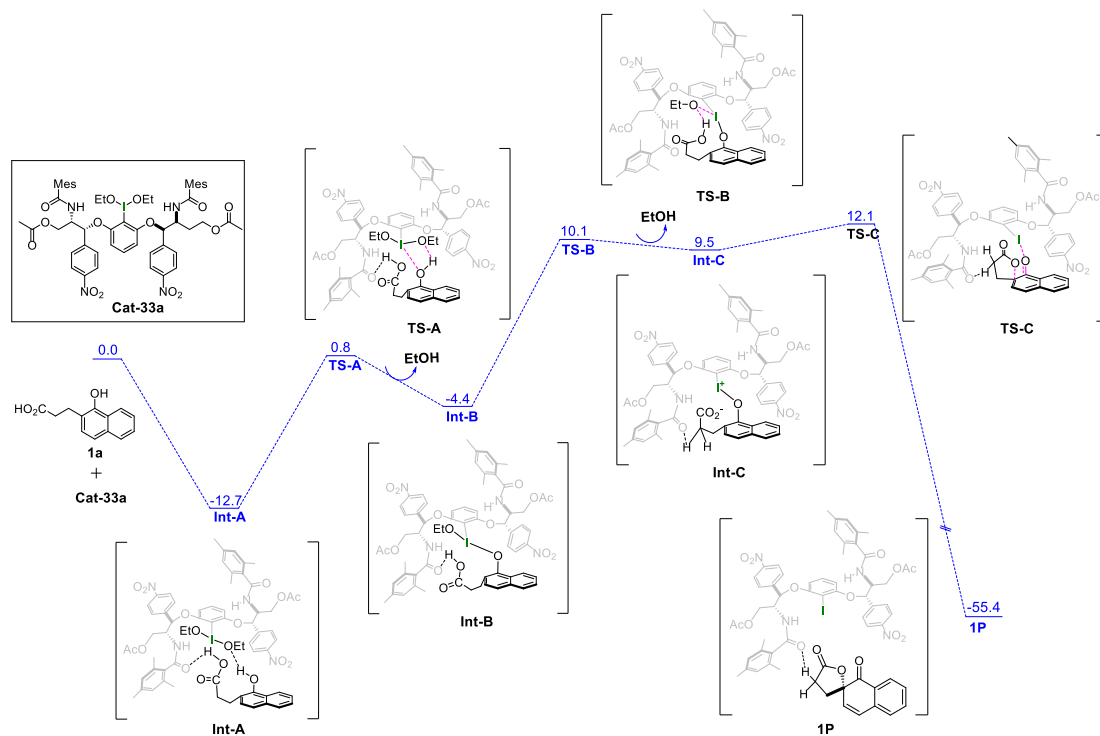

Density functional theory (DFT) studies were performed to study reaction mechanism, as shown in **Supplementary scheme 2**. The formation of iodine(III) intermediate **Int-B** is kinetically viable through **TS-A** ( $\Delta G^\ddagger$ : 13.5 kcal/mol). The following proton transfer step occurs to generate **Int-C**, with a reaction barrier of 15.5 kcal/mol (**Int-B** to **TS-B**). Finally, the cyclization occurs to produce **1P** via **TS-C** ( $\Delta G^\ddagger$ : 2.6 kcal/mol). This mechanistic process is similar with the reaction route calculated by Xue's group.<sup>[16]</sup>

## 9.2 Possible mechanism of the asymmetric spirocyclization reaction.

**Supplementary scheme 3.** Proposed mechanism for enantioselective oxidative spirocyclization.

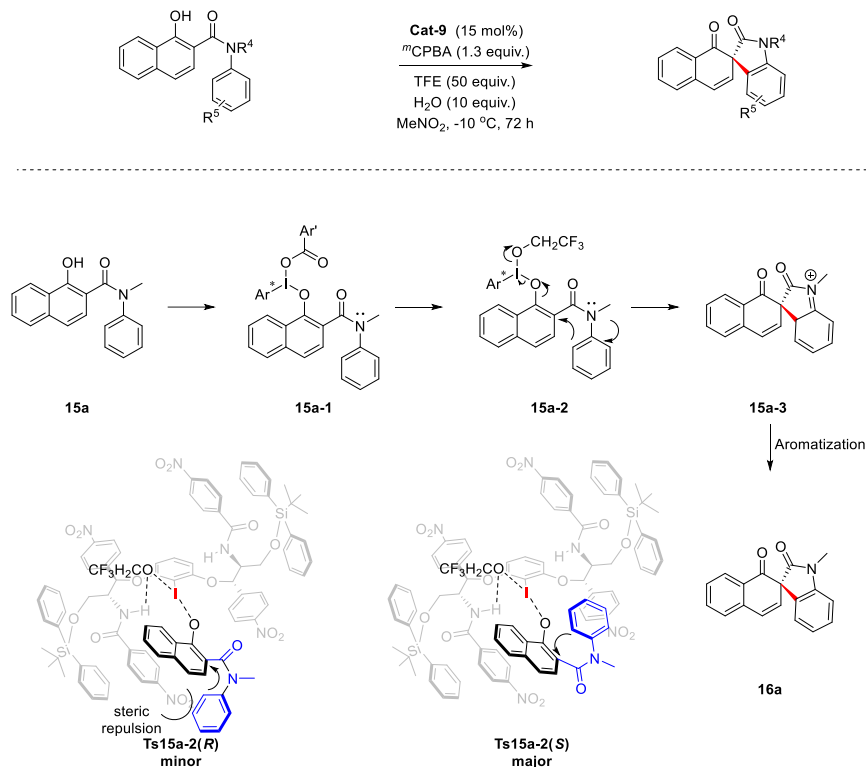

The plausible reaction mechanism of oxidative spirocyclization is proposed in **Supplementary scheme 3**. The chiral aryl iodine **Cat-9** is oxidized into a hypervalent phenyl- $\lambda^3$ -iodane by *m*CPBA. Subsequent formation of naphtholate iodine(III) **15a-1** is carried out by attacking of naphthol oxygen. Then ligand exchange with 2,2,2-trifluoroethanol and water is undergoing to generate **15a-2**. The configuration of the product is mainly determined by the transition state **Ts15a-2**. Since *p*-nitrobenzamide can changes its orientation to enhance the  $\pi$ - $\pi$  interaction between *p*-nitrobenzamide and naphthamide moiety, the substrate is fit to the helical chiral environment which increases the enantioselectivities. In this transition state, the *Si* face of the naphthamide moiety is open for the nucleophilic attack of the benzene. In contrast, the *Re* face is blocked by *p*-nitrobenzamide moiety in catalyst, contributing to the major *S* enantiomer of the product. The resulting compound **15a-3** is rearomatized to get the final product **16a**.<sup>[10]</sup>

### 9.3 Possible mechanism of the direct C(sp<sup>2</sup>)-H/C(sp<sup>3</sup>)-H oxidative cross-coupling.

**Supplementary scheme 4.** Proposed mechanism for the direct C(sp<sup>2</sup>)-H/C(sp<sup>3</sup>)-H cross-coupling.

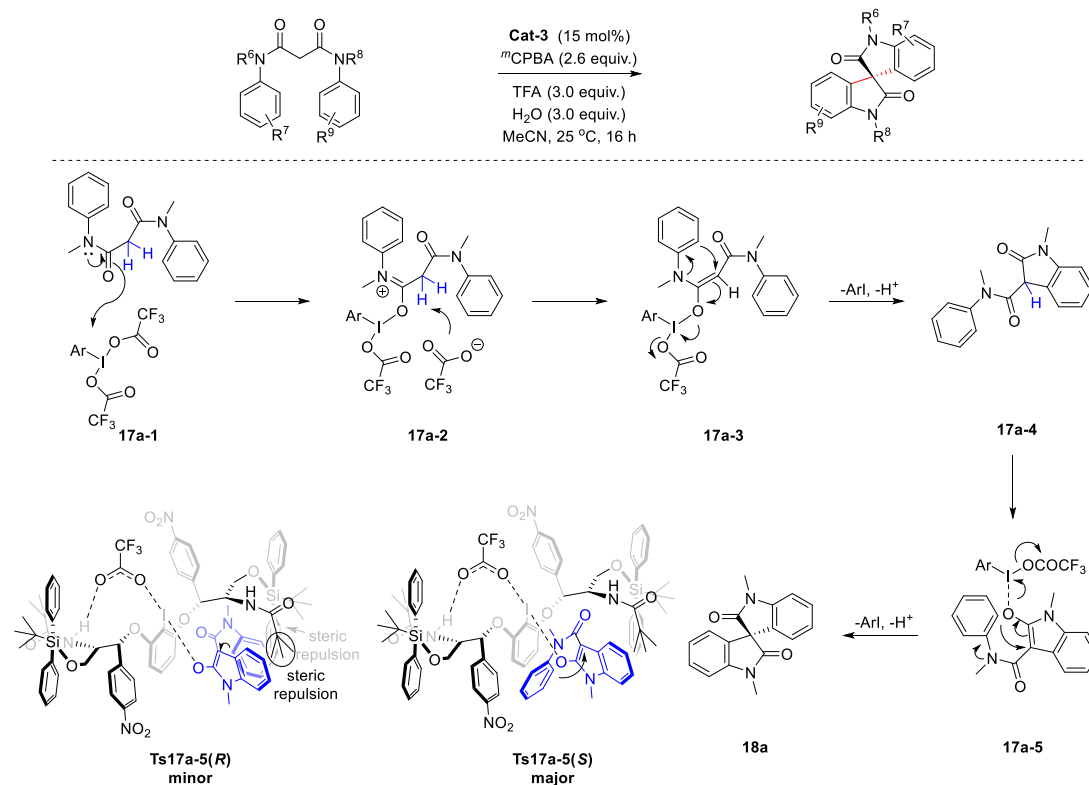

The plausible mechanism of direct C(sp<sup>2</sup>)-H/C(sp<sup>3</sup>)-H cross-coupling is depicted in **Supplementary scheme 4**. First, the chiral aryl iodide **Cat-3** is oxidized into a hypervalent phenyl-λ<sup>3</sup>-iodane by *m*CPBA. Then nucleophilic attack on the iodine center by the carbonyl oxygen in **17a** affords intermediate **17a-2**. After capturing α-proton by the generated trifluoroacetate anion, enamine **17a-3** is undergoing the electrocyclic ring closure, along with the cleavage of the I-O bond, and occurs in oxindole **17a-4**. Then another nucleophilic attack on the iodine center is taking place on the carbonyl oxygen to form intermediate **17a-5**, and result in the electrocyclic ring closure to form product **18a**. The configuration of the product is mainly determined by the transition state **Ts17a-5**. Comparing to the results demonstrated by **Cat-5** and **Cat-46** in scheme 5, we find substituent on side arm (CH<sub>2</sub>OTBDPS) plays key role in enantioselectivities. Combining optimization of catalysts, we presumed that the moiety of the substrate is remote from the bulky tertiary butyl substituent and benzene ring of the catalyst, and the *Si* face of the 2-indololate moiety is open to nucleophilic

attack by the benzene ring on substrate, thus favorably giving **18a**. In contrast, the *Re* face of the 2-indololate moiety is shielded by the bulky tertiary butyl substituent and benzene ring on catalyst, thus leading to the generation of the enantiomer in a minor amount.<sup>[11,17]</sup>

#### 9.4 Possible mechanism for the asymmetric oxidative fluorination of keto esters.

**Supplementary scheme 5.** Proposed mechanism for the oxidative fluorination of keto esters.

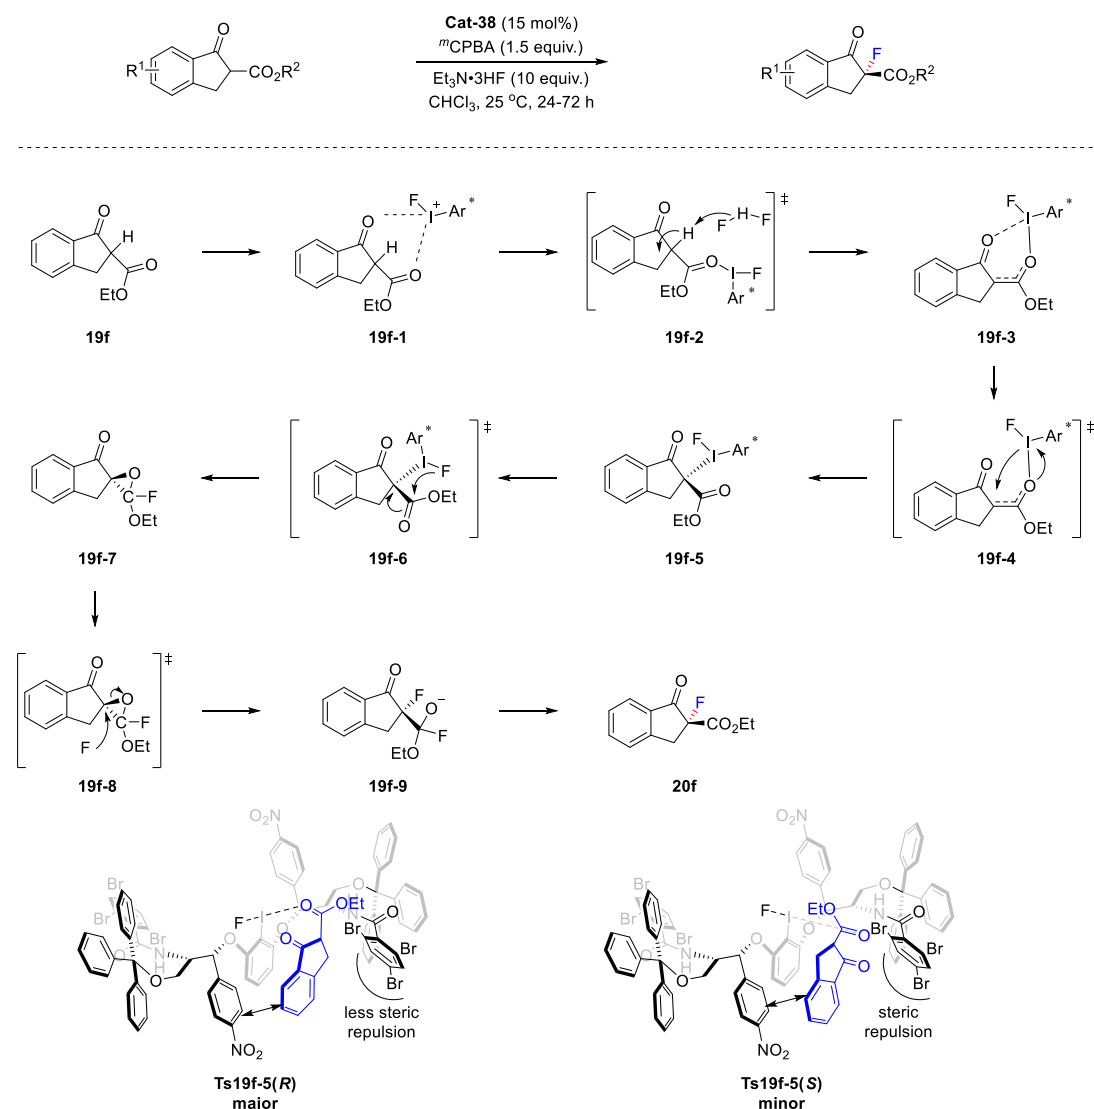

The hypothesized mechanism for the oxidative fluorination of keto esters is presented in **Supplementary scheme 5**. The first step involves the reaction of the enol form of substrate **19f** with hypervalent iodine to abstract the H atom from **19f** via the transition state **19f-1** and **19f-2** with formation of an O-I bonded hypervalent



iodine intermediate **19f-3**. Then hypervalent iodine intermediate **19f-5** which is enantioselectivity determining transition state is formed *via* transfer of the hypervalent iodine fragment from the carboxylic O atom to the  $\alpha$ -C atom through **19f-4**. The optimization of catalysts in Supplementary Table 4 shows that bulky substituent especially aromatic ring to modify amino groups is good for enantioselectivities. And the results demonstrated by **Cat-38** and **Cat-48** in scheme 5 present nitrobenzene on catalyst is essential to enantioselectivities as well. Thus, we presumed the carbonyl moiety of the indanone is remote from the bulky substituent which bring by tribromobenzene of the catalyst, and the enough distance between benzene ring of the indanone and nitrobenzene enhance  $\pi$ - $\pi$  stacking interaction, leading to the adaptation of the substrate in the helical chiral environment. *R* configuration at the  $\alpha$ -C atom of substrate is more likely to generate. In contrast, the benzene moiety of the indanone is shielded bulky tribromobenzene moiety, thus making the (*S*) configuration disfavored and leading to the generation of the enantiomer in a minor amount. After formation of hemiacetale intermediate **19f-7** which involves inversion of configuration at the  $\alpha$ -C atom through the transition state **19f-6**, fluoride anion is attacking on the epoxide ring (**19f-8**) to form a configuration of **19f-9** which further generated product **20f**.<sup>[12]</sup>

## 10. Reference

- [1] Zhao, Y. & Truhlar, D.G. The M06 suite of density functionals for main group thermochemistry, thermochemical kinetics, noncovalent interactions, excited states, and transition elements. *Theor. Chem. Acc.* 2008, **120**, 215-241.
- [2] Lee, C., Yang, W. & Parr, G. Development of the colle-salvetti correlation-energy formula into a functional of the electron density. *Phys. Rev. B* 1988, **37**, 785-789.
- [3] Pritchard, B. P., Altarawy, D., Didier, B., Gibson, T. D., & Windus, T. L. A new basis set exchange: an open, up-to-date resource for the molecular sciences community. *J. Chem. Inf. Model.* 2019, **59**, 4814-4820.
- [4] Fukui, K. Formulation of the reaction coordinate. *J. Phys. Chem.* 1970, **74**, 4161-4163.

- [5] Fukui, K. The path of chemical reactions - the IRC approach. *Acc. Chem. Res.* 1981, **14**, 363-368.
- [6] Frisch, M. J., Trucks, G. W., Schlegel, H. B., Scuseria, G. E., Robb, M. A., Cheeseman, J. R., Scalmani, G., Barone, V., Petersson, G. A., Nakatsuji, H., Li, X., Caricato, M., Marenich, A. V., Bloino, J., Janesko, B. G., Gomperts, R., Mennucci, B., Hratchian, H. P., Ortiz, J. V., Izmaylov, A. F., Sonnenberg, J. L., Williams-Young, D., Ding, F., Lipparini, F., Egidi, F., Goings, J., Peng, B., Petrone, A., Henderson, T., Ranasinghe, D., Zakrzewski, V. G., Gao, J., Rega, N., Zheng, G., Liang, W., Hada, M., Ehara, M., Toyota, K., Fukuda, R., Hasegawa, J., Ishida, M., Nakajima, T., Honda, Y., Kitao, O., Nakai, H., Vreven, T., Throssell, K., Montgomery, J. A. Jr., Peralta, J. E., Ogliaro, F., Bearpark, M. J., Heyd, J. J., Brothers, E. N., Kudin, K. N., Staroverov, V. N., Keith, T. A., Kobayashi, R., Normand, J., Raghavachari, K., Rendell, A. P., Burant, J. C., Iyengar, S. S., Tomasi, J., Cossi, M., Millam, J. M., Klene, M., Adamo, C., Cammi, R., Ochterski, J. W., Martin, R. L., Morokuma, K., Farkas, O., Foresman, J. B. & Fox, D. J. Gaussian 16, Revision A.03, Gaussian: Wallingford, CT, USA, 2016.
- [7] M. Uyanik, T. Yasui, and K. Ishihara, Enantioselective Kita oxidative spirocyclization catalyzed by in situ generated chiral hypervalent iodine(III) species. *Angew. Chem. Int. Ed.* 2010, **49**, 2175–2177.
- [8] M. Uyanik, T. Yasui and K. Ishihara, Chiral hypervalent organoiodine-catalyzed enantioselective oxidative spirocyclization of naphthol derivatives. *J. Org. Chem.* 2010, **82**, 11946–11953.
- [9] N. Jain, S. Xu and M. A. Ciufolini, Asymmetric oxidative cycloetherification of naphtholic alcohols. *Chem. Eur. J.* 2017, **23**: 4542–4546.
- [10] D. Y. Zhang, L. Xu, H. Wu and L. Z. Gong, Chiral iodine-catalyzed dearomatizative spirocyclization for the enantioselective construction of an all-carbon stereogenic center. *Chem. Eur. J.* 2015, **21**, 10314–10317.
- [11] H. Wu, Y. P. He, L. Xu, D. Y. Zhang and L. Z. Gong, Asymmetric organocatalytic direct C(sp<sup>2</sup>)-H/C(sp<sup>3</sup>)-H oxidative cross-coupling by chiral iodine reagent. *Angew. Chem. Int. Ed.* 2014, **53**, 3466–3469.

- [12] R. Pluta, P. E. Krach, L. Cavallo, L. Falivene and M. Rueping, Metal-free catalytic asymmetric fluorination of keto esters using a combination of hydrogen fluoride (HF) and oxidant: experiment and computation. *ACS Catal.* 2018, **8**, 2582–2588.
- [13] M. Teiichi, F. Kiyotaka, T. Tadakazu, Y. Kazuyoshi and N. Masazumi, Synthesis and biological properties of novel sphingosine derivatives. *Bioorg. Med. Chem. Lett.* 2015, **15**, 1115–1119.
- [14] J. F. Bower, P. Szeto and T. Gallagher, Enantiopure 1,4-benzoxazines via 1,2-cyclic sulfamidates. Synthesis of levofloxacin. *Org. Lett.* 2007, **9**, 3283–3286.
- [15] E. Butler, L. Florentino, D. Cornut, G. Gomez-Campillos, H. Liu, A. C. Regan and E. J. Thomas, Synthesis of macrocyclic precursors of the vioprolides. *Org. Biomol. Chem.* 2018, **16**, 6935–6960.
- [16] H. Zheng, L. Cai, M. Pan, M. Uyanik, K. Ishihara, and X. Xue, Catalyst-Substrate helical character matching determines the enantioselectivity in the Ishihara-Type iodoarenes catalyzed asymmetric kita-Deaomative spiro-lactonization. *J. Am. Chem. Soc.* 2023, **145**, 7301-7312.
- [17] J. Wang, Y. Yuan, R. Xiong, D. Zhang-Negrerie, Y. Du, and K. Zhao, Phenyl iodine bis(trifluoroacetate)-mediated oxidative C–C bond formation: Synthesis of 3-hydroxy-2-oxindoles and spirooxindoles from anilides. *Org. Lett.* 2012, **14(9)**, 2210–2213.

## 11. X-ray crystallography analysis

### Cat-8 (CCDC 2236217)

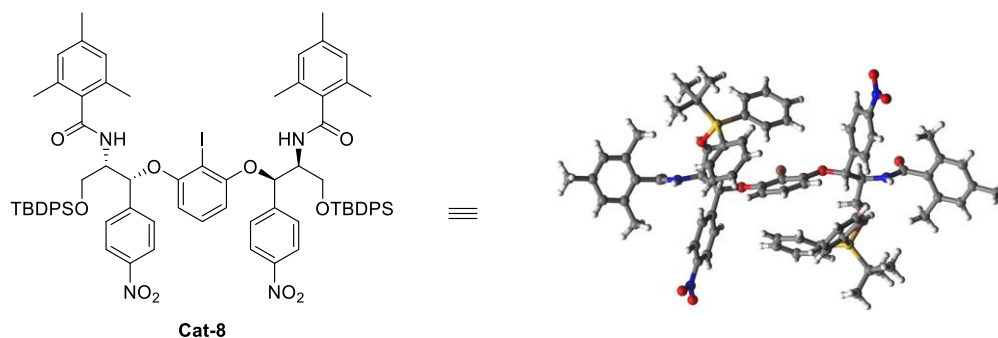

### checkCIF/PLATON report

Structure factors have been supplied for datablock(s) mo\_230104\_zhj\_mes

THIS REPORT IS FOR GUIDANCE ONLY. IF USED AS PART OF A REVIEW PROCEDURE FOR PUBLICATION, IT SHOULD NOT REPLACE THE EXPERTISE OF AN EXPERIENCED CRYSTALLOGRAPHIC REFEREE.

No syntax errors found. CIF dictionary Interpreting this report

### Datablock: mo\_230104\_zhj\_mes

Bond precision: C-C = 0.0042 A Wavelength=0.71073  
Cell: a=13.3936 (3) b=27.4740 (6) c=9.5840 (2)  
alpha=90 beta=90 gamma=90  
Temperature: 170 K

|                        | Calculated           | Reported             |
|------------------------|----------------------|----------------------|
| Volume                 | 3526.68 (13)         | 3526.68 (13)         |
| Space group            | P 21 21 2            | P 21 21 2            |
| Hall group             | P 2 2ab              | P 2 2ab              |
| Moiety formula         | C76 H81 I N4 O10 Si2 | C76 H81 I N4 O10 Si2 |
| Sum formula            | C76 H81 I N4 O10 Si2 | C76 H81 I N4 O10 Si2 |
| Mr                     | 1393.53              | 1393.52              |
| Dx, g cm <sup>-3</sup> | 1.312                | 1.312                |
| Z                      | 2                    | 2                    |
| Mu (mm <sup>-1</sup> ) | 0.549                | 0.549                |
| F000                   | 1452.0               | 1452.0               |
| F000'                  | 1451.95              |                      |
| h, k, lmax             | 17, 35, 12           | 17, 35, 12           |
| Nref                   | 8135 [ 4559]         | 8123                 |
| Tmin, Tmax             | 0.810, 0.848         | 0.679, 0.746         |
| Tmin'                  | 0.768                |                      |

Correction method= # Reported T Limits: Tmin=0.679 Tmax=0.746  
AbsCorr = MULTI-SCAN

Data completeness= 1.78/1.00 Theta (max)= 27.495

R(reflections)= 0.0245 ( 7539)

wR2(reflections)=  
0.0584 ( 8123)

S = 1.046

Npar= 470

---

The following ALERTS were generated. Each ALERT has the format  
**test-name\_ALERT\_alert-type\_alert-level**.  
Click on the hyperlinks for more details of the test.

---

**Alert level C**

|                   |                  |                        |                     |       |     |        |
|-------------------|------------------|------------------------|---------------------|-------|-----|--------|
| PLAT220_ALERT_2_C | NonSolvent       | Resd 1 C               | Ueq(max)/Ueq(min)   | Range | 4.3 | Ratio  |
| PLAT222_ALERT_3_C | NonSolvent       | Resd 1 H               | Uiso(max)/Uiso(min) | Range | 4.1 | Ratio  |
| PLAT911_ALERT_3_C | Missing FCF Refl | Between Thmin & STh/L= | 0.600               |       | 3   | Report |

---

**Alert level G**

|                   |                                                  |               |  |  |        |        |
|-------------------|--------------------------------------------------|---------------|--|--|--------|--------|
| PLAT002_ALERT_2_G | Number of Distance or Angle Restraints on AtSite |               |  |  | 13     | Note   |
| PLAT003_ALERT_2_G | Number of Uiso or Uij Restrained non-H Atoms ... |               |  |  | 9      | Report |
| PLAT007_ALERT_5_G | Number of Unrefined Donor-H Atoms .....          |               |  |  | 1      | Report |
| PLAT176_ALERT_4_G | The CIF-Embedded .res File Contains SADI Records |               |  |  | 15     | Report |
| PLAT178_ALERT_4_G | The CIF-Embedded .res File Contains SIMU Records |               |  |  | 1      | Report |
| PLAT188_ALERT_3_G | A Non-default SIMU Restraint Value has been used |               |  |  | 0.0200 | Report |
| PLAT191_ALERT_3_G | A Non-default SADI Restraint Value has been used |               |  |  | 0.0400 | Report |
| PLAT191_ALERT_3_G | A Non-default SADI Restraint Value has been used |               |  |  | 0.0400 | Report |
| PLAT191_ALERT_3_G | A Non-default SADI Restraint Value has been used |               |  |  | 0.0400 | Report |
| PLAT191_ALERT_3_G | A Non-default SADI Restraint Value has been used |               |  |  | 0.0400 | Report |
| PLAT191_ALERT_3_G | A Non-default SADI Restraint Value has been used |               |  |  | 0.0400 | Report |
| PLAT191_ALERT_3_G | A Non-default SADI Restraint Value has been used |               |  |  | 0.0400 | Report |
| PLAT191_ALERT_3_G | A Non-default SADI Restraint Value has been used |               |  |  | 0.0400 | Report |
| PLAT191_ALERT_3_G | A Non-default SADI Restraint Value has been used |               |  |  | 0.0400 | Report |
| PLAT191_ALERT_3_G | A Non-default SADI Restraint Value has been used |               |  |  | 0.0400 | Report |
| PLAT301_ALERT_3_G | Main Residue Disorder .....                      | (Resd 1 )     |  |  | 13%    | Note   |
| PLAT791_ALERT_4_G | Model has Chirality at C5                        | (Sohnke SpGr) |  |  | R      | Verify |
| PLAT791_ALERT_4_G | Model has Chirality at C12                       | (Sohnke SpGr) |  |  | S      | Verify |
| PLAT860_ALERT_3_G | Number of Least-Squares Restraints .....         |               |  |  | 111    | Note   |
| PLAT910_ALERT_3_G | Missing # of FCF Reflection(s) Below Theta(Min). |               |  |  | 2      | Note   |
| PLAT912_ALERT_4_G | Missing # of FCF Reflections Above STh/L=        | 0.600         |  |  | 1      | Note   |
| PLAT933_ALERT_2_G | Number of HKL-OMIT Records in Embedded .res File |               |  |  | 3      | Note   |
| PLAT978_ALERT_2_G | Number C-C Bonds with Positive Residual Density. |               |  |  | 9      | Info   |

---

0 **ALERT level A** = Most likely a serious problem - resolve or explain  
0 **ALERT level B** = A potentially serious problem, consider carefully  
3 **ALERT level C** = Check. Ensure it is not caused by an omission or oversight  
22 **ALERT level G** = General information/check it is not something unexpected

0 ALERT type 1 CIF construction/syntax error, inconsistent or missing data  
5 ALERT type 2 Indicator that the structure model may be wrong or deficient  
14 ALERT type 3 Indicator that the structure quality may be low  
5 ALERT type 4 Improvement, methodology, query or suggestion  
1 ALERT type 5 Informative message, check

---

## Supplementary Figure 5. Single-crystal X-ray crystallography of Cat-8

## 11 (CCDC 2236218)

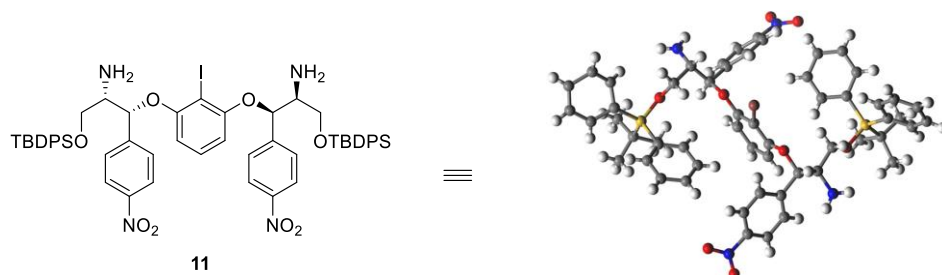

### checkCIF/PLATON report

Structure factors have been supplied for datablock(s) mo\_230103\_zhj\_nh2\_0m

THIS REPORT IS FOR GUIDANCE ONLY. IF USED AS PART OF A REVIEW PROCEDURE FOR PUBLICATION, IT SHOULD NOT REPLACE THE EXPERTISE OF AN EXPERIENCED CRYSTALLOGRAPHIC REFEREE.

No syntax errors found. CIF dictionary Interpreting this report

### Datablock: mo\_230103\_zhj\_nh2\_0m

Bond precision: C-C = 0.0087 Å Wavelength=0.71073  
Cell: a=28.216 (9) b=13.252 (2) c=14.528 (3)  
alpha=90 beta=90 gamma=90  
Temperature: 170 K

|                        | Calculated          | Reported            |
|------------------------|---------------------|---------------------|
| Volume                 | 5432 (2)            | 5432 (2)            |
| Space group            | P 21 21 2           | P 21 21 2           |
| Hall group             | P 2 2ab             | P 2 2ab             |
| Moiety formula         | C56 H60 I N4 O8 Si2 | C56 H60 I N4 O8 Si2 |
| Sum formula            | C56 H60 I N4 O8 Si2 | C56 H61 I N4 O8 Si2 |
| Mr                     | 1100.16             | 1101.16             |
| Dx, g cm <sup>-3</sup> | 1.345               | 1.346               |
| Z                      | 4                   | 4                   |
| Mu (mm <sup>-1</sup> ) | 0.690               | 0.690               |
| F000                   | 2276.0              | 2280.0              |
| F000'                  | 2275.63             |                     |
| h, k, lmax             | 39, 18, 20          | 38, 18, 20          |
| Nref                   | 16096 [ 8799]       | 15884               |
| Tmin, Tmax             | 0.767, 0.813        | 0.663, 0.746        |
| Tmin'                  | 0.718               |                     |

Correction method= # Reported T Limits: Tmin=0.663 Tmax=0.746  
AbsCorr = MULTI-SCAN

Data completeness= 1.81/0.99 Theta (max)= 30.159

R(reflections)= 0.0439 ( 11790) wR2(reflections)=  
S = 1.035 Npar= 811 0.1185 ( 15884)

The following ALERTS were generated. Each ALERT has the format  
**test-name\_ALERT\_alert-type\_alert-level.**  
Click on the hyperlinks for more details of the test.

**Alert level C**

|                   |                                                  |                         |              |
|-------------------|--------------------------------------------------|-------------------------|--------------|
| PLAT041_ALERT_1_C | Calc. and Reported SumFormula                    | Strings Differ          | Please Check |
| PLAT068_ALERT_1_C | Reported F000 Differs from Calcd (or Missing)... |                         | Please Check |
| PLAT220_ALERT_2_C | NonSolvent Resd 1 C                              | Ueq(max)/Ueq(min) Range | 3.5 Ratio    |
| PLAT234_ALERT_4_C | Large Hirshfeld Difference                       | C17 --C18               | 0.17 Ang.    |
| PLAT241_ALERT_2_C | High 'MainMol' Ueq as Compared to Neighbors of   |                         | C16 Check    |
| PLAT241_ALERT_2_C | High 'MainMol' Ueq as Compared to Neighbors of   |                         | C18 Check    |
| PLAT241_ALERT_2_C | High 'MainMol' Ueq as Compared to Neighbors of   |                         | C24 Check    |
| PLAT241_ALERT_2_C | High 'MainMol' Ueq as Compared to Neighbors of   |                         | C47 Check    |
| PLAT242_ALERT_2_C | Low 'MainMol' Ueq as Compared to Neighbors of    |                         | C10 Check    |
| PLAT242_ALERT_2_C | Low 'MainMol' Ueq as Compared to Neighbors of    |                         | C14 Check    |
| PLAT242_ALERT_2_C | Low 'MainMol' Ueq as Compared to Neighbors of    |                         | C35 Check    |
| PLAT342_ALERT_3_C | Low Bond Precision on C-C Bonds .....            |                         | 0.00868 Ang. |
| PLAT415_ALERT_2_C | Short Inter D-H..H-X                             | H1B ..H36C              | 2.05 Ang.    |
|                   |                                                  | x,y,l+z =               | 1_556 Check  |
| PLAT420_ALERT_2_C | D-H Bond Without Acceptor                        | N1 --H1A                | Please Check |
| PLAT420_ALERT_2_C | D-H Bond Without Acceptor                        | N1 --H1B                | Please Check |
| PLAT420_ALERT_2_C | D-H Bond Without Acceptor                        | N3 --H3A                | Please Check |
| PLAT420_ALERT_2_C | D-H Bond Without Acceptor                        | N3 --H3B                | Please Check |
| PLAT934_ALERT_3_C | Number of (Iobs-Icalc)/Sigma(W) > 10 Outliers .. |                         | 1 Check      |
| PLAT975_ALERT_2_C | Check Calcd Resid. Dens.                         | 1.08Ang From C7         | 0.52 eA-3    |

**Alert level G**

FORMU01\_ALERT\_1\_G There is a discrepancy between the atom counts in the  
\_chemical\_formula\_sum and \_chemical\_formula\_moiety. This is  
usually due to the moiety formula being in the wrong format.  
Atom count from \_chemical\_formula\_sum: C56 H61 I1 N4 O8 Si2  
Atom count from \_chemical\_formula\_moiety:C56 H60 I1 N4 O8 Si2

FORMU01\_ALERT\_2\_G There is a discrepancy between the atom counts in the  
\_chemical\_formula\_sum and the formula from the \_atom\_site\* data.  
Atom count from \_chemical\_formula\_sum:C56 H61 I1 N4 O8 Si2  
Atom count from the \_atom\_site data: C56 H60 I1 N4 O8 Si2

CELLZ01\_ALERT\_1\_G Difference between formula and atom\_site contents detected.  
CELLZ01\_ALERT\_1\_G WARNING: H atoms missing from atom site list. Is this intentional?  
From the CIF: \_cell\_formula\_units\_Z 4  
From the CIF: \_chemical\_formula\_sum C56 H61 I N4 O8 Si2  
TEST: Compare cell contents of formula and atom\_site data

| atom | Z*formula | cif sites | diff |
|------|-----------|-----------|------|
| C    | 224.00    | 224.00    | 0.00 |
| H    | 244.00    | 240.00    | 4.00 |
| I    | 4.00      | 4.00      | 0.00 |
| N    | 16.00     | 16.00     | 0.00 |
| O    | 32.00     | 32.00     | 0.00 |
| Si   | 8.00      | 8.00      | 0.00 |

|                   |                                                  |    |        |
|-------------------|--------------------------------------------------|----|--------|
| PLAT002_ALERT_2_G | Number of Distance or Angle Restraints on AtSite | 40 | Note   |
| PLAT003_ALERT_2_G | Number of Uiso or Uij Restrained non-H Atoms ... | 39 | Report |
| PLAT007_ALERT_5_G | Number of Unrefined Donor-H Atoms .....          | 4  | Report |
| PLAT172_ALERT_4_G | The CIF-Embedded .res File Contains DFIX Records | 1  | Report |
| PLAT176_ALERT_4_G | The CIF-Embedded .res File Contains SADI Records | 44 | Report |

|                   |                                                  |               |   |       |        |        |
|-------------------|--------------------------------------------------|---------------|---|-------|--------|--------|
| PLAT178_ALERT_4_G | The CIF-Embedded .res File Contains SIMU Records |               |   |       | 3      | Report |
| PLAT188_ALERT_3_G | A Non-default SIMU Restraint Value has been used |               |   |       | 0.0200 | Report |
| PLAT188_ALERT_3_G | A Non-default SIMU Restraint Value has been used |               |   |       | 0.0100 | Report |
| PLAT188_ALERT_3_G | A Non-default SIMU Restraint Value has been used |               |   |       | 0.0100 | Report |
| PLAT191_ALERT_3_G | A Non-default SADI Restraint Value has been used |               |   |       | 0.0400 | Report |
| PLAT191_ALERT_3_G | A Non-default SADI Restraint Value has been used |               |   |       | 0.0400 | Report |
| PLAT191_ALERT_3_G | A Non-default SADI Restraint Value has been used |               |   |       | 0.0400 | Report |
| PLAT191_ALERT_3_G | A Non-default SADI Restraint Value has been used |               |   |       | 0.0400 | Report |
| PLAT191_ALERT_3_G | A Non-default SADI Restraint Value has been used |               |   |       | 0.0400 | Report |
| PLAT191_ALERT_3_G | A Non-default SADI Restraint Value has been used |               |   |       | 0.0400 | Report |
| PLAT191_ALERT_3_G | A Non-default SADI Restraint Value has been used |               |   |       | 0.0400 | Report |
| PLAT191_ALERT_3_G | A Non-default SADI Restraint Value has been used |               |   |       | 0.0400 | Report |
| PLAT191_ALERT_3_G | A Non-default SADI Restraint Value has been used |               |   |       | 0.0400 | Report |
| PLAT191_ALERT_3_G | A Non-default SADI Restraint Value has been used |               |   |       | 0.0400 | Report |
| PLAT191_ALERT_3_G | A Non-default SADI Restraint Value has been used |               |   |       | 0.0400 | Report |
| PLAT191_ALERT_3_G | A Non-default SADI Restraint Value has been used |               |   |       | 0.0400 | Report |
| PLAT191_ALERT_3_G | A Non-default SADI Restraint Value has been used |               |   |       | 0.0400 | Report |
| PLAT191_ALERT_3_G | A Non-default SADI Restraint Value has been used |               |   |       | 0.0400 | Report |
| PLAT191_ALERT_3_G | A Non-default SADI Restraint Value has been used |               |   |       | 0.0400 | Report |
| PLAT191_ALERT_3_G | A Non-default SADI Restraint Value has been used |               |   |       | 0.0400 | Report |
| PLAT191_ALERT_3_G | A Non-default SADI Restraint Value has been used |               |   |       | 0.0400 | Report |
| PLAT191_ALERT_3_G | A Non-default SADI Restraint Value has been used |               |   |       | 0.0400 | Report |
| PLAT191_ALERT_3_G | A Non-default SADI Restraint Value has been used |               |   |       | 0.0400 | Report |
| PLAT191_ALERT_3_G | A Non-default SADI Restraint Value has been used |               |   |       | 0.0400 | Report |
| PLAT191_ALERT_3_G | A Non-default SADI Restraint Value has been used |               |   |       | 0.0400 | Report |
| PLAT191_ALERT_3_G | A Non-default SADI Restraint Value has been used |               |   |       | 0.0400 | Report |
| PLAT191_ALERT_3_G | A Non-default SADI Restraint Value has been used |               |   |       | 0.0400 | Report |
| PLAT191_ALERT_3_G | A Non-default SADI Restraint Value has been used |               |   |       | 0.0400 | Report |
| PLAT191_ALERT_3_G | A Non-default SADI Restraint Value has been used |               |   |       | 0.0400 | Report |
| PLAT191_ALERT_3_G | A Non-default SADI Restraint Value has been used |               |   |       | 0.0400 | Report |
| PLAT191_ALERT_3_G | A Non-default SADI Restraint Value has been used |               |   |       | 0.0400 | Report |
| PLAT191_ALERT_3_G | A Non-default SADI Restraint Value has been used |               |   |       | 0.0400 | Report |
| PLAT191_ALERT_3_G | A Non-default SADI Restraint Value has been used |               |   |       | 0.0400 | Report |
| PLAT191_ALERT_3_G | A Non-default SADI Restraint Value has been used |               |   |       | 0.0400 | Report |
| PLAT191_ALERT_3_G | A Non-default SADI Restraint Value has been used |               |   |       | 0.0400 | Report |
| PLAT191_ALERT_3_G | A Non-default SADI Restraint Value has been used |               |   |       | 0.0400 | Report |
| PLAT191_ALERT_3_G | A Non-default SADI Restraint Value has been used |               |   |       | 0.0400 | Report |
| PLAT191_ALERT_3_G | A Non-default SADI Restraint Value has been used |               |   |       | 0.0400 | Report |
| PLAT191_ALERT_3_G | A Non-default SADI Restraint Value has been used |               |   |       | 0.0400 | Report |
| PLAT191_ALERT_3_G | A Non-default SADI Restraint Value has been used |               |   |       | 0.0400 | Report |
| PLAT191_ALERT_3_G | A Non-default SADI Restraint Value has been used |               |   |       | 0.0400 | Report |
| PLAT191_ALERT_3_G | A Non-default SADI Restraint Value has been used |               |   |       | 0.0400 | Report |
| PLAT191_ALERT_3_G | A Non-default SADI Restraint Value has been used |               |   |       | 0.0400 | Report |
| PLAT191_ALERT_3_G | A Non-default SADI Restraint Value has been used |               |   |       | 0.0400 | Report |
| PLAT191_ALERT_3_G | A Non-default SADI Restraint Value has been used |               |   |       | 0.0400 | Report |
| PLAT191_ALERT_3_G | A Non-default SADI Restraint Value has been used |               |   |       | 0.0400 | Report |
| PLAT191_ALERT_3_G | A Non-default SADI Restraint Value has been used |               |   |       | 0.0400 | Report |
| PLAT191_ALERT_3_G | A Non-default SADI Restraint Value has been used |               |   |       | 0.0400 | Report |
| PLAT191_ALERT_3_G | A Non-default SADI Restraint Value has been used |               |   |       | 0.0400 | Report |
| PLAT301_ALERT_3_G | Main Residue Disorder .....(Resd 1 )             |               |   |       | 25%    | Note   |
| PLAT367_ALERT_2_G | Long? C(sp?)-C(sp?) Bond C7                      | - C8          | . |       | 1.55   | Ang.   |
| PLAT410_ALERT_2_G | Short Intra H...H Contact H28                    | ..H48         | . |       | 2.08   | Ang.   |
|                   |                                                  | x,y,z =       |   | 1_555 |        | Check  |
| PLAT410_ALERT_2_G | Short Intra H...H Contact H34B                   | ..H40A        | . |       | 2.03   | Ang.   |
|                   |                                                  | x,y,z =       |   | 1_555 |        | Check  |
| PLAT410_ALERT_2_G | Short Intra H...H Contact H44A                   | ..H46         | . |       | 1.93   | Ang.   |
|                   |                                                  | x,y,z =       |   | 1_555 |        | Check  |
| PLAT412_ALERT_2_G | Short Intra XH3 .. XHn H37C                      | ..H44         | . |       | 2.12   | Ang.   |
|                   |                                                  | x,y,z =       |   | 1_555 |        | Check  |
| PLAT789_ALERT_4_G | Atoms with Negative _atom_site_disorder_group #  |               |   |       | 26     | Check  |
| PLAT791_ALERT_4_G | Model has Chirality at C8                        | (Sohnke SpGr) |   |       | S      | Verify |
| PLAT791_ALERT_4_G | Model has Chirality at C32                       | (Sohnke SpGr) |   |       | R      | Verify |
| PLAT791_ALERT_4_G | Model has Chirality at C33                       | (Sohnke SpGr) |   |       | S      | Verify |
| PLAT811_ALERT_5_G | No ADDSYM Analysis: Too Many Excluded Atoms .... |               |   |       | !      | Info   |
| PLAT860_ALERT_3_G | Number of Least-Squares Restraints .....         |               |   |       | 585    | Note   |
| PLAT910_ALERT_3_G | Missing # of FCF Reflection(s) Below Theta(Min). |               |   |       | 4      | Note   |
| PLAT912_ALERT_4_G | Missing # of FCF Reflections Above STh/L= 0.600  |               |   |       | 20     | Note   |
| PLAT933_ALERT_2_G | Number of HKL-OMIT Records in Embedded .res File |               |   |       | 1      | Note   |
| PLAT978_ALERT_2_G | Number C-C Bonds with Positive Residual Density. |               |   |       | 1      | Info   |

---

0 **ALERT level A** = Most likely a serious problem - resolve or explain  
0 **ALERT level B** = A potentially serious problem, consider carefully  
19 **ALERT level C** = Check. Ensure it is not caused by an omission or oversight  
53 **ALERT level G** = General information/check it is not something unexpected

5 ALERT type 1 CIF construction/syntax error, inconsistent or missing data

24 ALERT type 2 Indicator that the structure model may be wrong or deficient  
32 ALERT type 3 Indicator that the structure quality may be low  
9 ALERT type 4 Improvement, methodology, query or suggestion  
2 ALERT type 5 Informative message, check

---

## Supplementary Figure 6. Single-crystal X-ray crystallography of 11



## 12. $^1\text{H}$ , $^{13}\text{C}$ , $^{19}\text{F}$ spectrum of compounds

### 12.1 NMR spectra of intermediates and catalyst

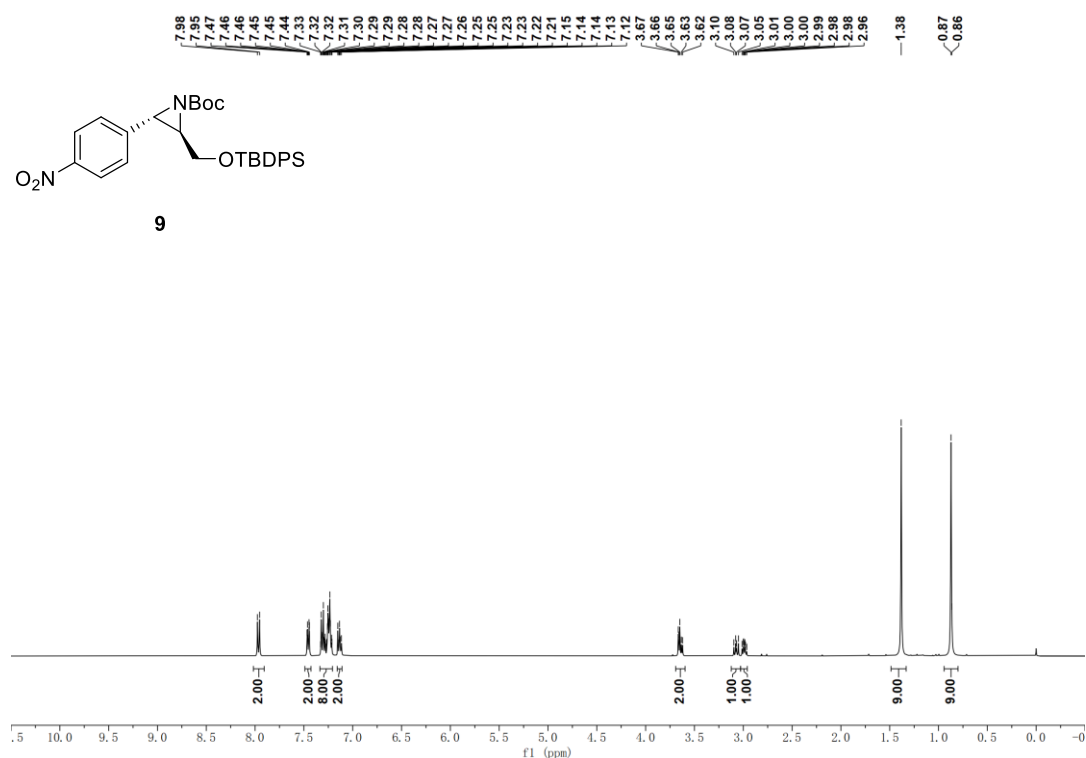

Supplementary Figure 7.  $^1\text{H}$  NMR Spectrum of **9** (400 MHz,  $\text{CDCl}_3$ )

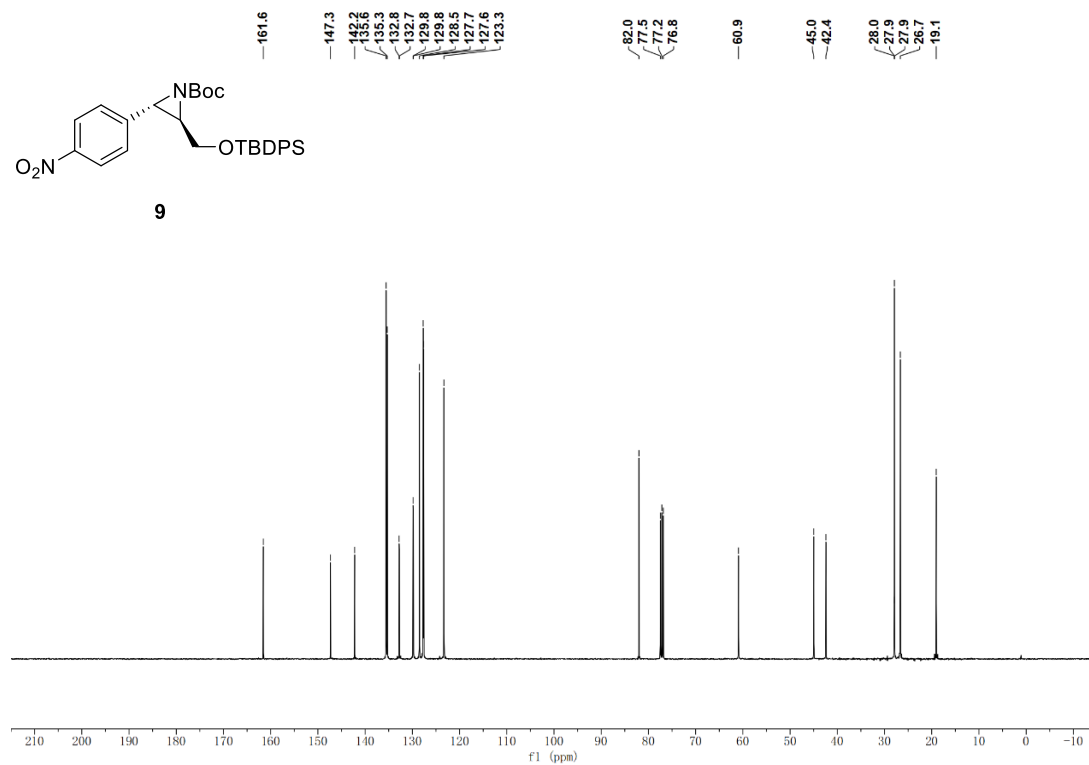

Supplementary Figure 8.  $^{13}\text{C}$  NMR Spectrum of **9** (100 MHz,  $\text{CDCl}_3$ )

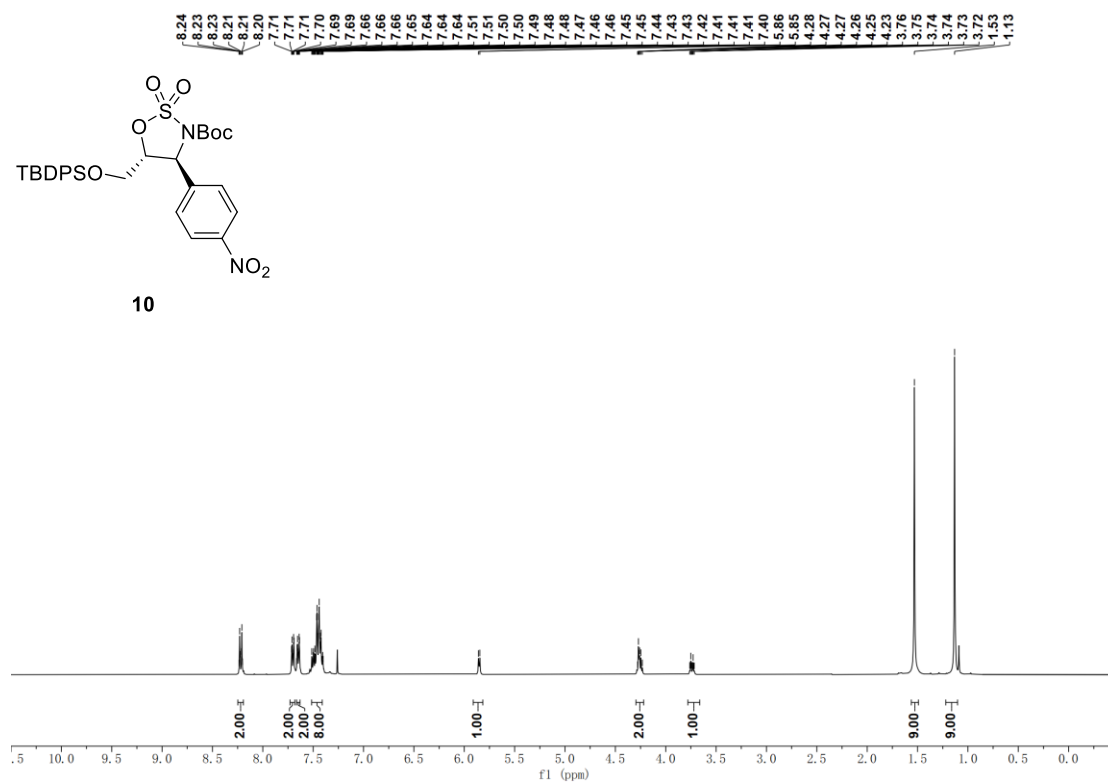

**Supplementary Figure 9.**  $^1\text{H}$  NMR Spectrum of **10** (400 MHz,  $\text{CDCl}_3$ )

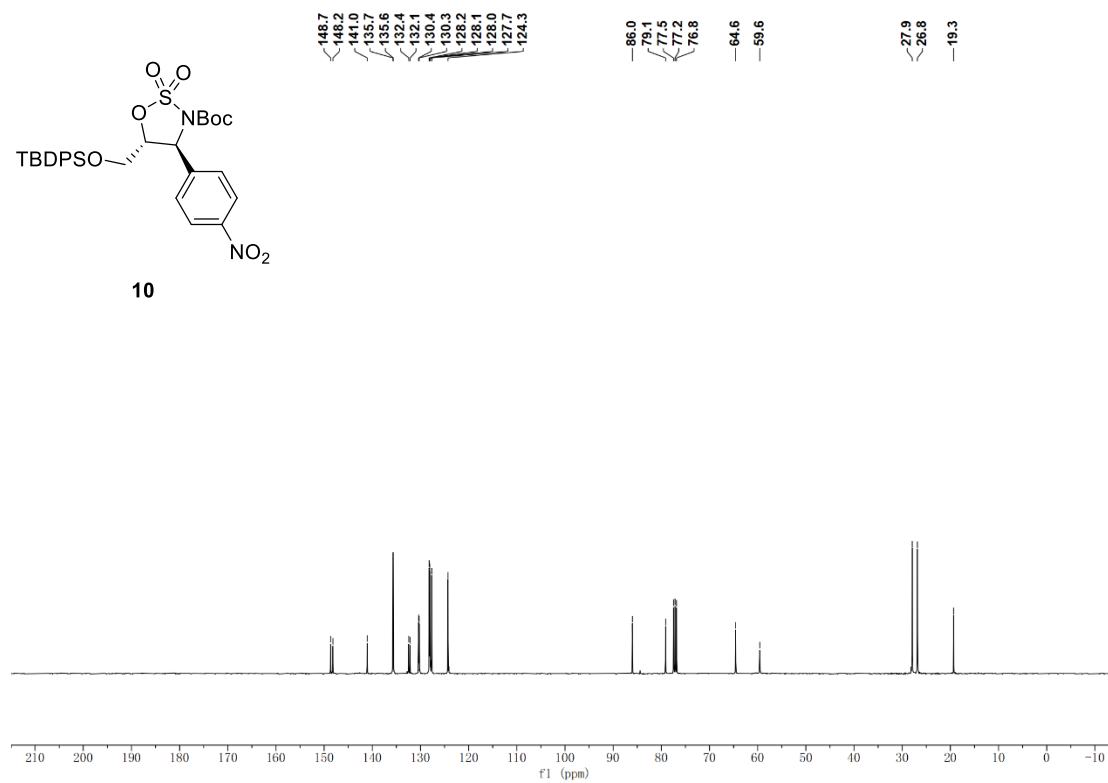

**Supplementary Figure 10.**  $^{13}\text{C}$  NMR Spectrum of **10** (100 MHz,  $\text{CDCl}_3$ )

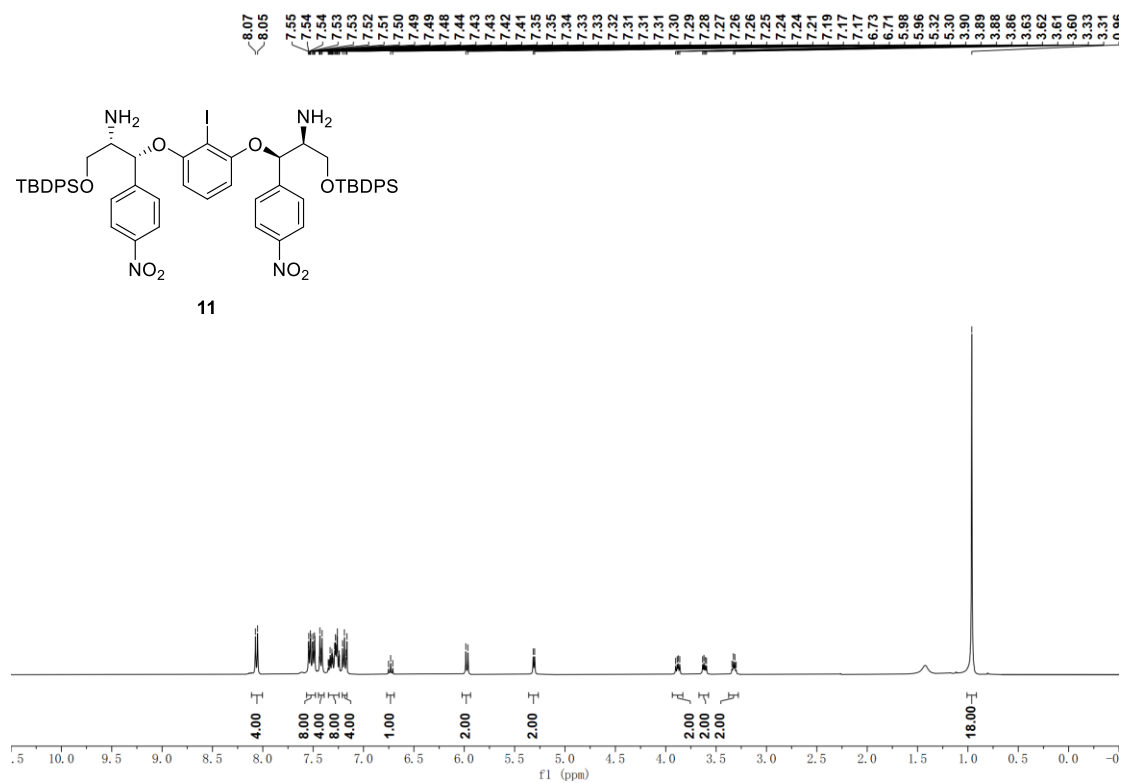

**Supplementary Figure 11.** <sup>1</sup>H NMR Spectrum of **11** (400 MHz, CDCl<sub>3</sub>)

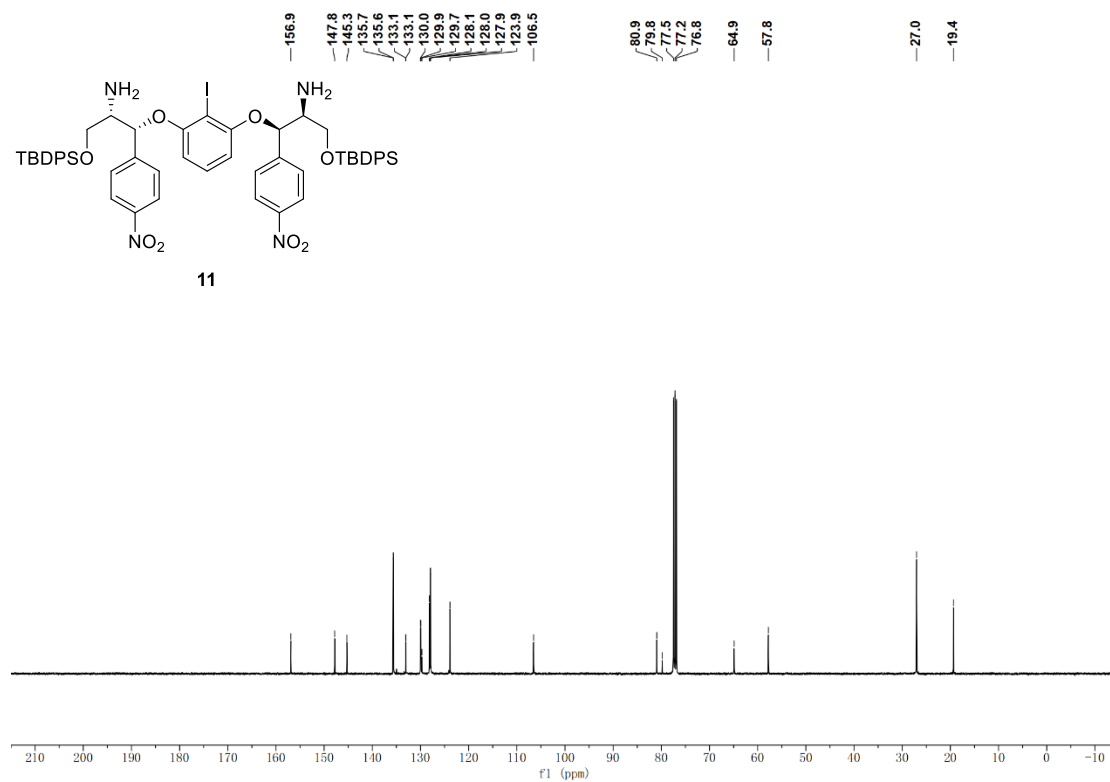

**Supplementary Figure 12.** <sup>13</sup>C NMR Spectrum of **11** (100 MHz, CDCl<sub>3</sub>)

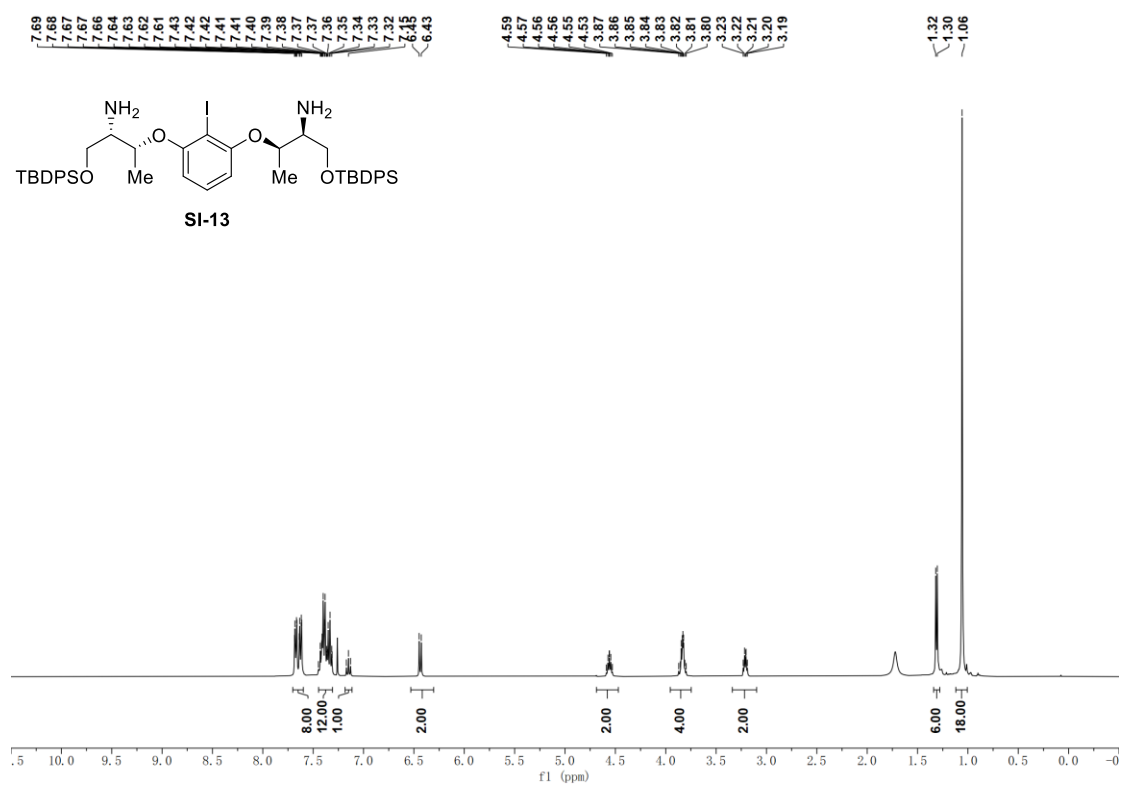

**Supplementary Figure 13.** <sup>1</sup>H NMR Spectrum of **SI-13** (400 MHz, CDCl<sub>3</sub>)

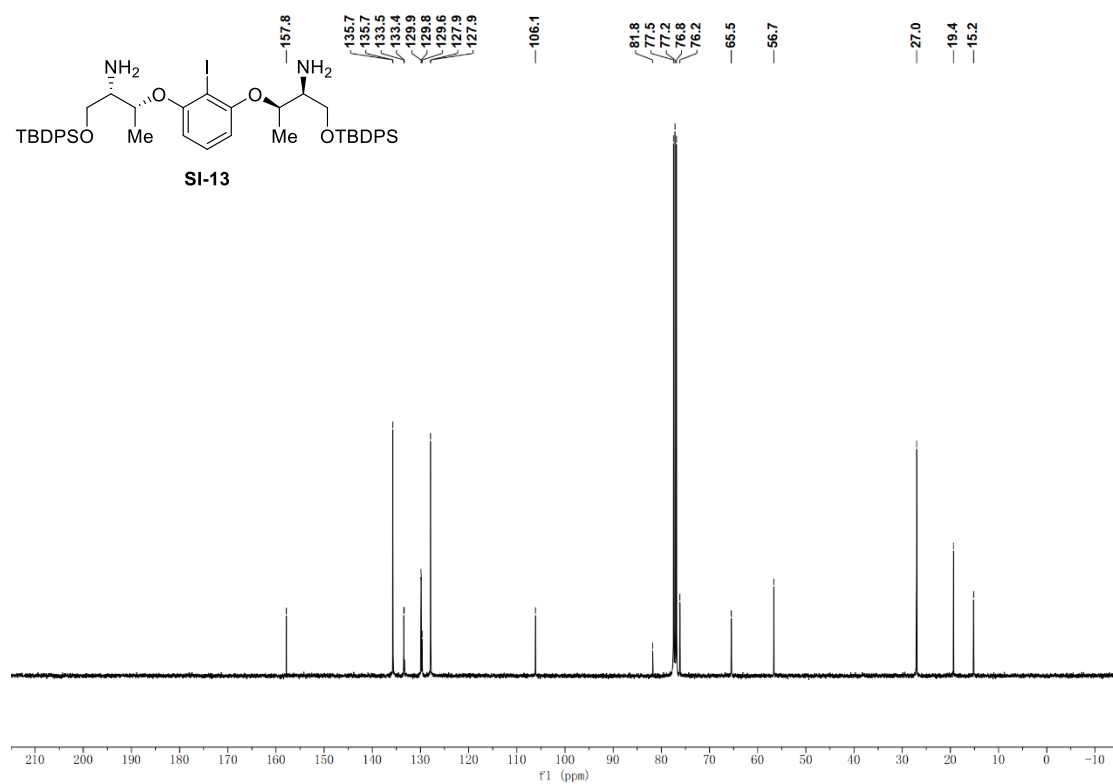

**Supplementary Figure 14.** <sup>13</sup>C NMR Spectrum of **SI-13** (100 MHz, CDCl<sub>3</sub>)

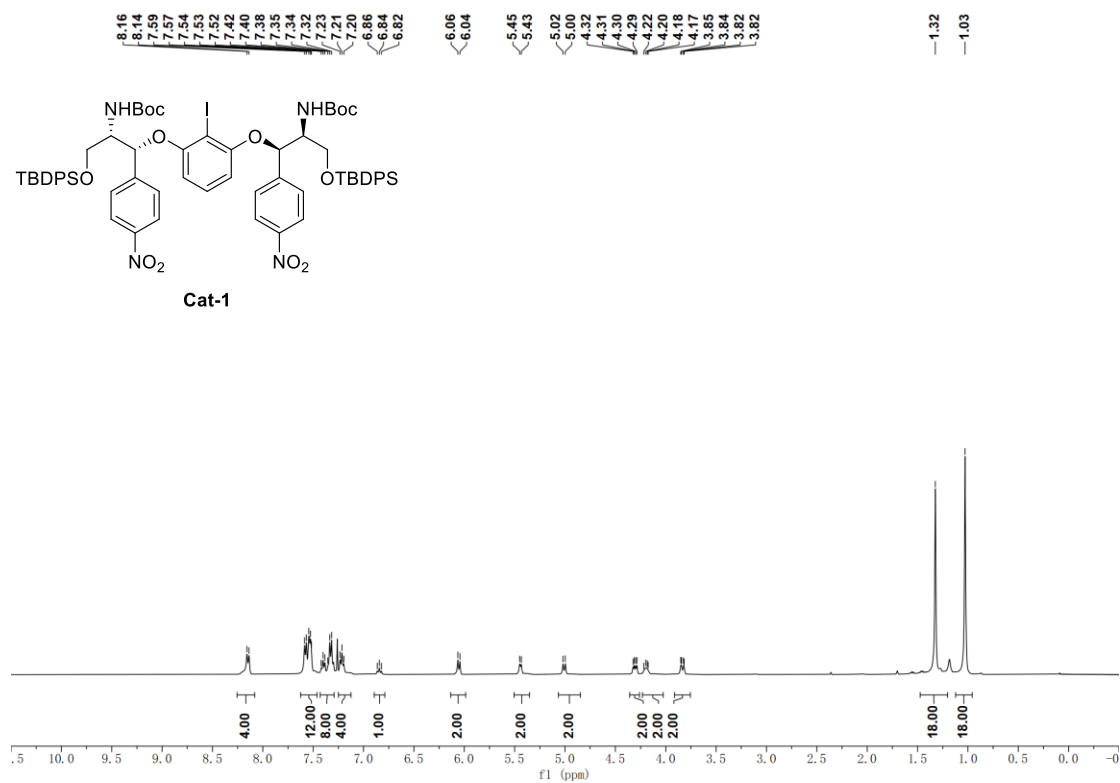

**Supplementary Figure 15.**  $^1\text{H}$  NMR Spectrum of **Cat-1** (400 MHz,  $\text{CDCl}_3$ )

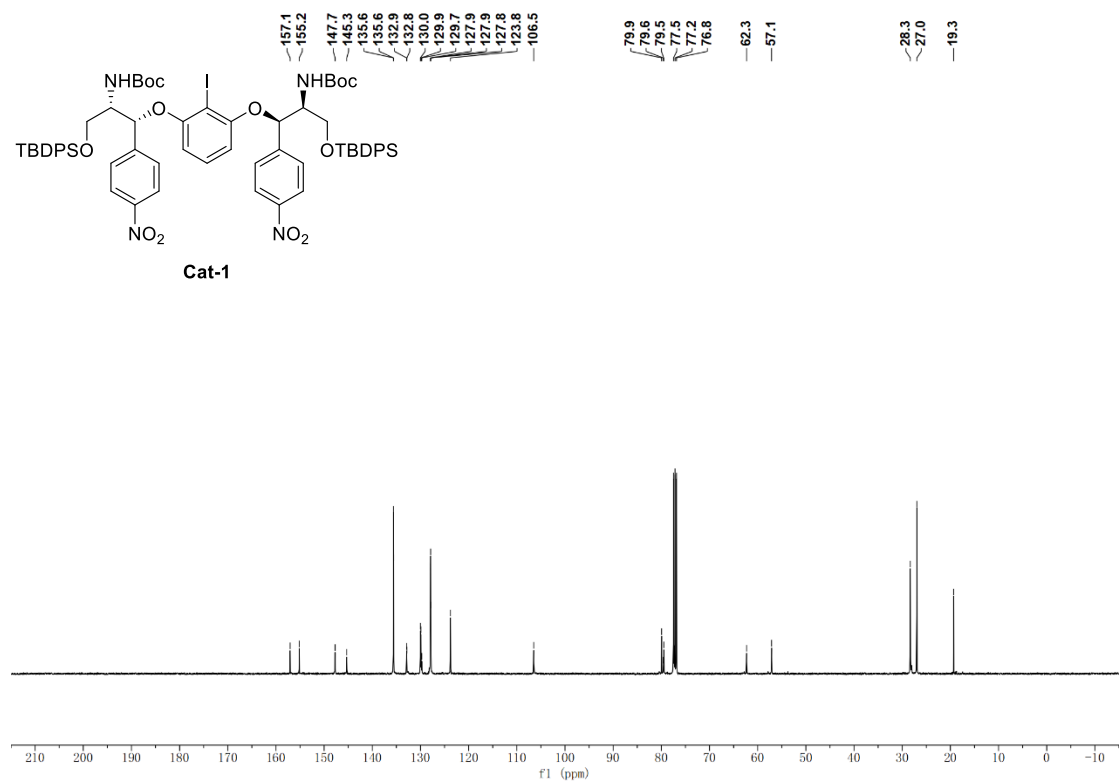

**Supplementary Figure 16.**  $^{13}\text{C}$  NMR Spectrum of **Cat-1** (100 MHz,  $\text{CDCl}_3$ )

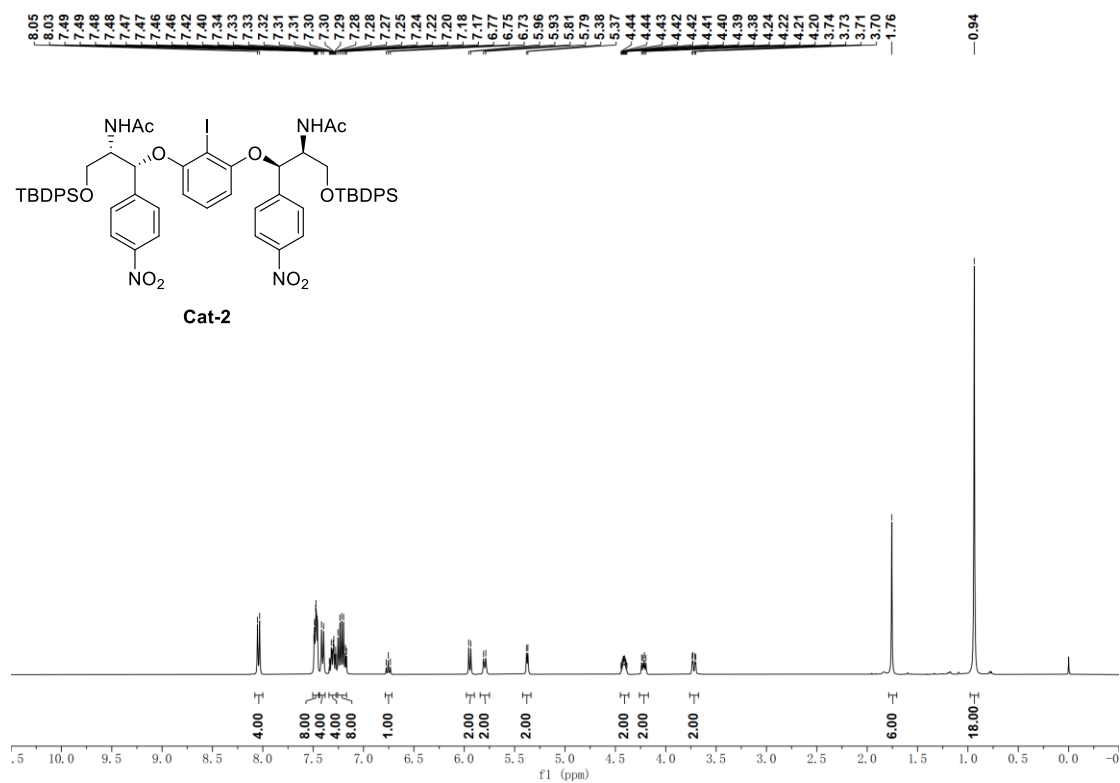

Supplementary Figure 17.  $^1\text{H}$  NMR Spectrum of **Cat-2** (400 MHz,  $\text{CDCl}_3$ )

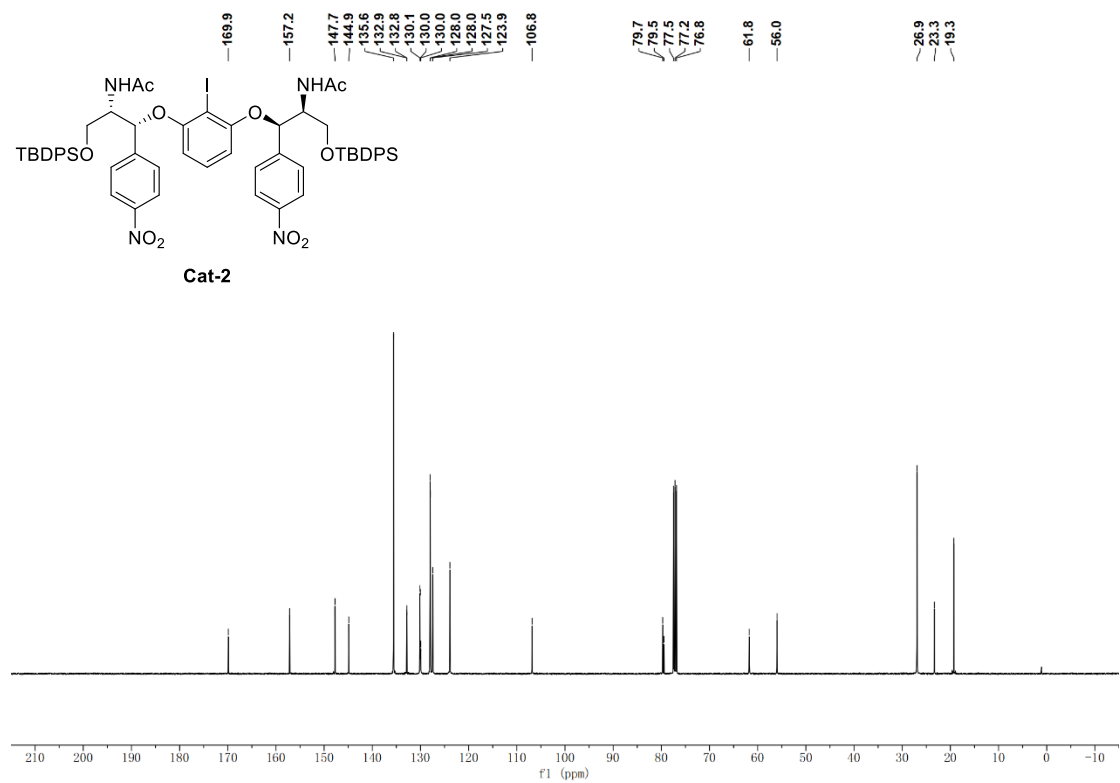

Supplementary Figure 18.  $^{13}\text{C}$  NMR Spectrum of **Cat-2** (100 MHz,  $\text{CDCl}_3$ )

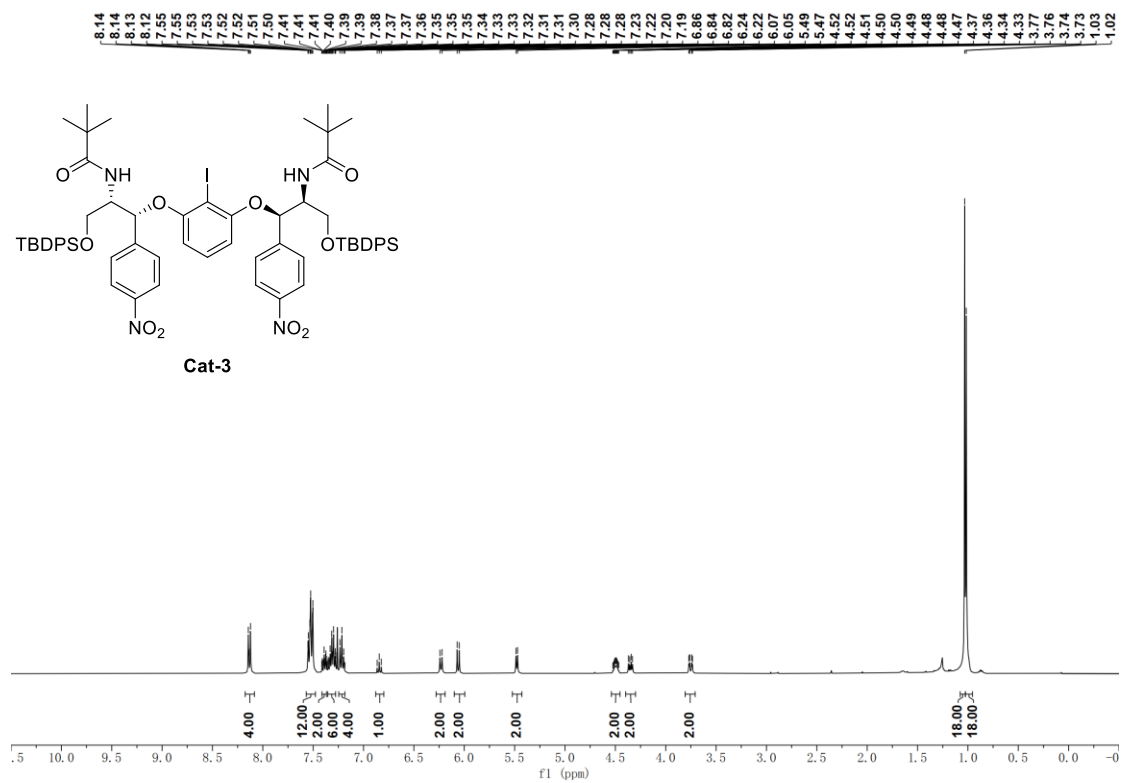

Supplementary Figure 19.  $^1\text{H}$  NMR Spectrum of **Cat-3** (400 MHz,  $\text{CDCl}_3$ )

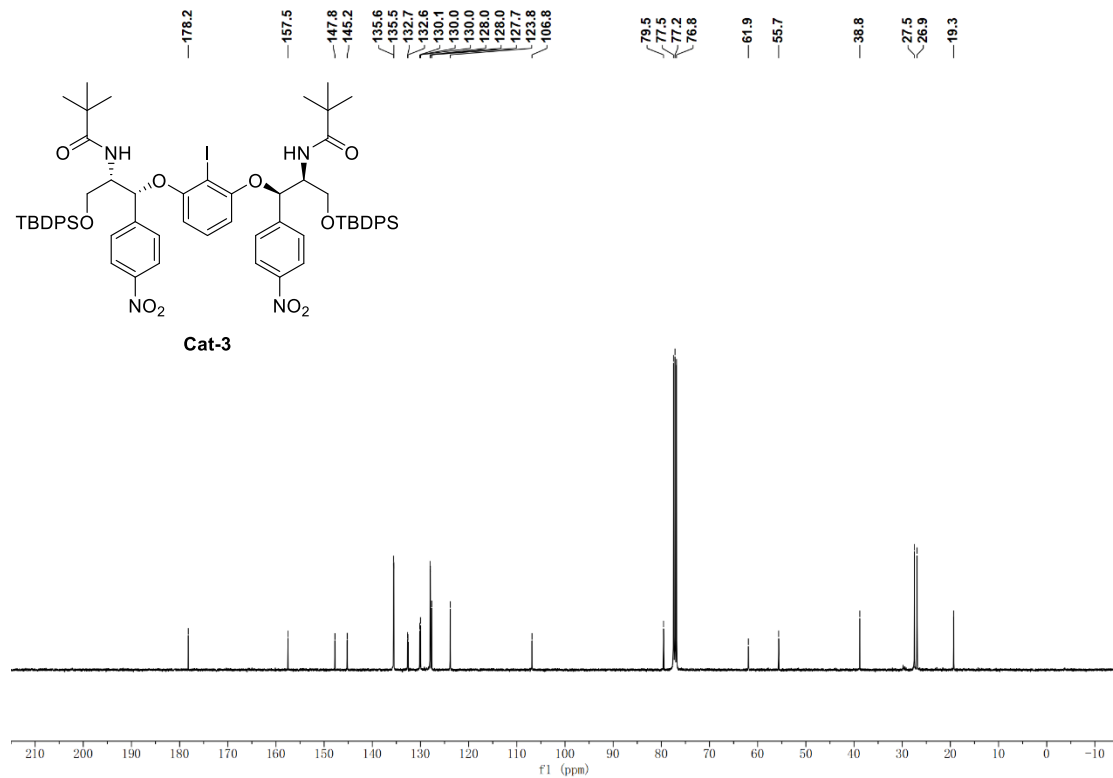

Supplementary Figure 20.  $^{13}\text{C}$  NMR Spectrum of **Cat-3** (100 MHz,  $\text{CDCl}_3$ )

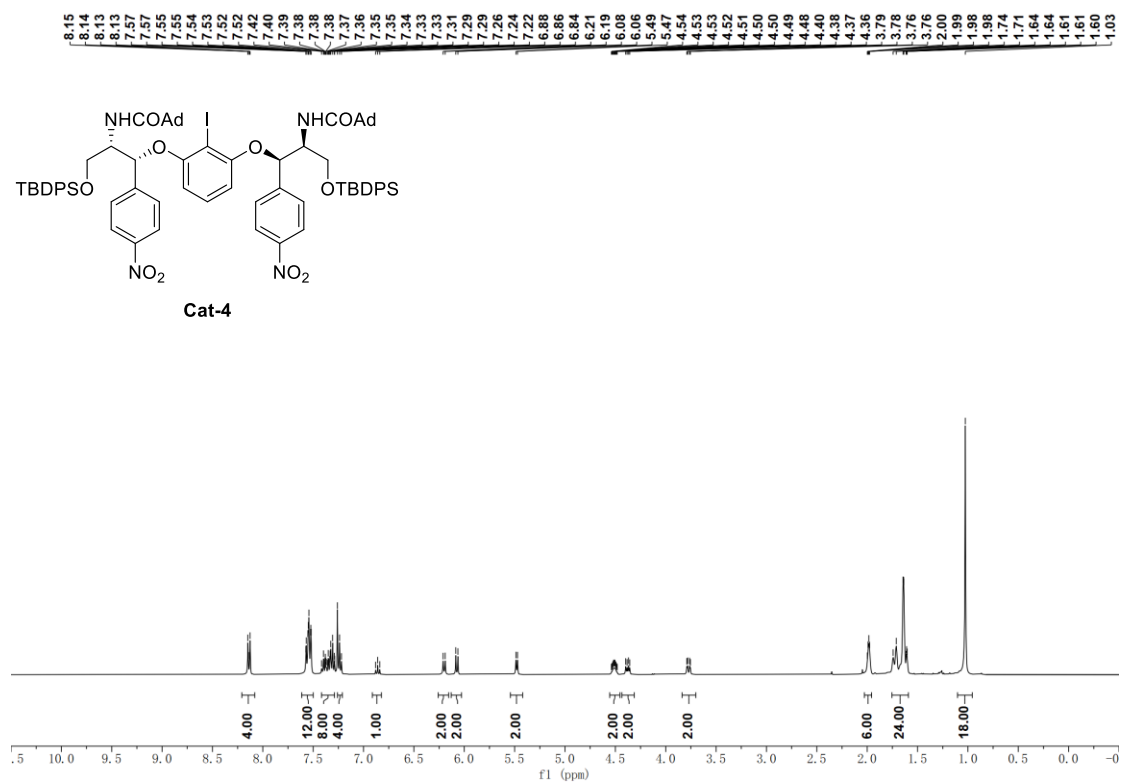

**Supplementary Figure 21.** <sup>1</sup>H NMR Spectrum of **Cat-4** (400 MHz, CDCl<sub>3</sub>)

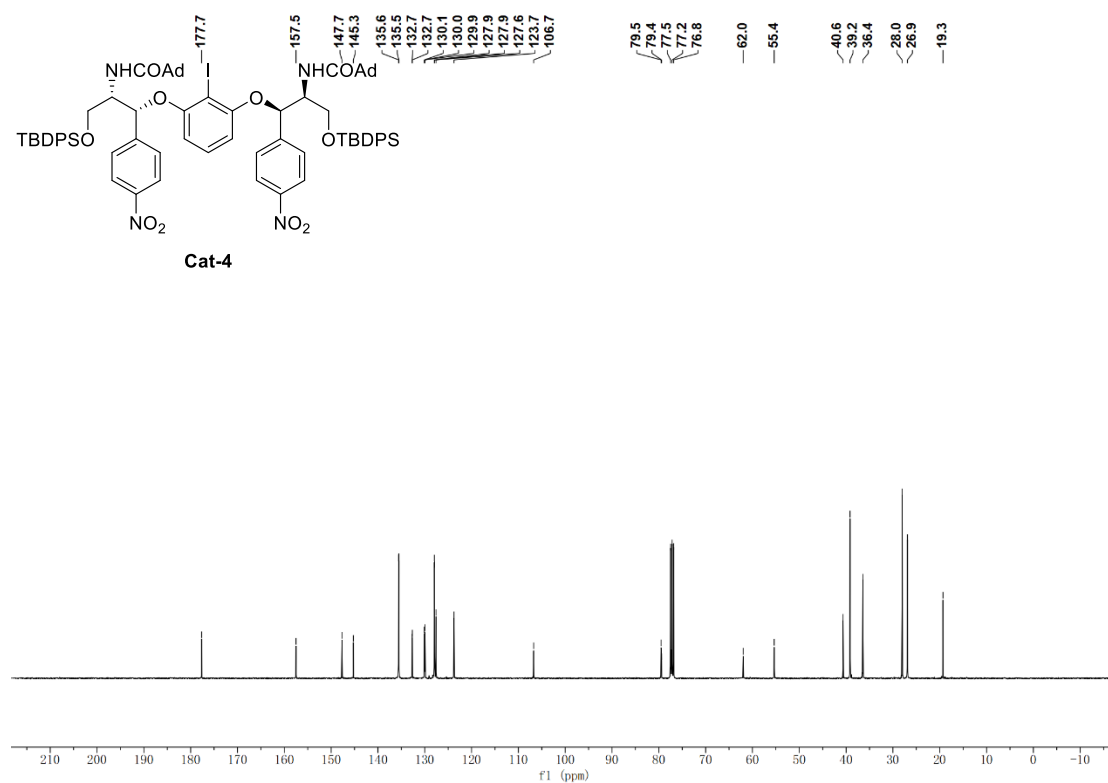

**Supplementary Figure 22.** <sup>13</sup>C NMR Spectrum of **Cat-4** (100 MHz, CDCl<sub>3</sub>)



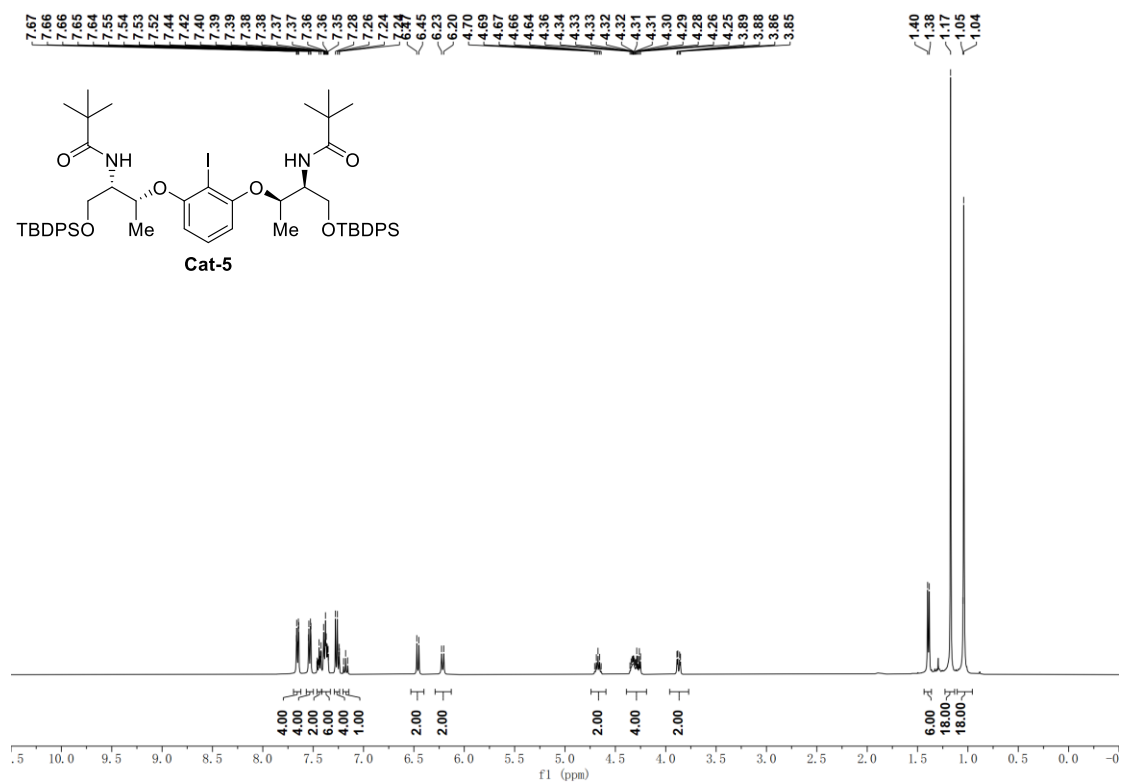

Supplementary Figure 23.  $^1\text{H}$  NMR Spectrum of **Cat-5** (400 MHz,  $\text{CDCl}_3$ )

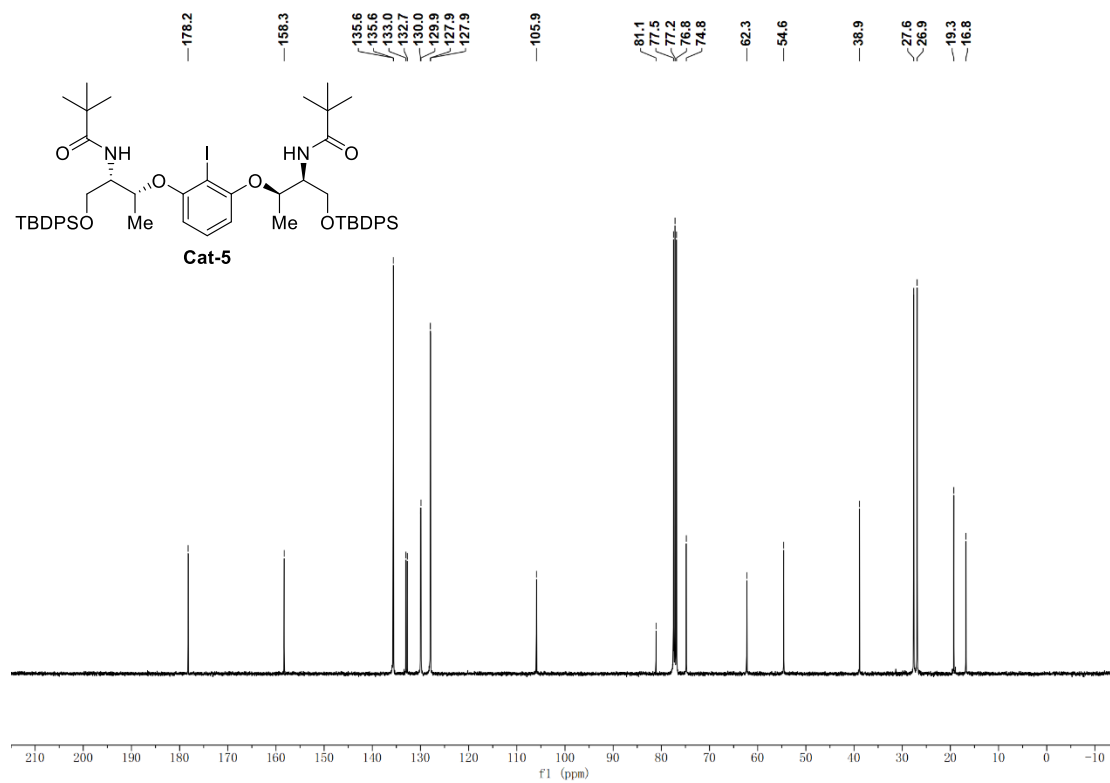

Supplementary Figure 24.  $^{13}\text{C}$  NMR Spectrum of **Cat-5** (100 MHz,  $\text{CDCl}_3$ )

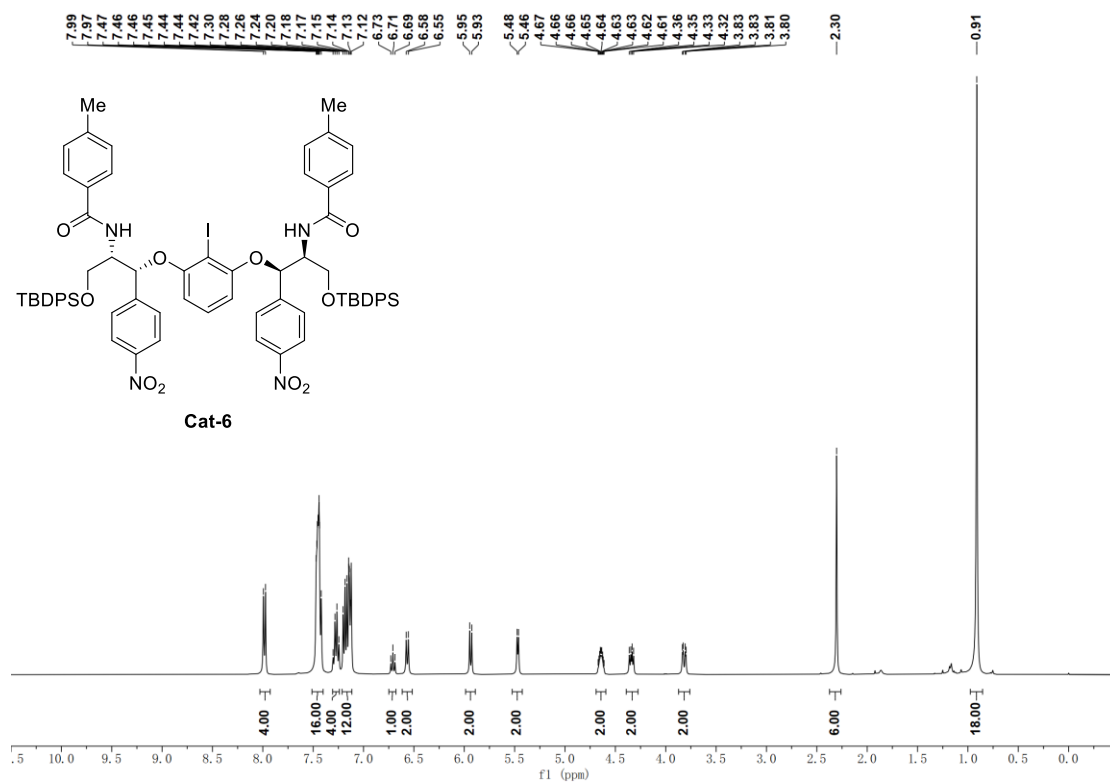

**Supplementary Figure 25.** <sup>1</sup>H NMR Spectrum of **Cat-6** (400 MHz, CDCl<sub>3</sub>)

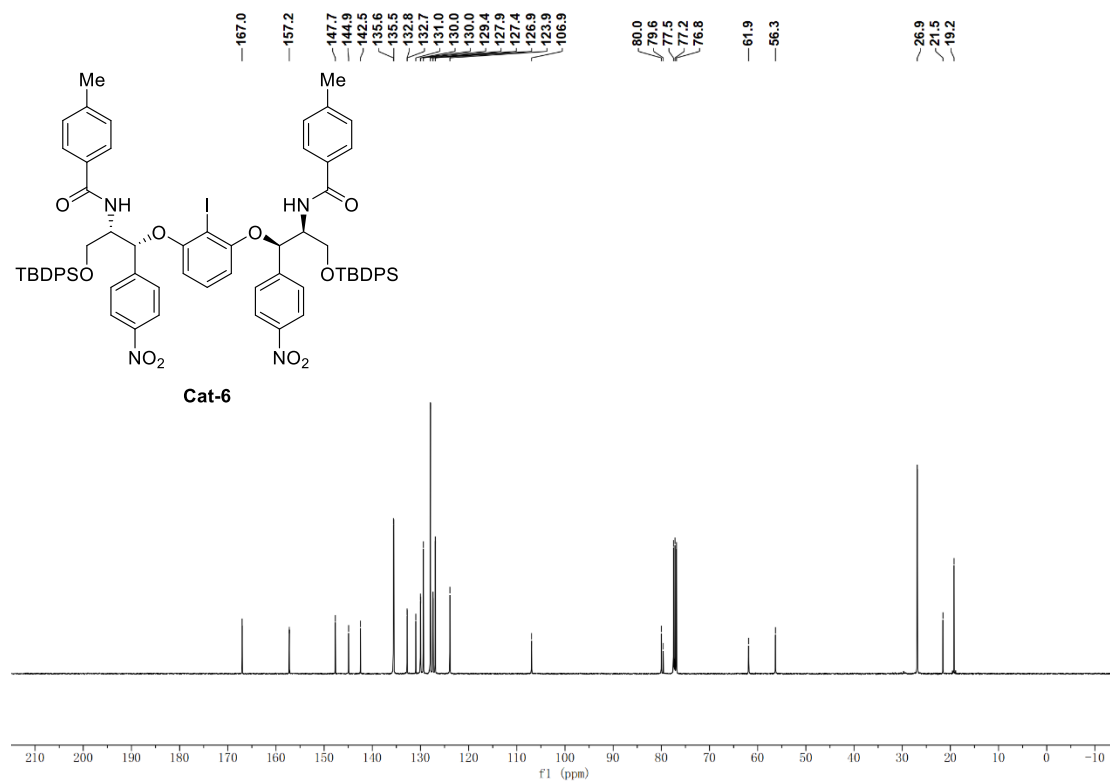

**Supplementary Figure 26.** <sup>13</sup>C NMR Spectrum of **Cat-6** (100 MHz, CDCl<sub>3</sub>)

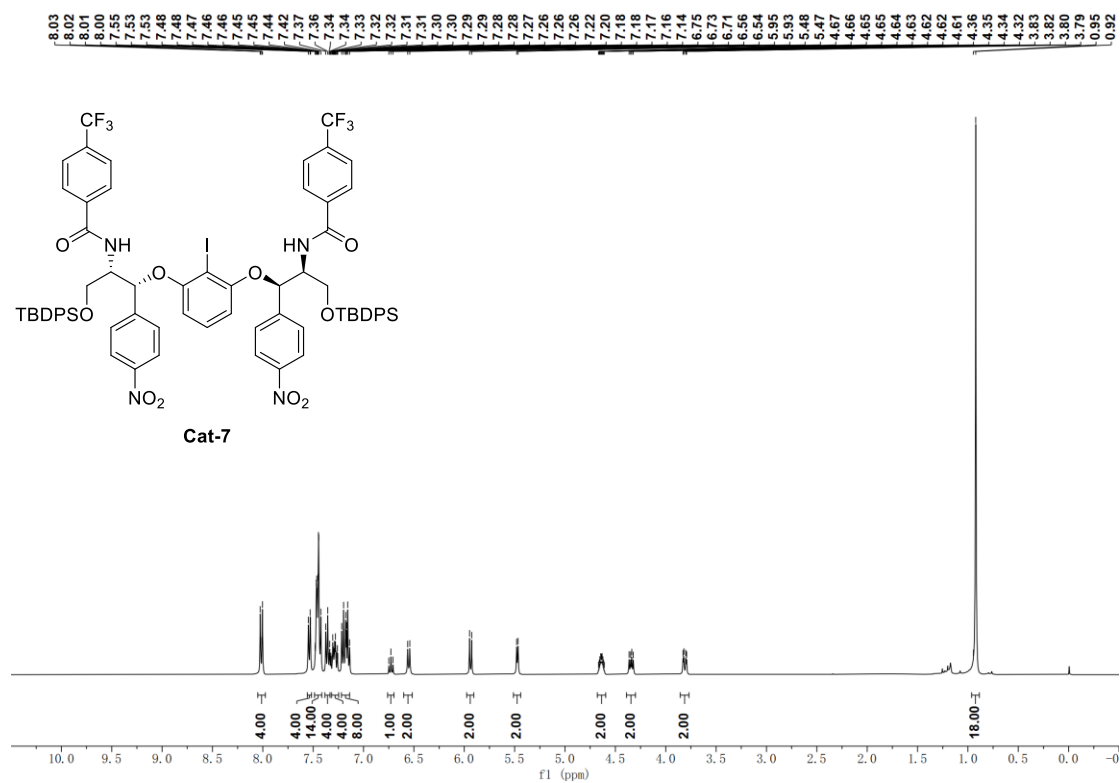

Supplementary Figure 27.  $^1\text{H}$  NMR Spectrum of **Cat-7** (400 MHz,  $\text{CDCl}_3$ )

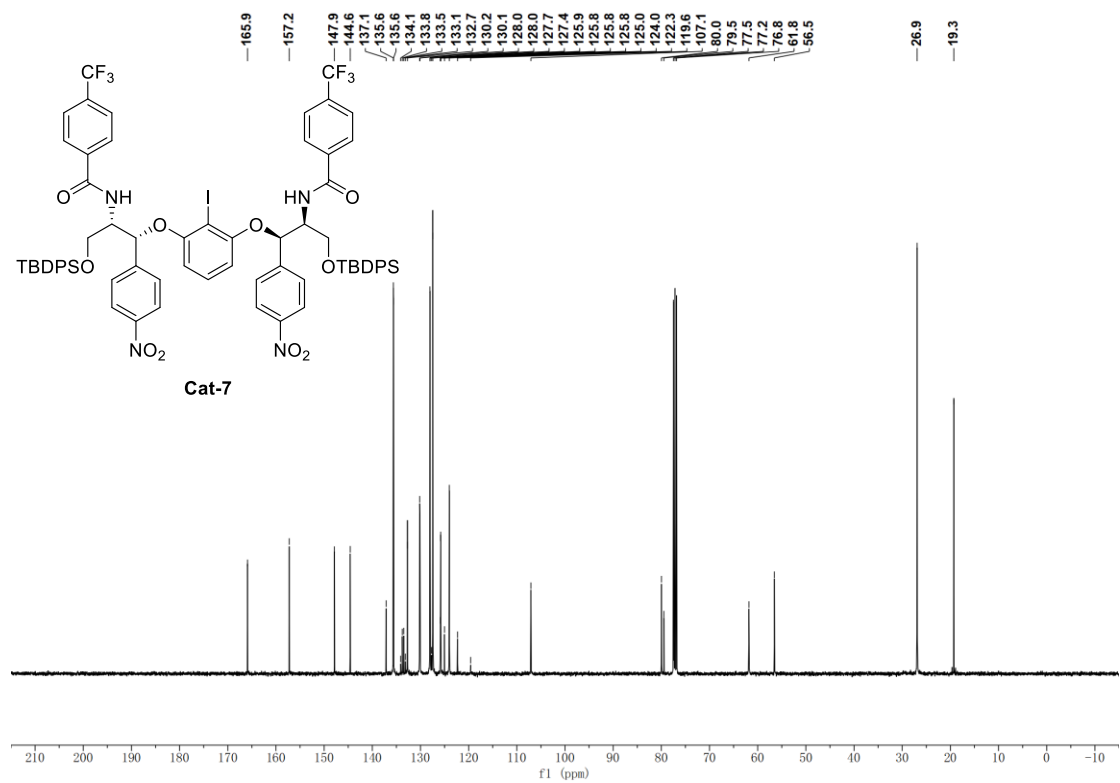

Supplementary Figure 28.  $^{13}\text{C}$  NMR Spectrum of **Cat-7** (100 MHz,  $\text{CDCl}_3$ )

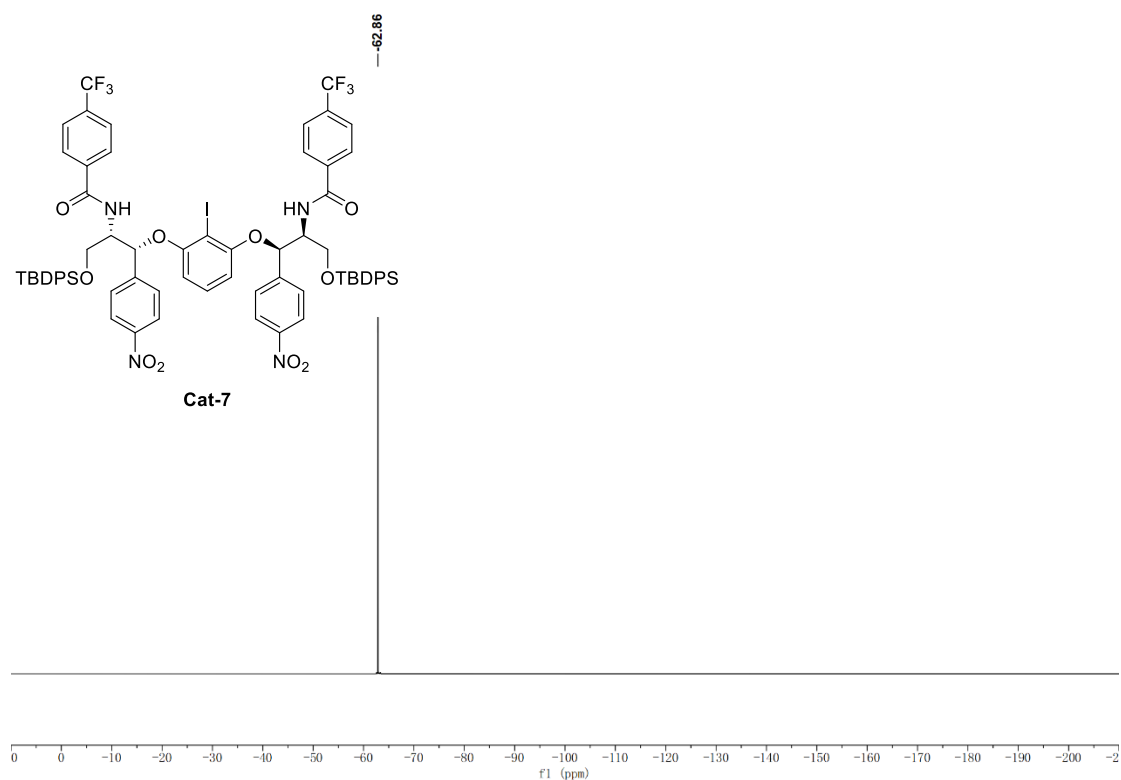

**Supplementary Figure 29.**  $^{19}\text{F}$  NMR Spectrum of **Cat-7** (376 MHz,  $\text{CDCl}_3$ )

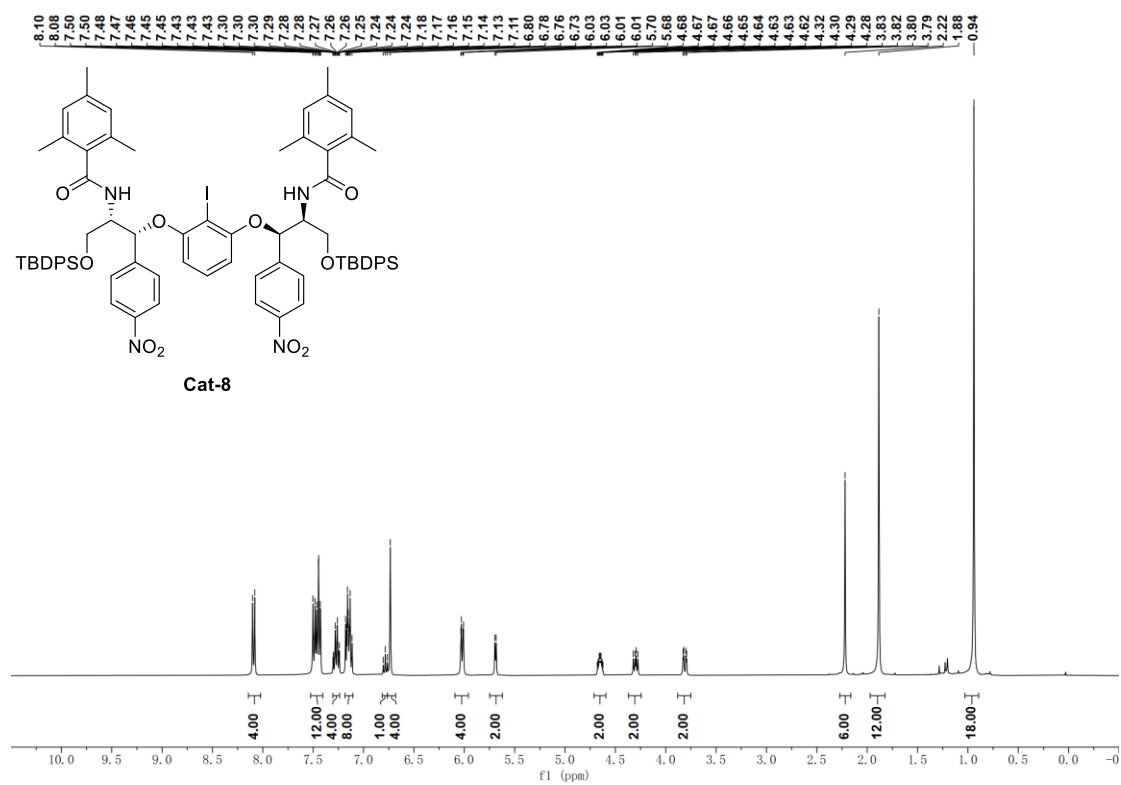

**Supplementary Figure 30.**  $^1\text{H}$  NMR Spectrum of **Cat-8** (400 MHz,  $\text{CDCl}_3$ )

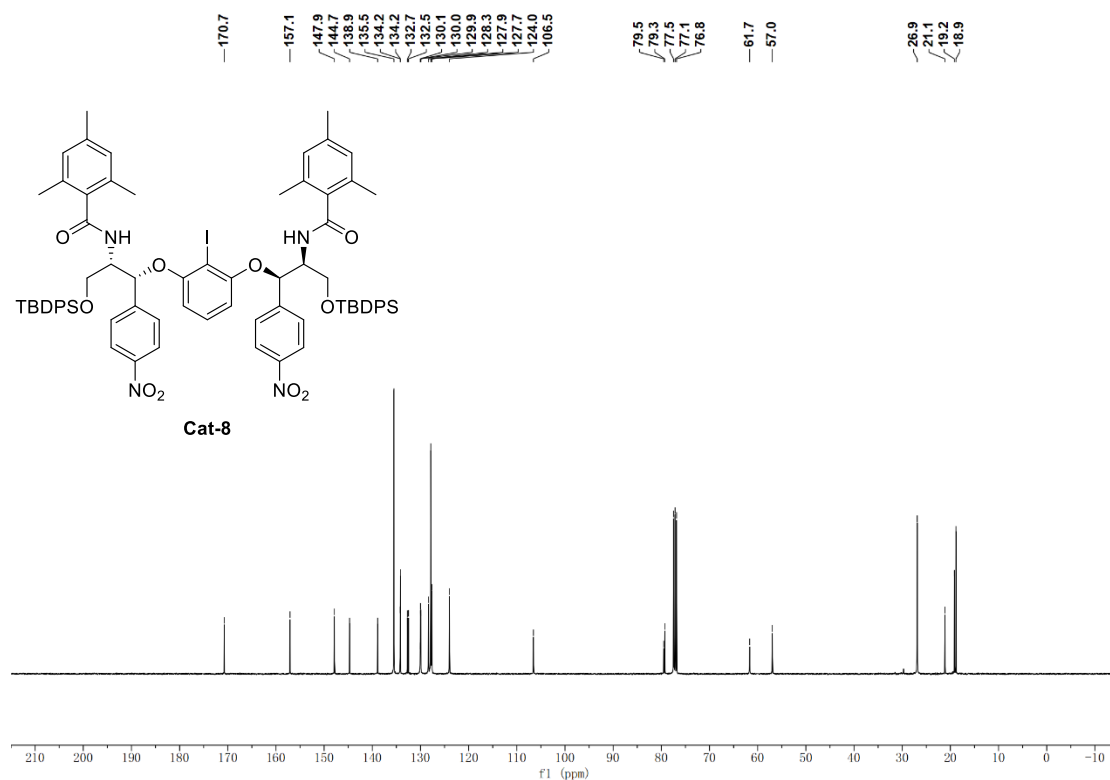

**Supplementary Figure 31.**  $^{13}\text{C}$  NMR Spectrum of **Cat-8** (100 MHz,  $\text{CDCl}_3$ )

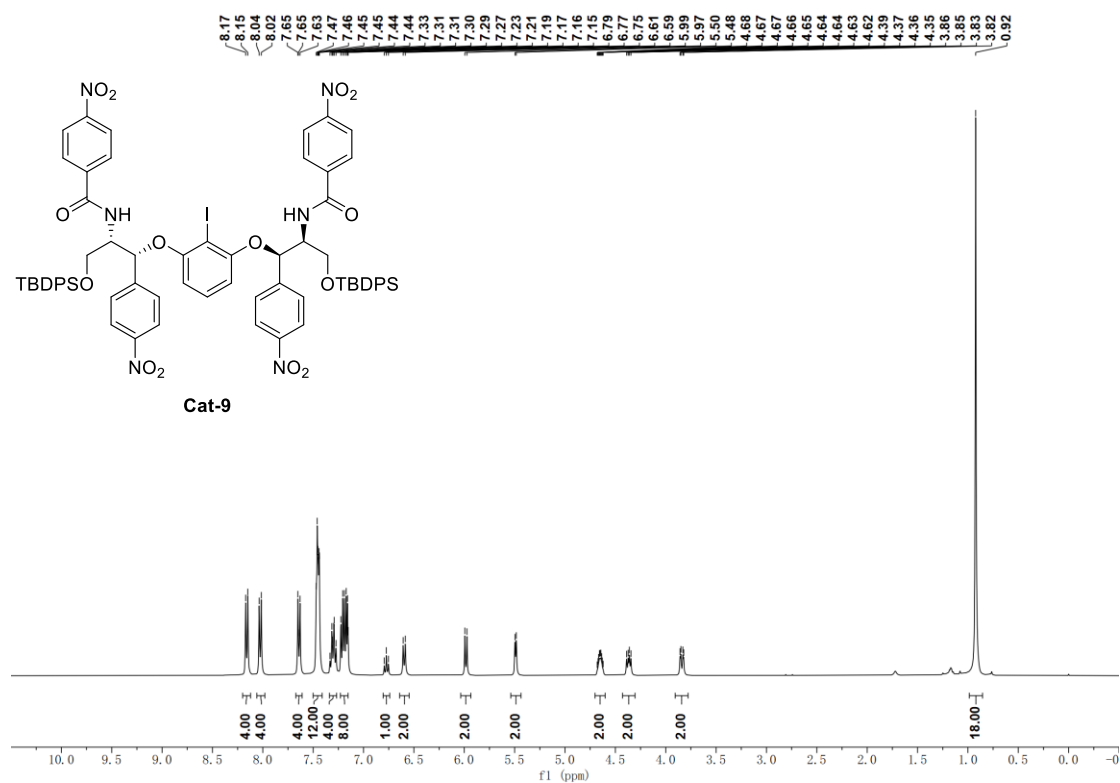

**Supplementary Figure 32.**  $^1\text{H}$  NMR Spectrum of **Cat-9** (400 MHz,  $\text{CDCl}_3$ )

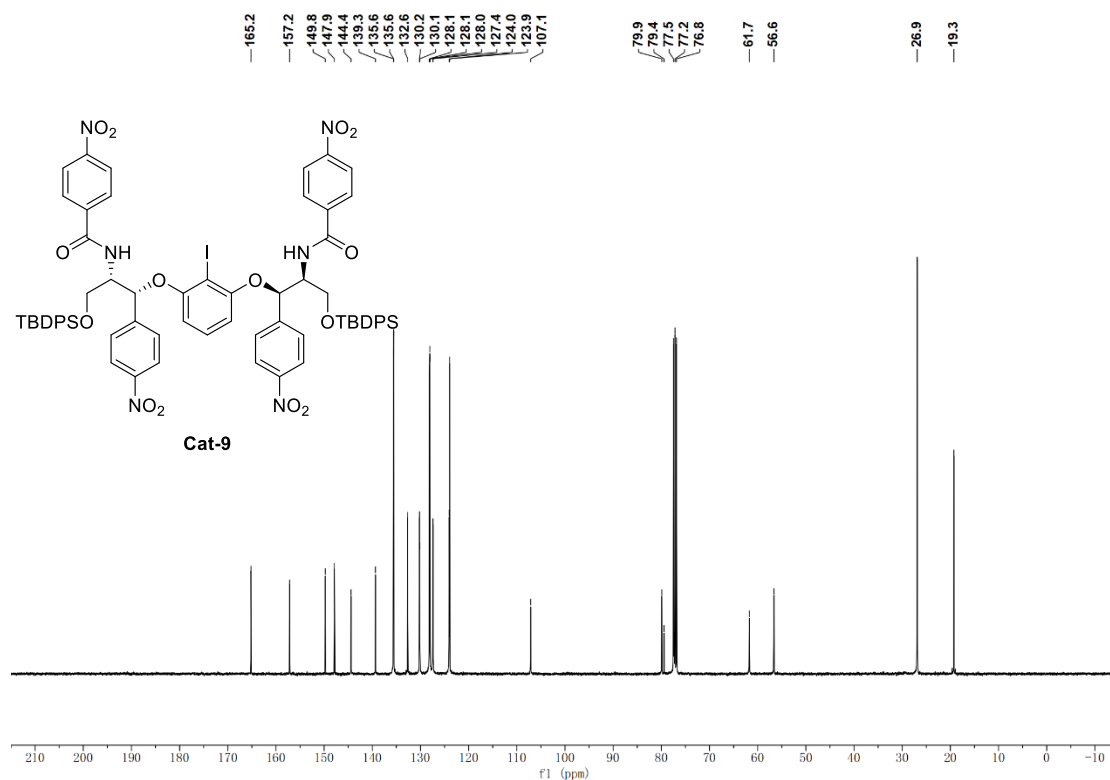

Supplementary Figure 33.  $^{13}\text{C}$  NMR Spectrum of **Cat-9** (100 MHz,  $\text{CDCl}_3$ )

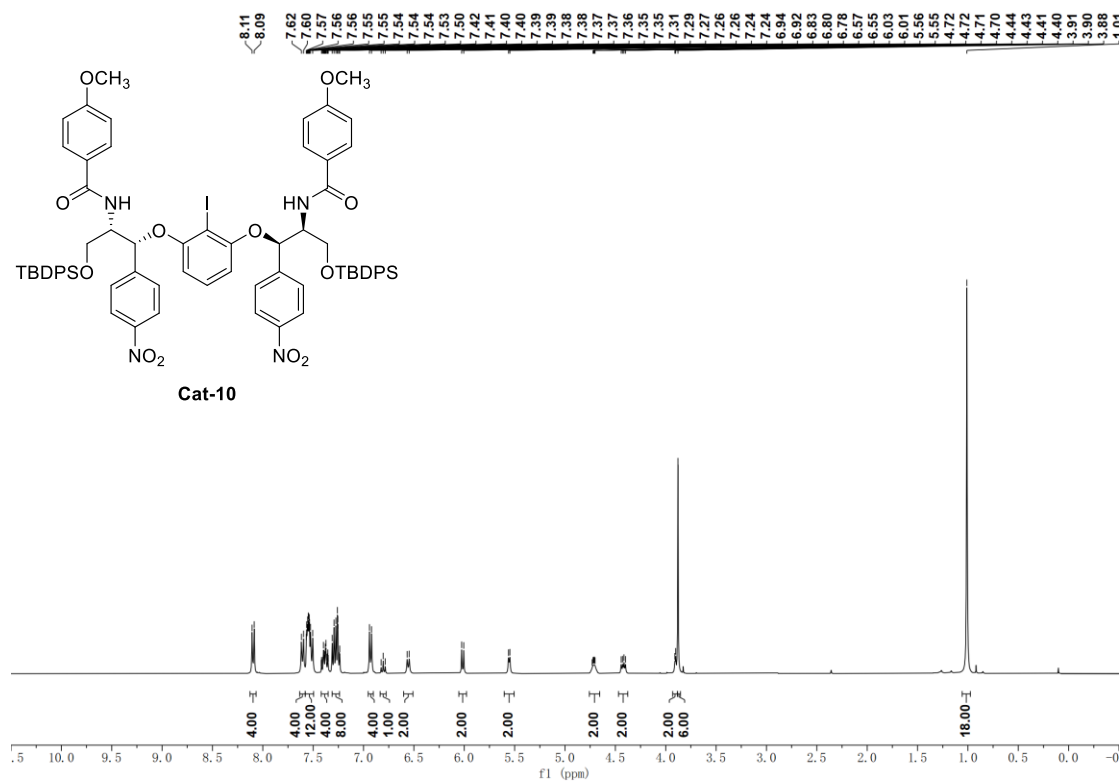

Supplementary Figure 34.  $^1\text{H}$  NMR Spectrum of **Cat-10** (400 MHz,  $\text{CDCl}_3$ )

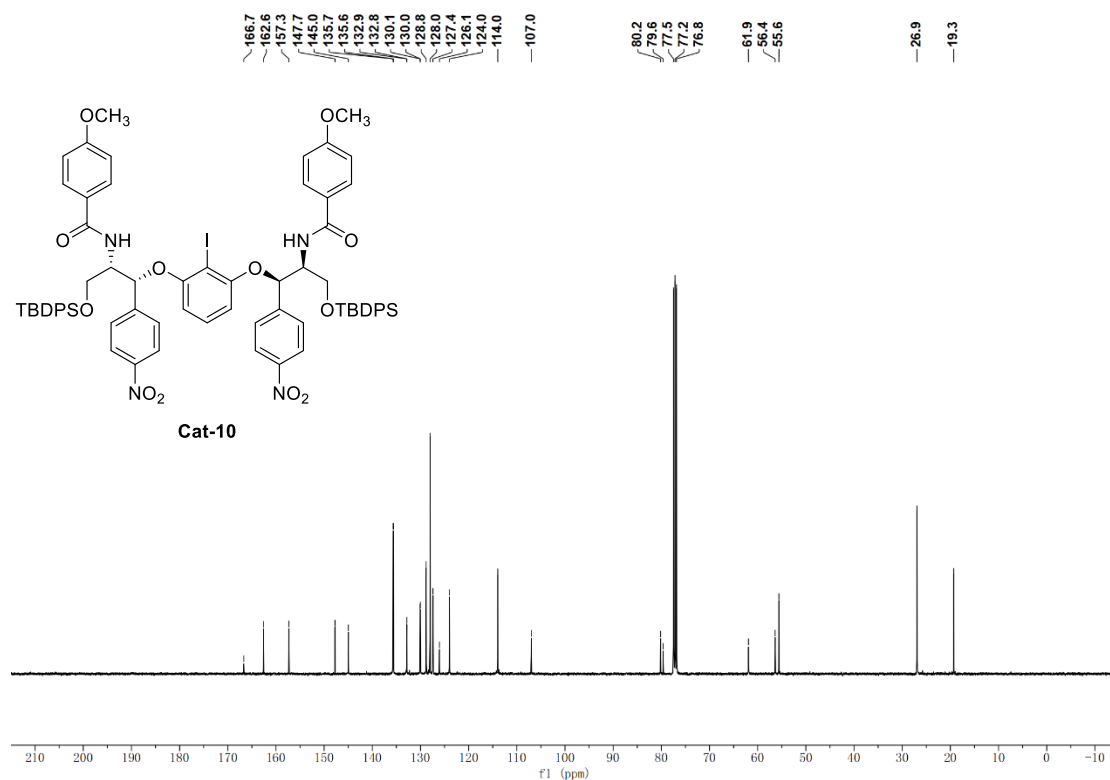

**Supplementary Figure 35.**  $^{13}\text{C}$  NMR Spectrum of **Cat-10** (100 MHz,  $\text{CDCl}_3$ )

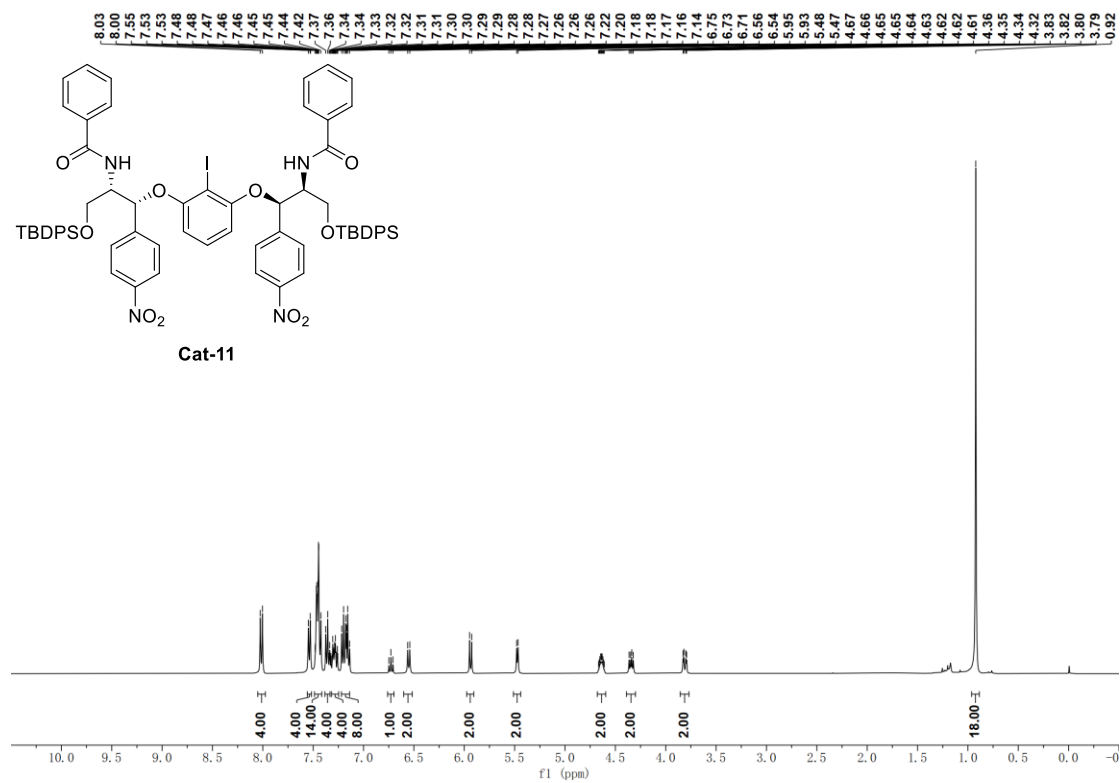

**Supplementary Figure 36.**  $^1\text{H}$  NMR Spectrum of **Cat-11** (400 MHz,  $\text{CDCl}_3$ )

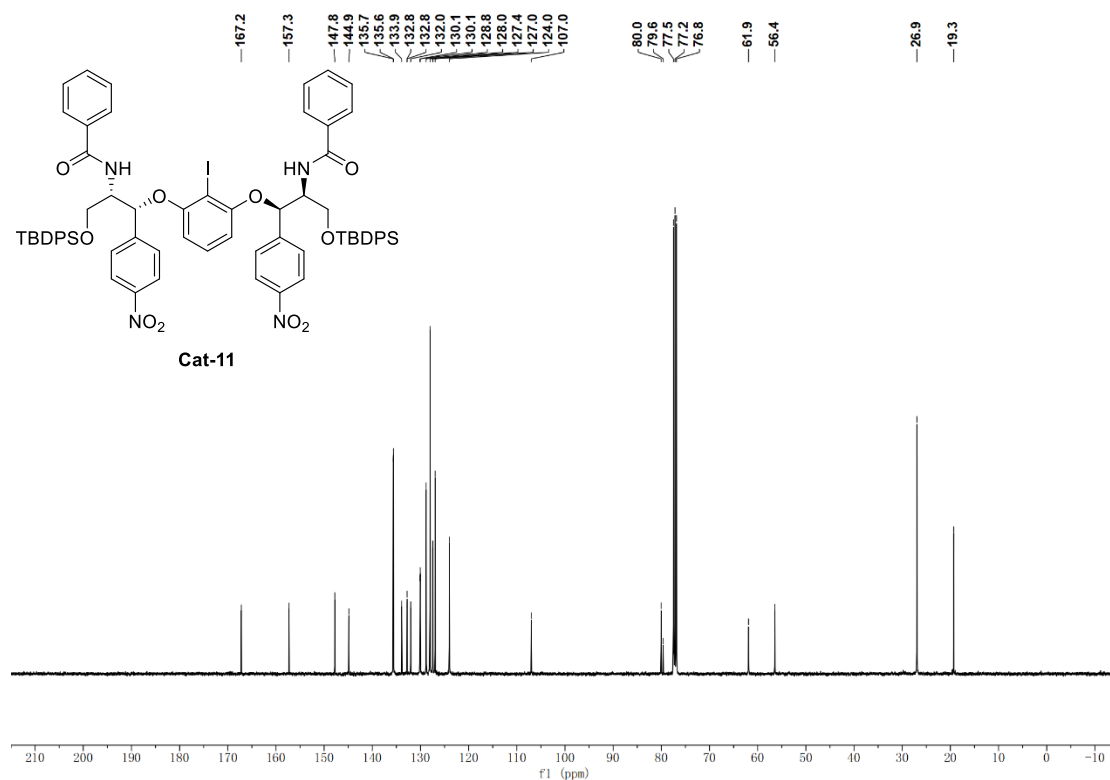

**Supplementary Figure 37.**  $^{13}\text{C}$  NMR Spectrum of **Cat-11** (100 MHz,  $\text{CDCl}_3$ )

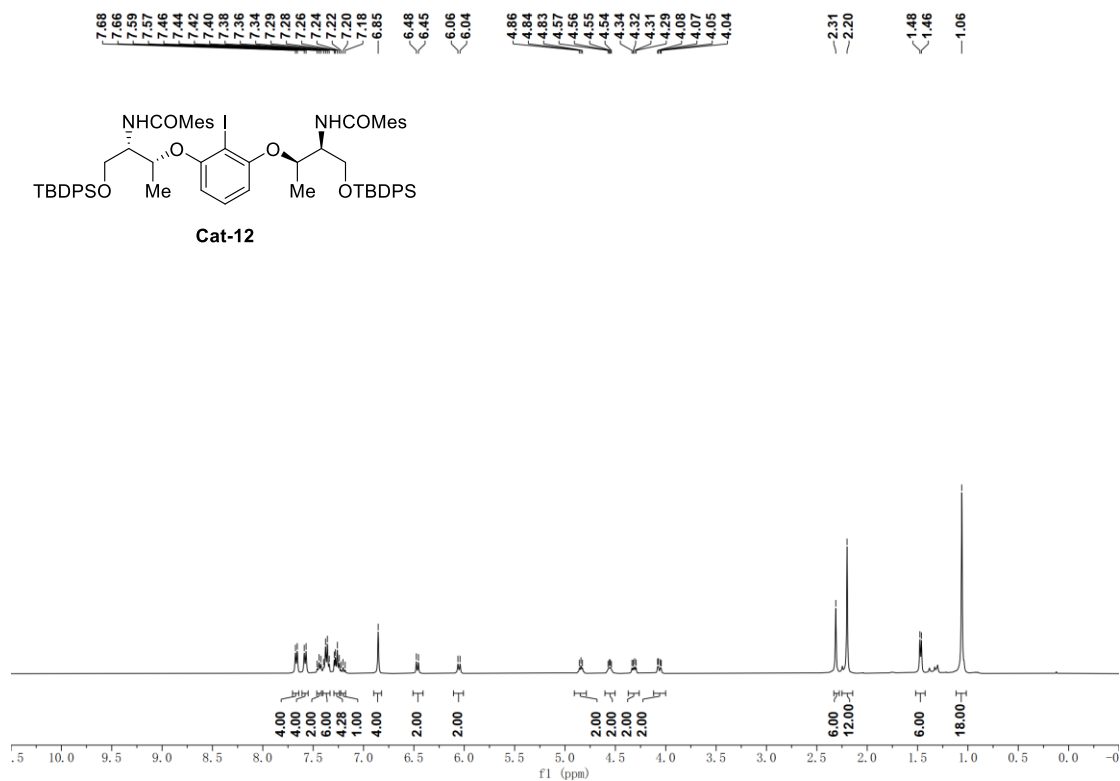

**Supplementary Figure 38.**  $^1\text{H}$  NMR Spectrum of **Cat-12** (400 MHz,  $\text{CDCl}_3$ )



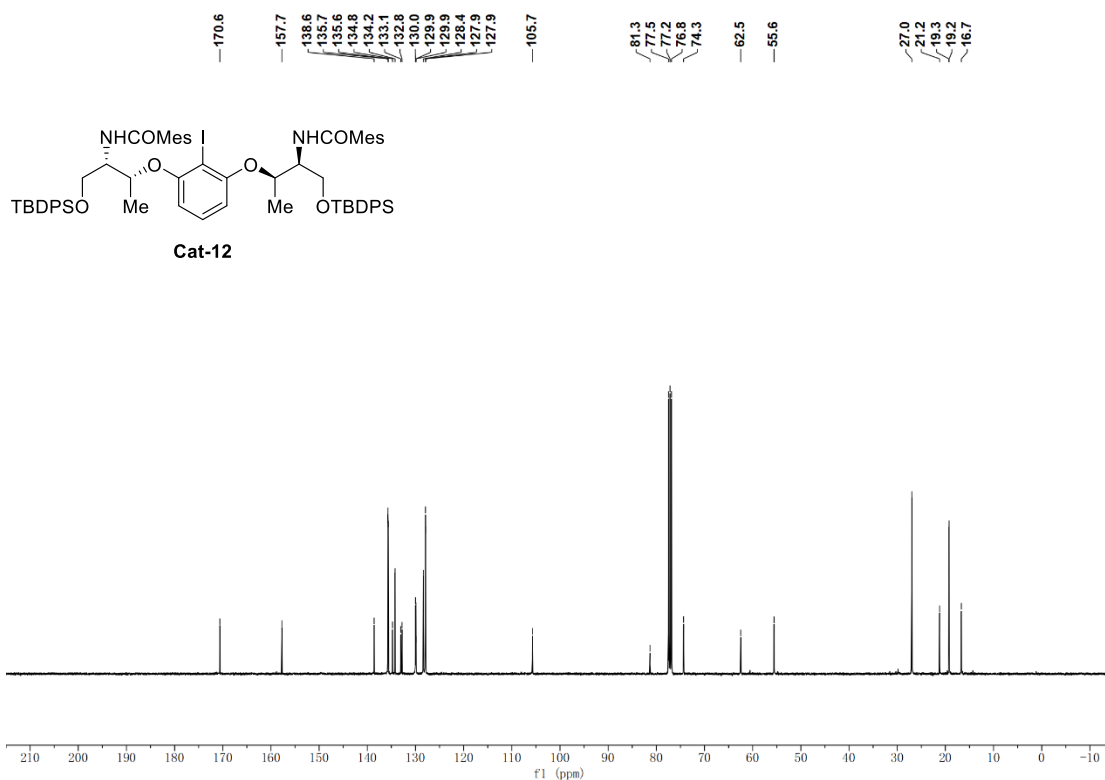

**Supplementary Figure 39.**  $^{13}\text{C}$  NMR Spectrum of **Cat-12** (100 MHz,  $\text{CDCl}_3$ )

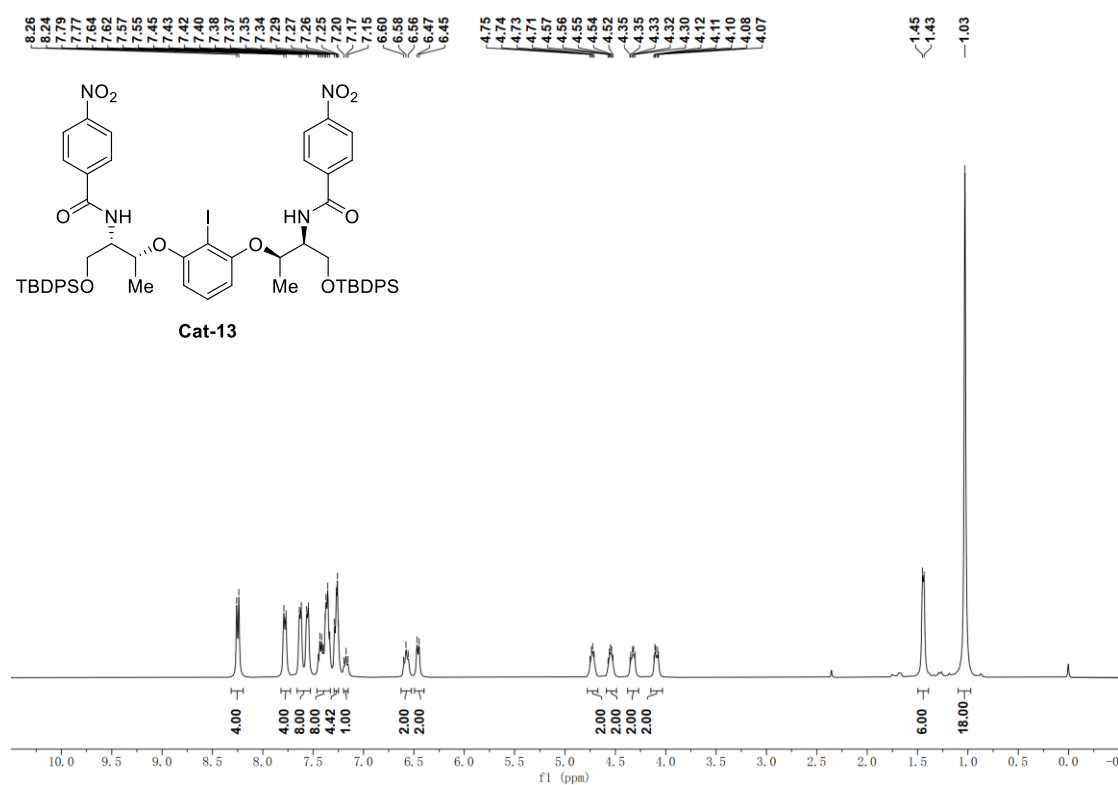

**Supplementary Figure 40.**  $^1\text{H}$  NMR Spectrum of **Cat-13** (400 MHz,  $\text{CDCl}_3$ )

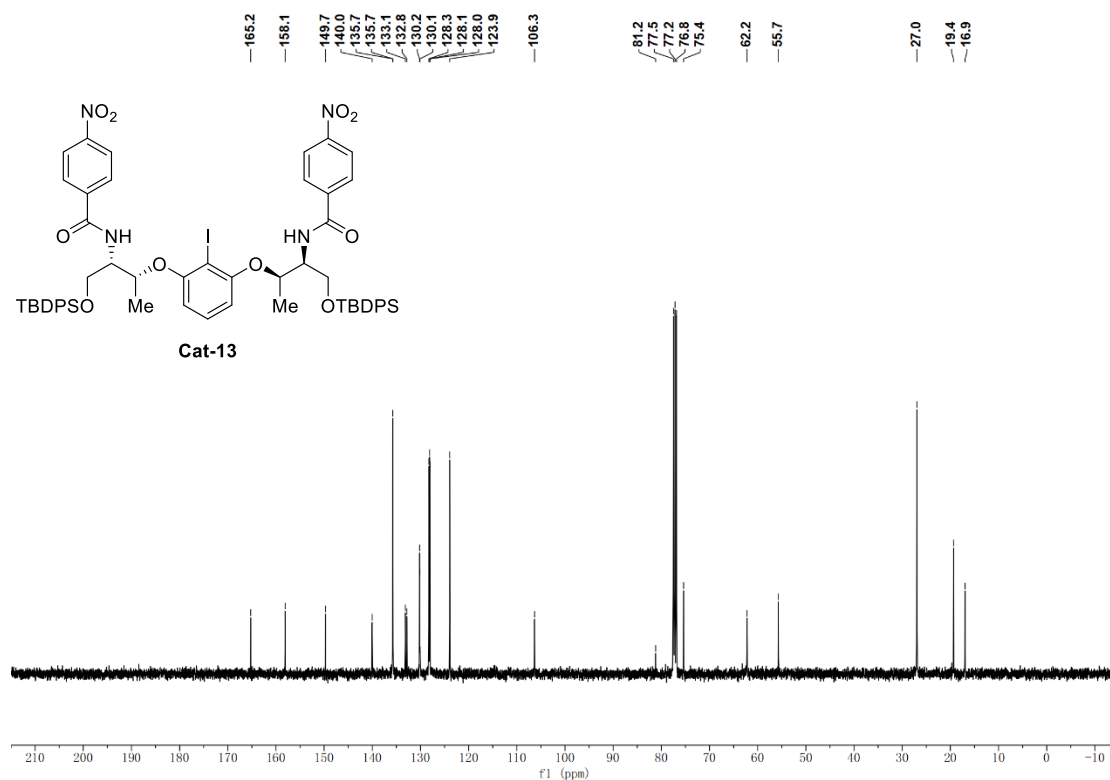

**Supplementary Figure 41.**  $^{13}\text{C}$  NMR Spectrum of **Cat-13** (100 MHz,  $\text{CDCl}_3$ )

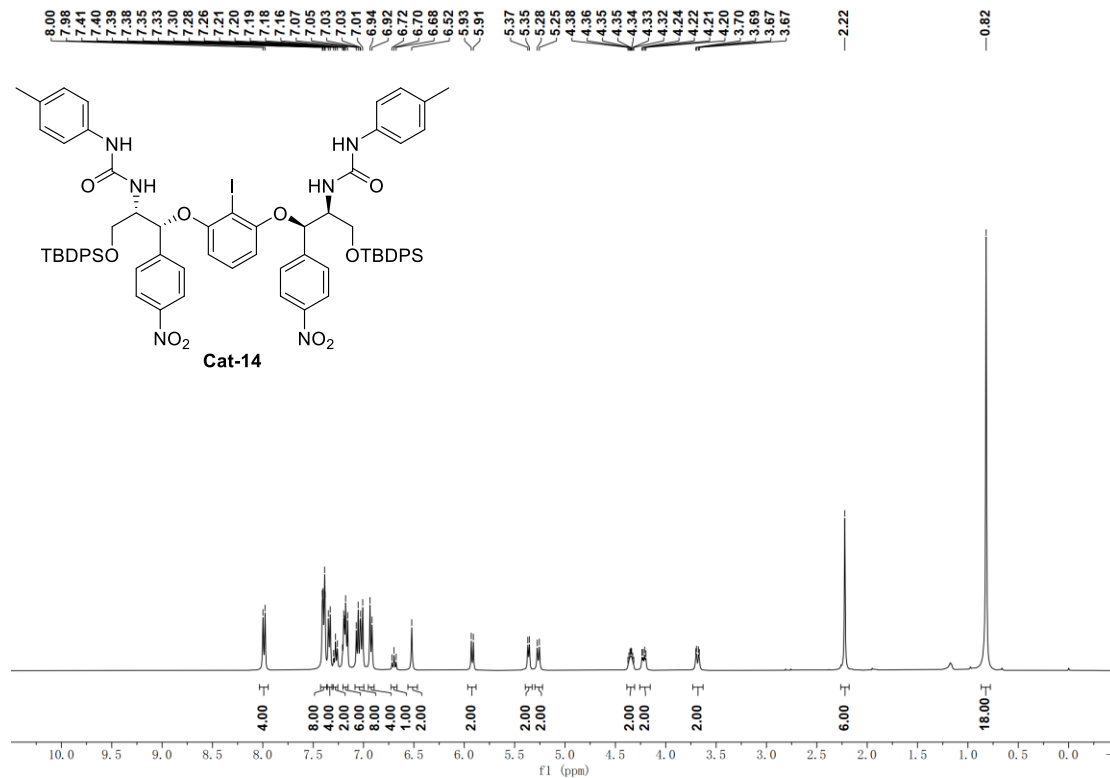

**Supplementary Figure 42.**  $^1\text{H}$  NMR Spectrum of **Cat-14** (400 MHz,  $\text{CDCl}_3$ )

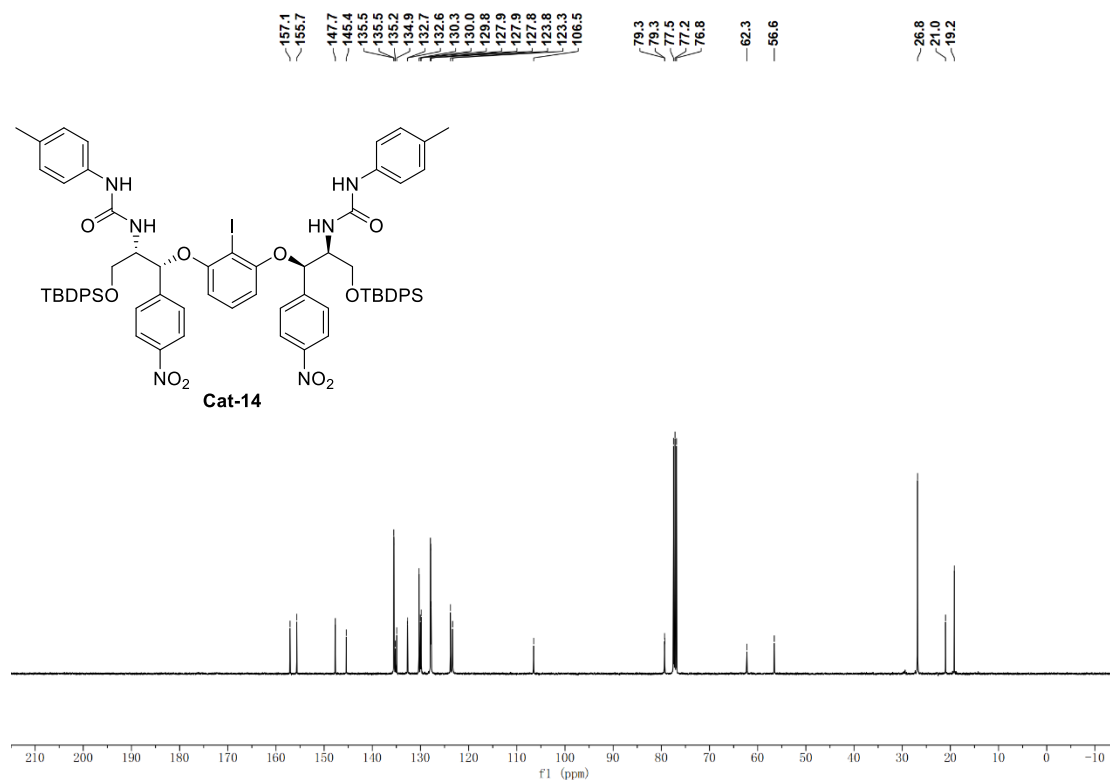

**Supplementary Figure 43.**  $^{13}\text{C}$  NMR Spectrum of **Cat-14** (100 MHz,  $\text{CDCl}_3$ )

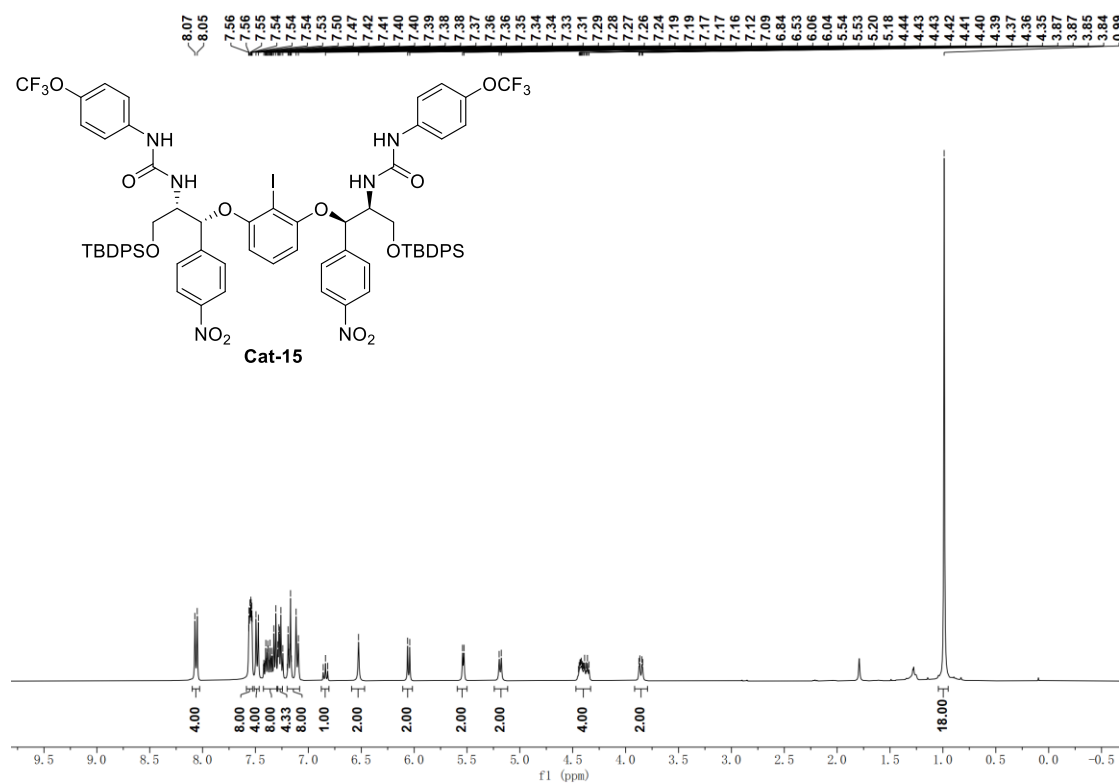

**Supplementary Figure 44.**  $^1\text{H}$  NMR Spectrum of **Cat-15** (400 MHz,  $\text{CDCl}_3$ )

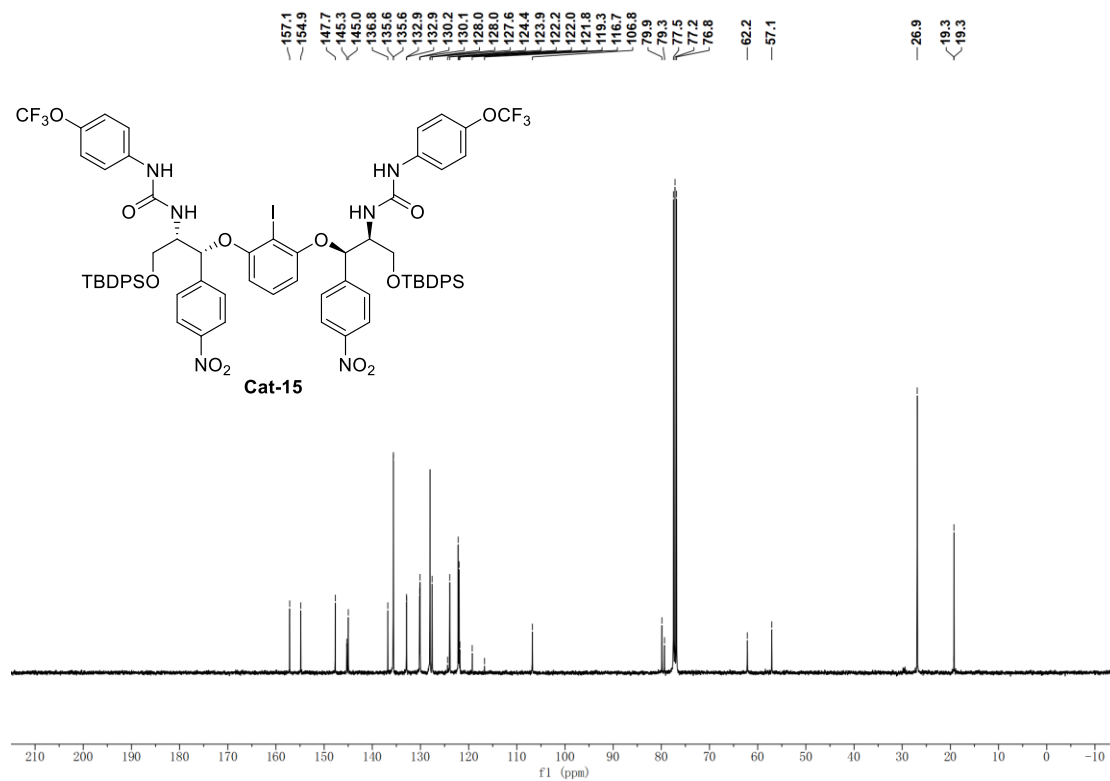

Supplementary Figure 45.  $^{13}\text{C}$  NMR Spectrum of **Cat-15** (100 MHz,  $\text{CDCl}_3$ )

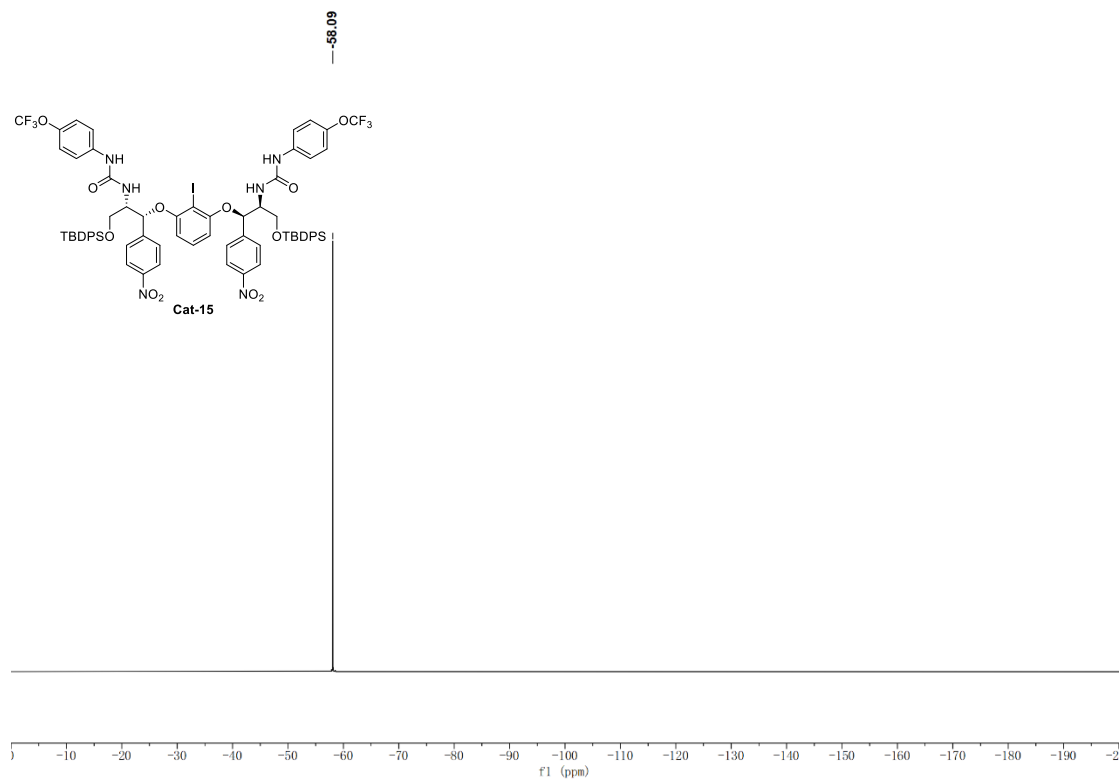

Supplementary Figure 46.  $^{19}\text{F}$  NMR Spectrum of **Cat-15** (376 MHz,  $\text{CDCl}_3$ )

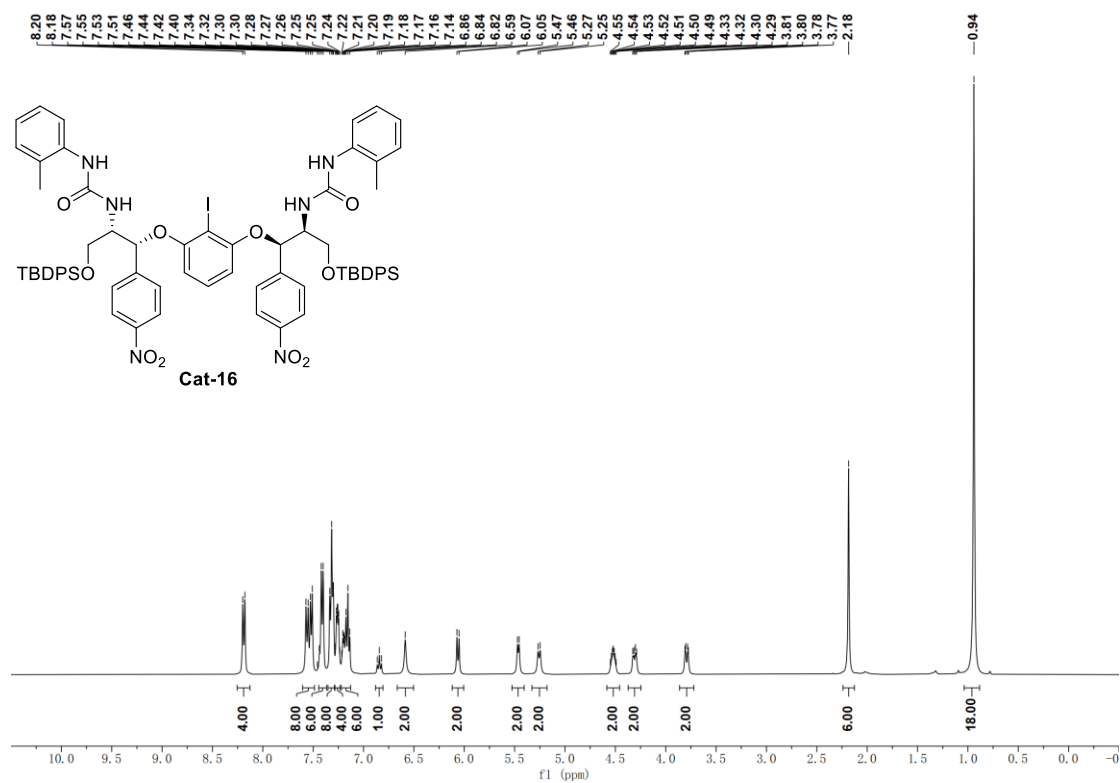

**Supplementary Figure 47.** <sup>1</sup>H NMR Spectrum of **Cat-16** (400 MHz, CDCl<sub>3</sub>)

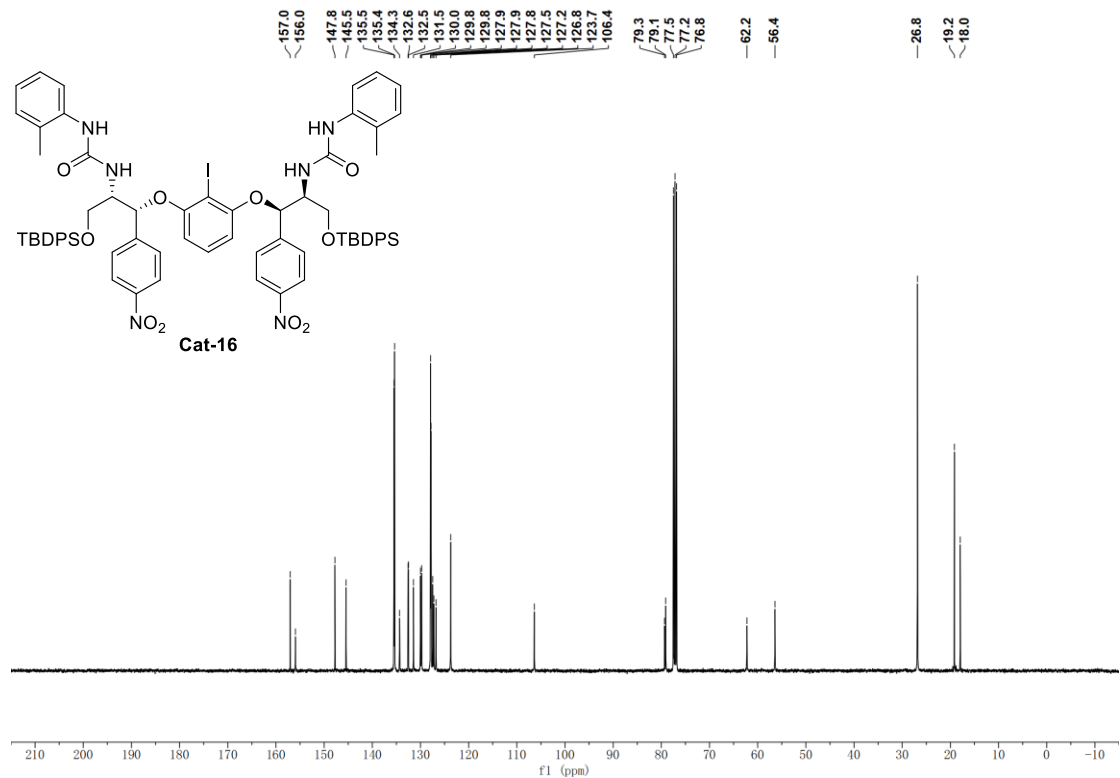

**Supplementary Figure 48.** <sup>13</sup>C NMR Spectrum of **Cat-16** (100 MHz, CDCl<sub>3</sub>)

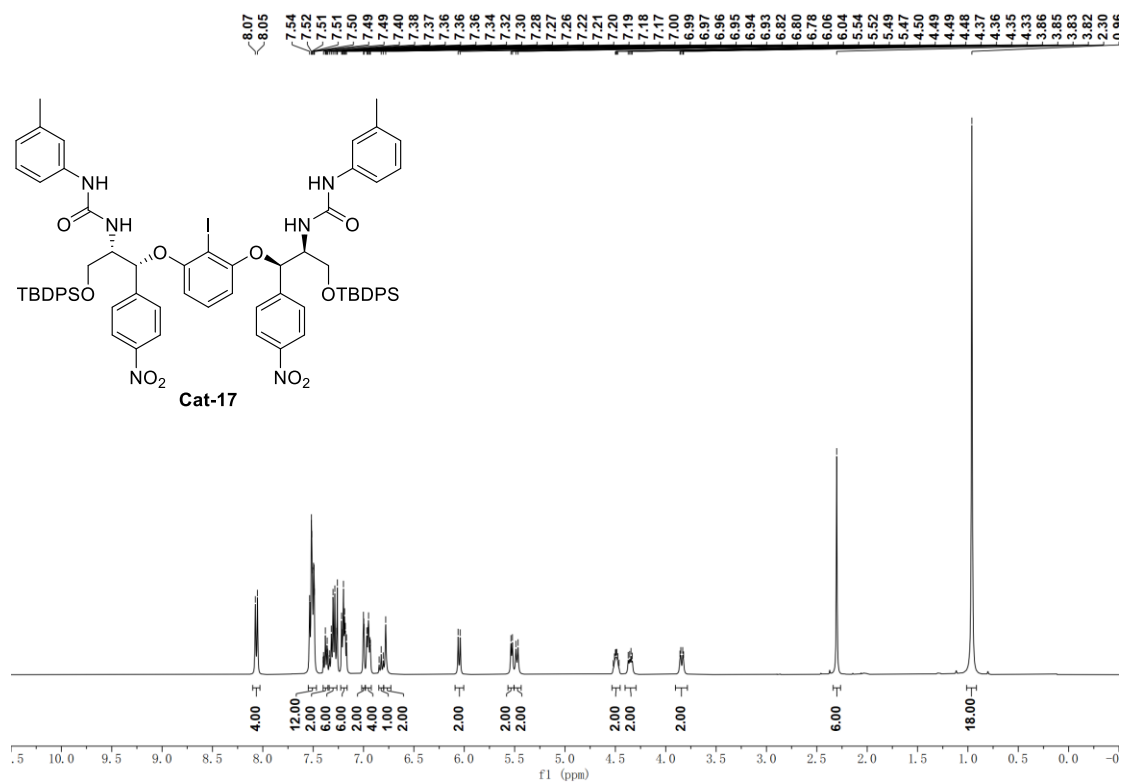

Supplementary Figure 49.  $^1\text{H}$  NMR Spectrum of **Cat-17** (400 MHz,  $\text{CDCl}_3$ )

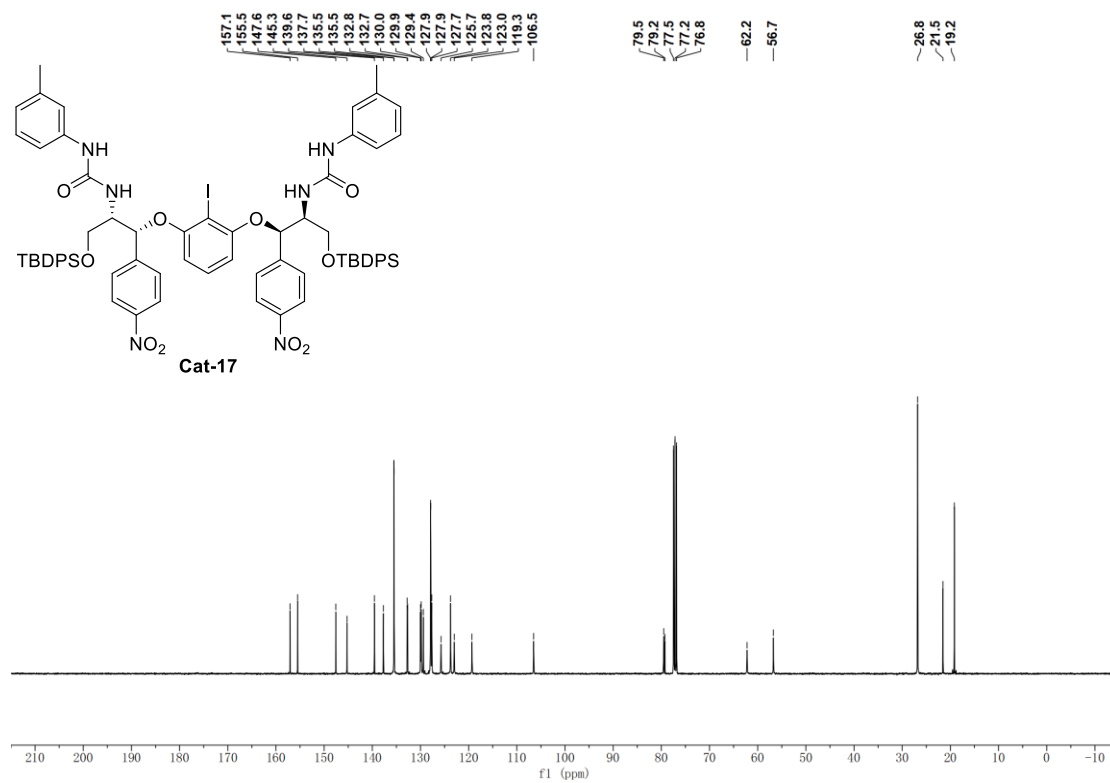

Supplementary Figure 50.  $^{13}\text{C}$  NMR Spectrum of **Cat-17** (100 MHz,  $\text{CDCl}_3$ )

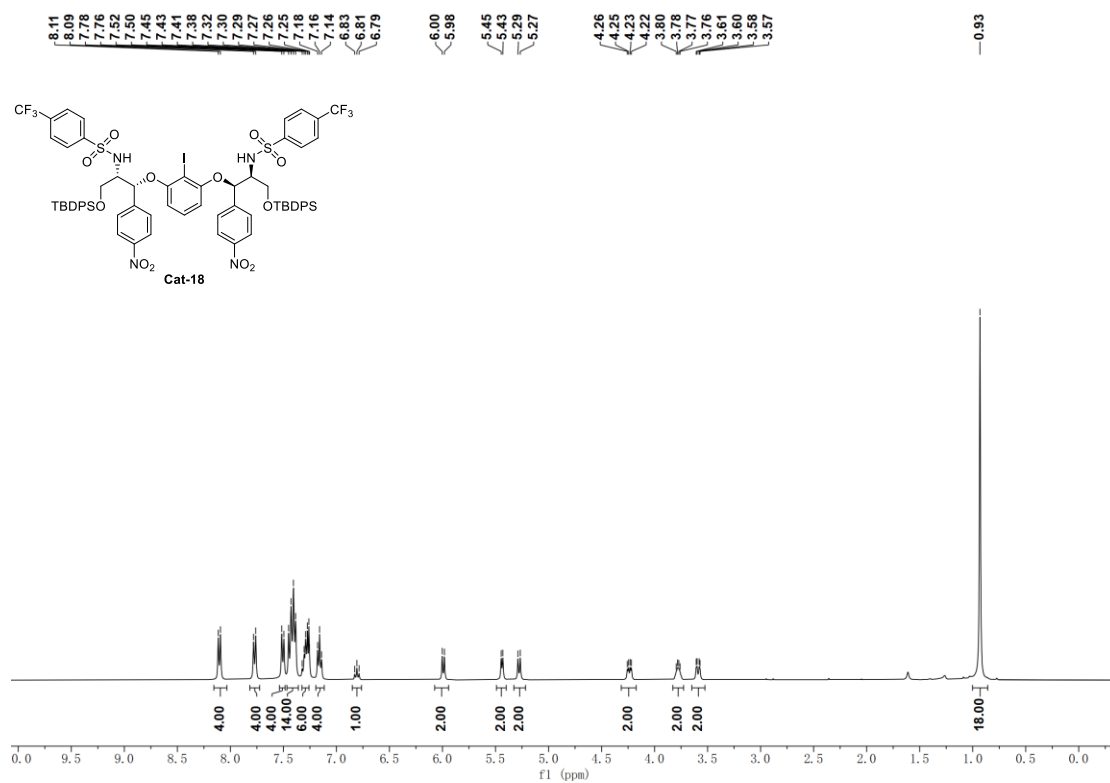

**Supplementary Figure 51.** <sup>1</sup>H NMR Spectrum of **Cat-18** (400 MHz, CDCl<sub>3</sub>)

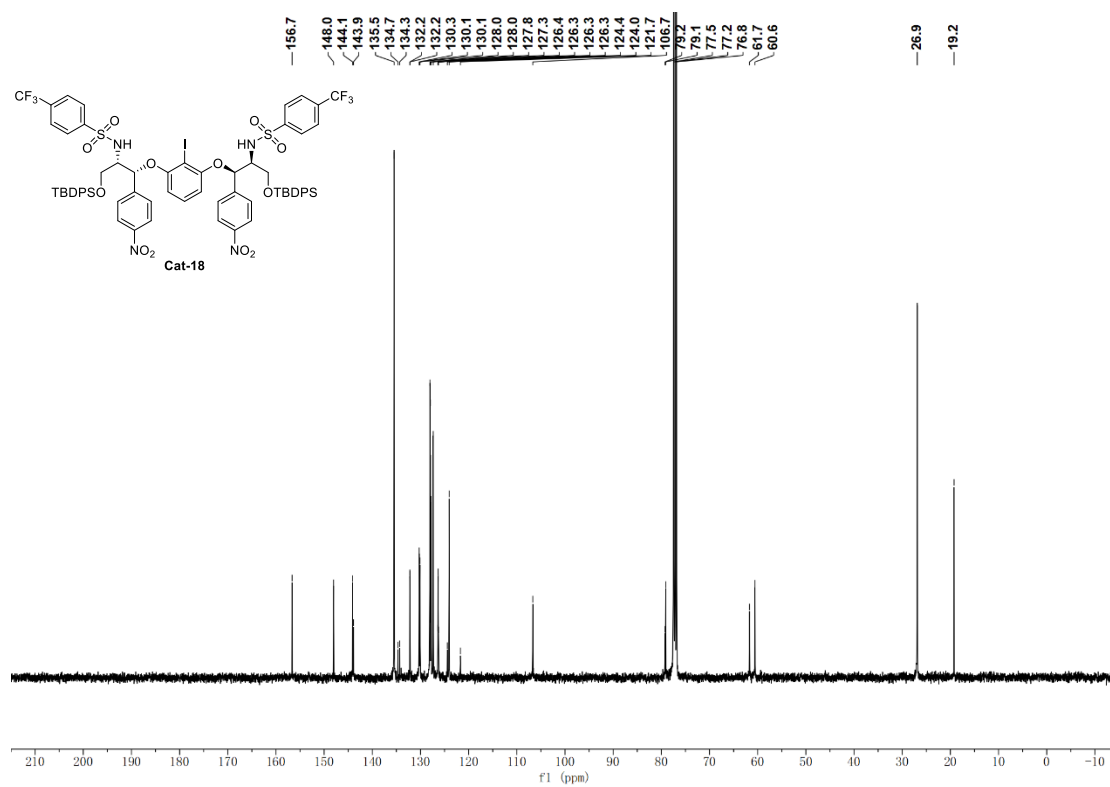

**Supplementary Figure 52.** <sup>13</sup>C NMR Spectrum of **Cat-18** (100 MHz, CDCl<sub>3</sub>)

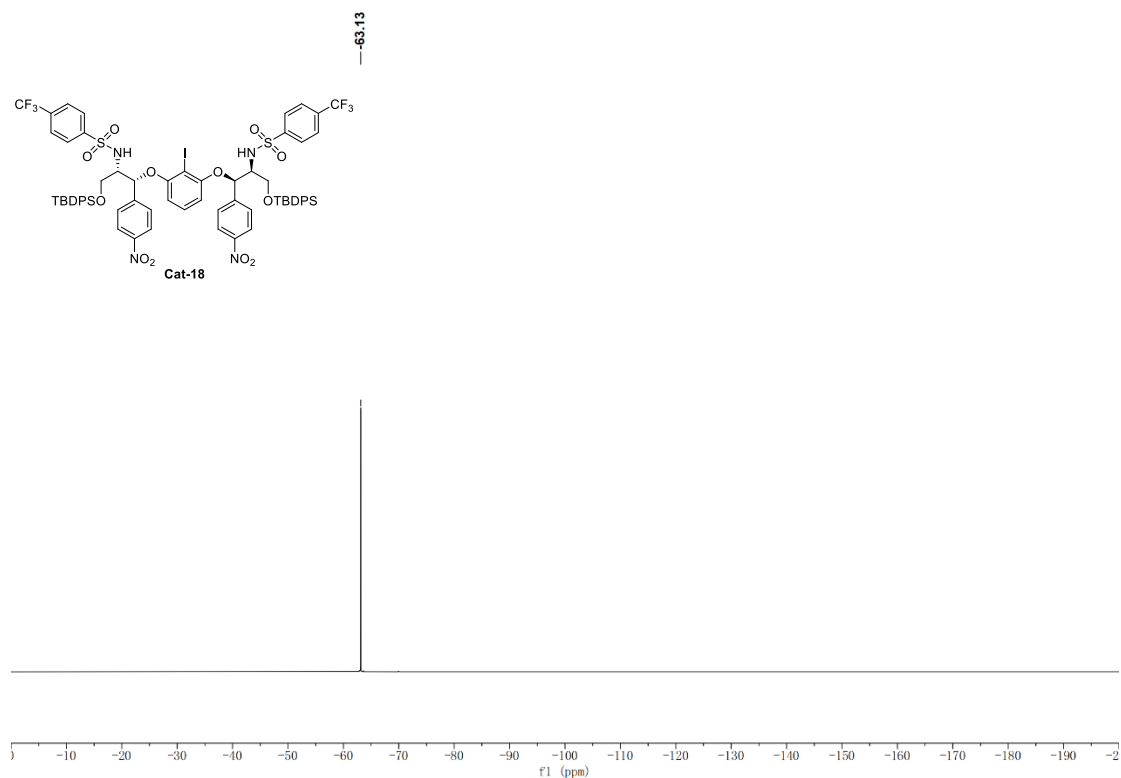

**Supplementary Figure 53.**  $^{19}\text{F}$  NMR Spectrum of **Cat-18** (376 MHz,  $\text{CDCl}_3$ )

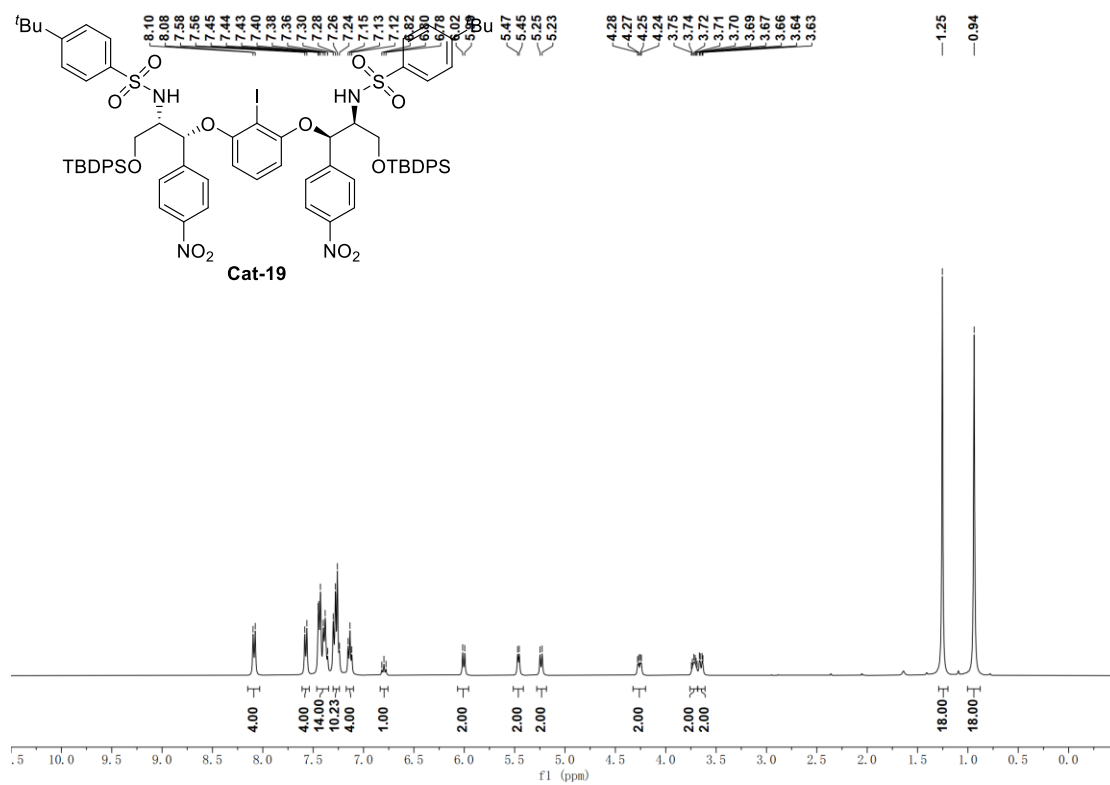

**Supplementary Figure 54.**  $^1\text{H}$  NMR Spectrum of **Cat-19** (400 MHz,  $\text{CDCl}_3$ )



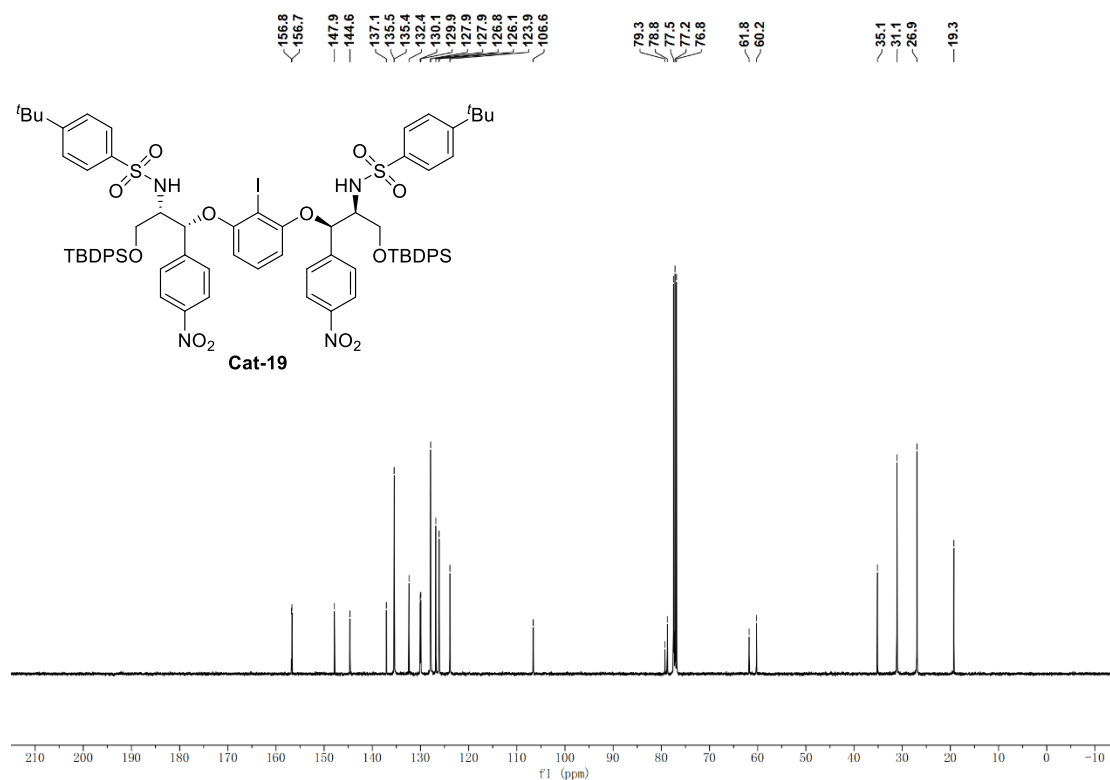

Supplementary Figure 55.  $^{13}\text{C}$  NMR Spectrum of **Cat-19** (100 MHz,  $\text{CDCl}_3$ )

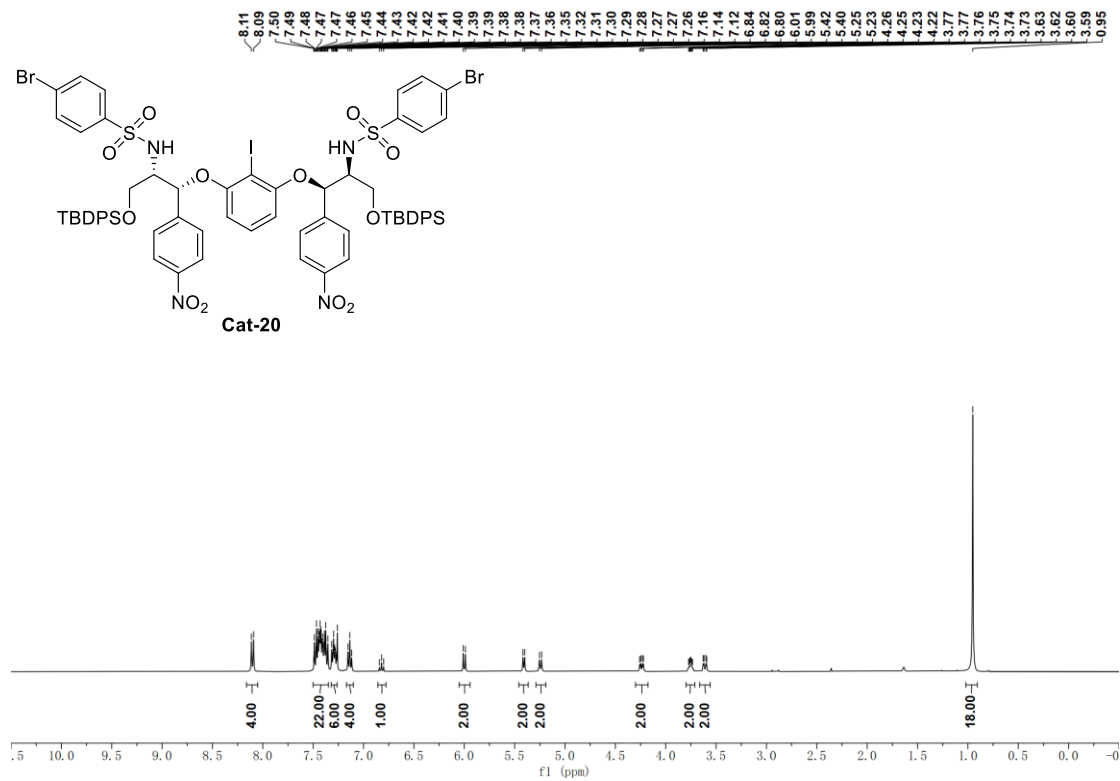

Supplementary Figure 56.  $^1\text{H}$  NMR Spectrum of **Cat-20** (400 MHz,  $\text{CDCl}_3$ )

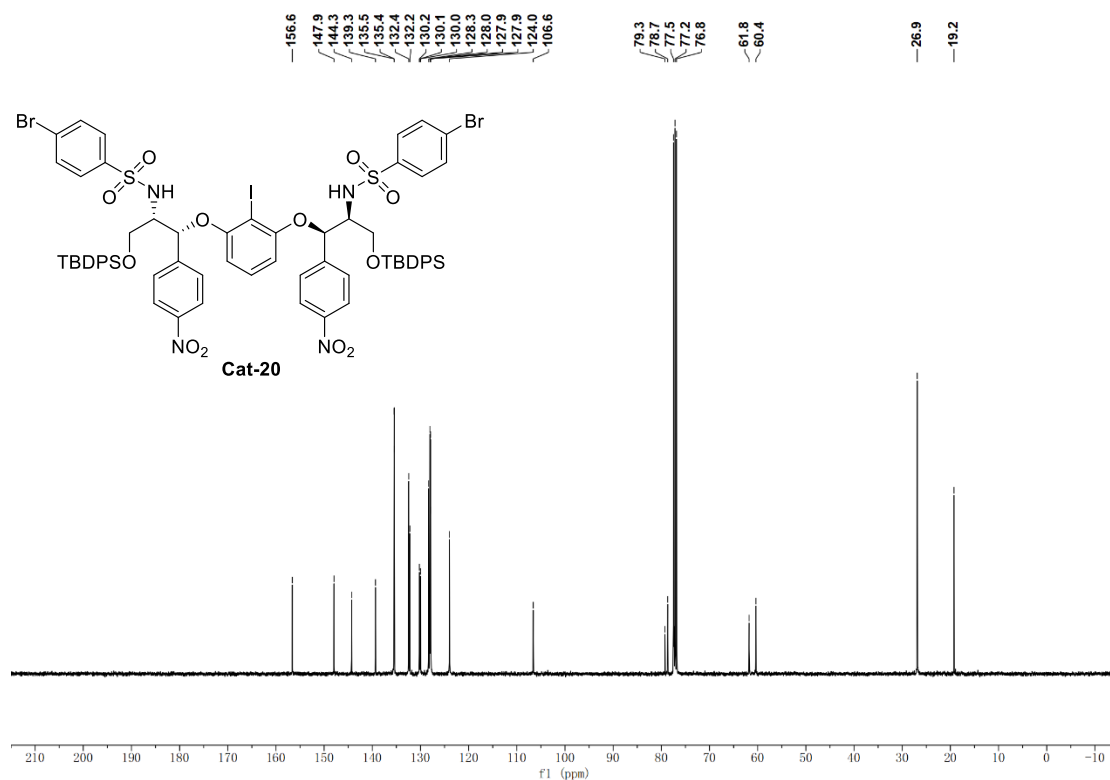

**Supplementary Figure 57.**  $^{13}\text{C}$  NMR Spectrum of **Cat-20** (100 MHz,  $\text{CDCl}_3$ )

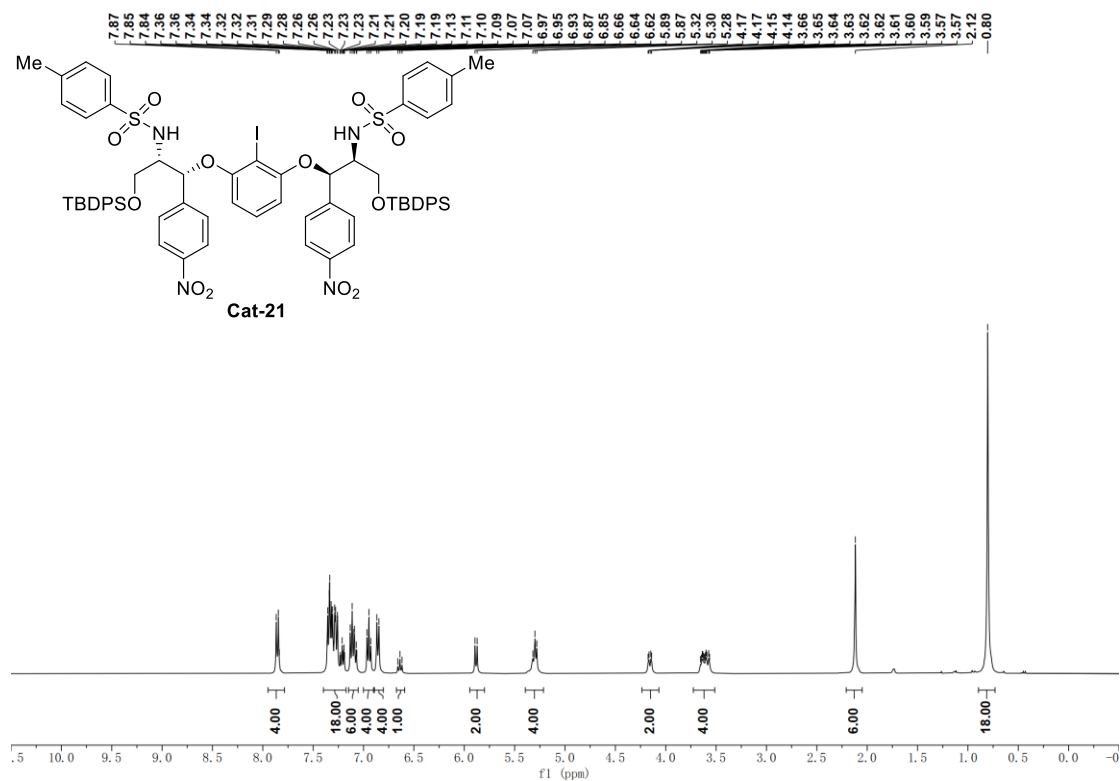

**Supplementary Figure 58.**  $^1\text{H}$  NMR Spectrum of **Cat-21** (400 MHz,  $\text{CDCl}_3$ )

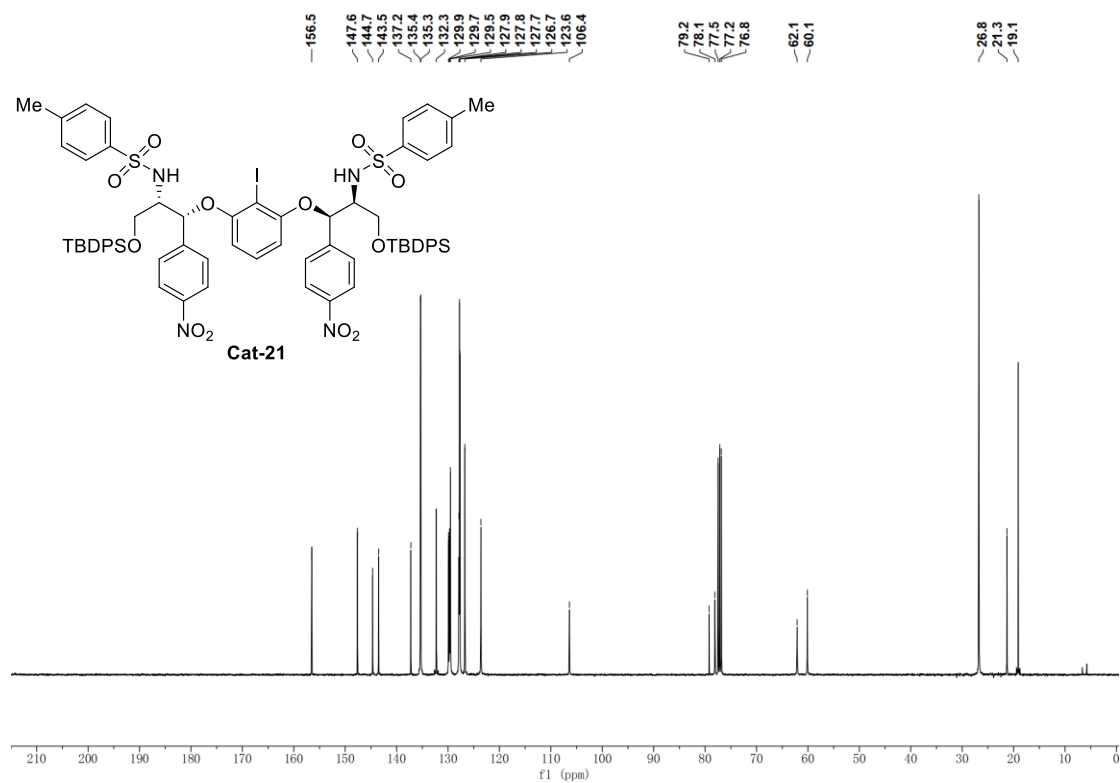

**Supplementary Figure 59.**  $^{13}\text{C}$  NMR Spectrum of **Cat-21** (100 MHz,  $\text{CDCl}_3$ )

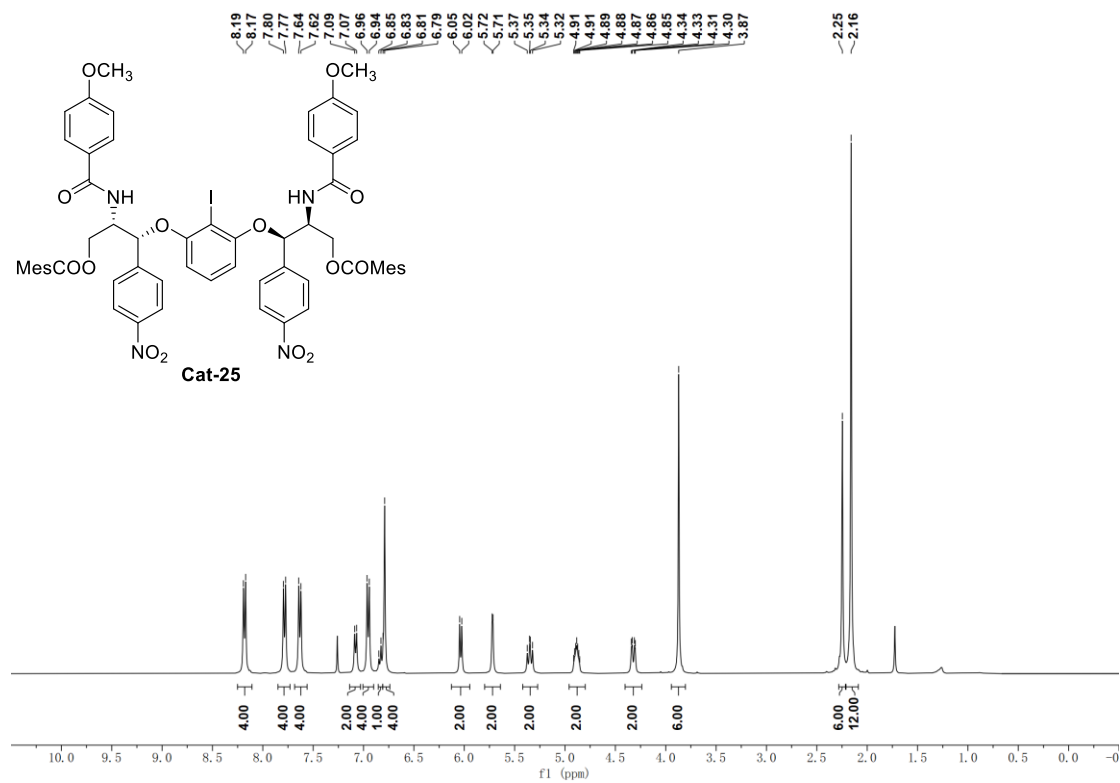

**Supplementary Figure 60.**  $^1\text{H}$  NMR Spectrum of **Cat-25** (400 MHz,  $\text{CDCl}_3$ )

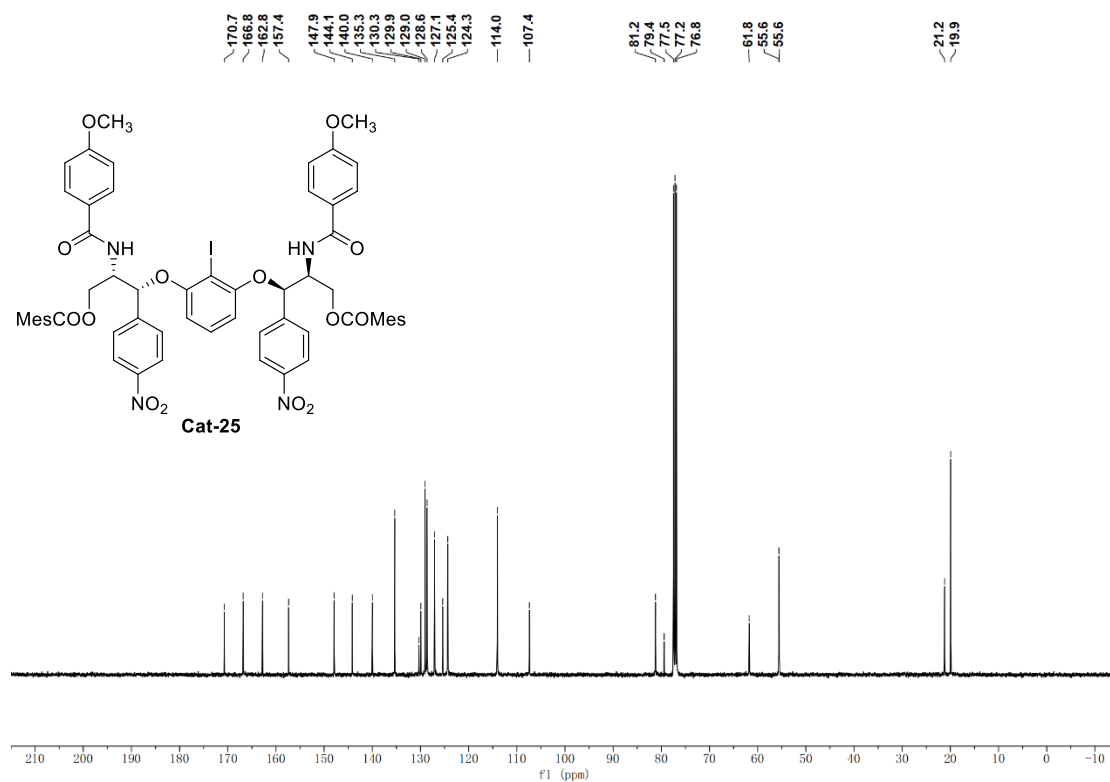

**Supplementary Figure 61.**  $^{13}\text{C}$  NMR Spectrum of **Cat-25** (100 MHz,  $\text{CDCl}_3$ )

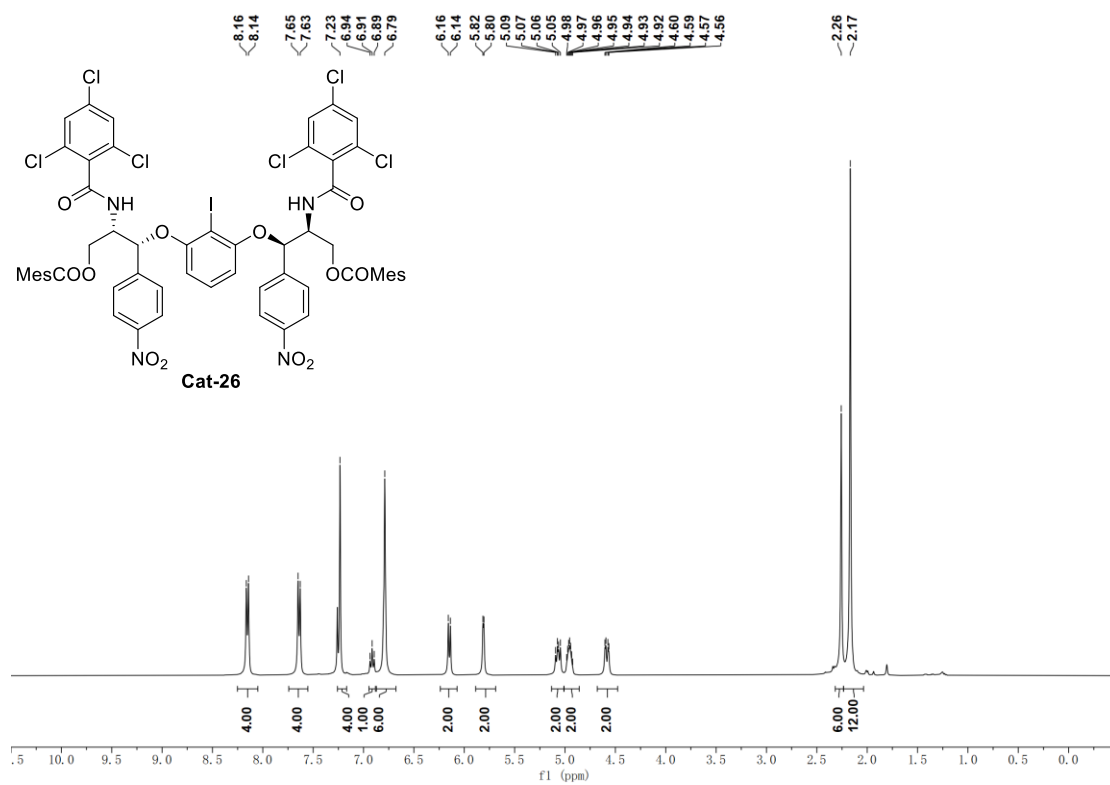

**Supplementary Figure 62.**  $^1\text{H}$  NMR Spectrum of **Cat-26** (400 MHz,  $\text{CDCl}_3$ )

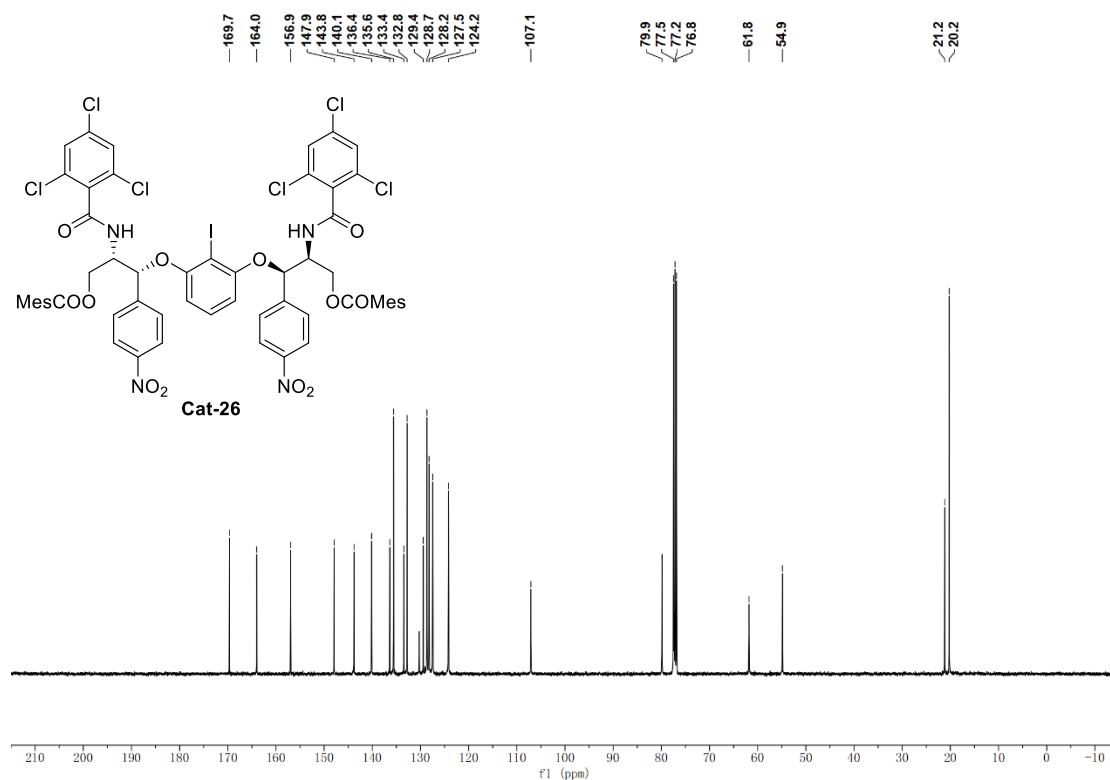

**Supplementary Figure 63.**  $^{13}\text{C}$  NMR Spectrum of **Cat-26** (100 MHz,  $\text{CDCl}_3$ )

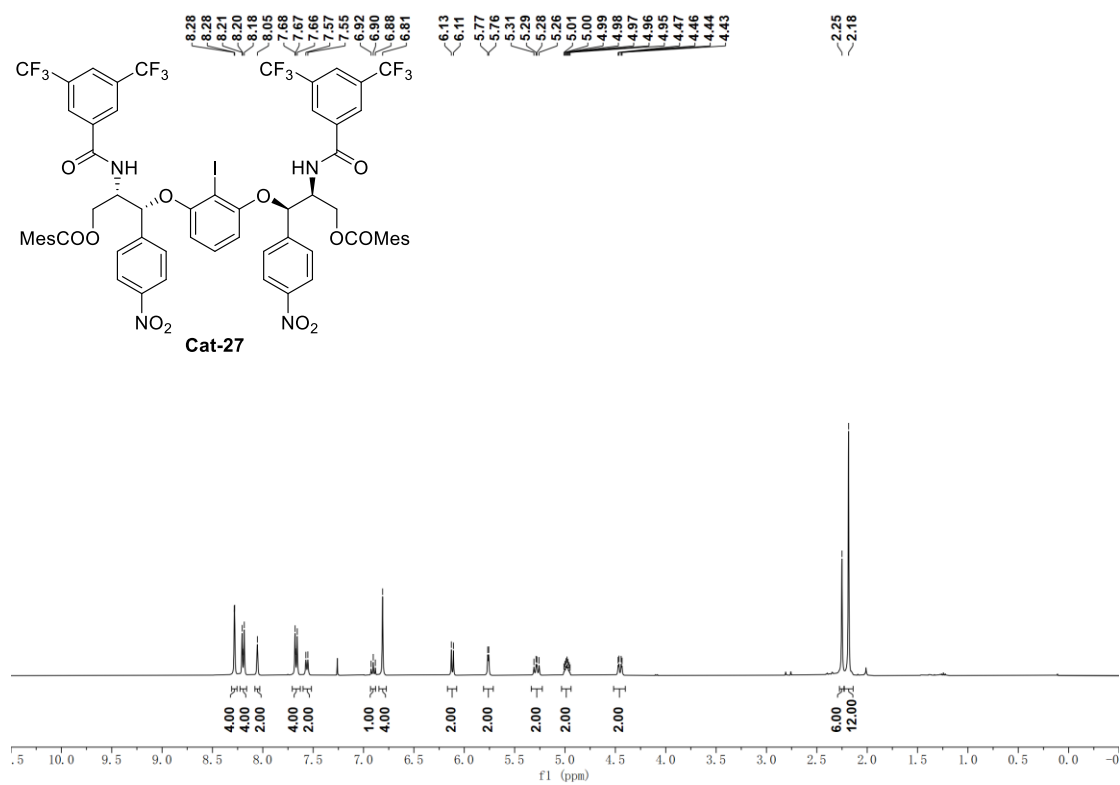

**Supplementary Figure 64.**  $^1\text{H}$  NMR Spectrum of **Cat-27** (400 MHz,  $\text{CDCl}_3$ )

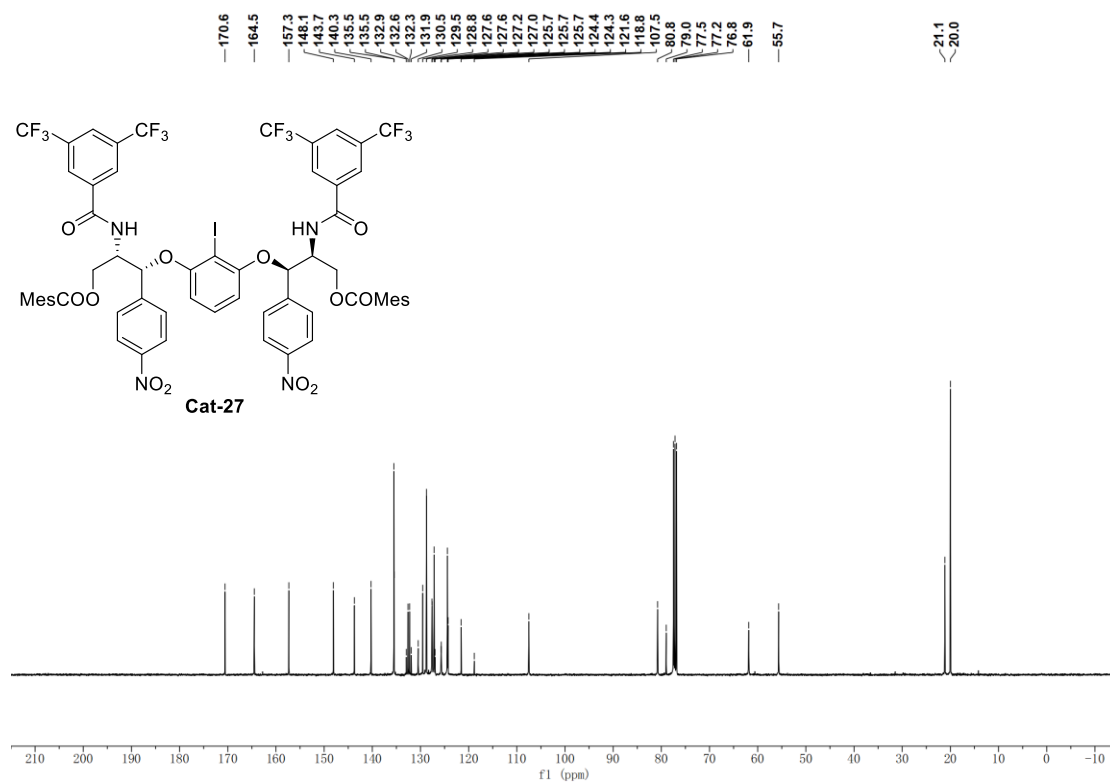

**Supplementary Figure 65.**  $^{13}\text{C}$  NMR Spectrum of **Cat-27** (100 MHz,  $\text{CDCl}_3$ )

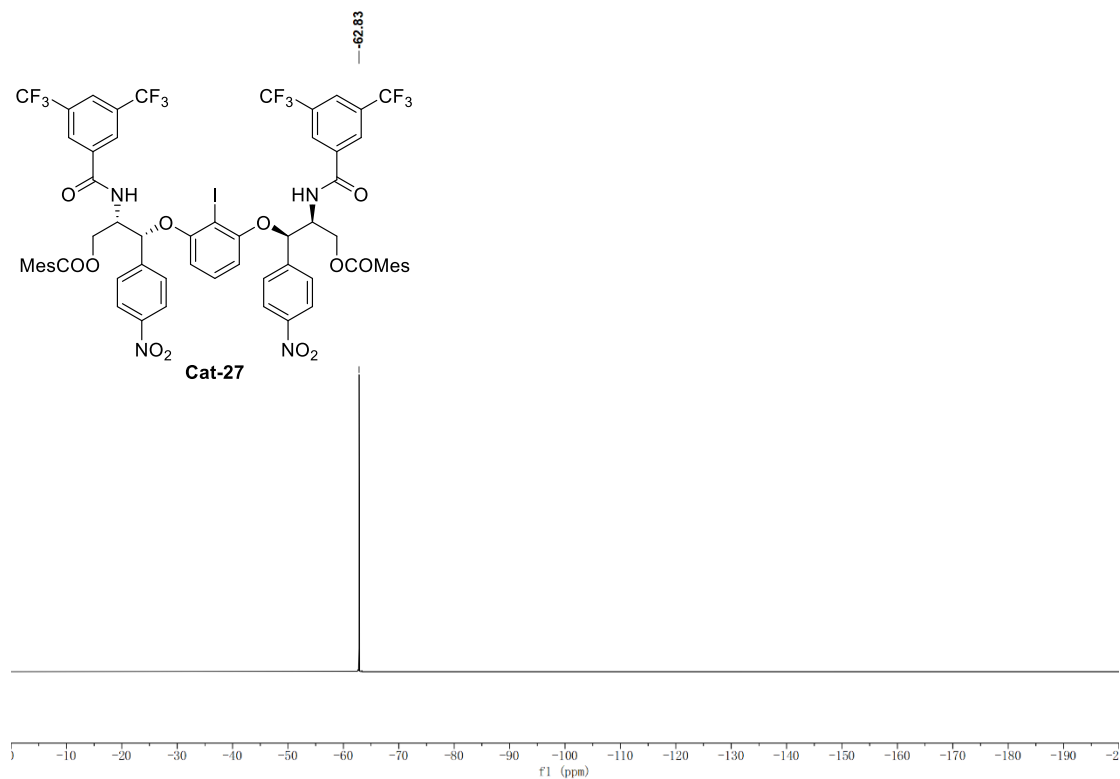

**Supplementary Figure 66.**  $^{19}\text{F}$  NMR Spectrum of **Cat-27** (376 MHz,  $\text{CDCl}_3$ )

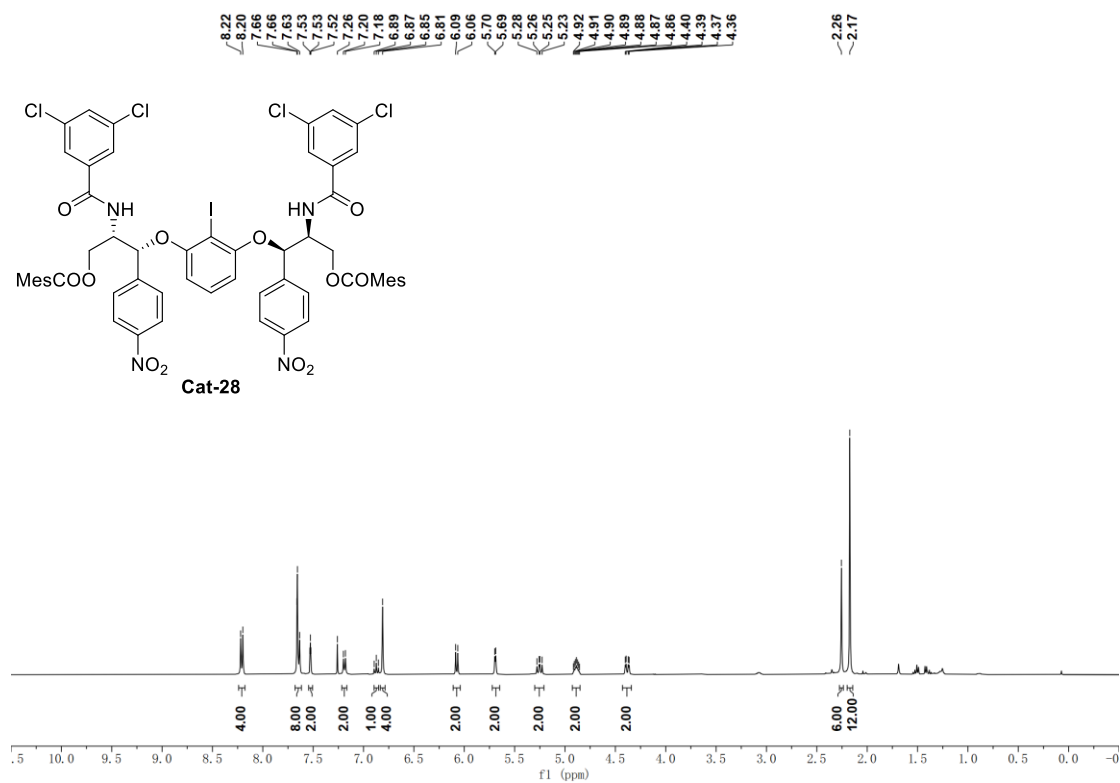

**Supplementary Figure 67.** <sup>1</sup>H NMR Spectrum of **Cat-28** (400 MHz, CDCl<sub>3</sub>)

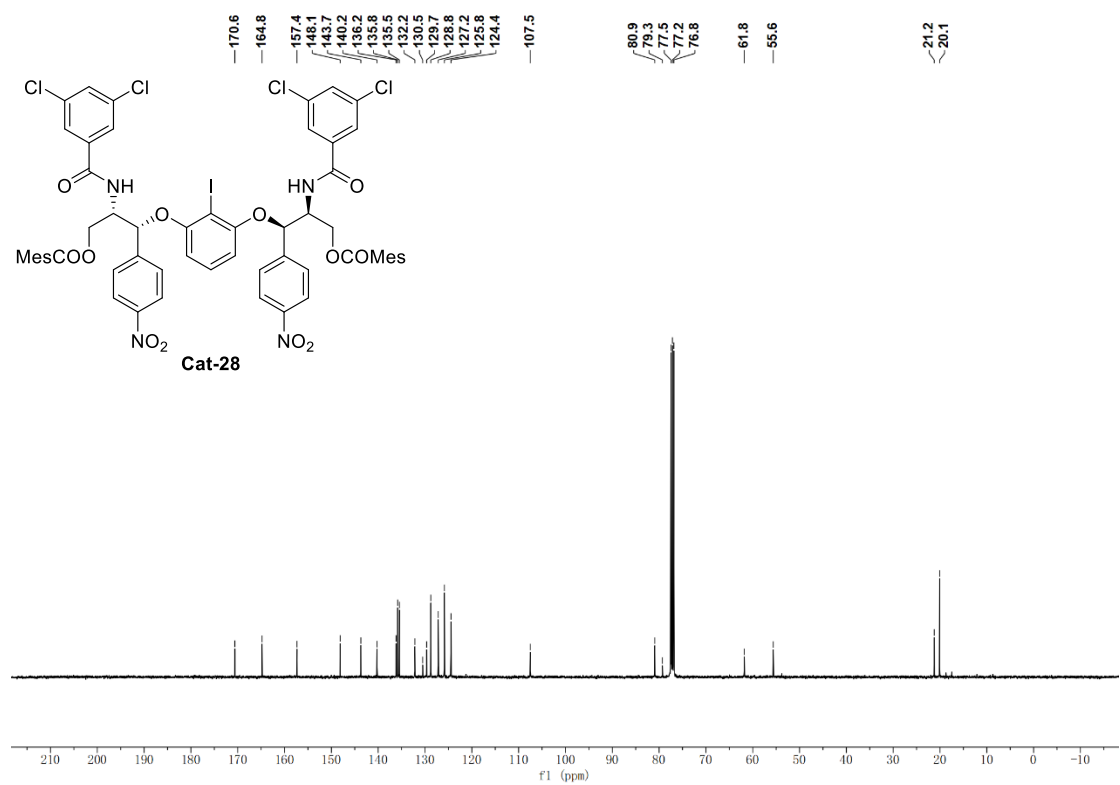

**Supplementary Figure 68.** <sup>13</sup>C NMR Spectrum of **Cat-28** (100 MHz, CDCl<sub>3</sub>)

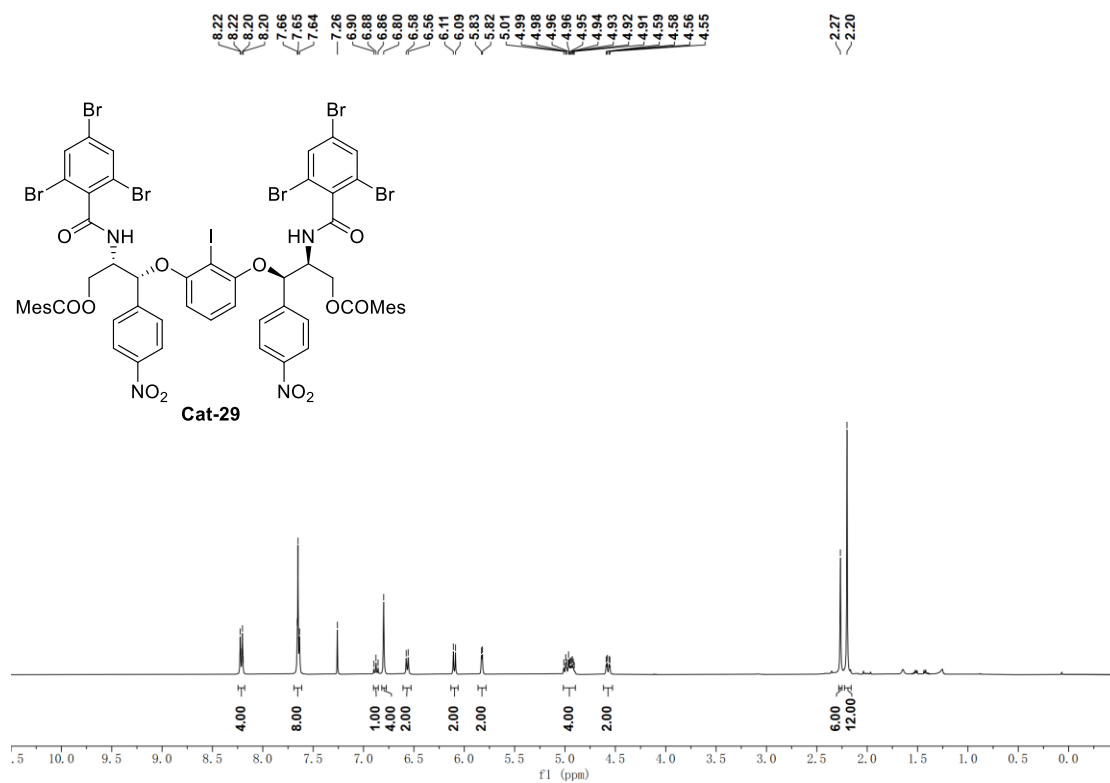

Supplementary Figure 69. <sup>1</sup>H NMR Spectrum of Cat-29 (400 MHz, CDCl<sub>3</sub>)

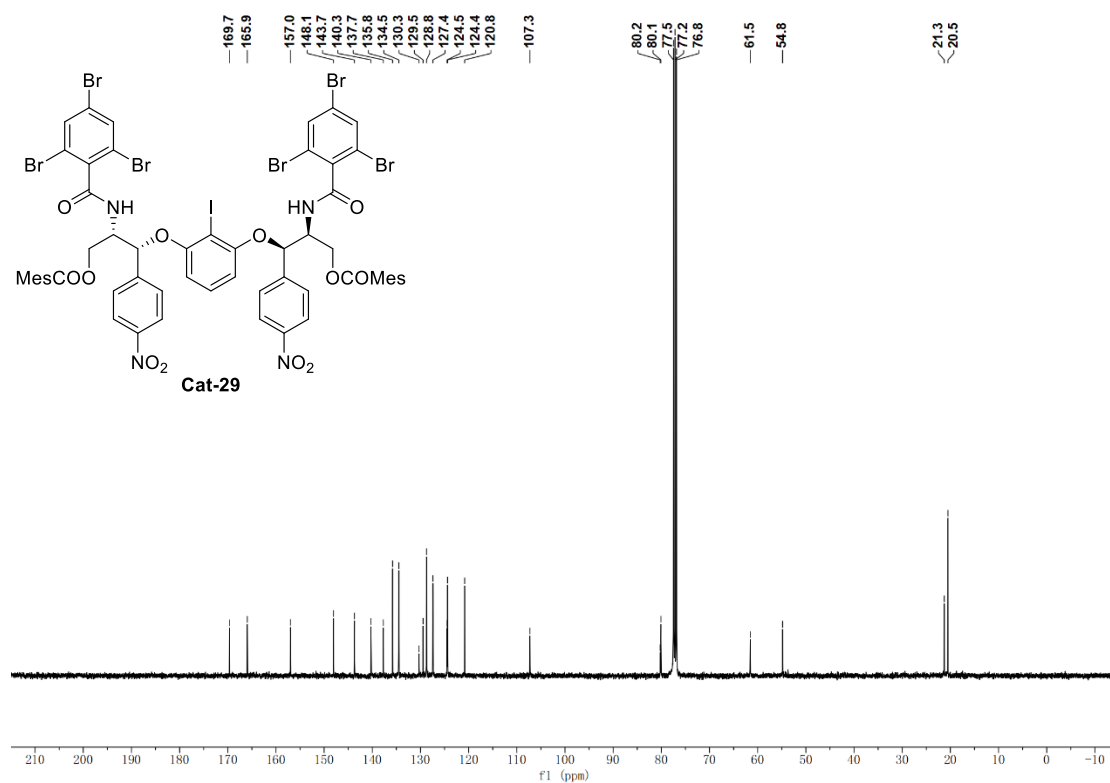

Supplementary Figure 70. <sup>13</sup>C NMR Spectrum of Cat-29 (100 MHz, CDCl<sub>3</sub>)



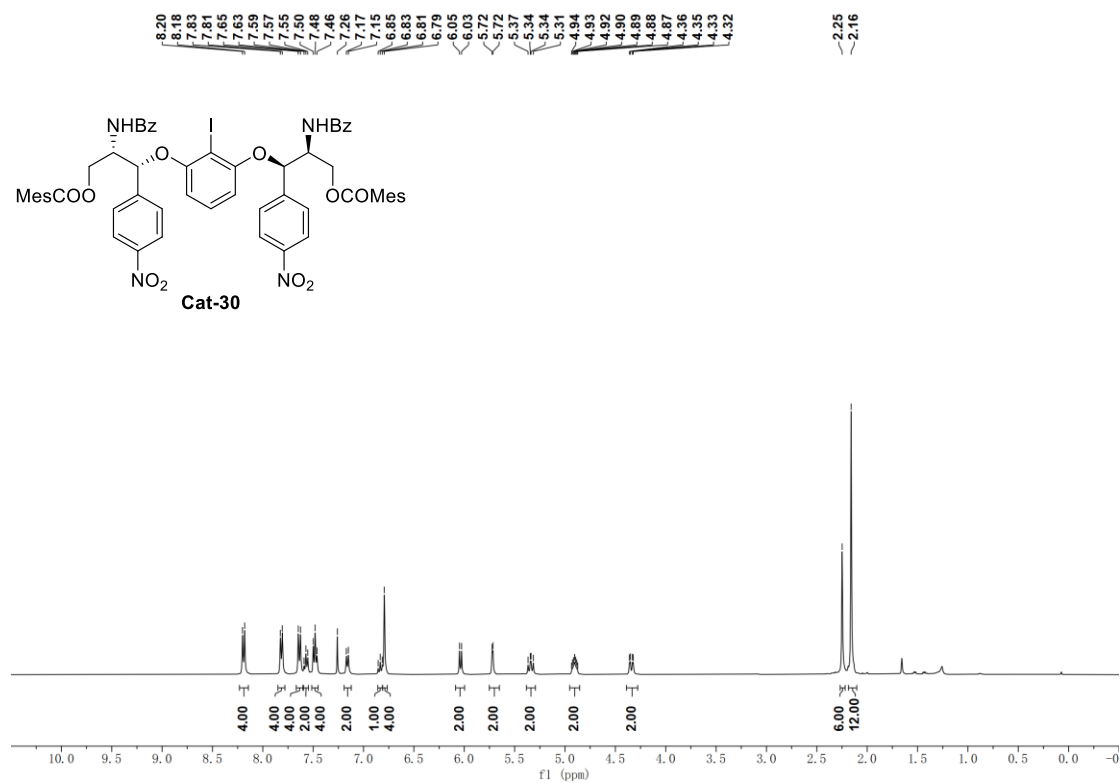

**Supplementary Figure 71.** <sup>1</sup>H NMR Spectrum of **Cat-30** (400 MHz, CDCl<sub>3</sub>)

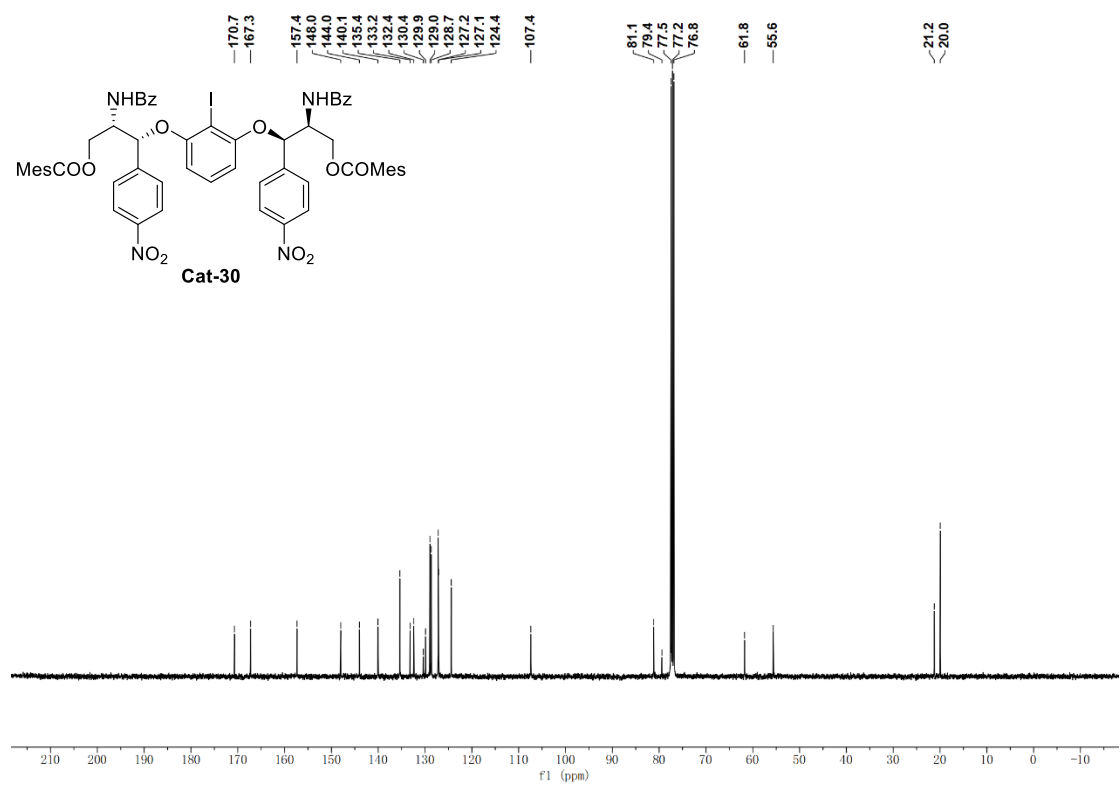

**Supplementary Figure 72.** <sup>13</sup>C NMR Spectrum of **Cat-30** (100 MHz, CDCl<sub>3</sub>)

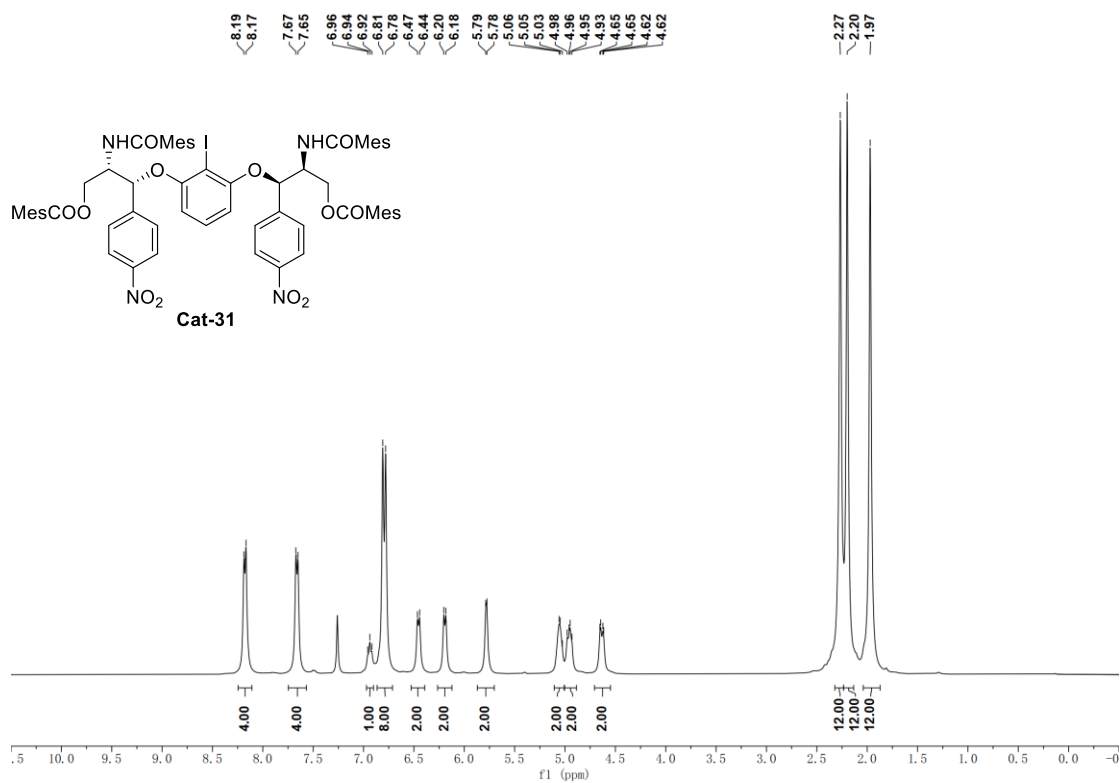

**Supplementary Figure 73.** <sup>1</sup>H NMR Spectrum of **Cat-31** (400 MHz, CDCl<sub>3</sub>)

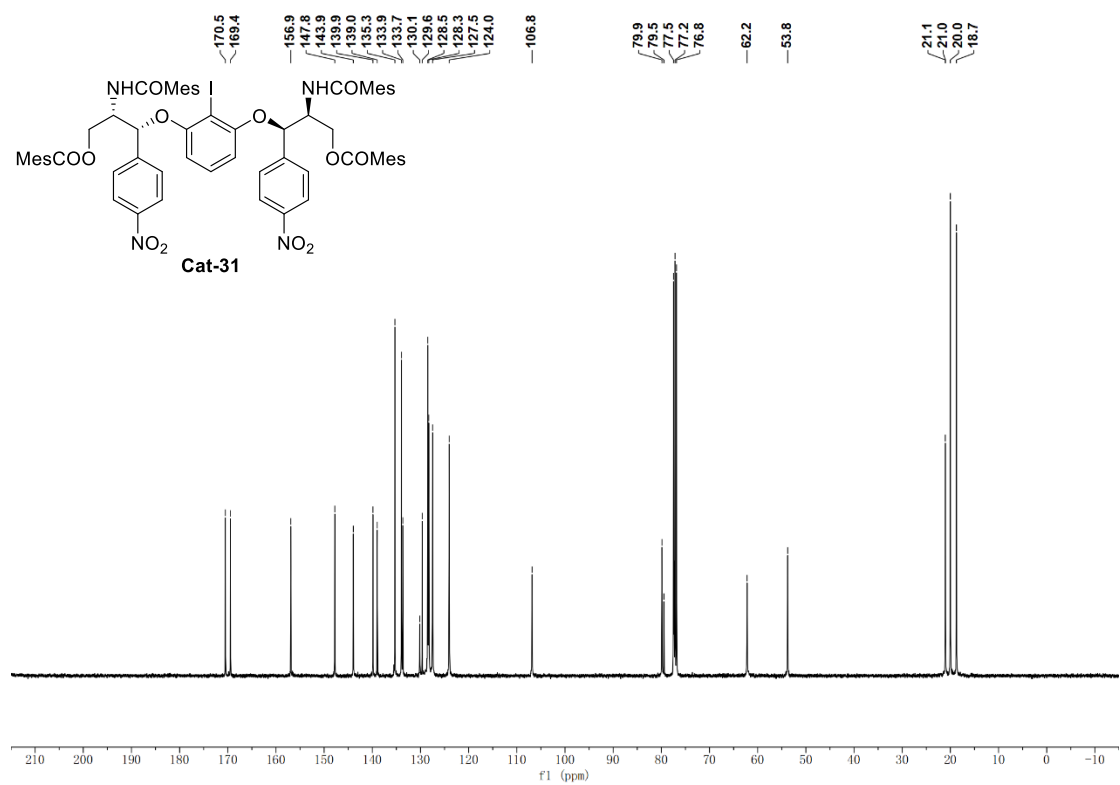

**Supplementary Figure 74.** <sup>13</sup>C NMR Spectrum of **Cat-31** (100 MHz, CDCl<sub>3</sub>)

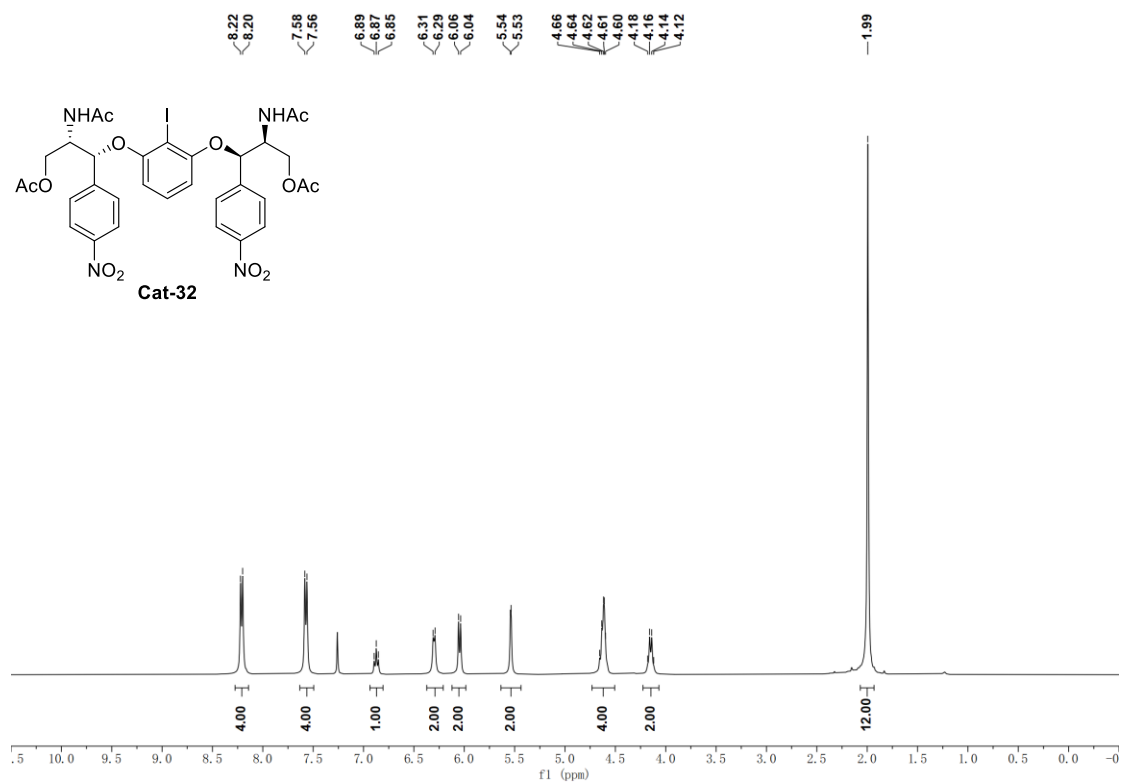

**Supplementary Figure 75.** <sup>1</sup>H NMR Spectrum of **Cat-32** (400 MHz, CDCl<sub>3</sub>)

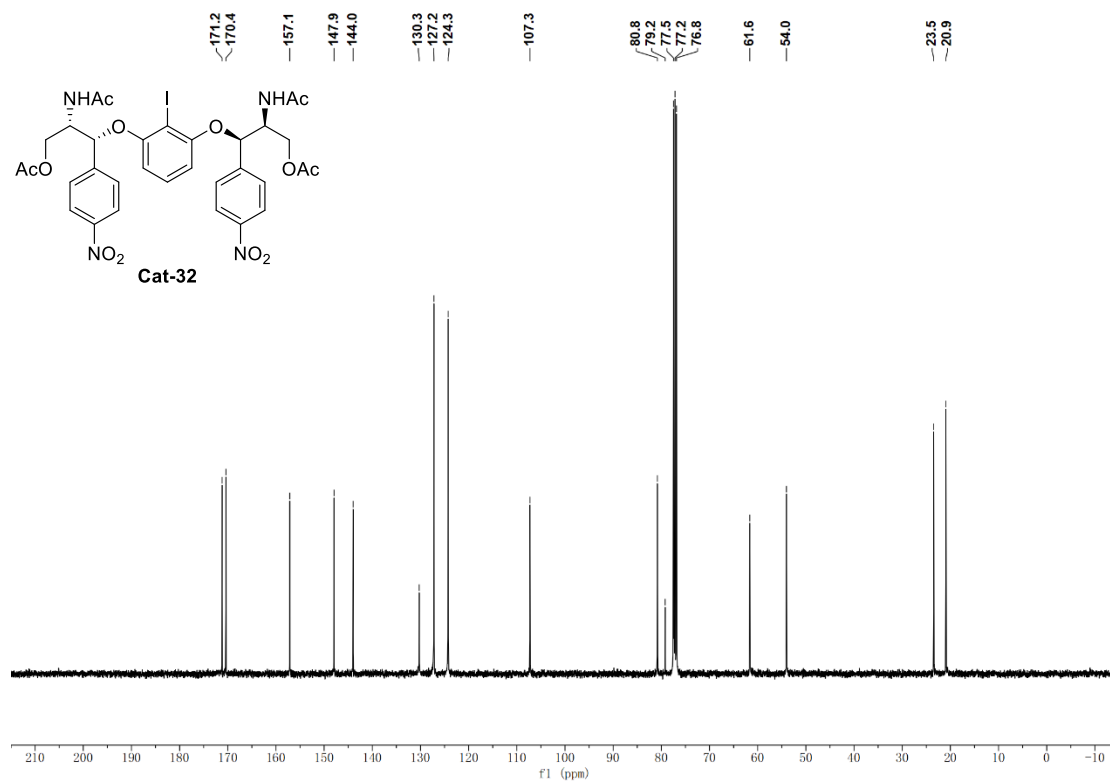

**Supplementary Figure 76.** <sup>13</sup>C NMR Spectrum of **Cat-32** (100 MHz, CDCl<sub>3</sub>)

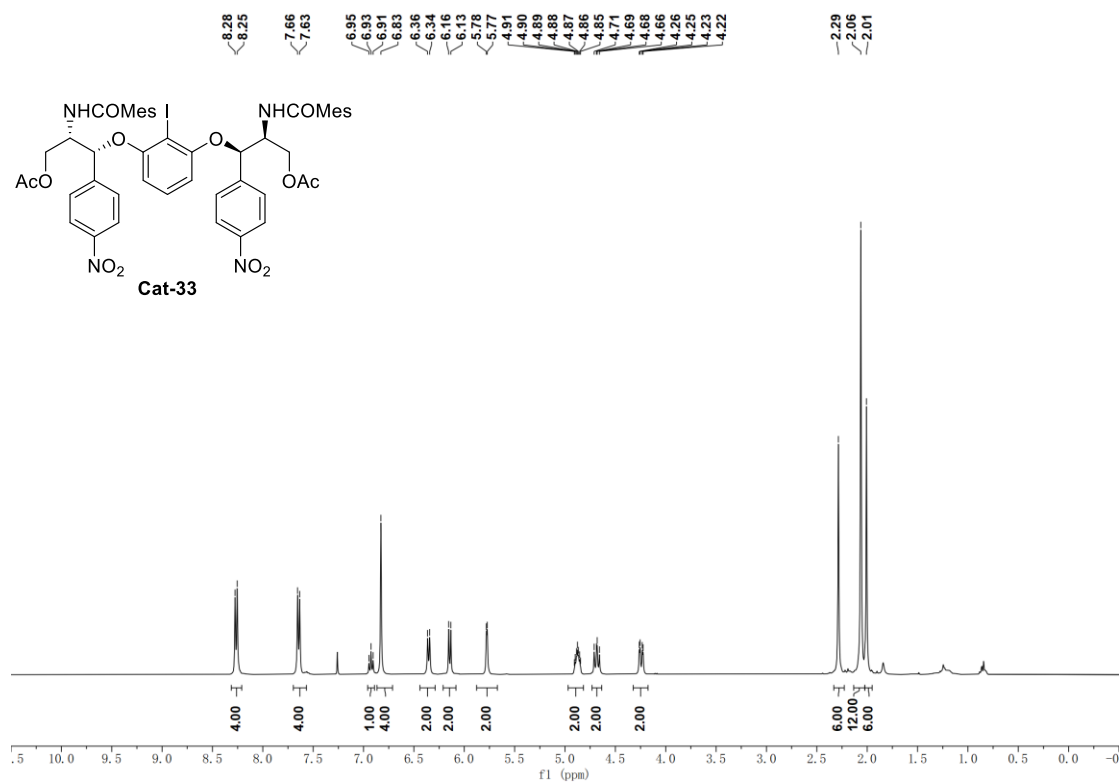

**Supplementary Figure 77.** <sup>1</sup>H NMR Spectrum of **Cat-33** (400 MHz, CDCl<sub>3</sub>)

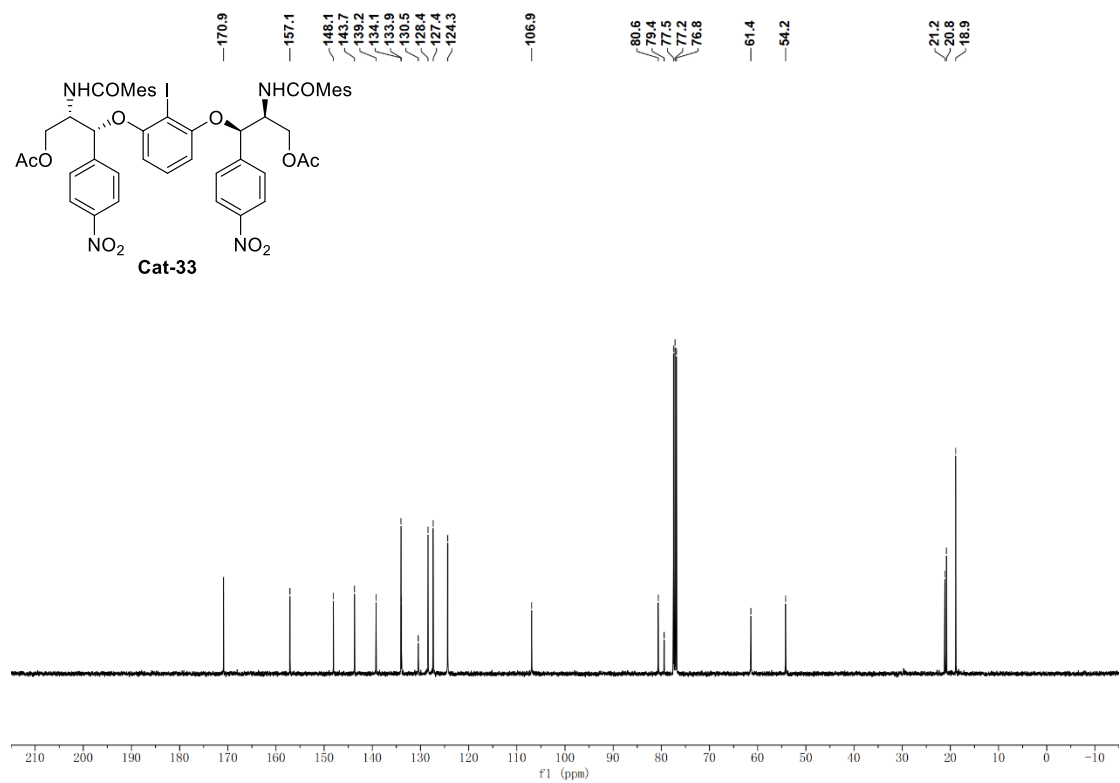

**Supplementary Figure 78.** <sup>13</sup>C NMR Spectrum of **Cat-33** (100 MHz, CDCl<sub>3</sub>)

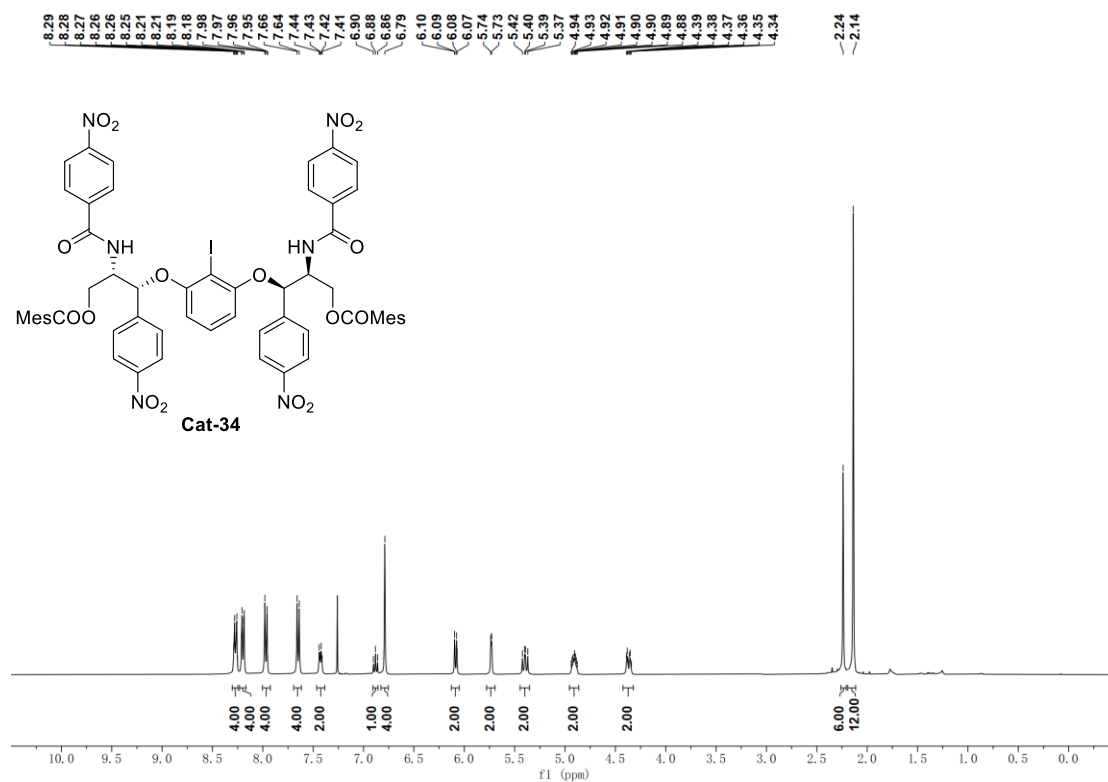

**Supplementary Figure 79.** <sup>1</sup>H NMR Spectrum of **Cat-34** (400 MHz, CDCl<sub>3</sub>)

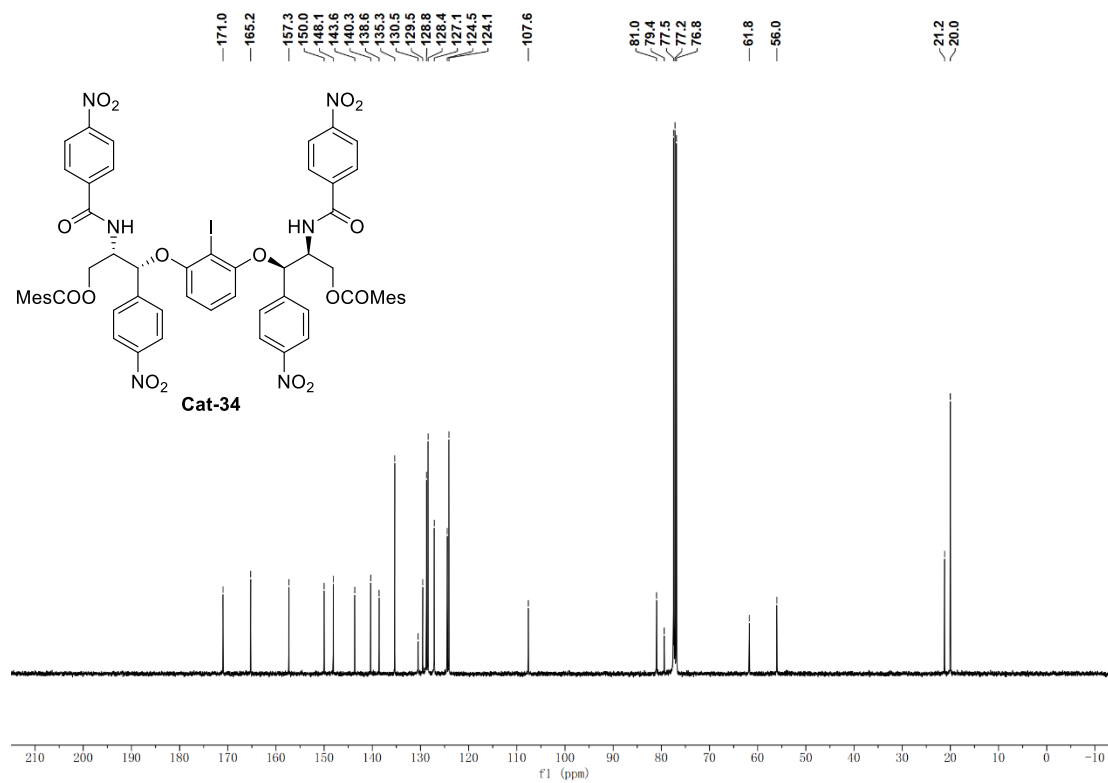

**Supplementary Figure 80.** <sup>13</sup>C NMR Spectrum of **Cat-34** (100 MHz, CDCl<sub>3</sub>)

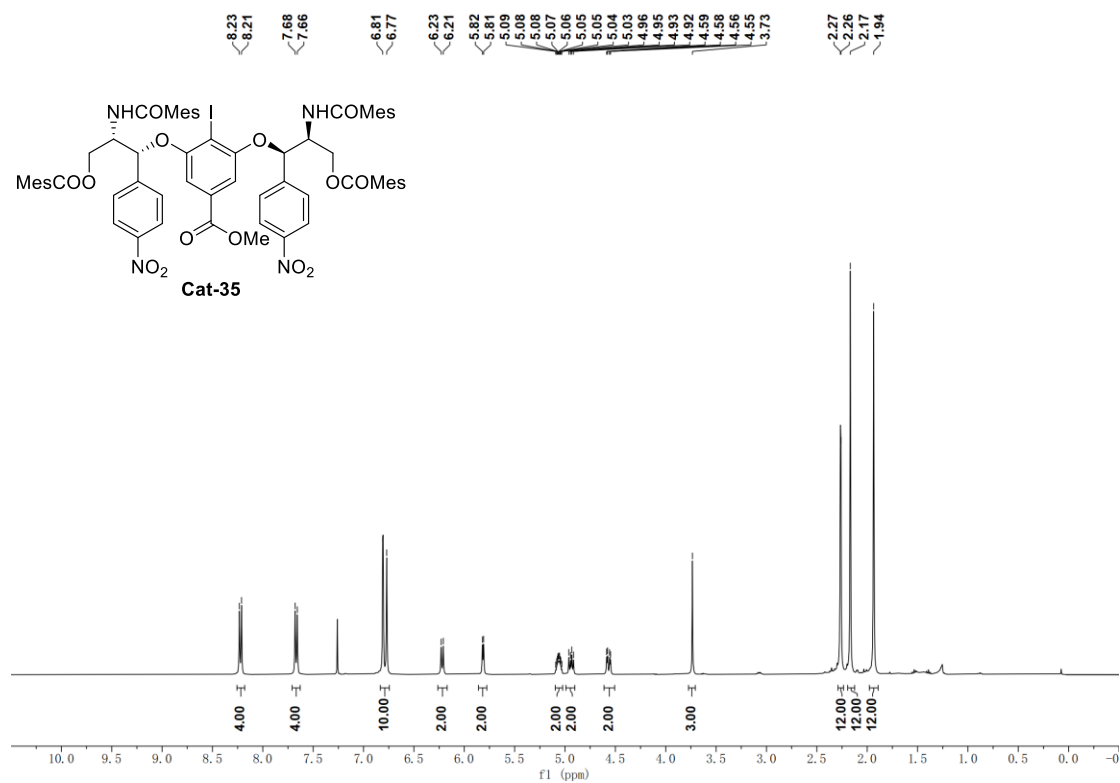

**Supplementary Figure 81.** <sup>1</sup>H NMR Spectrum of **Cat-35** (400 MHz, CDCl<sub>3</sub>)

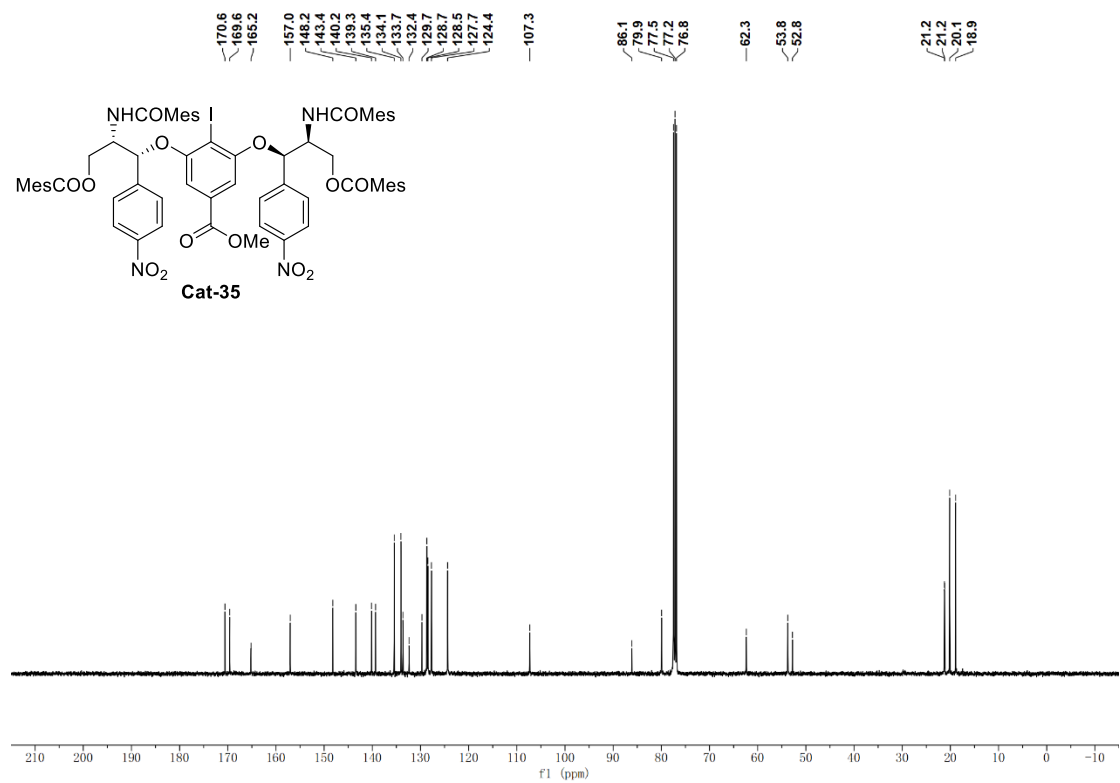

**Supplementary Figure 82.** <sup>13</sup>C NMR Spectrum of **Cat-35** (100 MHz, CDCl<sub>3</sub>)

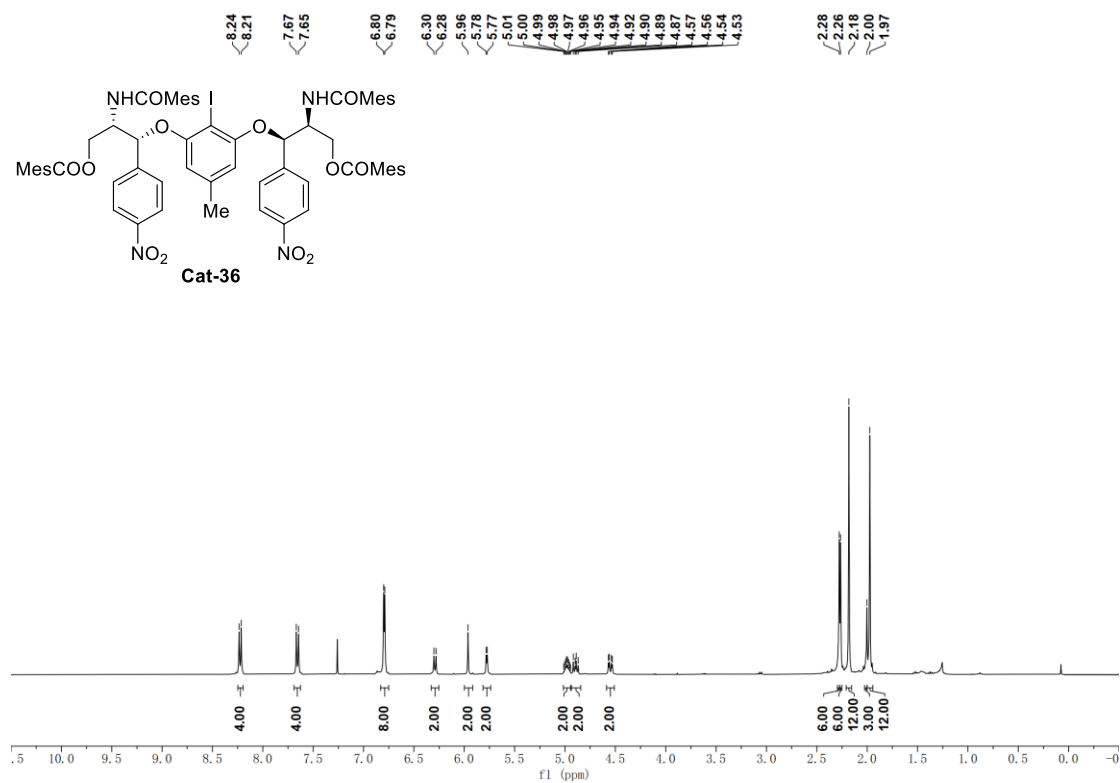

**Supplementary Figure 83.** <sup>1</sup>H NMR Spectrum of **Cat-36** (400 MHz, CDCl<sub>3</sub>)

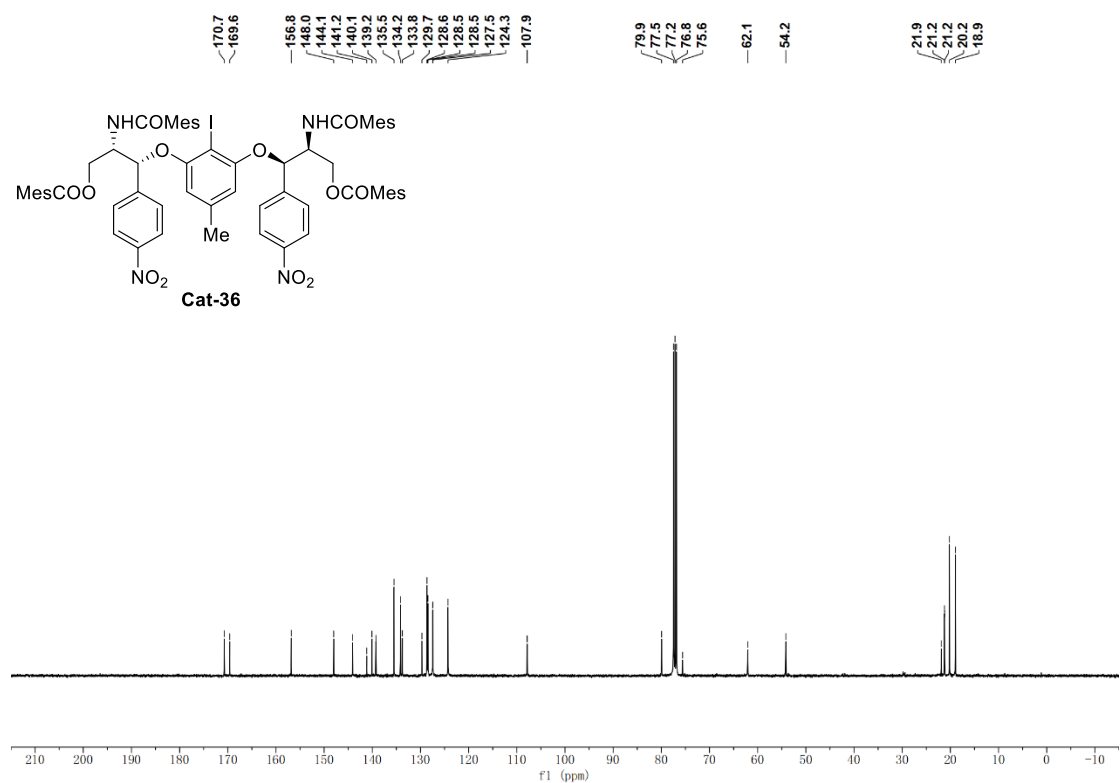

**Supplementary Figure 84.** <sup>13</sup>C NMR Spectrum of **Cat-36** (100 MHz, CDCl<sub>3</sub>)

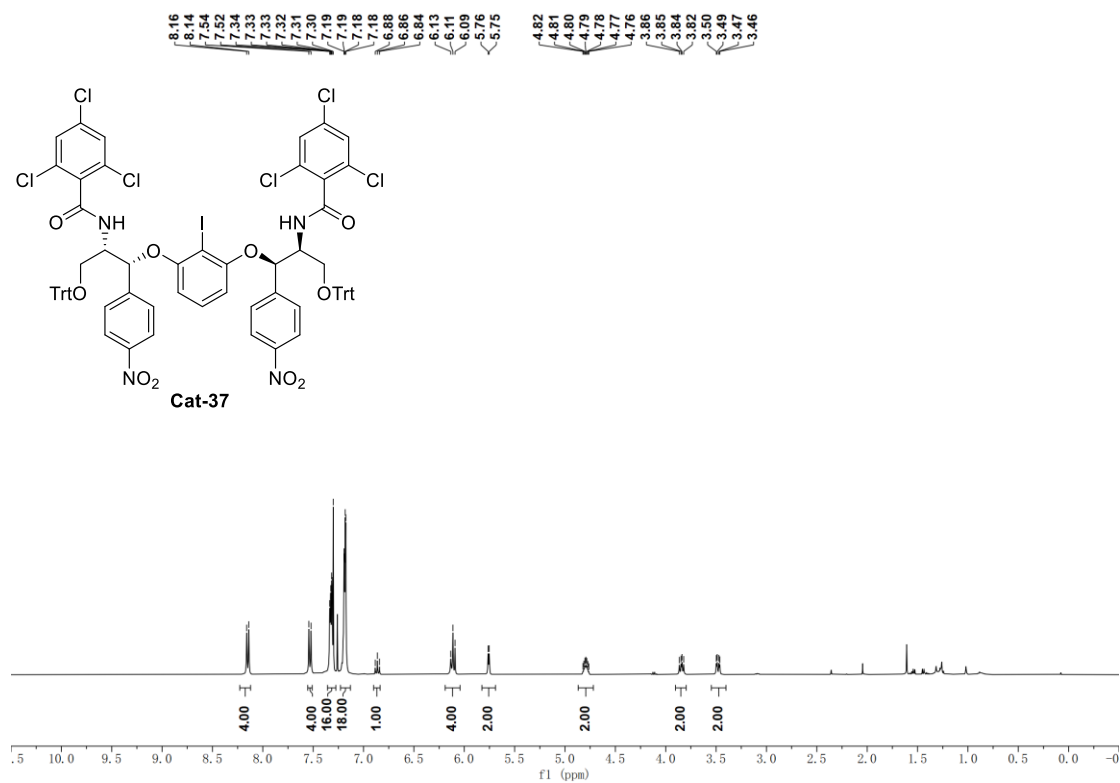

**Supplementary Figure 85.** <sup>1</sup>H NMR Spectrum of **Cat-37** (400 MHz, CDCl<sub>3</sub>)

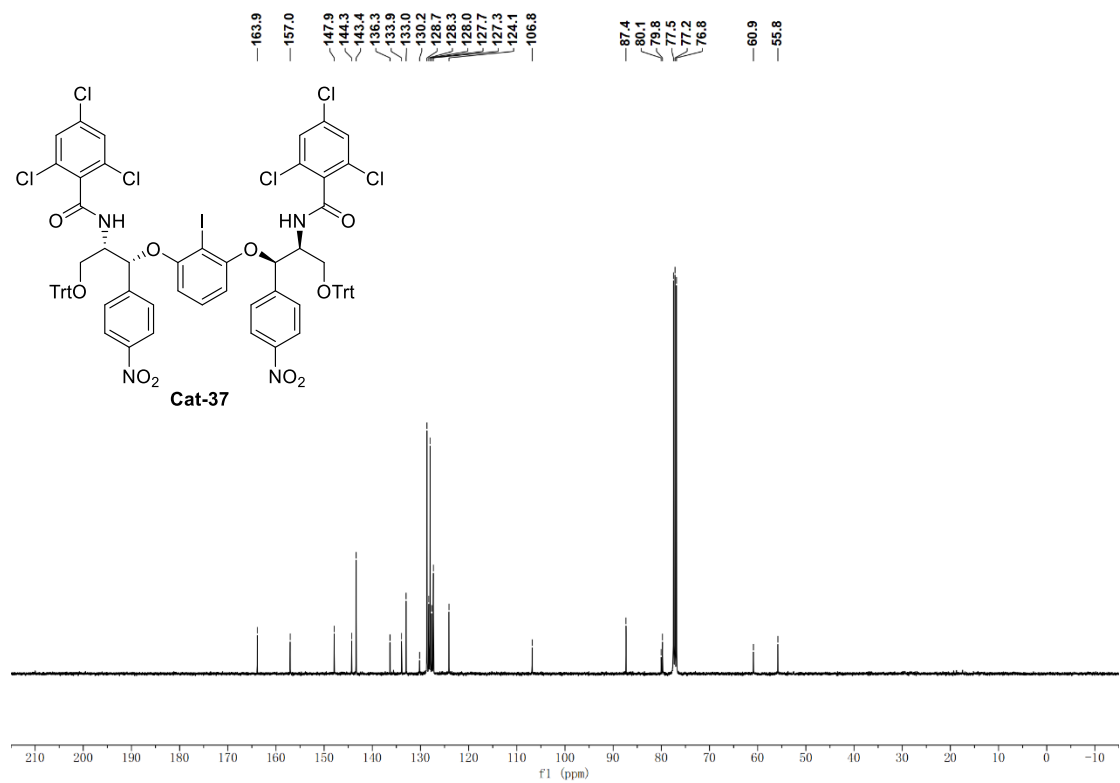

**Supplementary Figure 86.** <sup>13</sup>C NMR Spectrum of **Cat-37** (100 MHz, CDCl<sub>3</sub>)



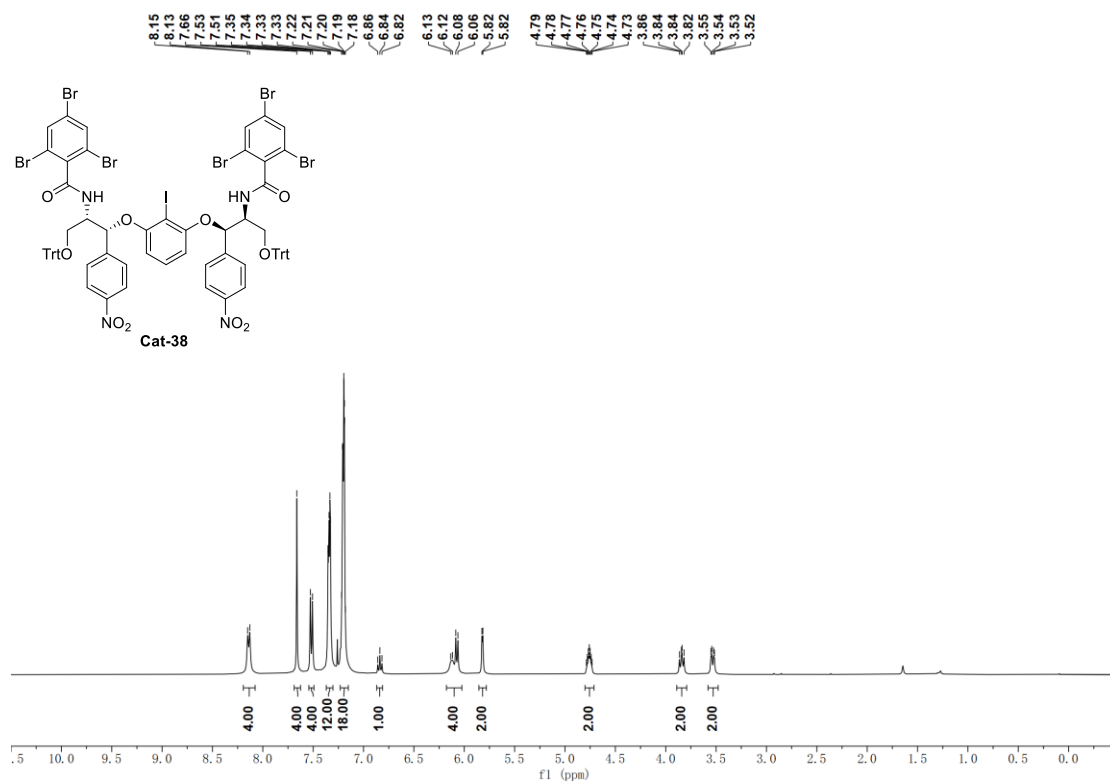

**Supplementary Figure 87.** <sup>1</sup>H NMR Spectrum of **Cat-38** (400 MHz, CDCl<sub>3</sub>)

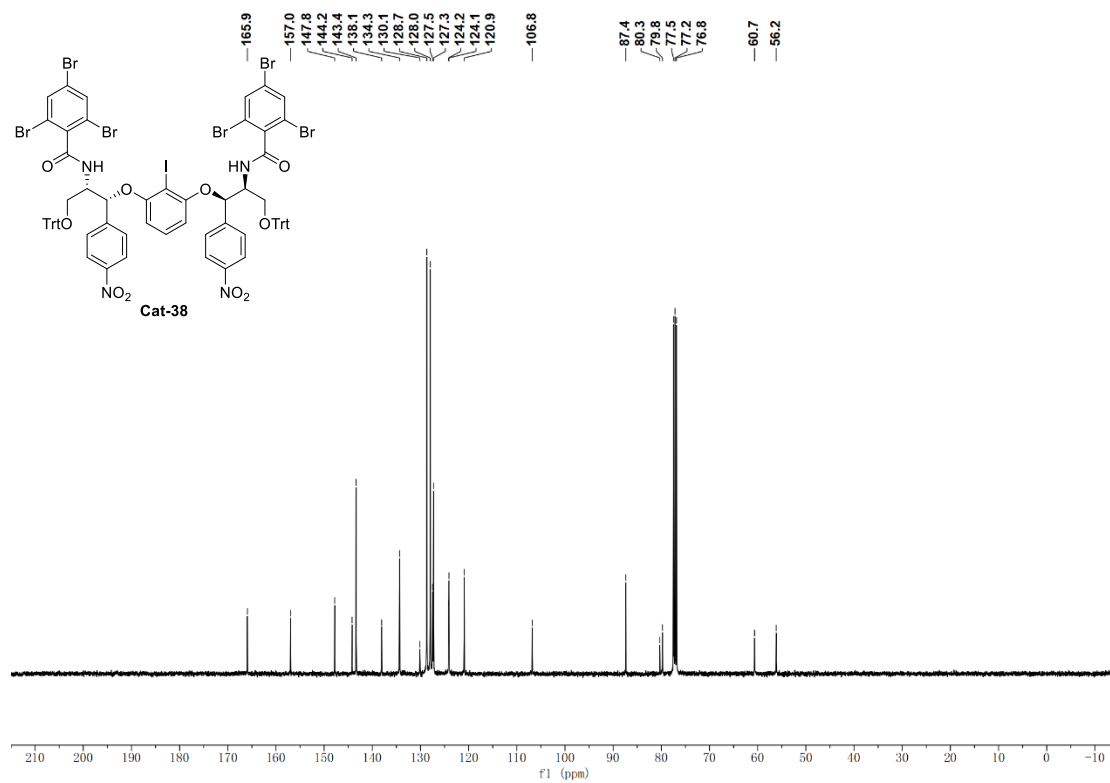

**Supplementary Figure 88.** <sup>13</sup>C NMR Spectrum of **Cat-38** (100 MHz, CDCl<sub>3</sub>)

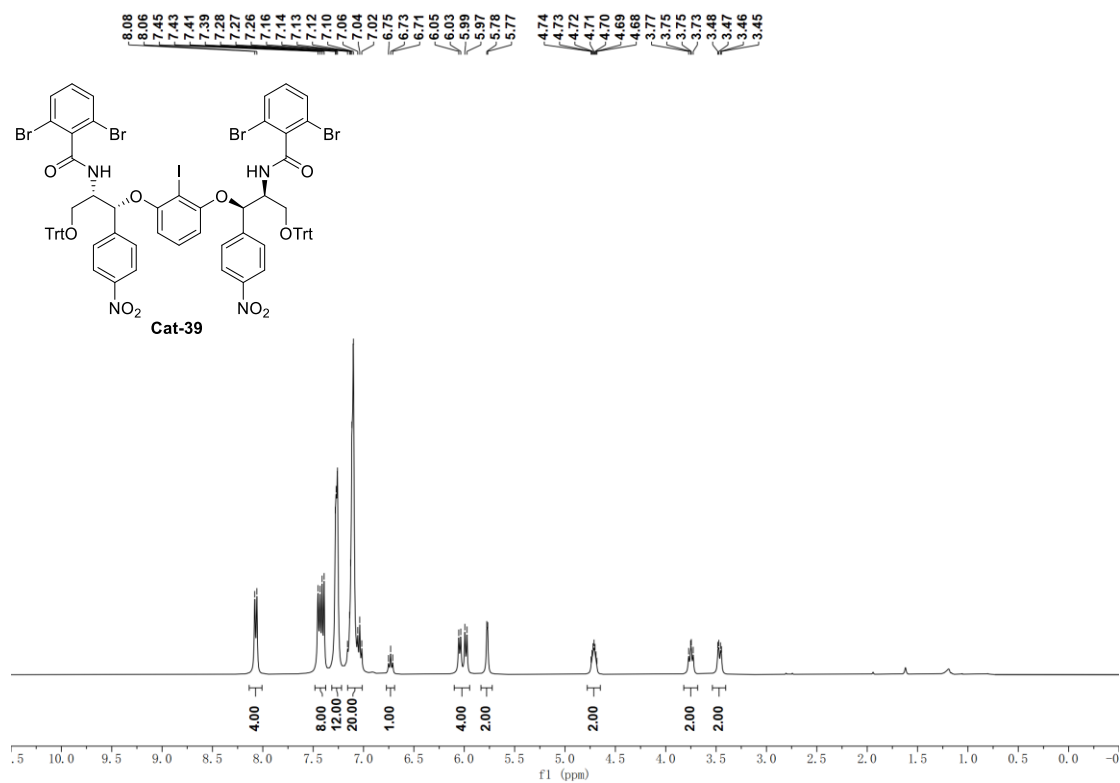

**Supplementary Figure 89.** <sup>1</sup>H NMR Spectrum of **Cat-39** (400 MHz, CDCl<sub>3</sub>)

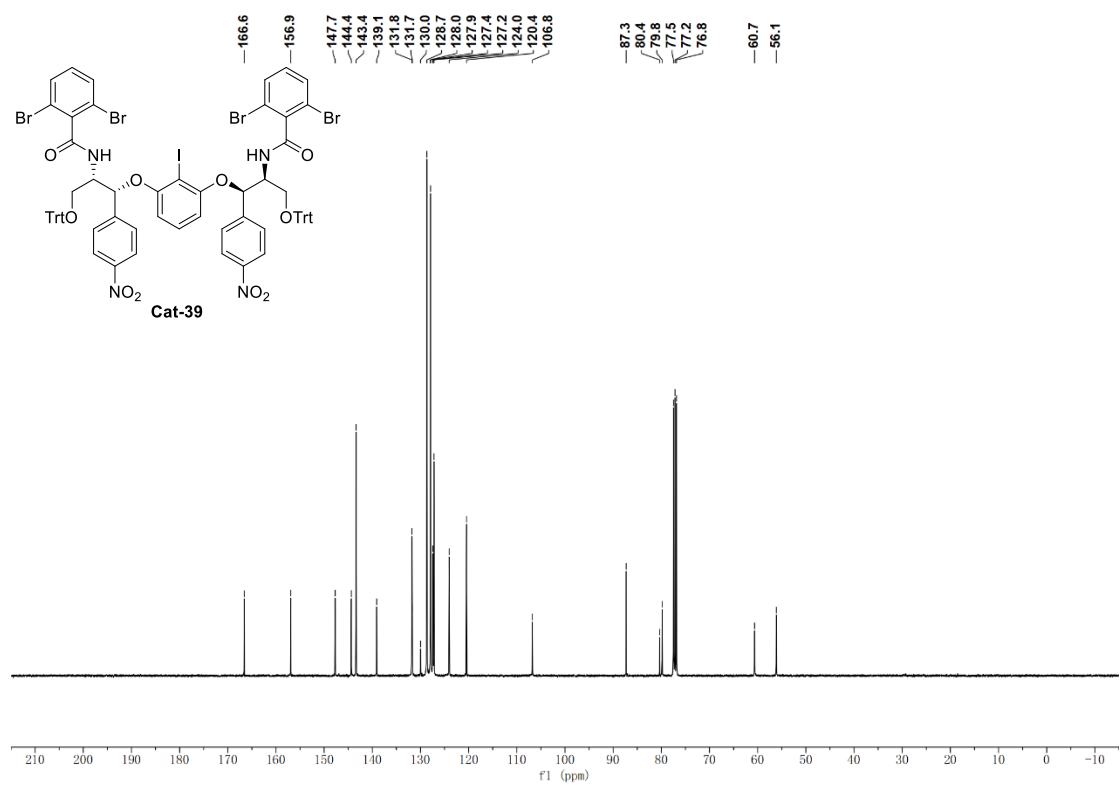

**Supplementary Figure 90.** <sup>13</sup>C NMR Spectrum of **Cat-39** (100 MHz, CDCl<sub>3</sub>)

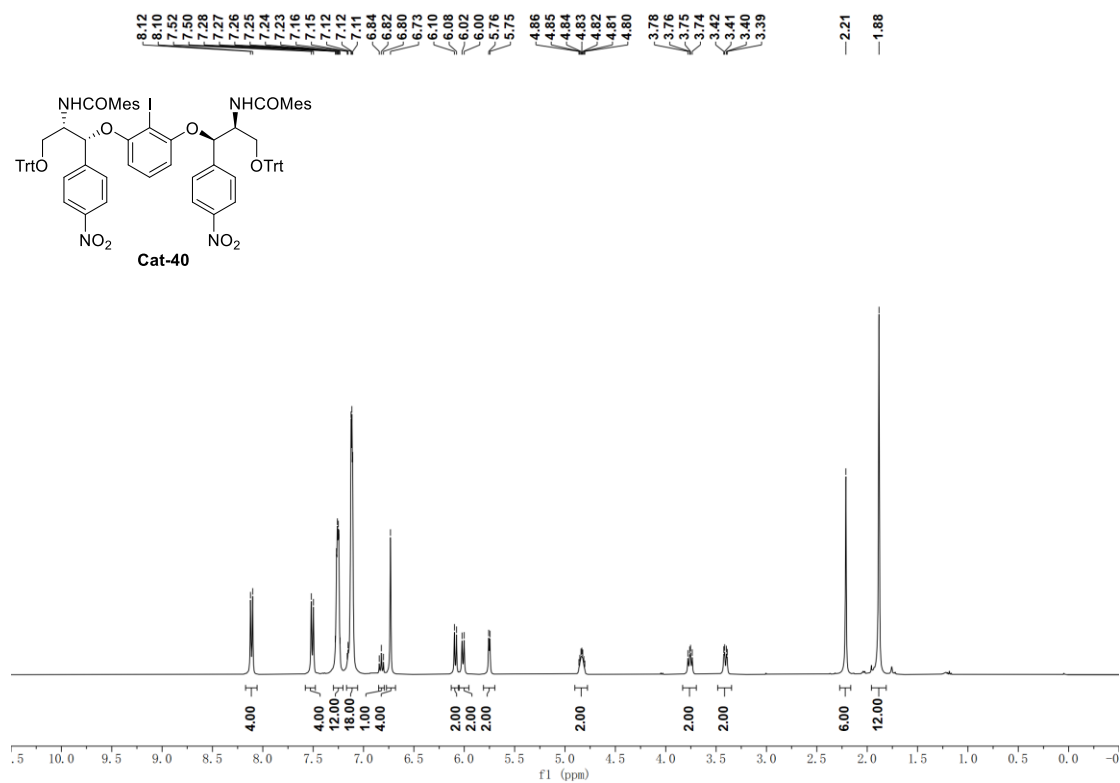

Supplementary Figure 91. <sup>1</sup>H NMR Spectrum of **Cat-40** (400 MHz, CDCl<sub>3</sub>)

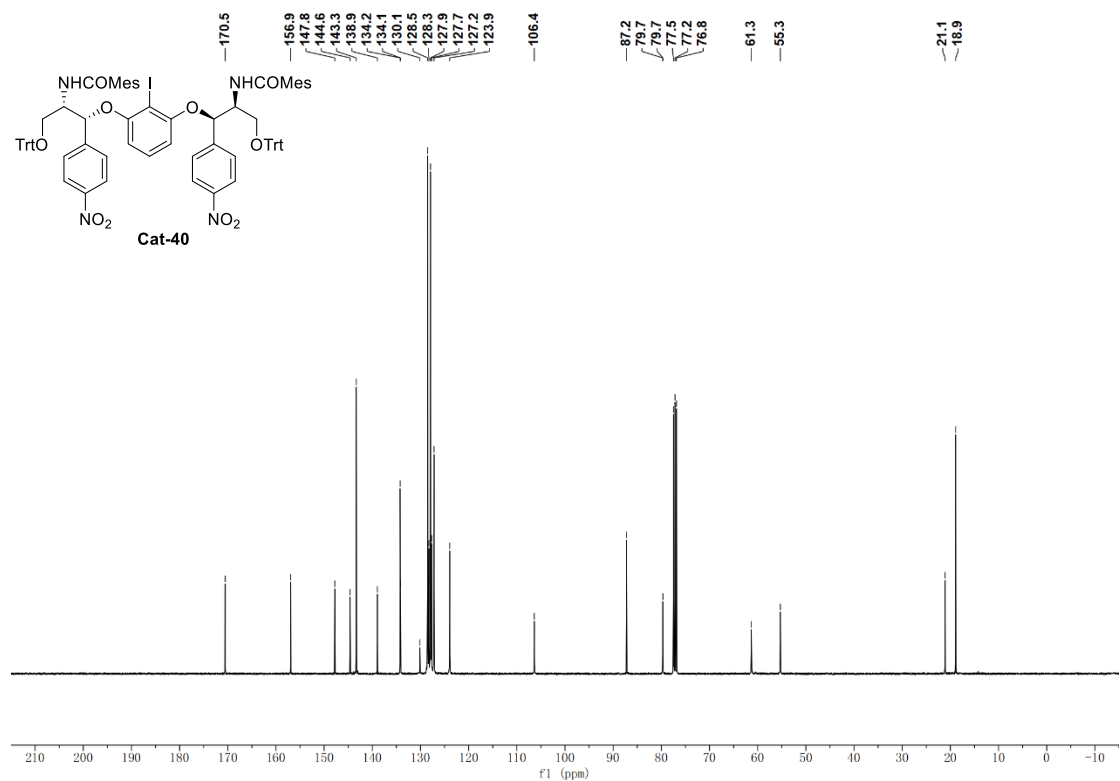

Supplementary Figure 92. <sup>13</sup>C NMR Spectrum of **Cat-40** (100 MHz, CDCl<sub>3</sub>)

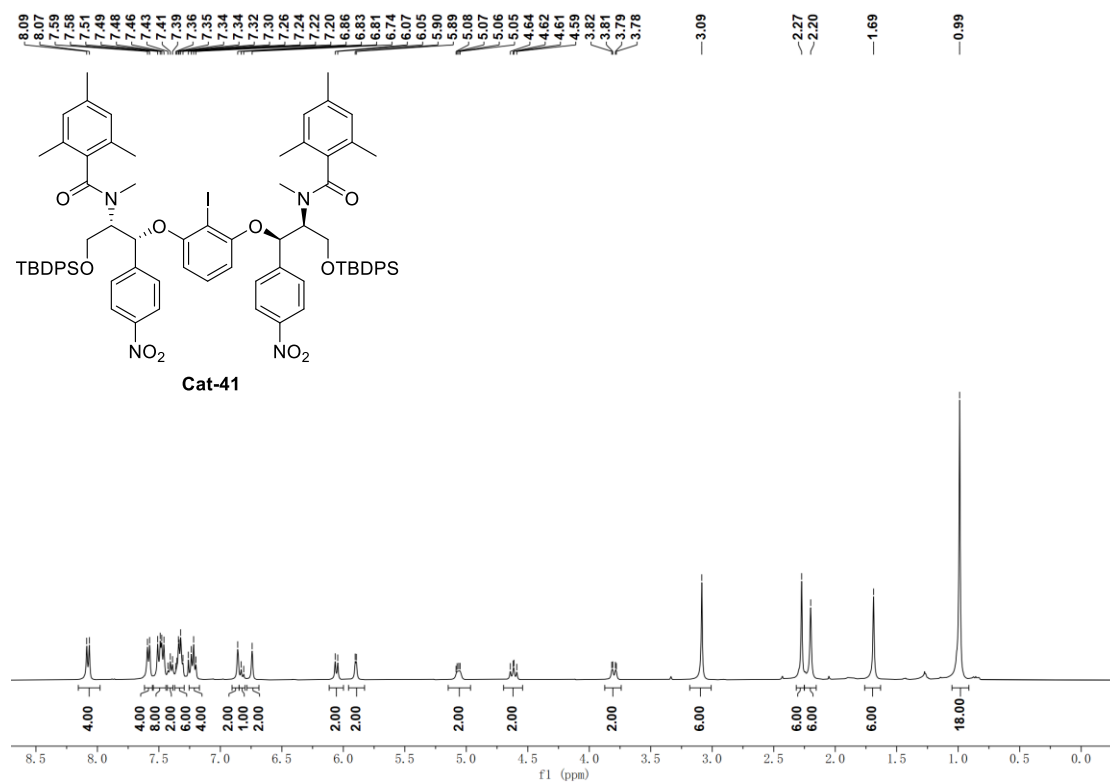

**Supplementary Figure 93.** <sup>1</sup>H NMR Spectrum of **Cat-41** (400 MHz, CDCl<sub>3</sub>)

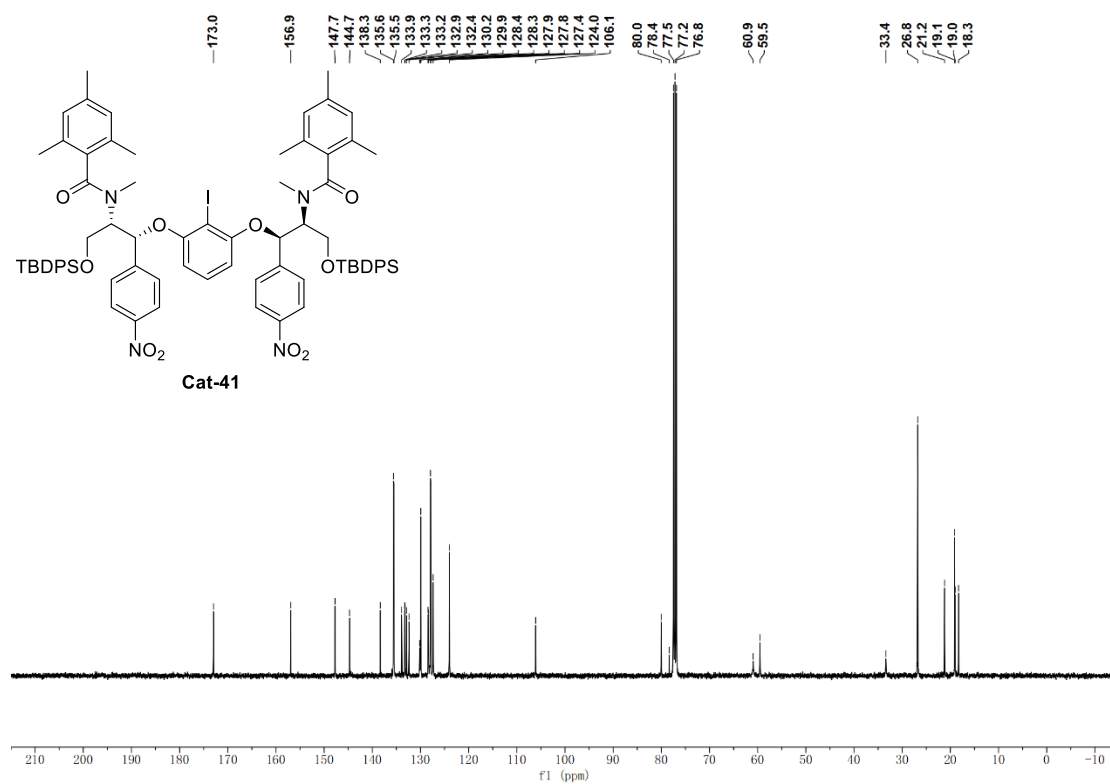

**Supplementary Figure 94.** <sup>13</sup>C NMR Spectrum of **Cat-41** (100 MHz, CDCl<sub>3</sub>)

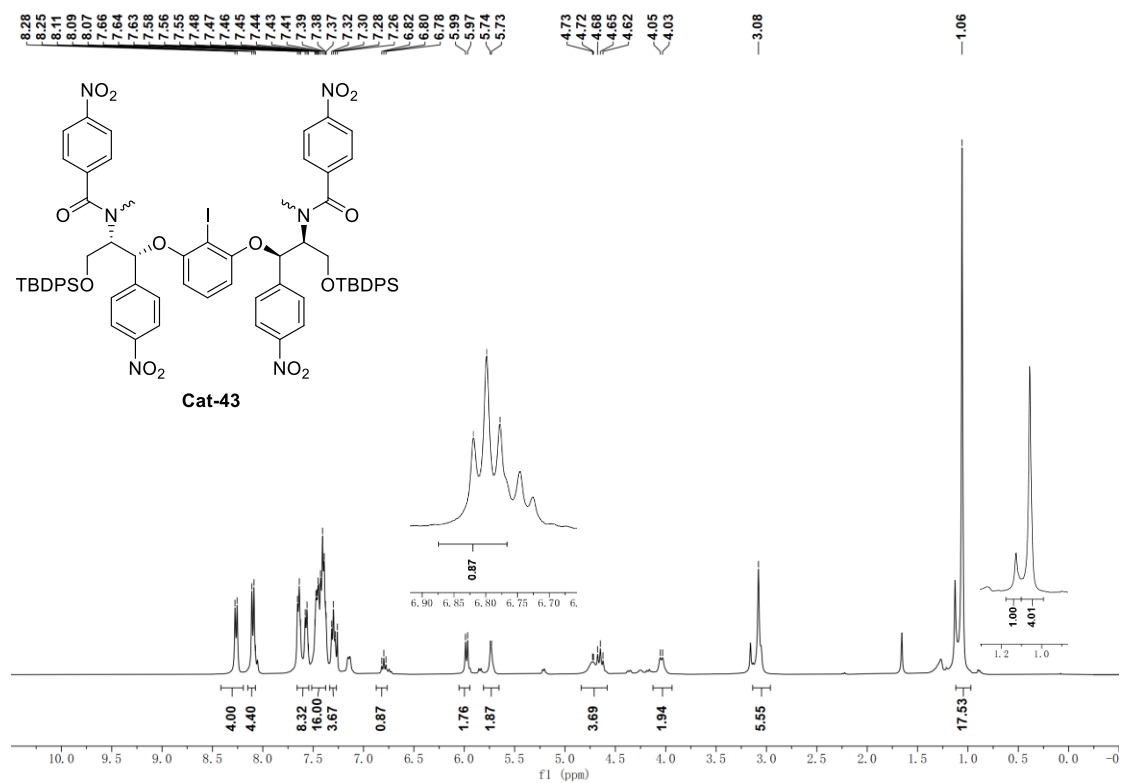

Supplementary Figure 95.  $^1\text{H}$  NMR Spectrum of Cat-43 (400 MHz,  $\text{CDCl}_3$ )

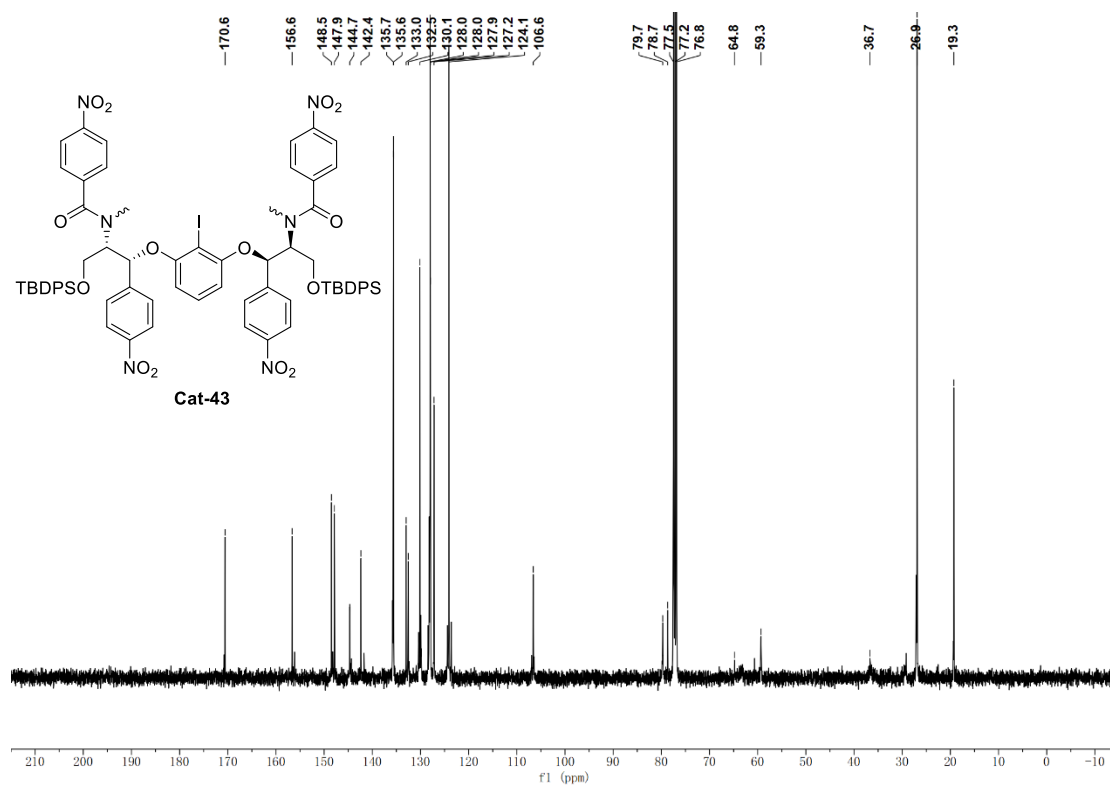

Supplementary Figure 96.  $^{13}\text{C}$  NMR Spectrum of Cat-43 (100 MHz,  $\text{CDCl}_3$ )

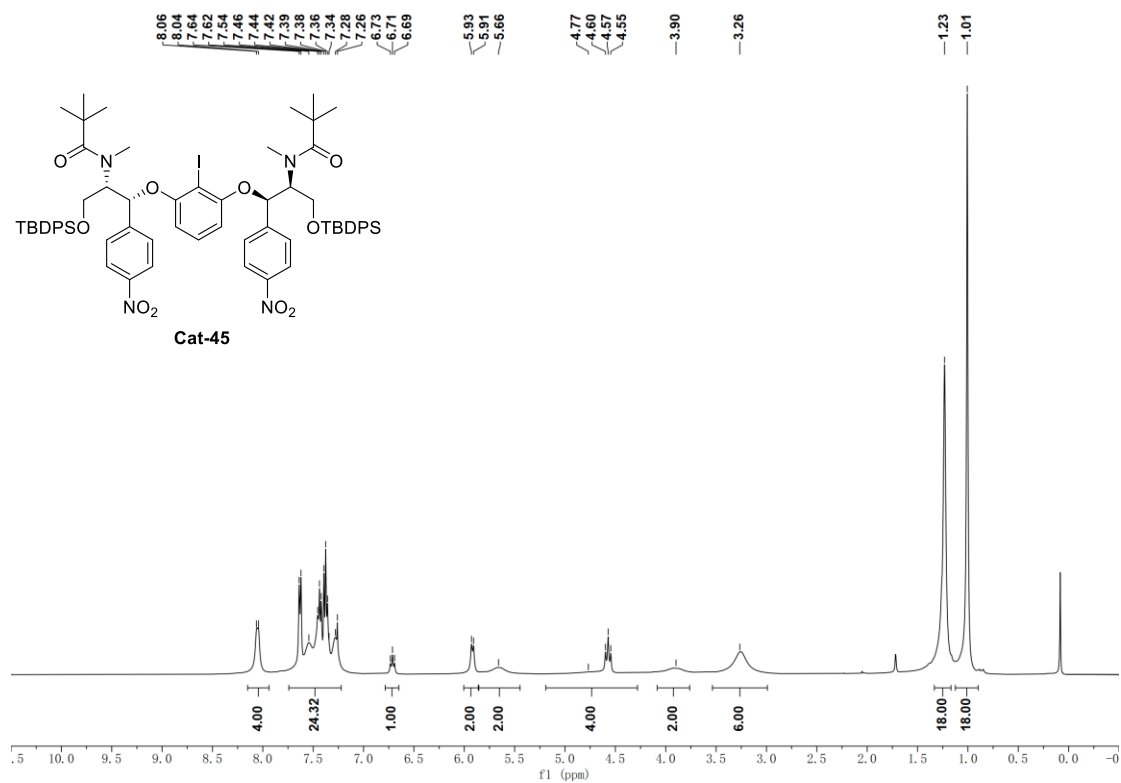

**Supplementary Figure 97.**  $^1\text{H}$  NMR Spectrum of **Cat-45** (400 MHz,  $\text{CDCl}_3$ )

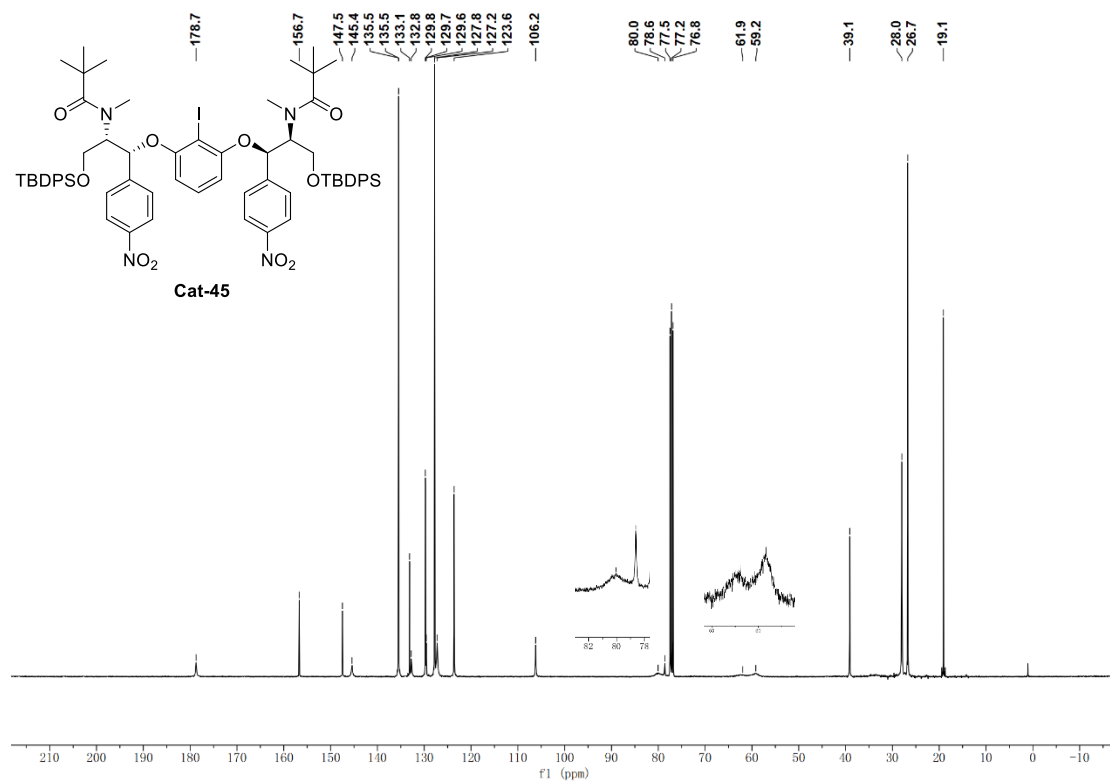

**Supplementary Figure 98.**  $^{13}\text{C}$  NMR Spectrum of **Cat-45** (100 MHz,  $\text{CDCl}_3$ )

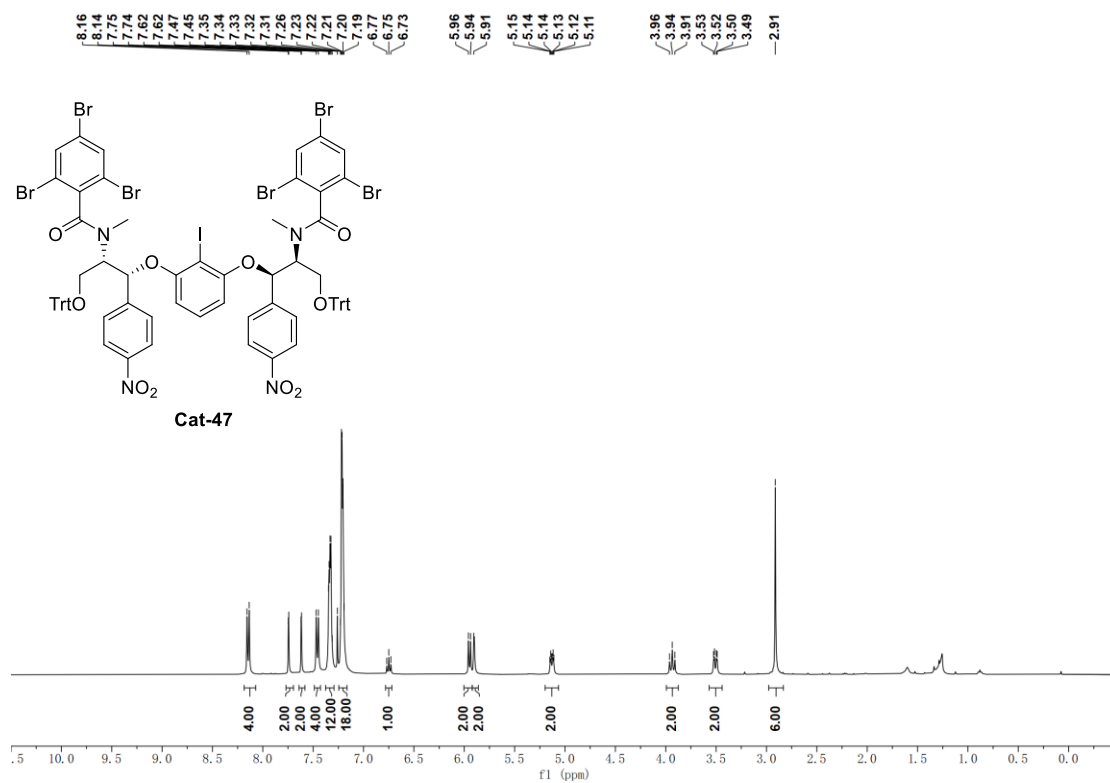

**Supplementary Figure 99.** <sup>1</sup>H NMR Spectrum of **Cat-47** (400 MHz, CDCl<sub>3</sub>)

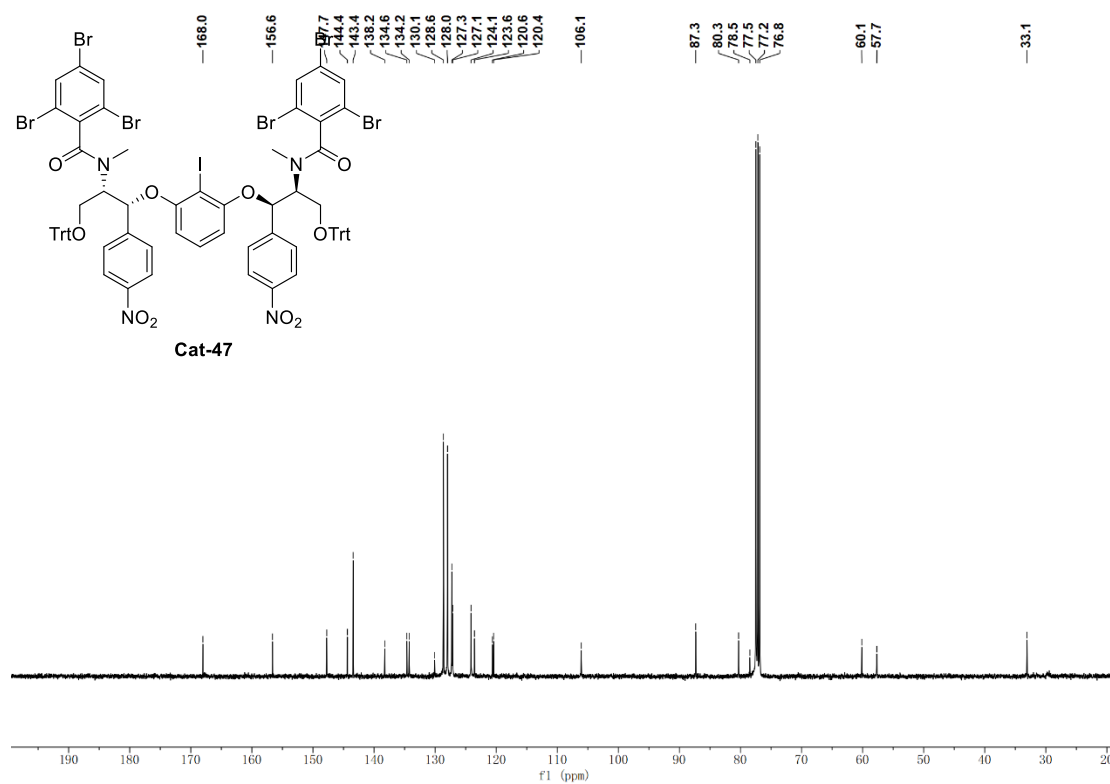

**Supplementary Figure 100.** <sup>13</sup>C NMR Spectrum of **Cat-47** (100 MHz, CDCl<sub>3</sub>)

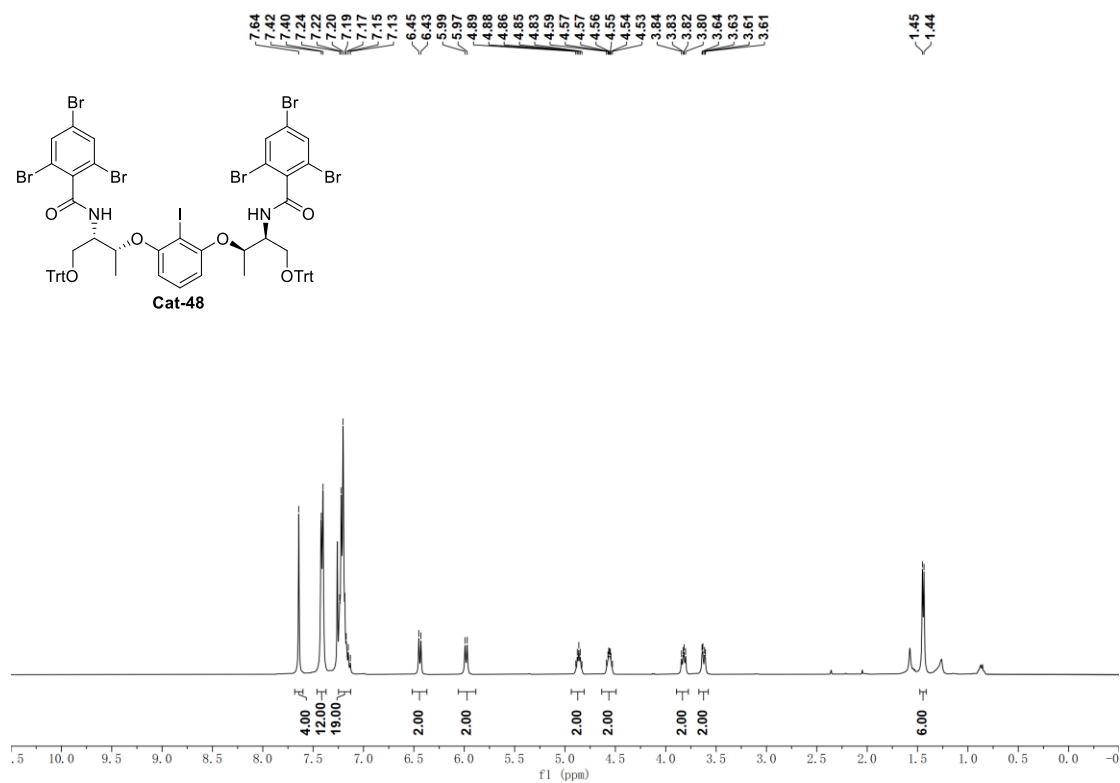

**Supplementary Figure 101.**  $^1\text{H}$  NMR Spectrum of **Cat-48** (400 MHz,  $\text{CDCl}_3$ )

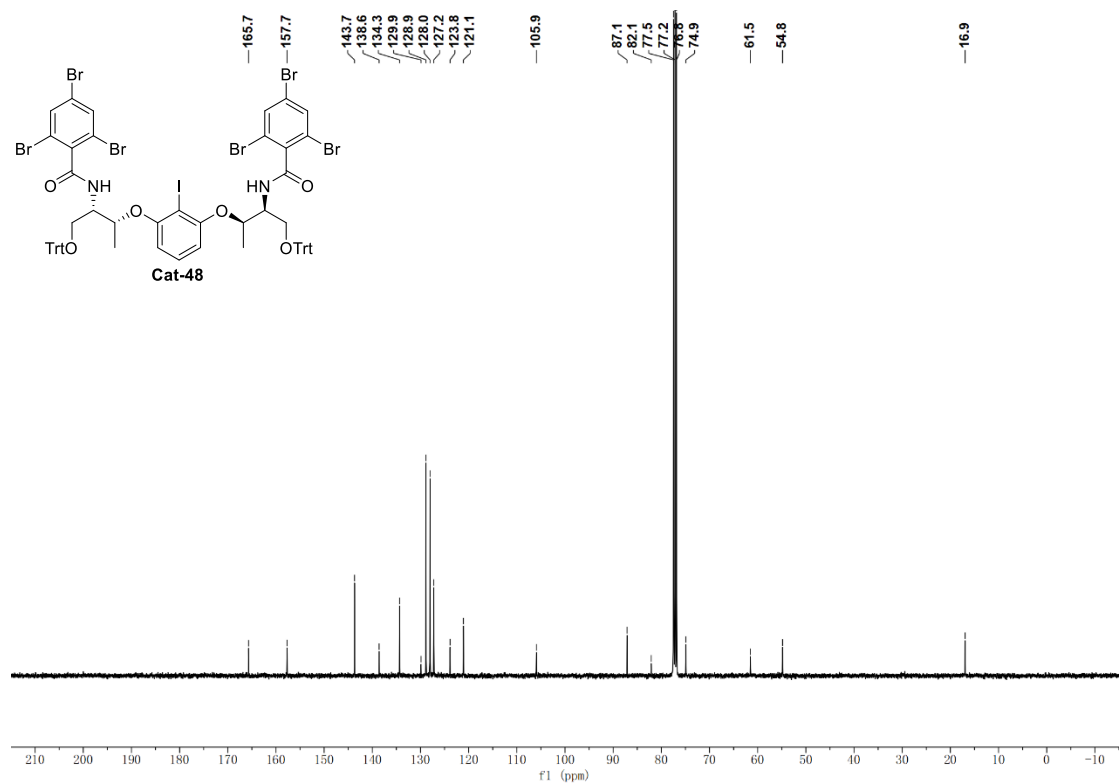

**Supplementary Figure 102.**  $^{13}\text{C}$  NMR Spectrum of **Cat-48** (100 MHz,  $\text{CDCl}_3$ )



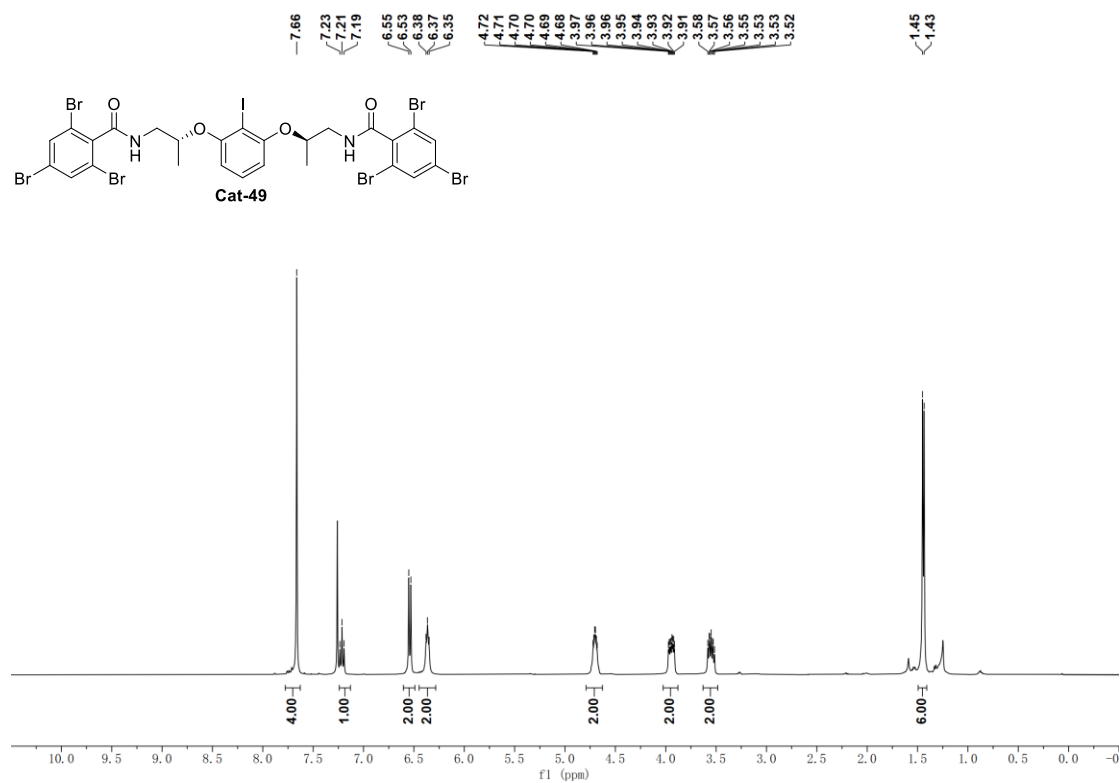

**Supplementary Figure 103.**  $^1\text{H}$  NMR Spectrum of **Cat-49** (400 MHz,  $\text{CDCl}_3$ )

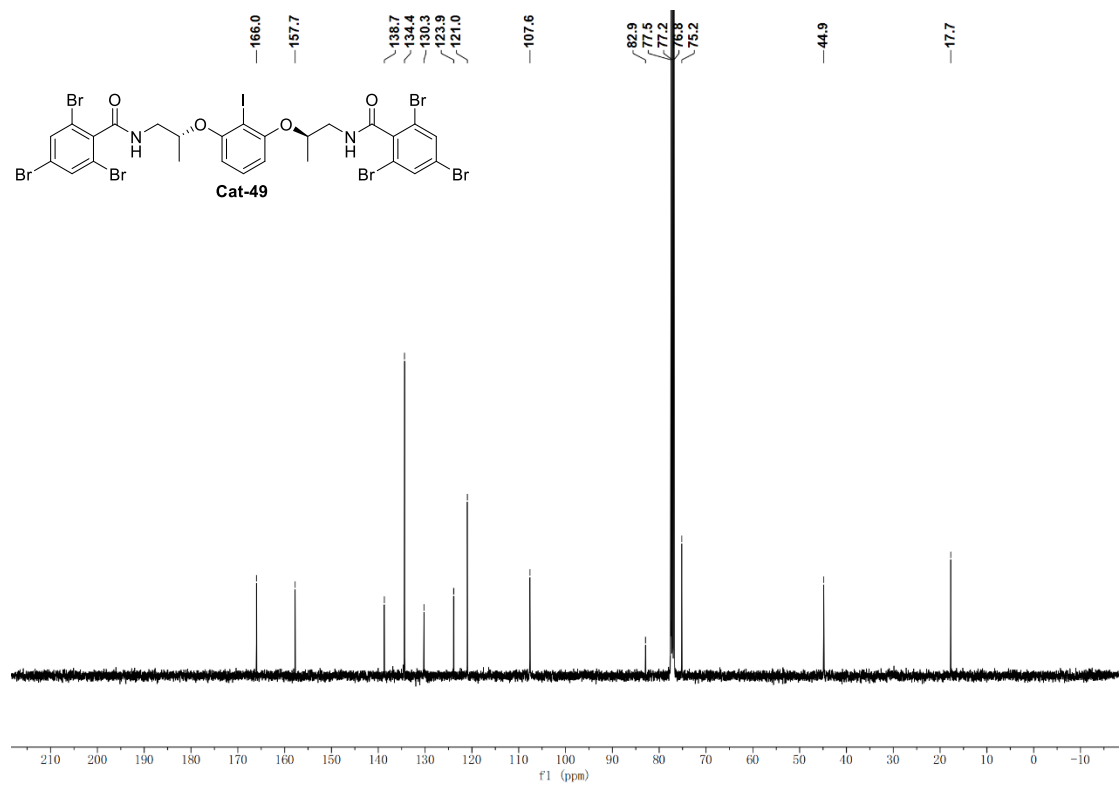

**Supplementary Figure 104.**  $^{13}\text{C}$  NMR Spectrum of **Cat-49** (100 MHz,  $\text{CDCl}_3$ )

## 12.2 NMR spectra of product

### 12.2.1 Spectrum of enantioselective oxidative dearomatization

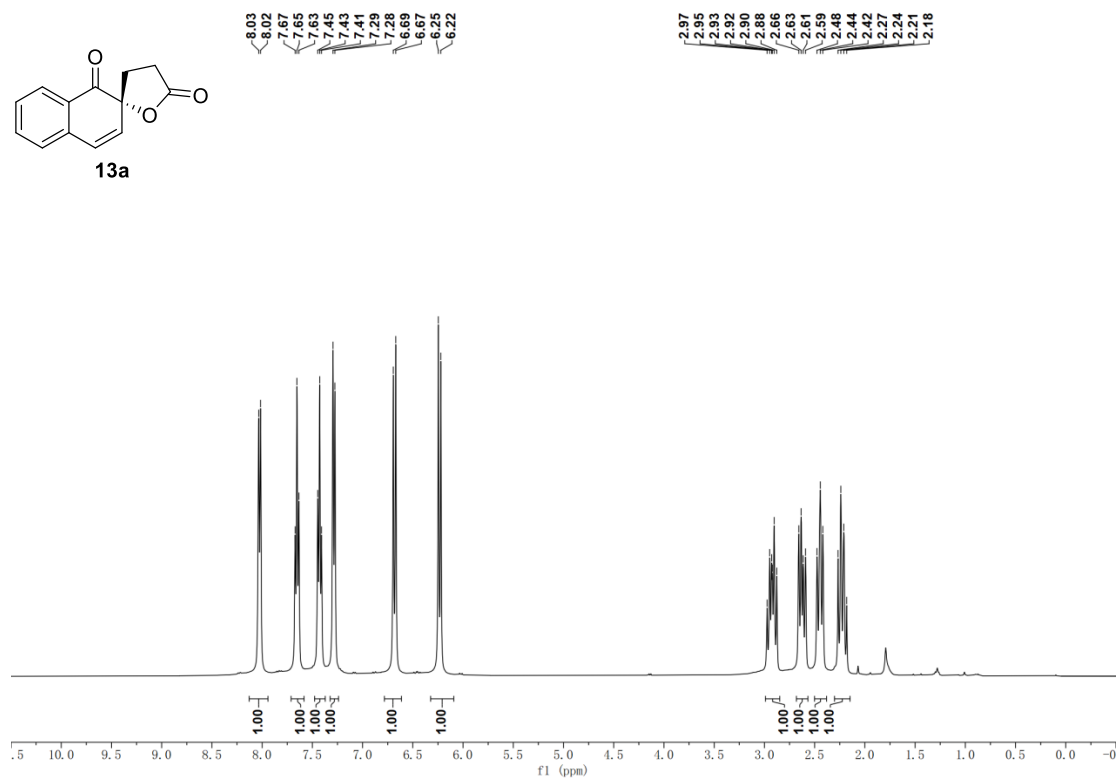

Supplementary Figure 105.  $^1\text{H}$  NMR Spectrum of **13a** (400 MHz,  $\text{CDCl}_3$ )

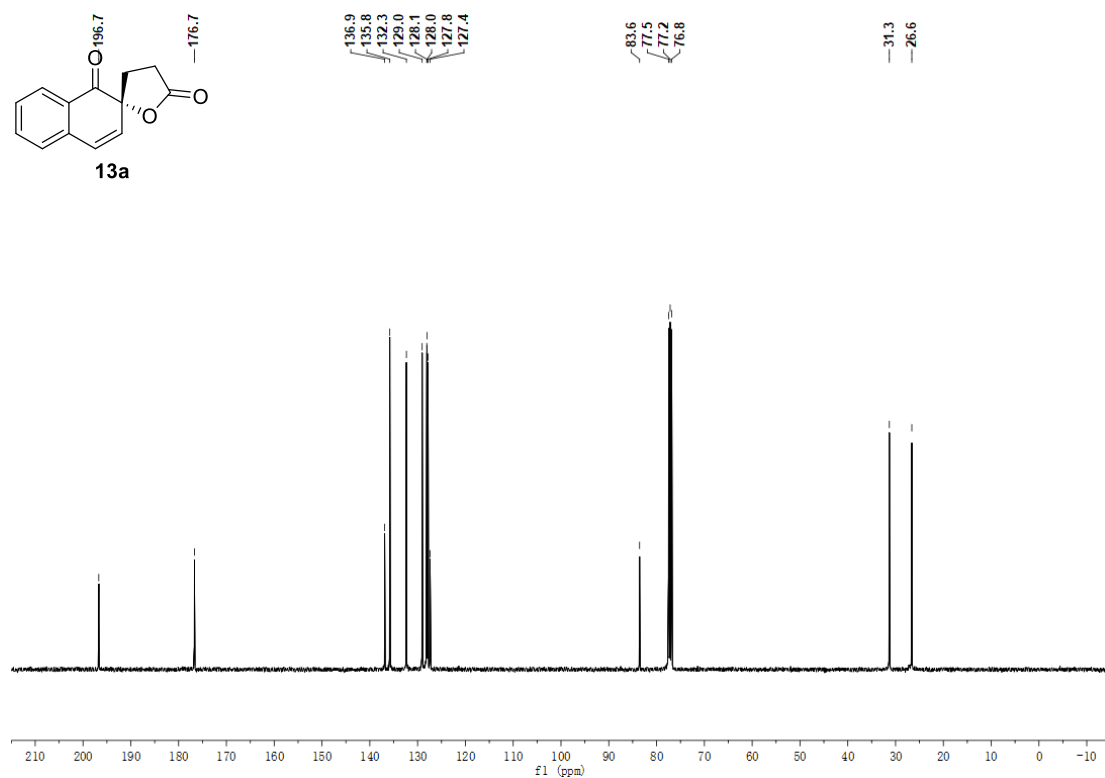

Supplementary Figure 106.  $^{13}\text{C}$  NMR Spectrum of **13a** (100 MHz,  $\text{CDCl}_3$ )

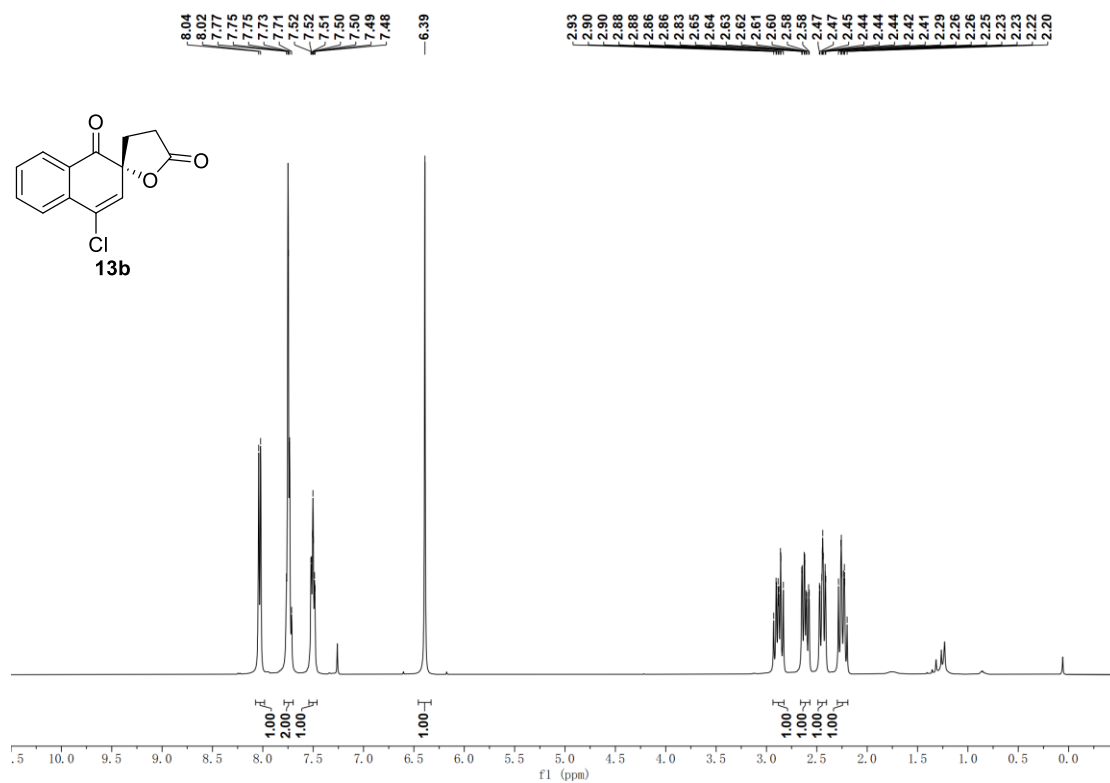

**Supplementary Figure 107.** <sup>1</sup>H NMR Spectrum of **13b** (400 MHz, CDCl<sub>3</sub>)

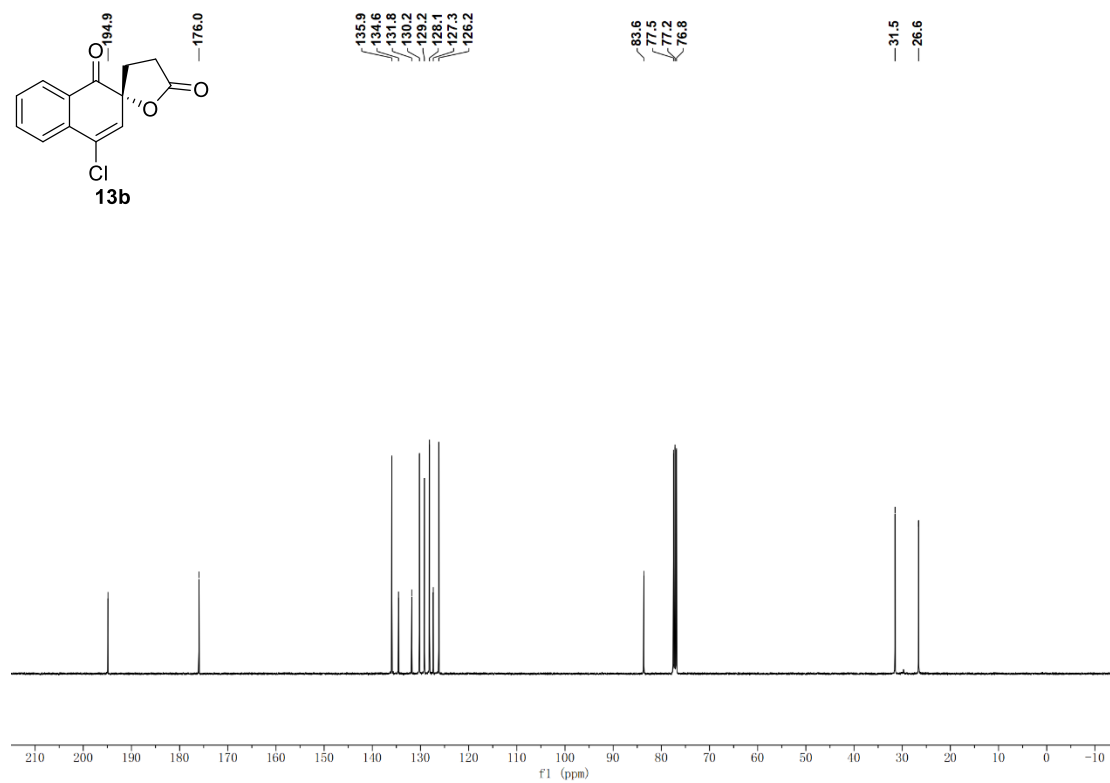

**Supplementary Figure 108.** <sup>13</sup>C NMR Spectrum of **13b** (100 MHz, CDCl<sub>3</sub>)

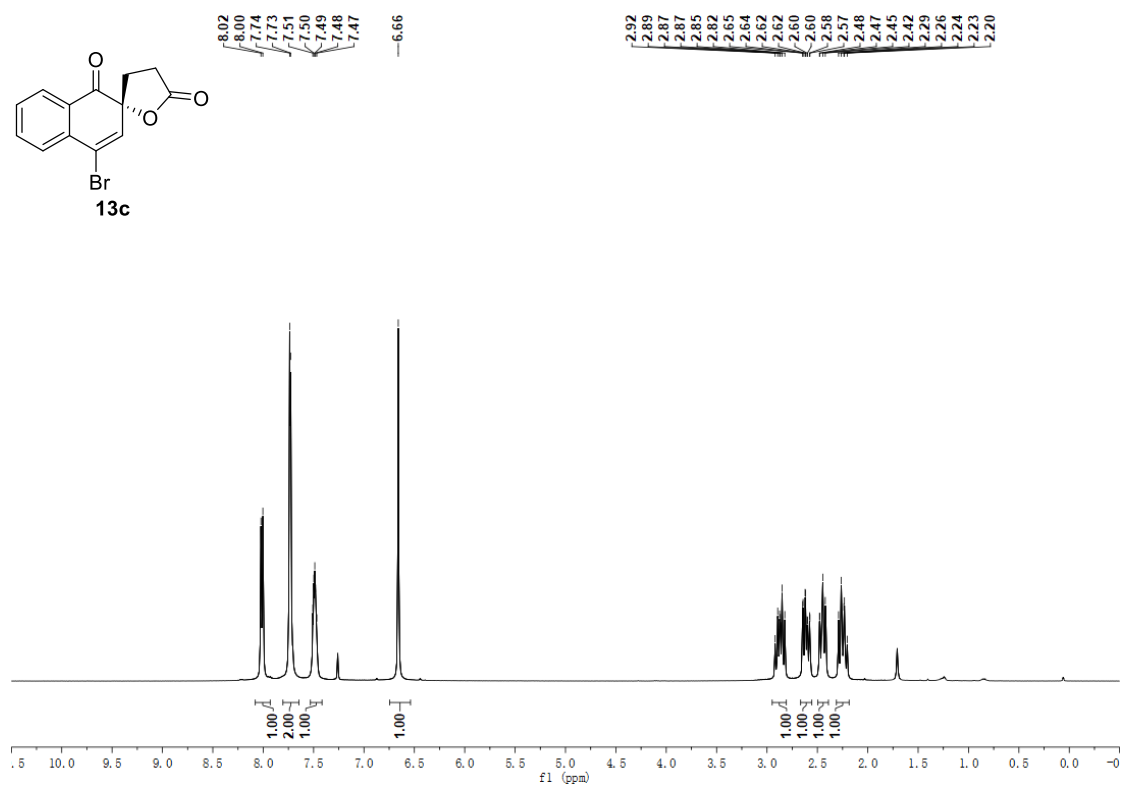

**Supplementary Figure 109.** <sup>1</sup>H NMR Spectrum of **13c** (400 MHz, CDCl<sub>3</sub>)

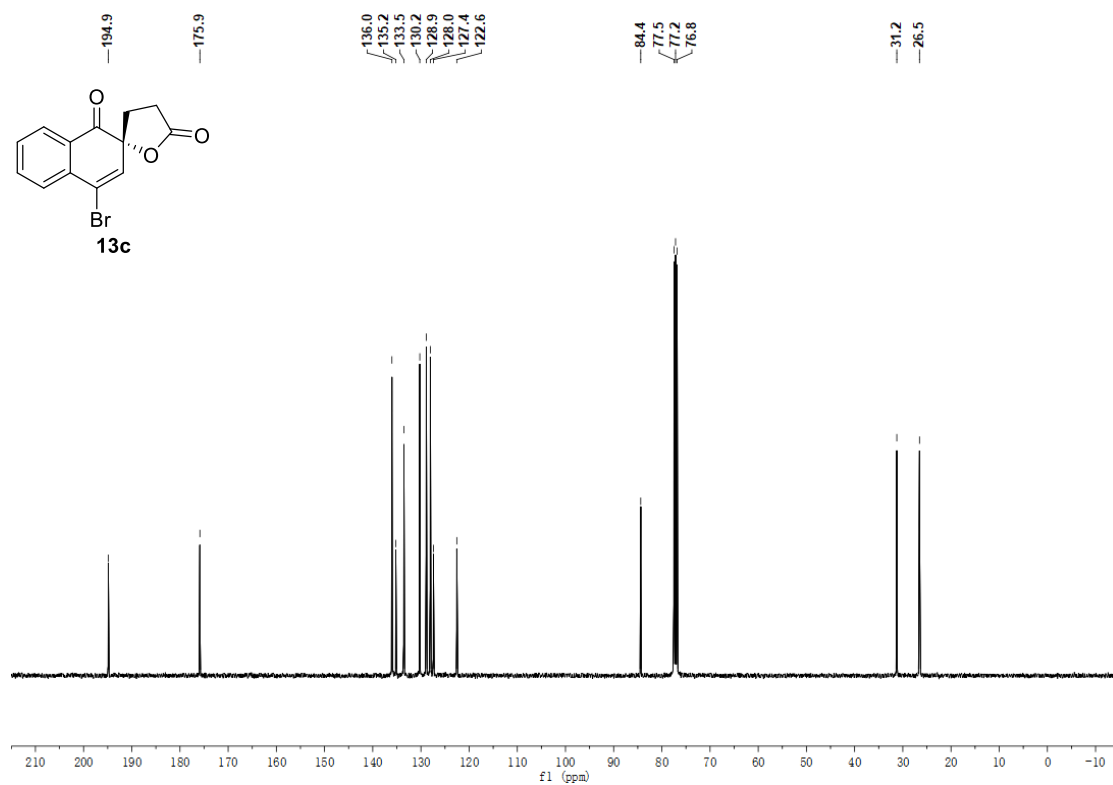

**Supplementary Figure 110.** <sup>13</sup>C NMR Spectrum of **13c** (100 MHz, CDCl<sub>3</sub>)

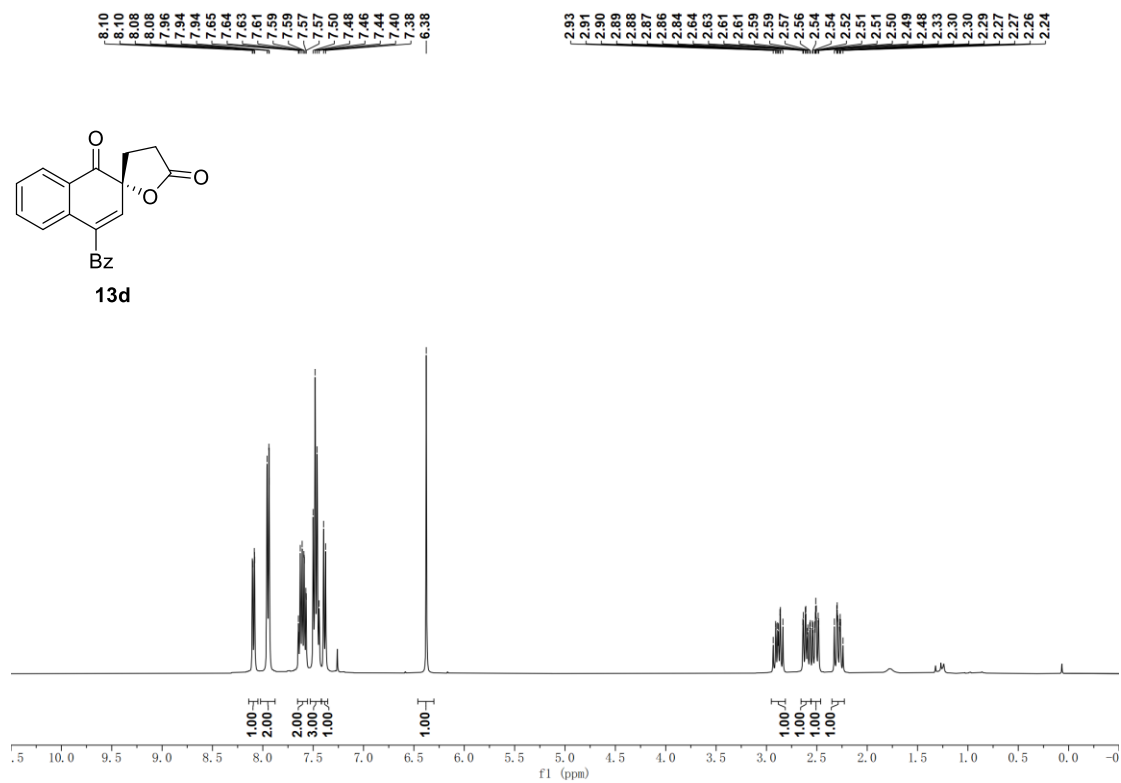

**Supplementary Figure 111.** <sup>1</sup>H NMR Spectrum of **13d** (400 MHz, CDCl<sub>3</sub>)

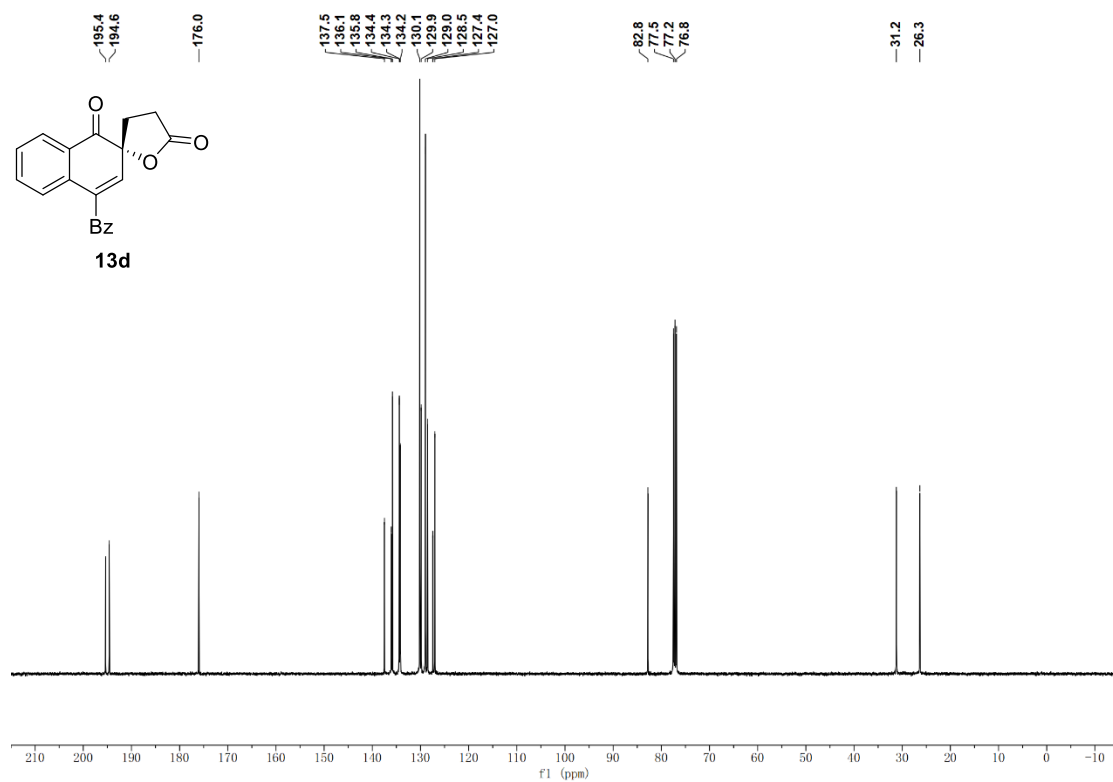

**Supplementary Figure 112.** <sup>13</sup>C NMR Spectrum of **13d** (100 MHz, CDCl<sub>3</sub>)

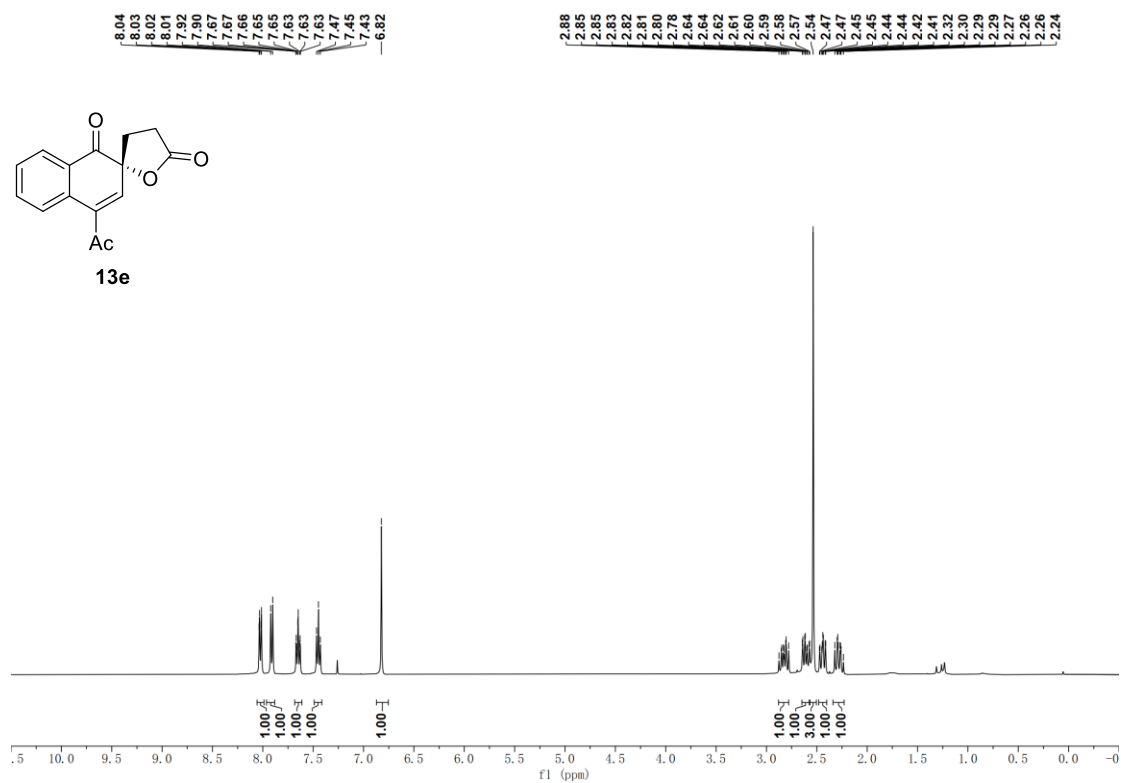

Supplementary Figure 113. <sup>1</sup>H NMR Spectrum of **13e** (400 MHz, CDCl<sub>3</sub>)

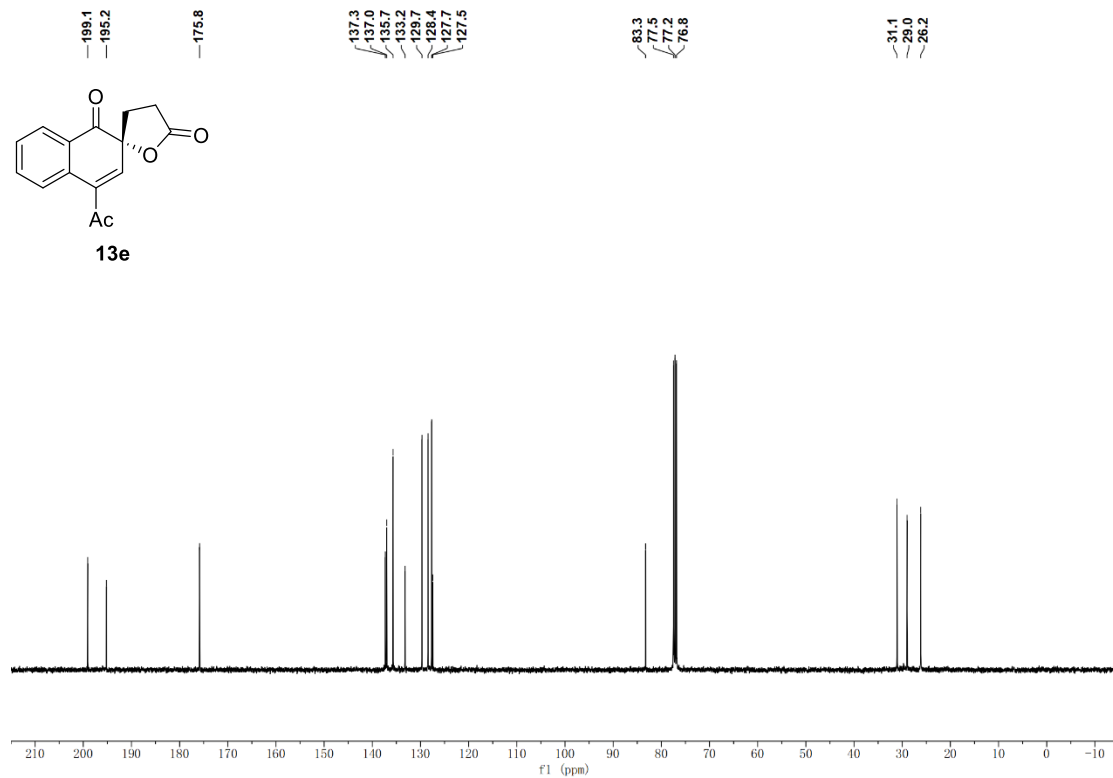

Supplementary Figure 114. <sup>13</sup>C NMR Spectrum of **13e** (100 MHz, CDCl<sub>3</sub>)

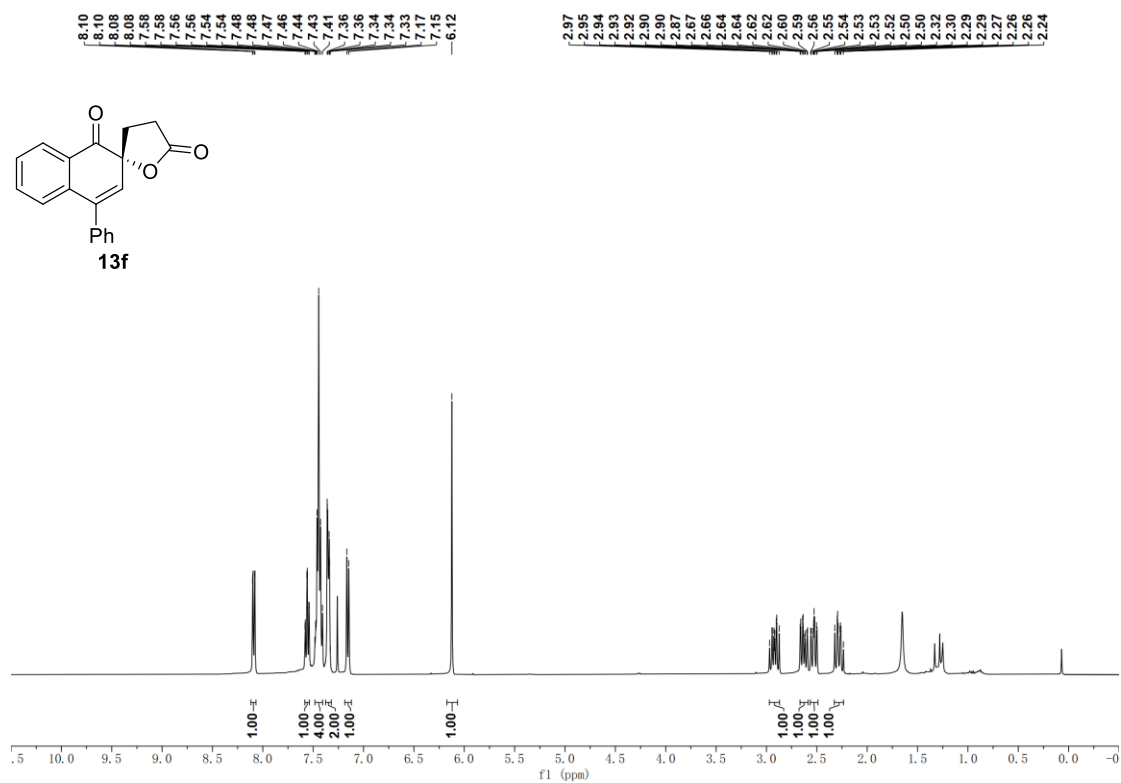

Supplementary Figure 115. <sup>1</sup>H NMR Spectrum of **13f** (400 MHz, CDCl<sub>3</sub>)

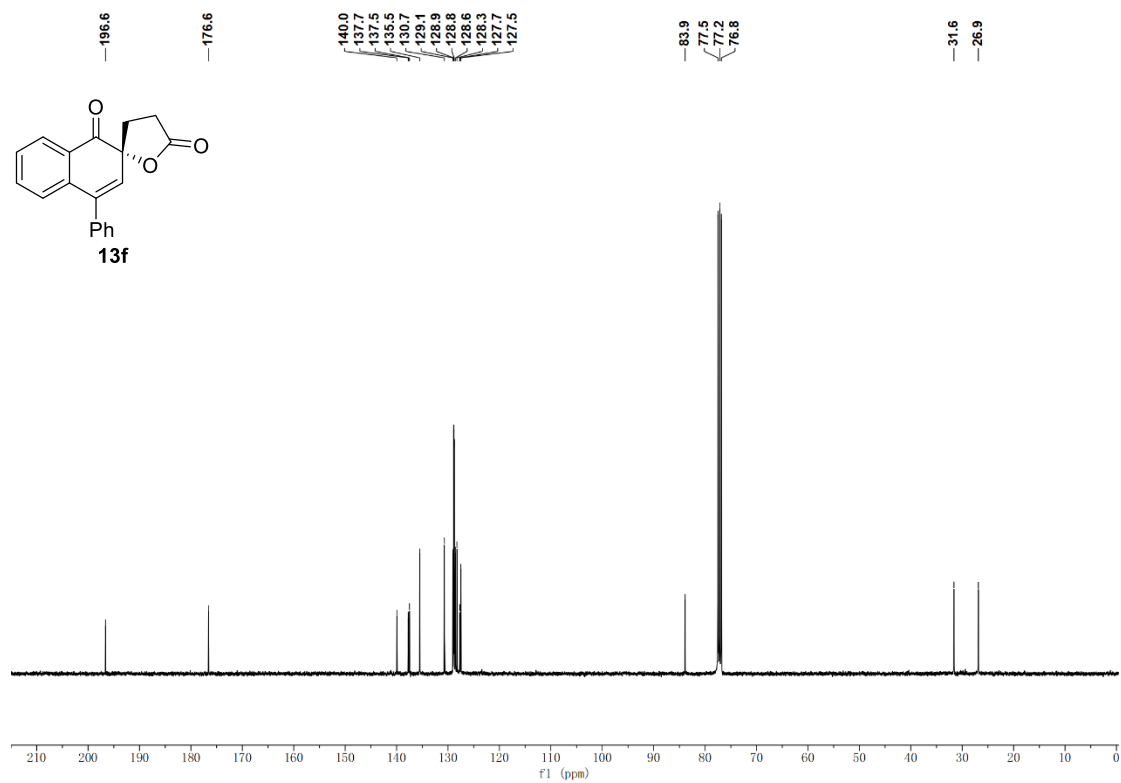

Supplementary Figure 116. <sup>13</sup>C NMR Spectrum of **13f** (100 MHz, CDCl<sub>3</sub>)

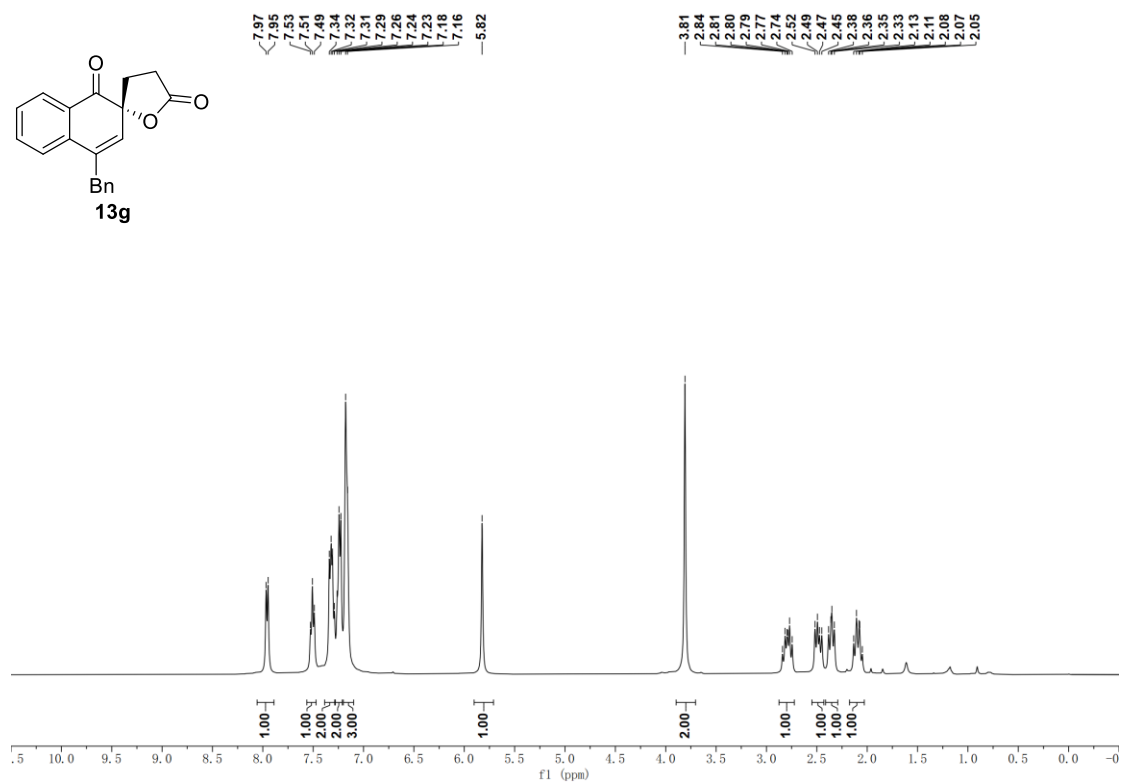

Supplementary Figure 117.  $^1\text{H}$  NMR Spectrum of **13g** (400 MHz,  $\text{CDCl}_3$ )

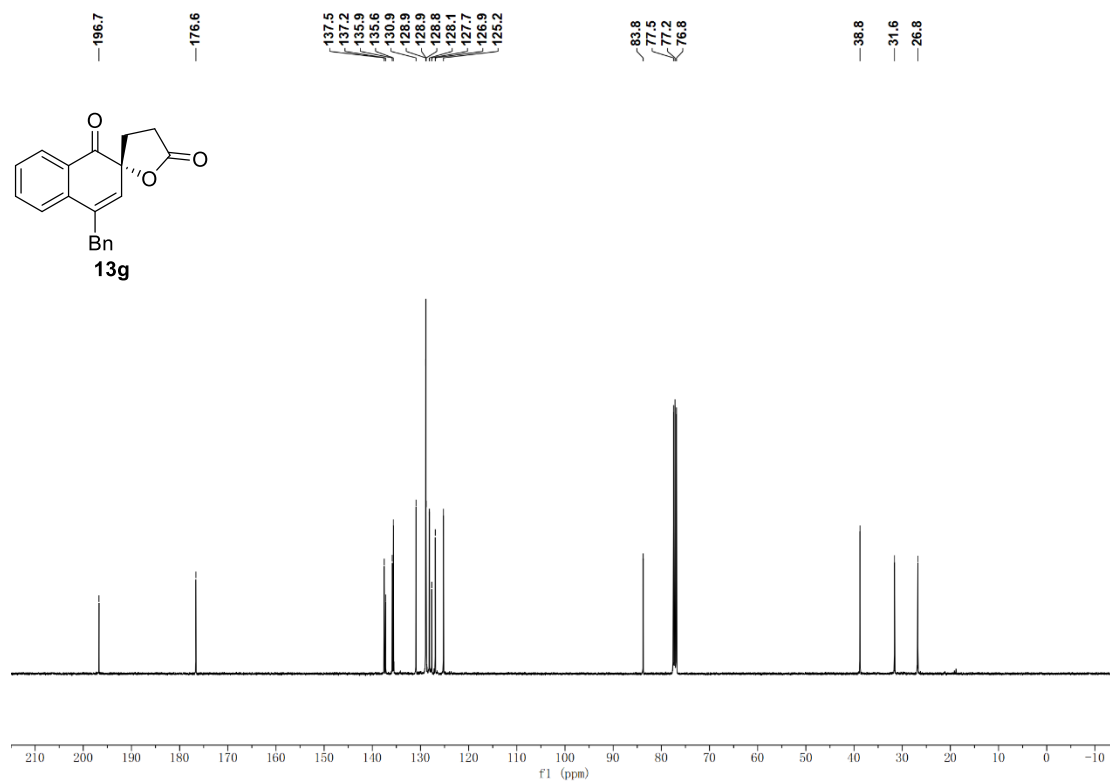

Supplementary Figure 118.  $^{13}\text{C}$  NMR Spectrum of **13g** (100 MHz,  $\text{CDCl}_3$ )



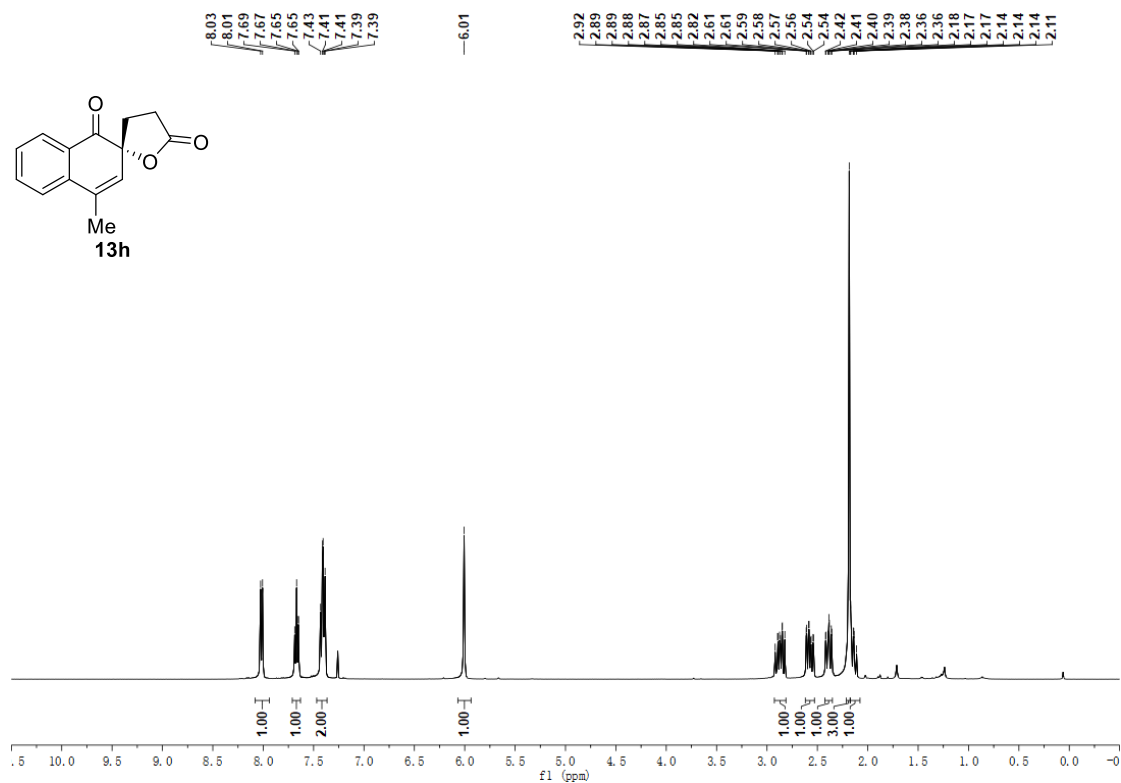

**Supplementary Figure 119.** <sup>1</sup>H NMR Spectrum of **13h** (400 MHz, CDCl<sub>3</sub>)

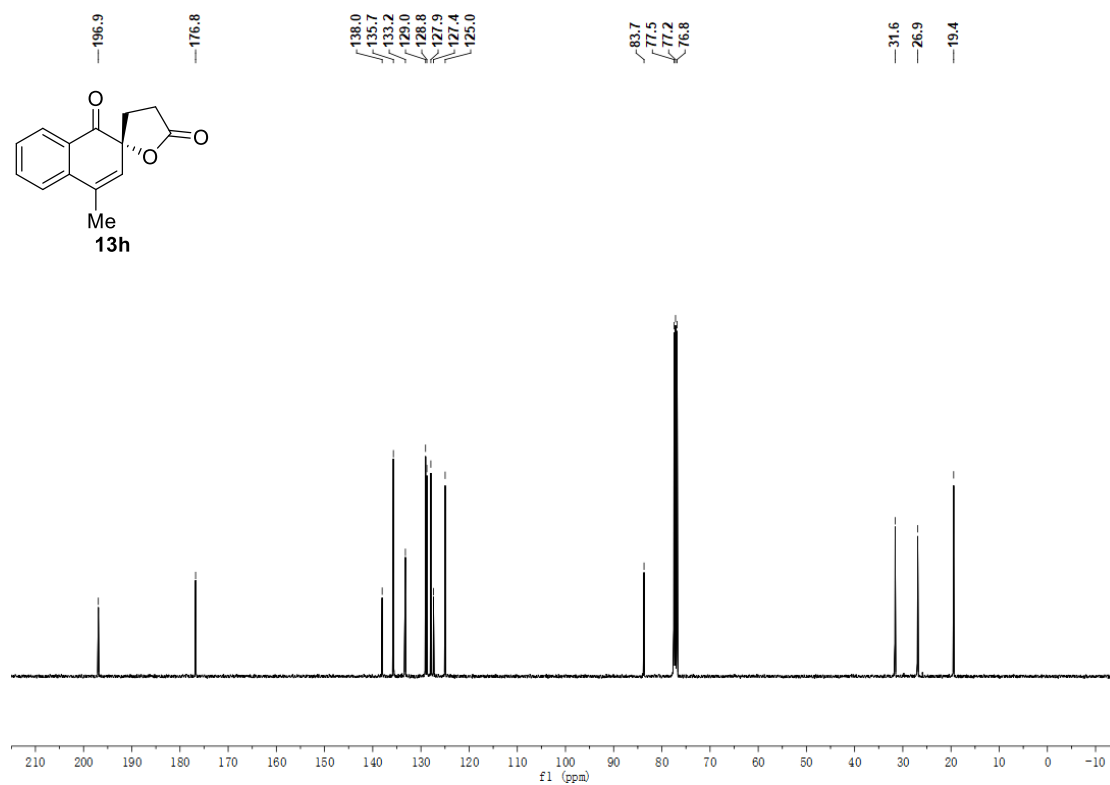

**Supplementary Figure 120.** <sup>13</sup>C NMR Spectrum of **13h** (100 MHz, CDCl<sub>3</sub>)

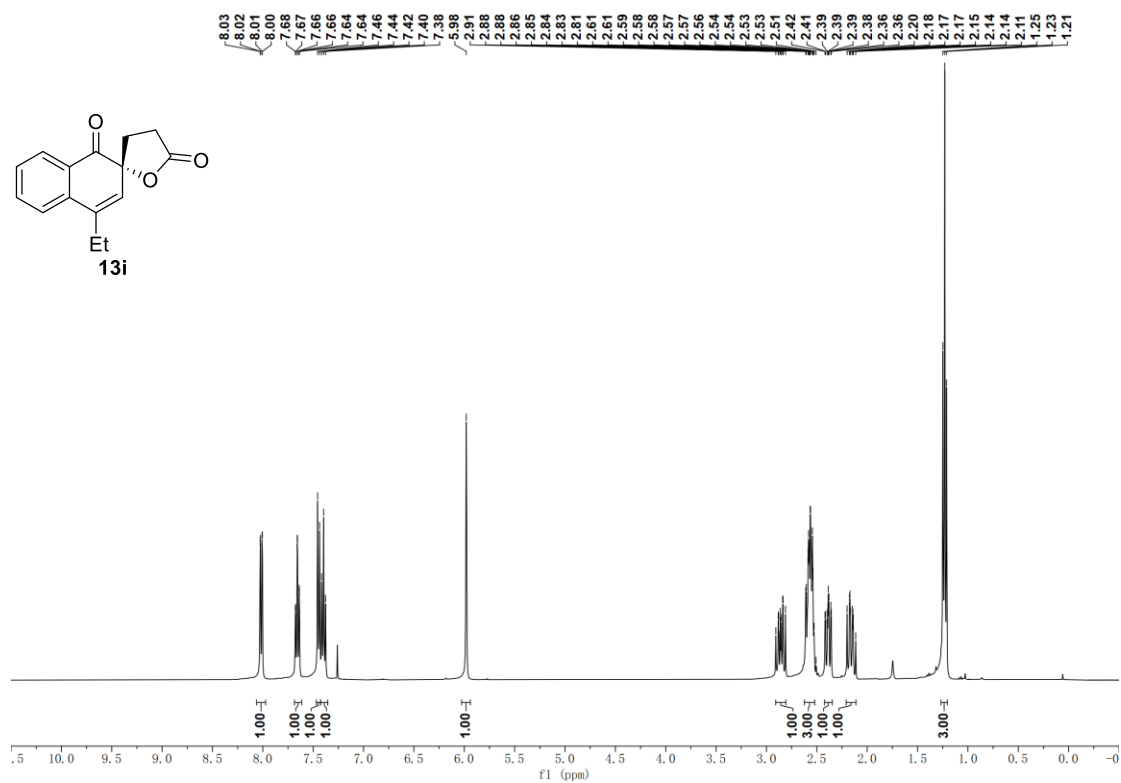

**Supplementary Figure 121.** <sup>1</sup>H NMR Spectrum of **13i** (400 MHz, CDCl<sub>3</sub>)

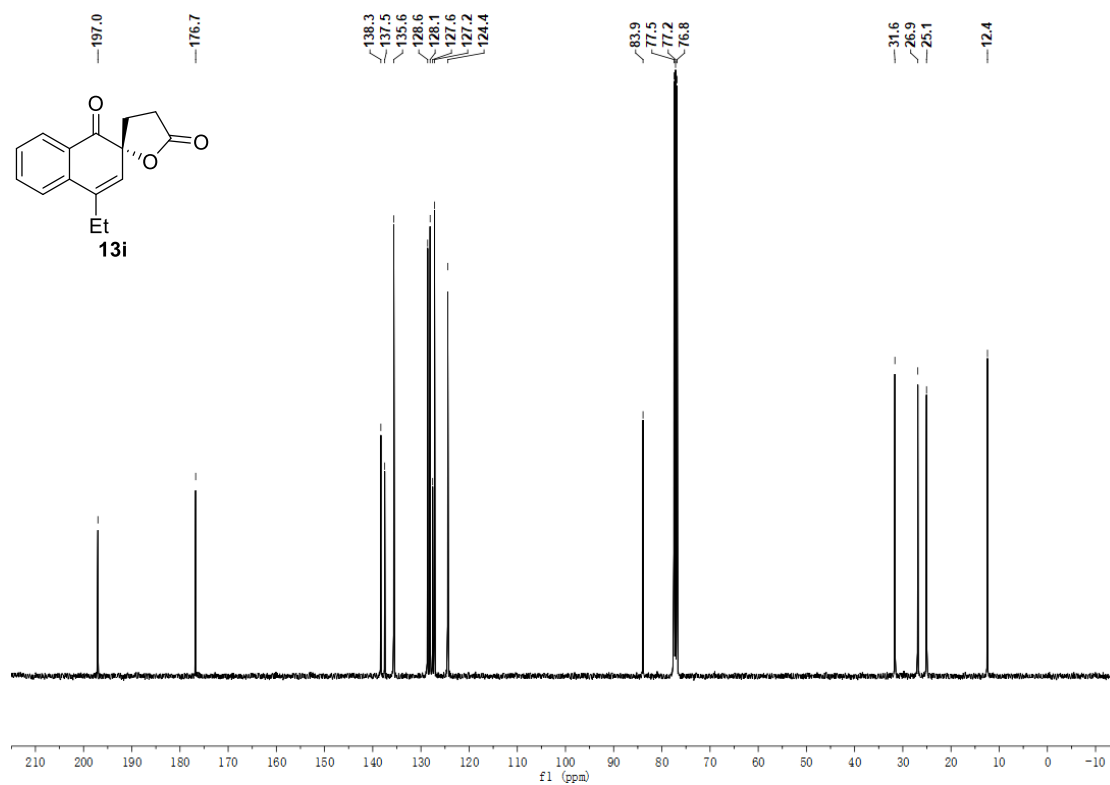

**Supplementary Figure 122.** <sup>13</sup>C NMR Spectrum of **13i** (100 MHz, CDCl<sub>3</sub>)

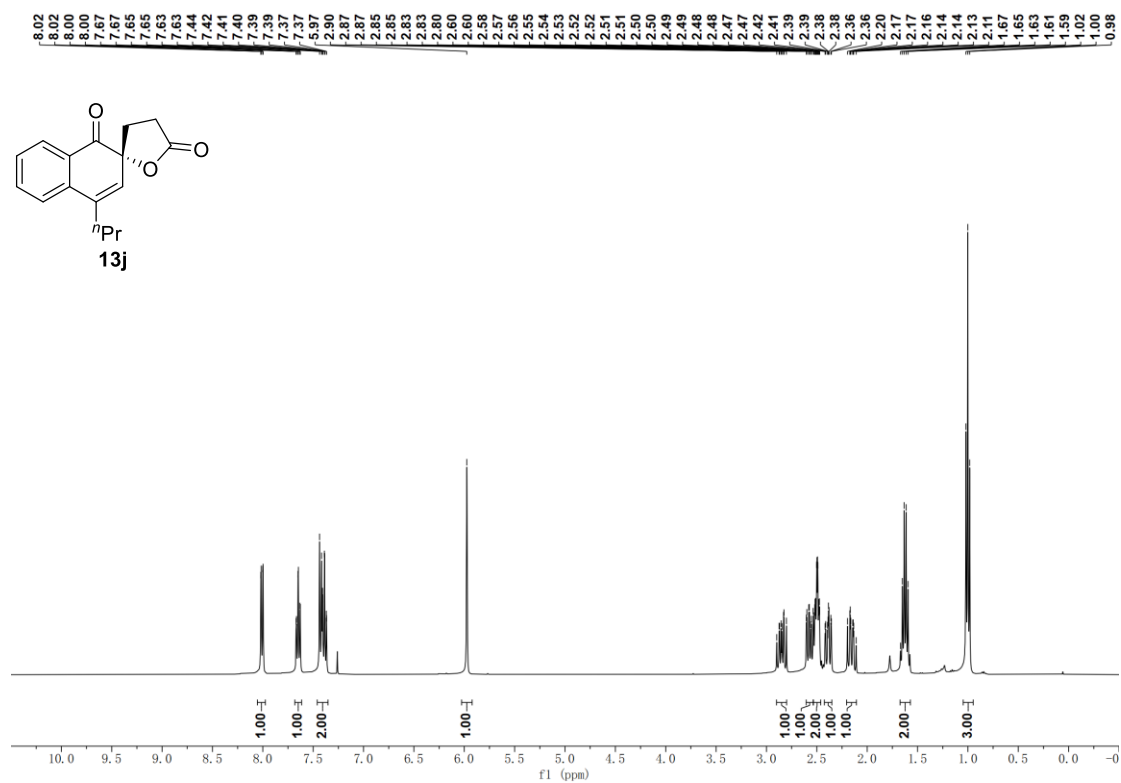

Supplementary Figure 123.  $^1\text{H}$  NMR Spectrum of **13j** (400 MHz,  $\text{CDCl}_3$ )

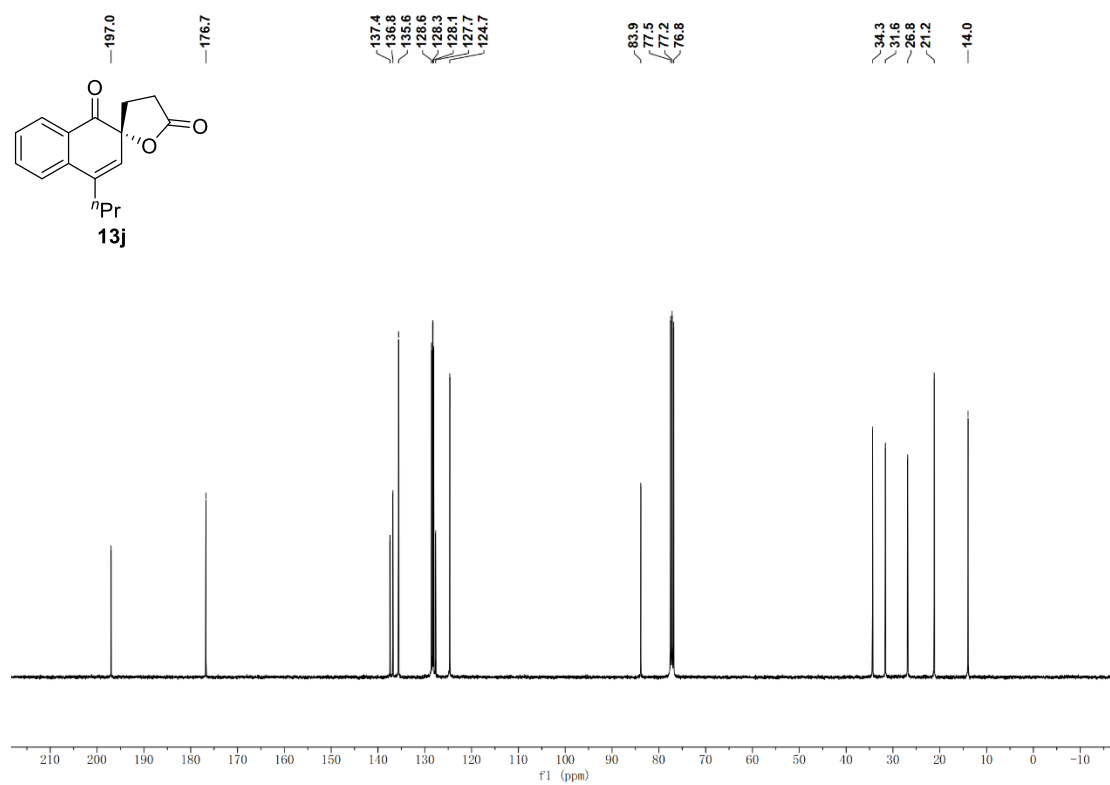

Supplementary Figure 124.  $^{13}\text{C}$  NMR Spectrum of **13j** (100 MHz,  $\text{CDCl}_3$ )

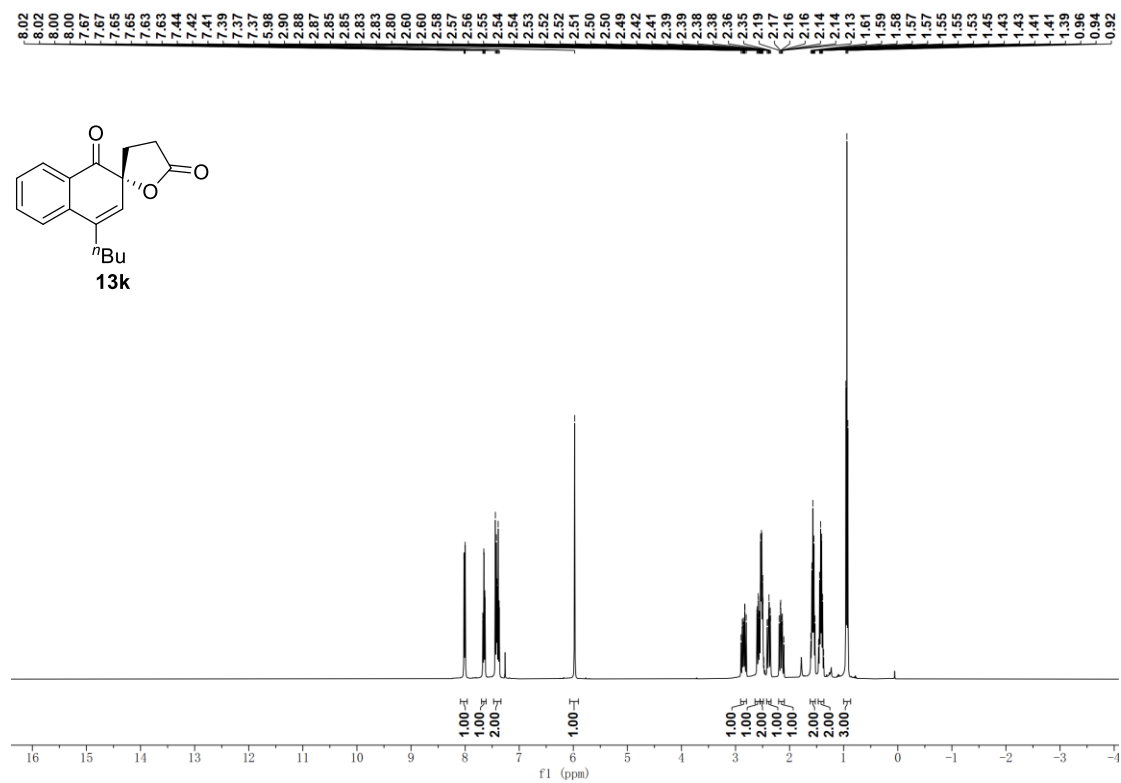

Supplementary Figure 125.  $^1\text{H}$  NMR Spectrum of **13k** (400 MHz,  $\text{CDCl}_3$ )

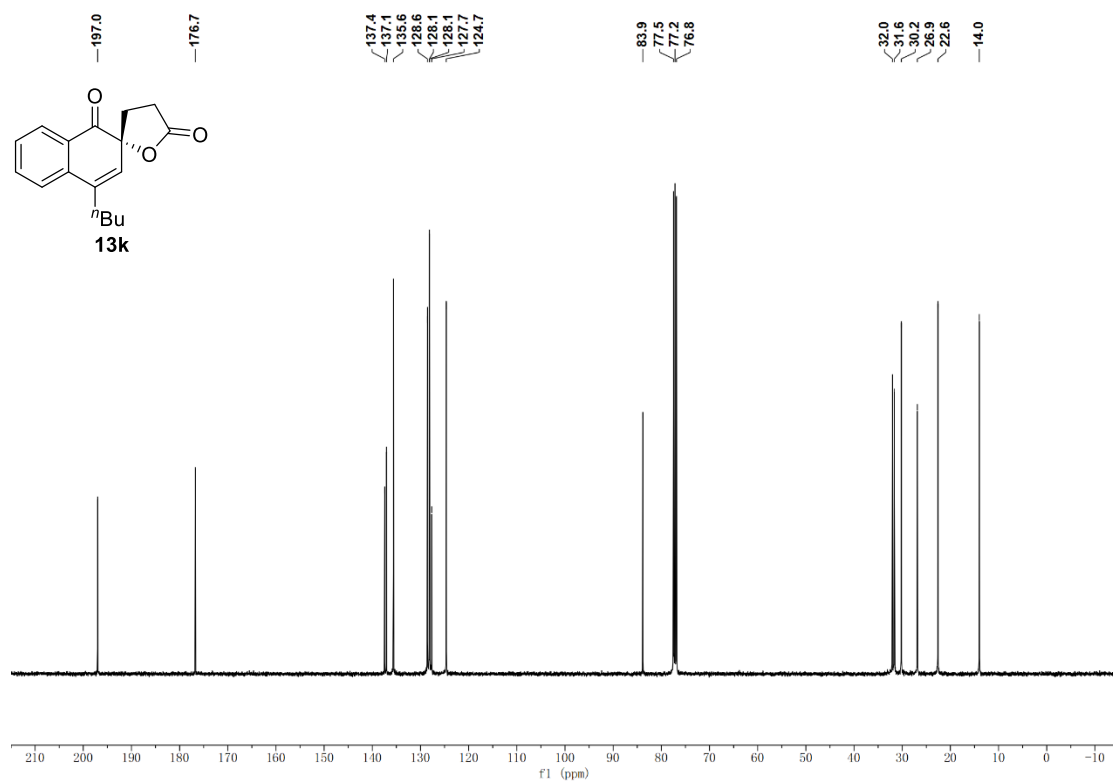

Supplementary Figure 126.  $^{13}\text{C}$  NMR Spectrum of **13k** (100 MHz,  $\text{CDCl}_3$ )

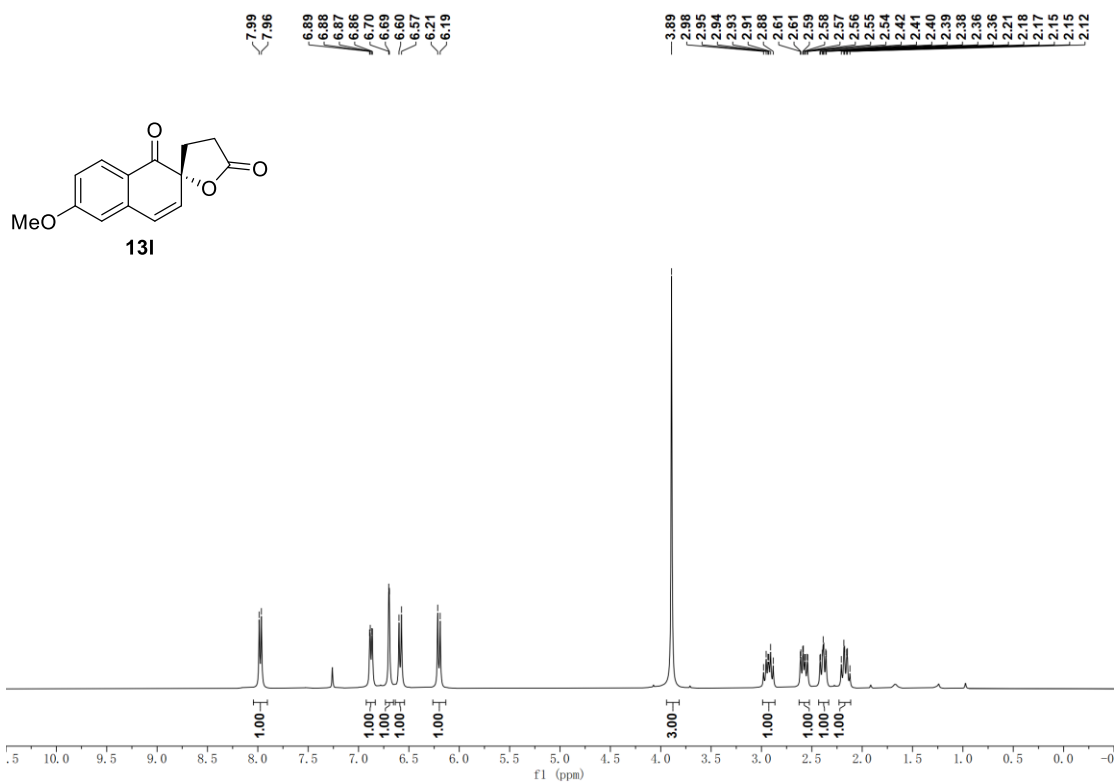

**Supplementary Figure 127. <sup>1</sup>H NMR Spectrum of 131 (400 MHz, CDCl<sub>3</sub>)**

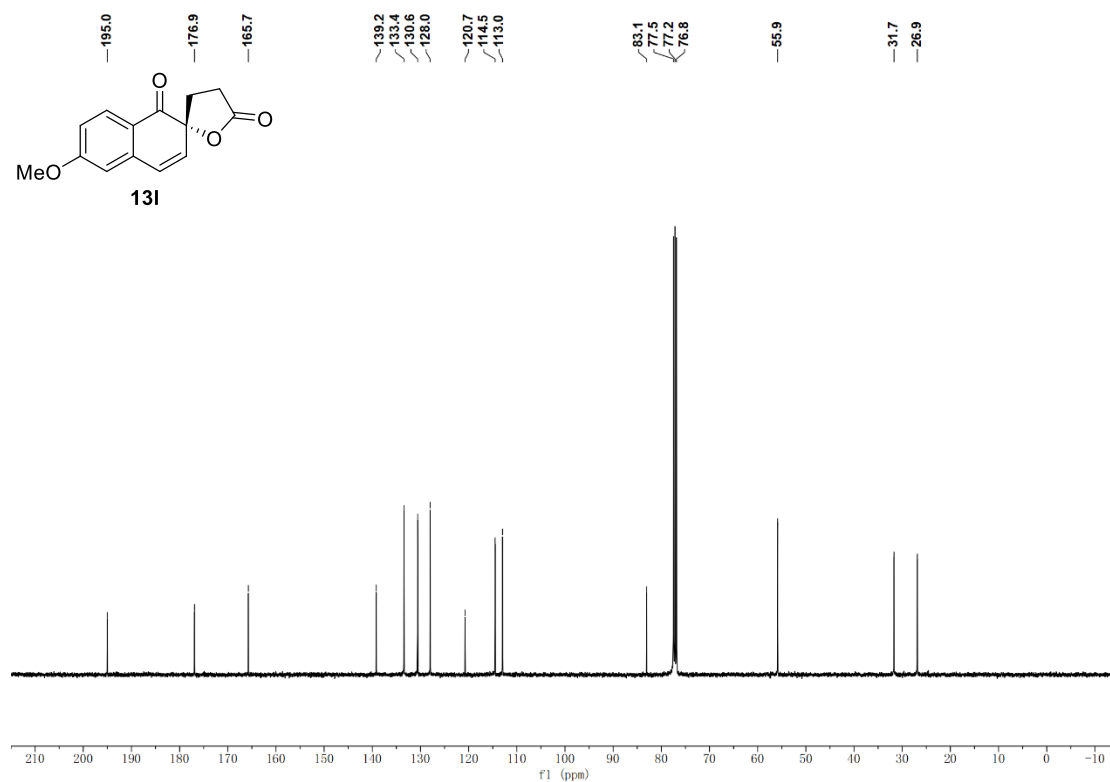

**Supplementary Figure 128. <sup>13</sup>C NMR Spectrum of 131 (100 MHz, CDCl<sub>3</sub>)**

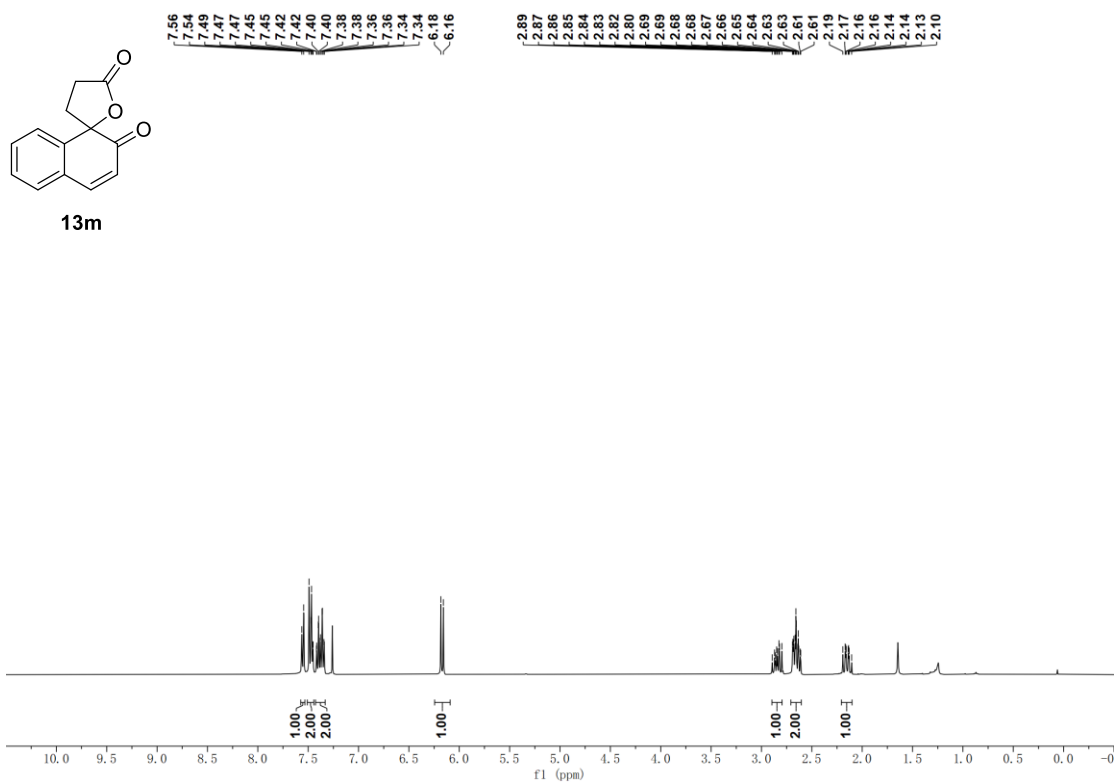

**Supplementary Figure 129.  $^1\text{H}$  NMR Spectrum of **13m** (400 MHz,  $\text{CDCl}_3$ )**

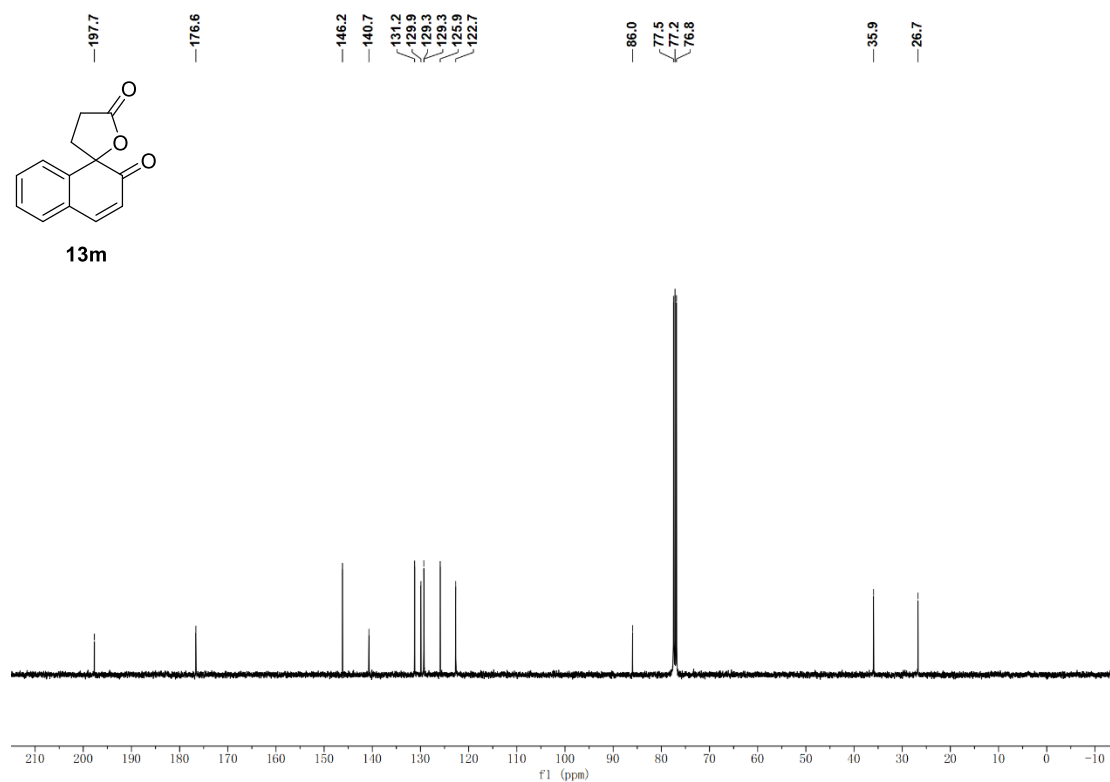

**Supplementary Figure 130.  $^{13}\text{C}$  NMR Spectrum of **13m** (100 MHz,  $\text{CDCl}_3$ )**

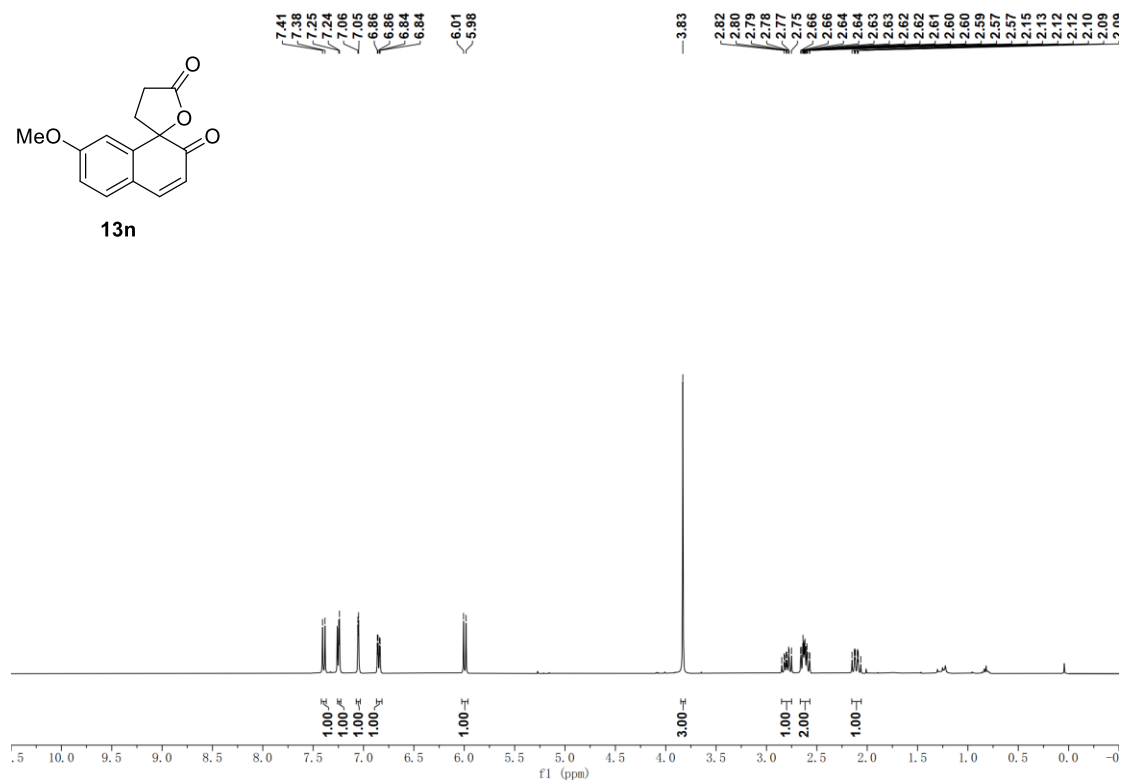

**Supplementary Figure 131.** <sup>1</sup>H NMR Spectrum of **13n** (400 MHz, CDCl<sub>3</sub>)

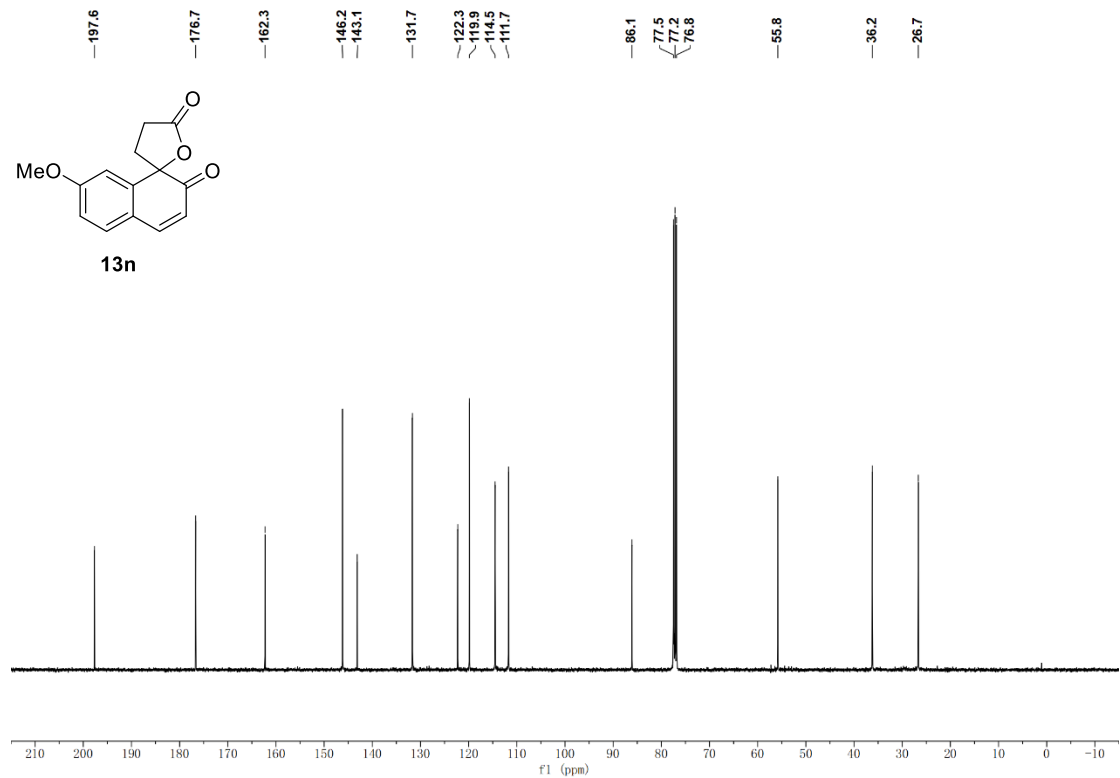

**Supplementary Figure 132.** <sup>13</sup>C NMR Spectrum of **13n** (100 MHz, CDCl<sub>3</sub>)

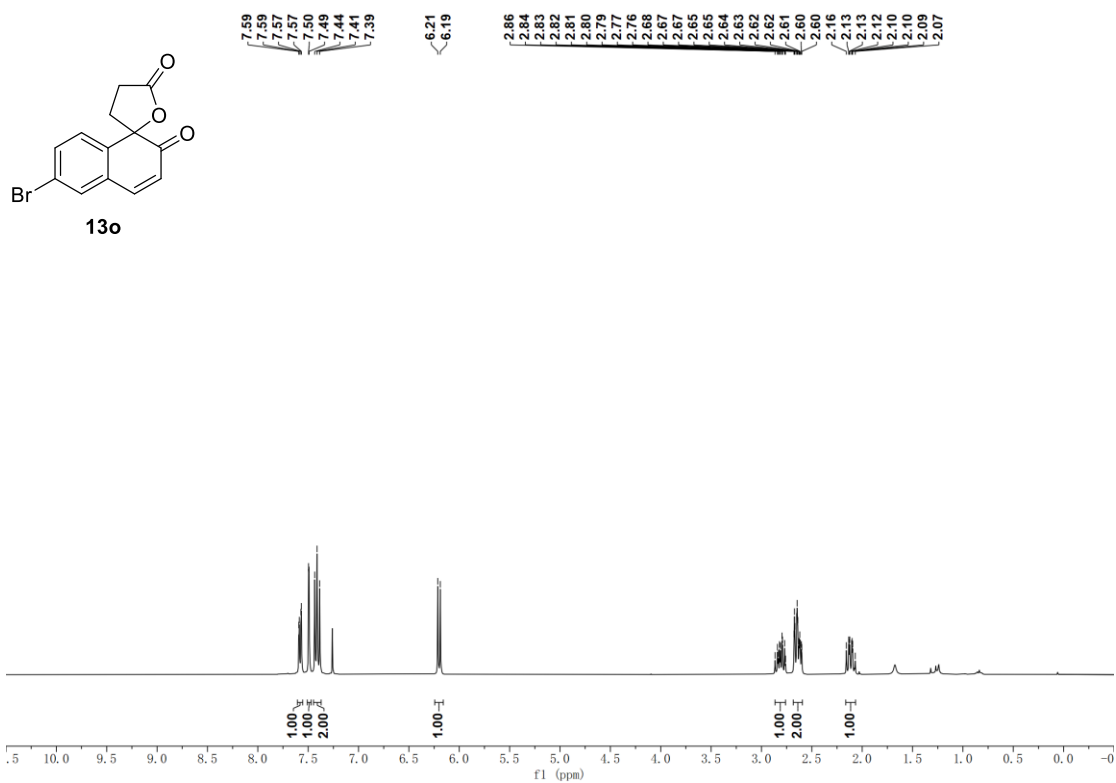

**Supplementary Figure 133.**  $^1\text{H}$  NMR Spectrum of **13o** (400 MHz,  $\text{CDCl}_3$ )

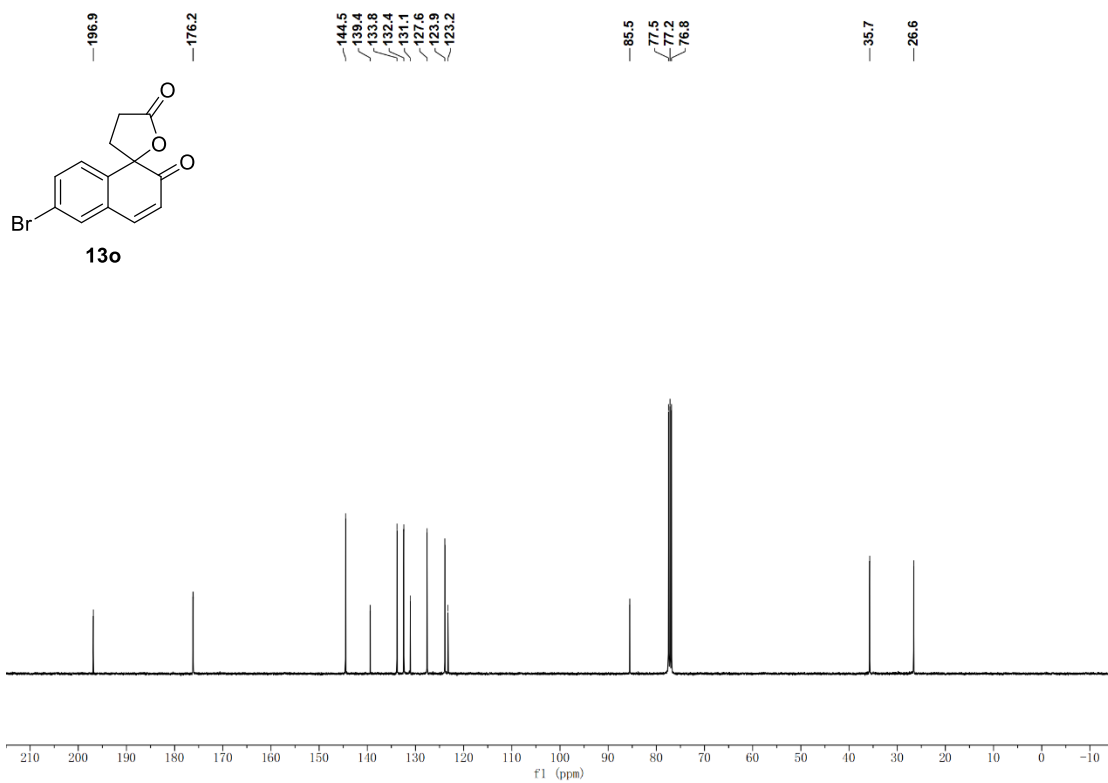

**Supplementary Figure 134.**  $^{13}\text{C}$  NMR Spectrum of **13o** (100 MHz,  $\text{CDCl}_3$ )



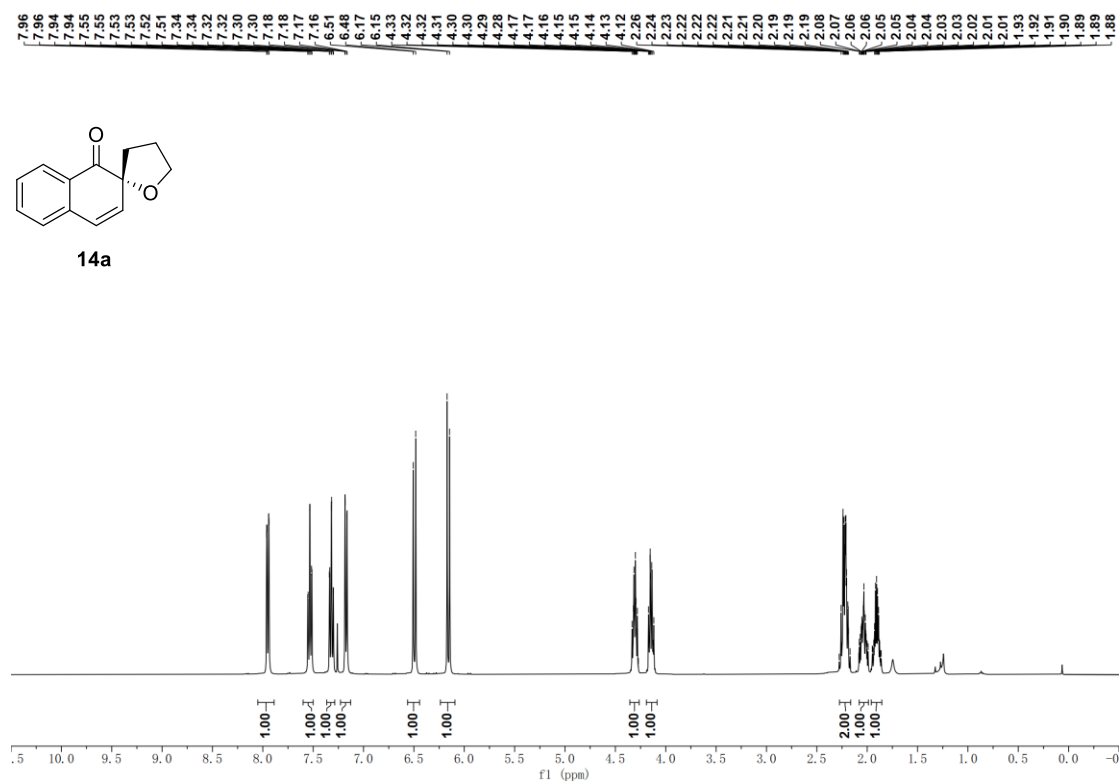

**Supplementary Figure 135.**  $^1\text{H}$  NMR Spectrum of **14a** (400 MHz,  $\text{CDCl}_3$ )

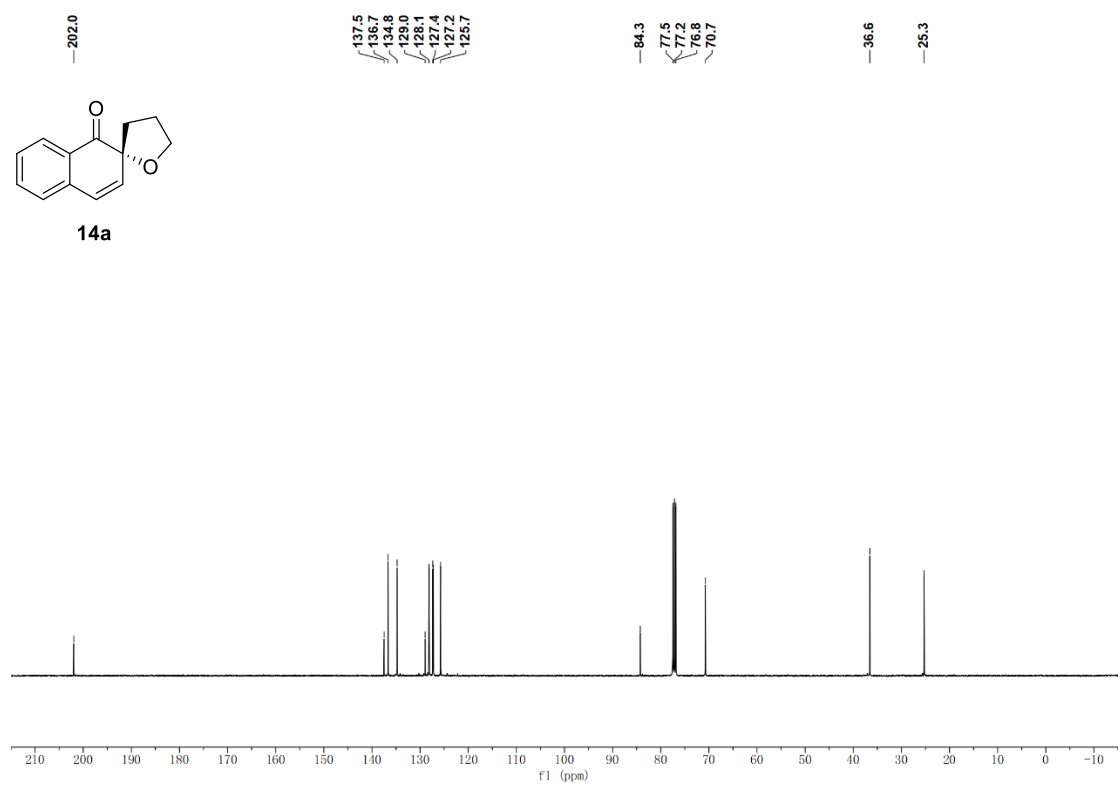

**Supplementary Figure 136.**  $^{13}\text{C}$  NMR Spectrum of **14a** (100 MHz,  $\text{CDCl}_3$ )

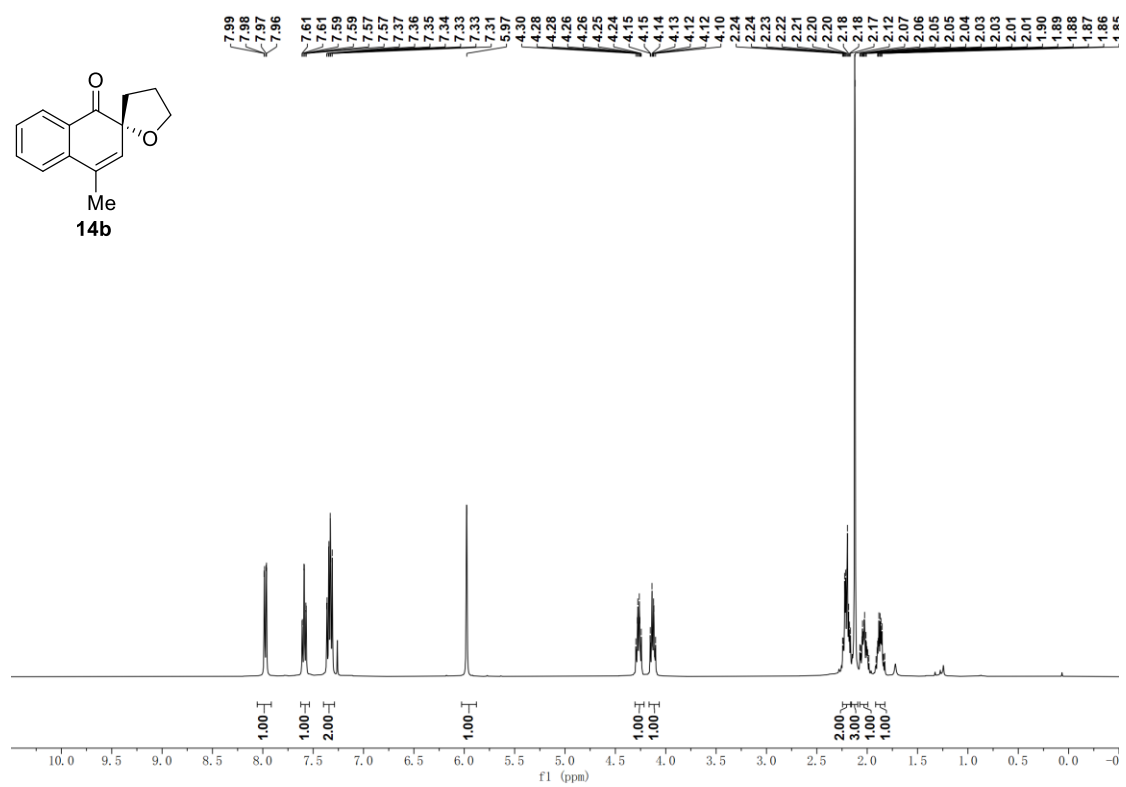

Supplementary Figure 137. <sup>1</sup>H NMR Spectrum of **14b** (400 MHz, CDCl<sub>3</sub>)

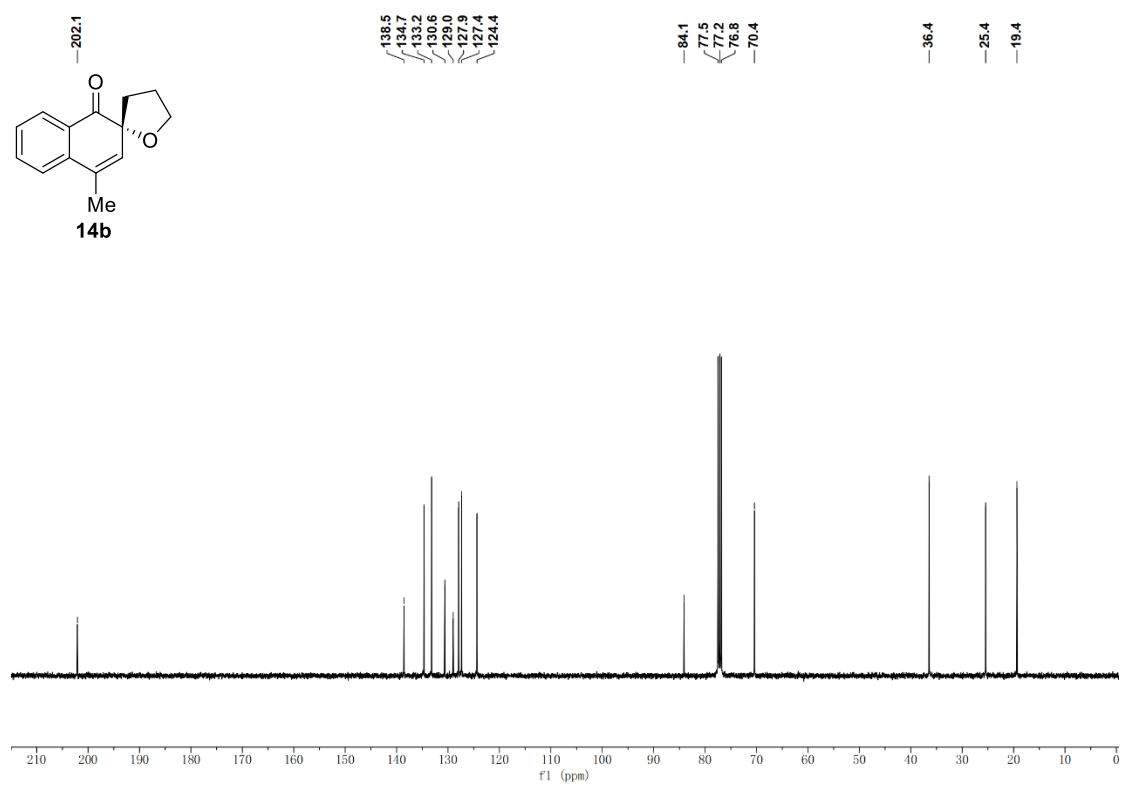

Supplementary Figure 138. <sup>13</sup>C NMR Spectrum of **14b** (100 MHz, CDCl<sub>3</sub>)

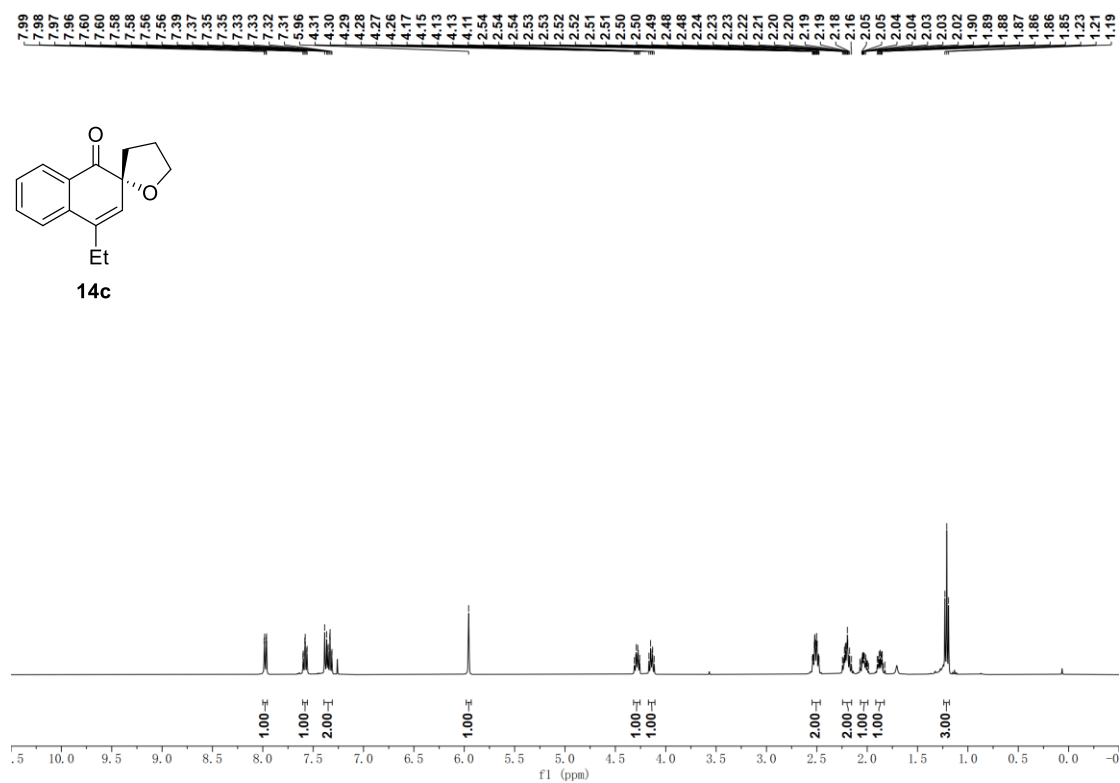

Supplementary Figure 139.  $^1\text{H}$  NMR Spectrum of **14c** (400 MHz,  $\text{CDCl}_3$ )

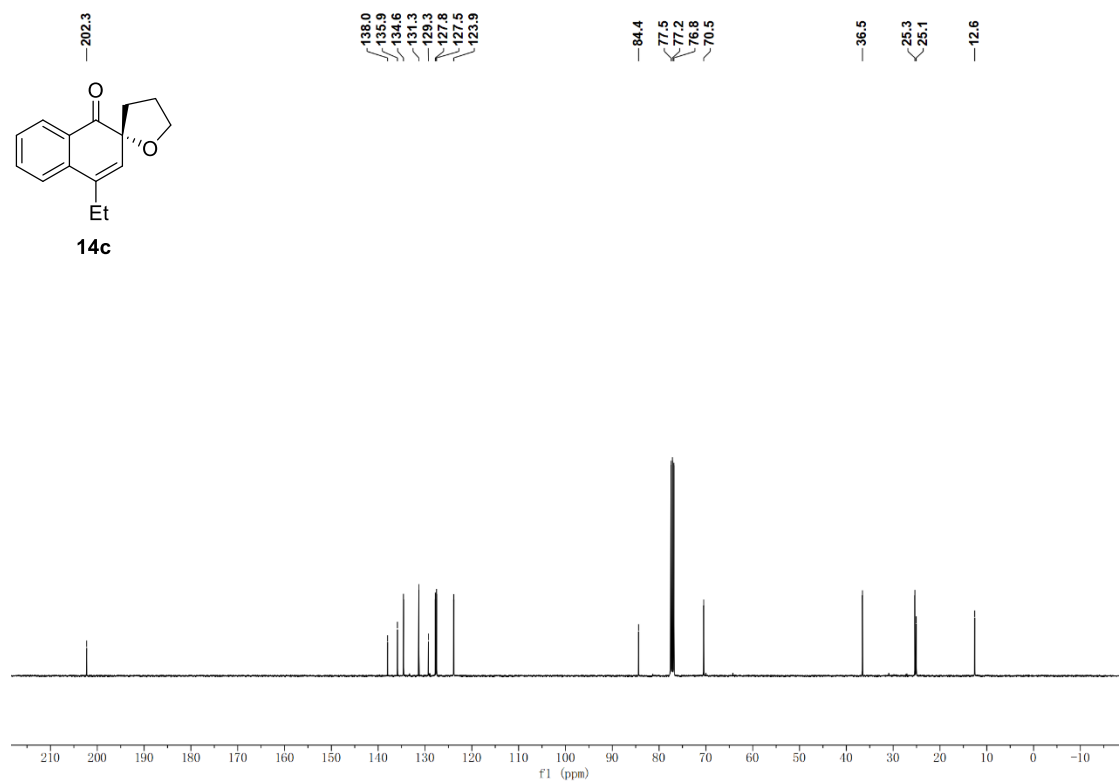

Supplementary Figure 140.  $^{13}\text{C}$  NMR Spectrum of **14c** (100 MHz,  $\text{CDCl}_3$ )

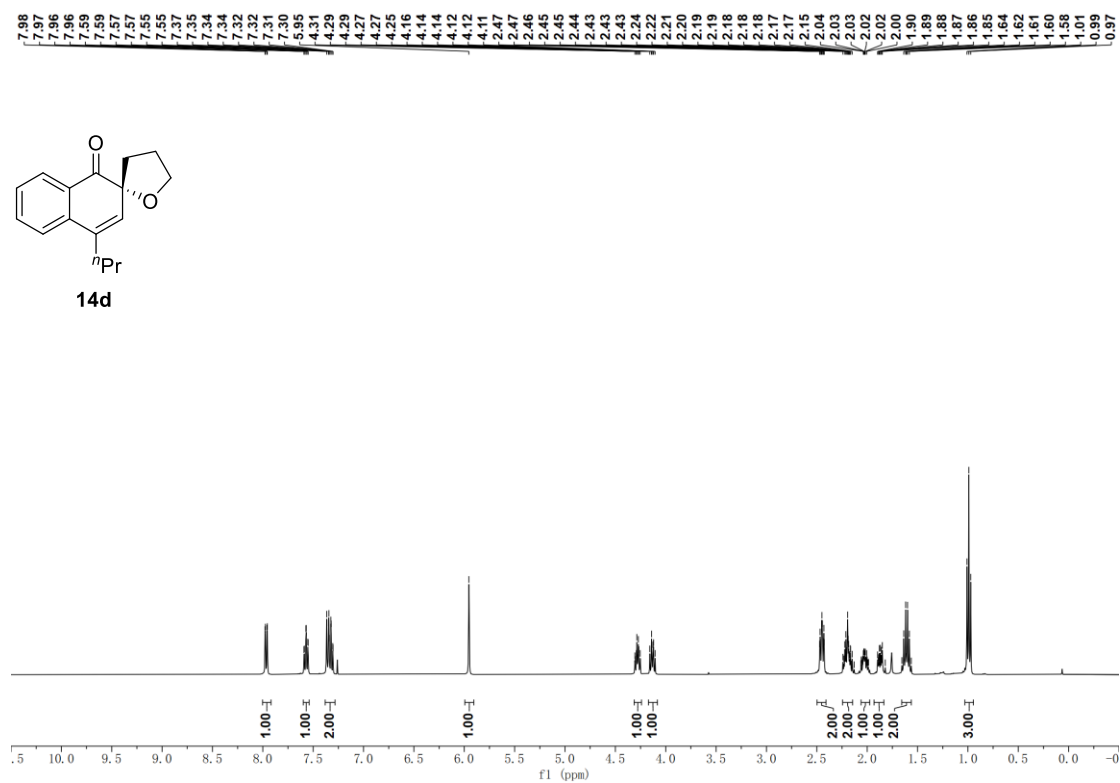

**Supplementary Figure 141.**  $^1\text{H}$  NMR Spectrum of **14d** (400 MHz,  $\text{CDCl}_3$ )

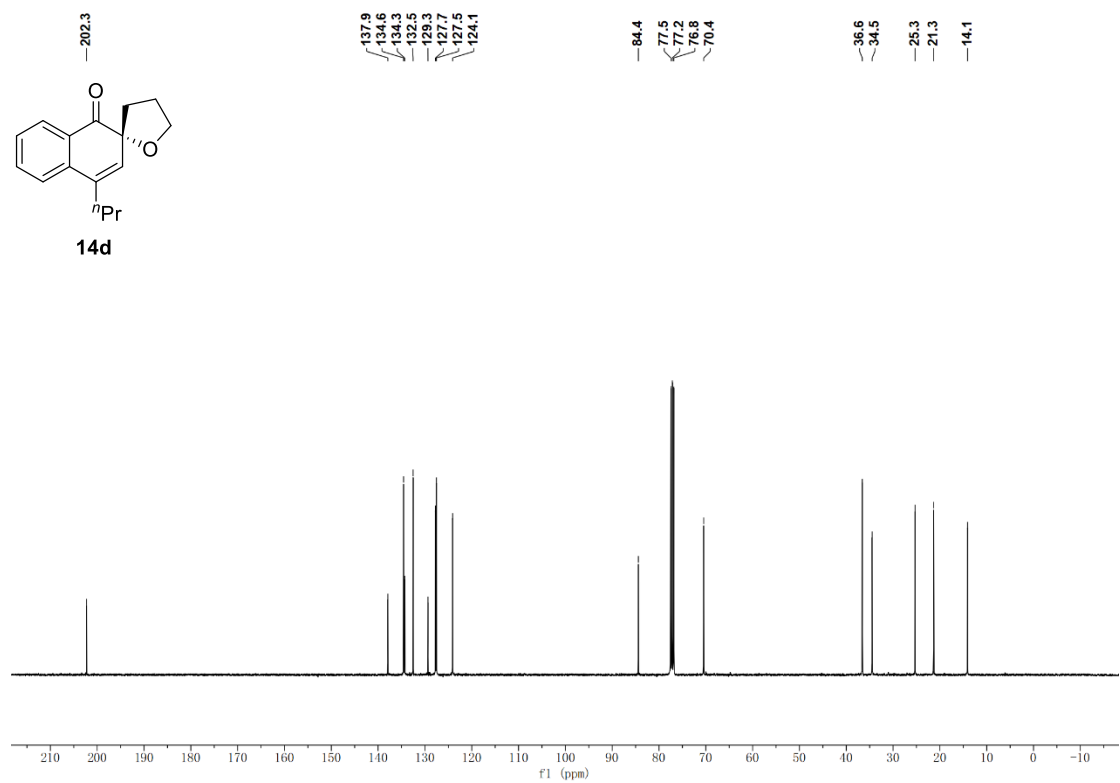

**Supplementary Figure 142.**  $^{13}\text{C}$  NMR Spectrum of **14d** (100 MHz,  $\text{CDCl}_3$ )

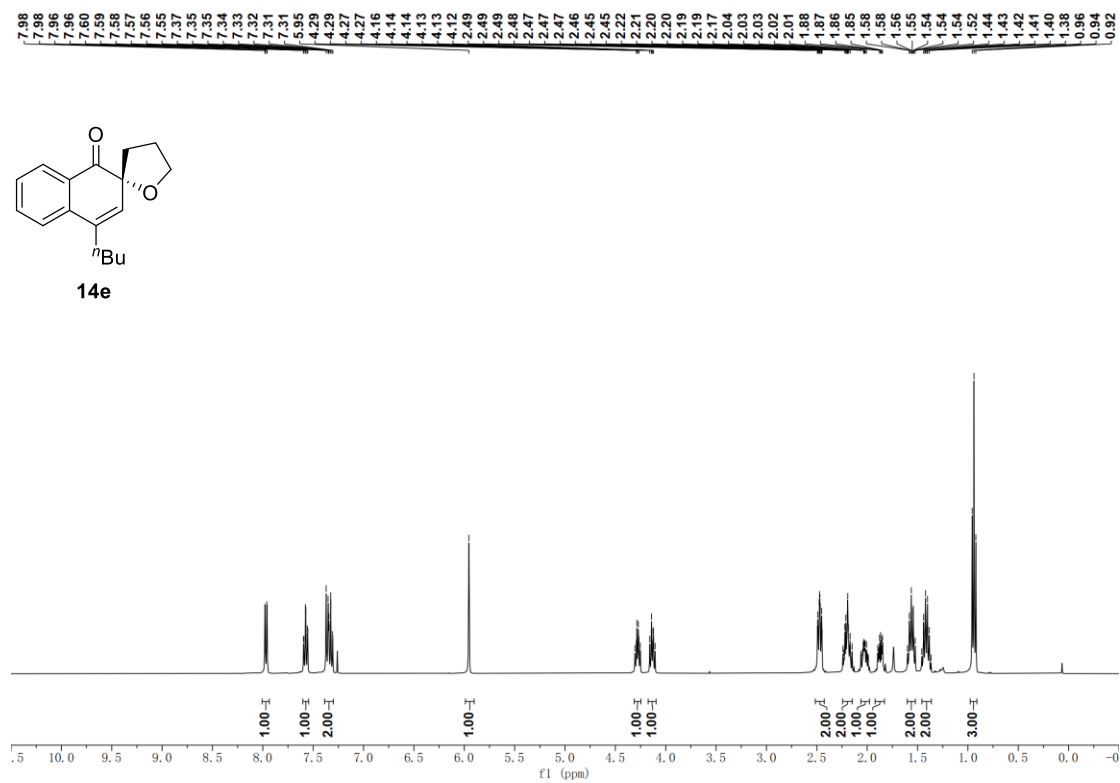

**Supplementary Figure 143.**  $^1\text{H}$  NMR Spectrum of **14e** (400 MHz,  $\text{CDCl}_3$ )

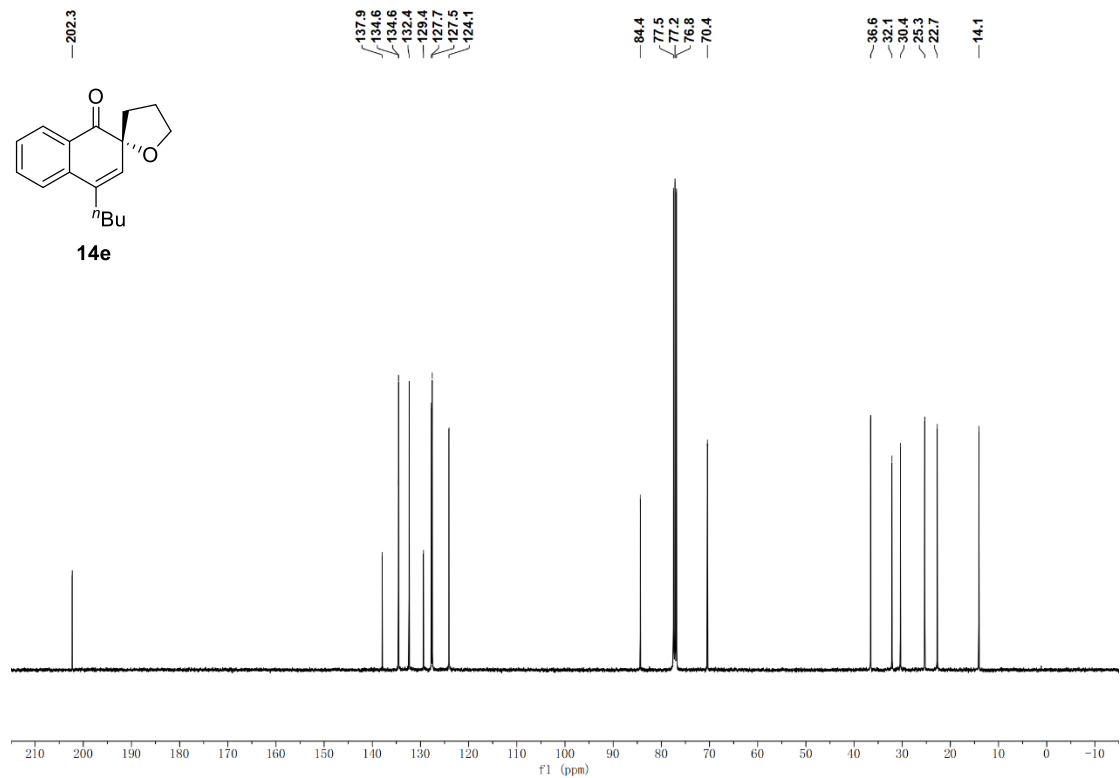

**Supplementary Figure 144.**  $^{13}\text{C}$  NMR Spectrum of **14e** (100 MHz,  $\text{CDCl}_3$ )

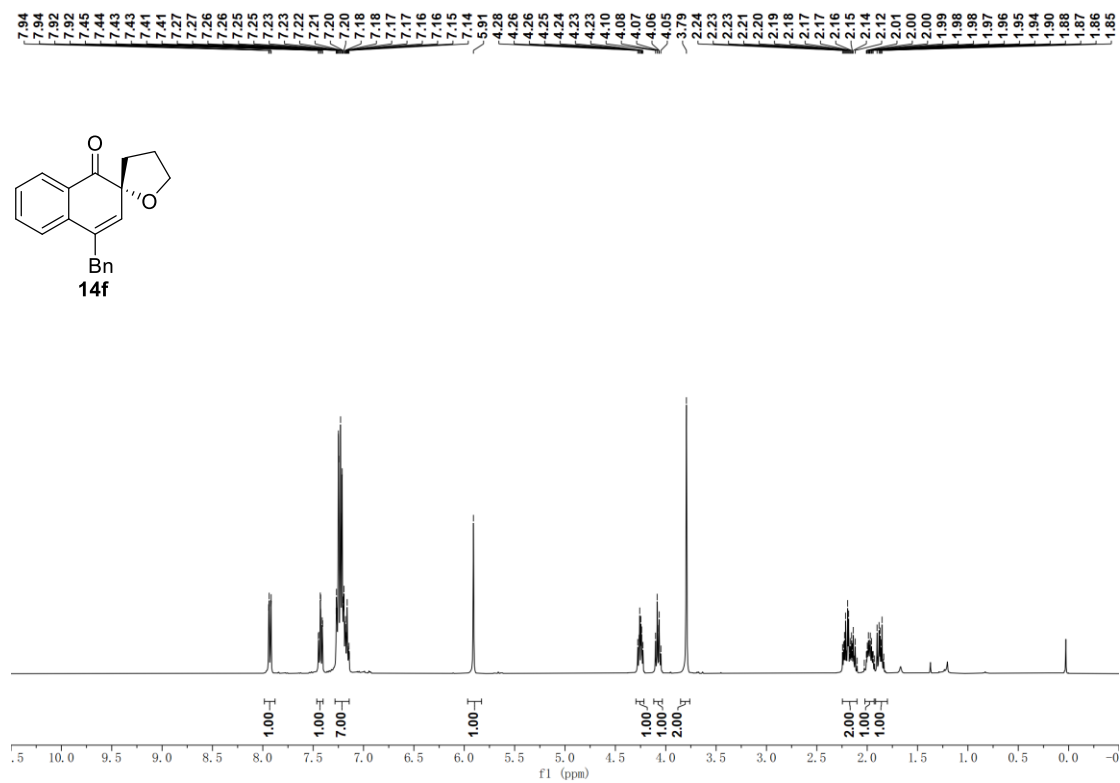

**Supplementary Figure 145.**  $^1\text{H}$  NMR Spectrum of **14f** (400 MHz,  $\text{CDCl}_3$ )

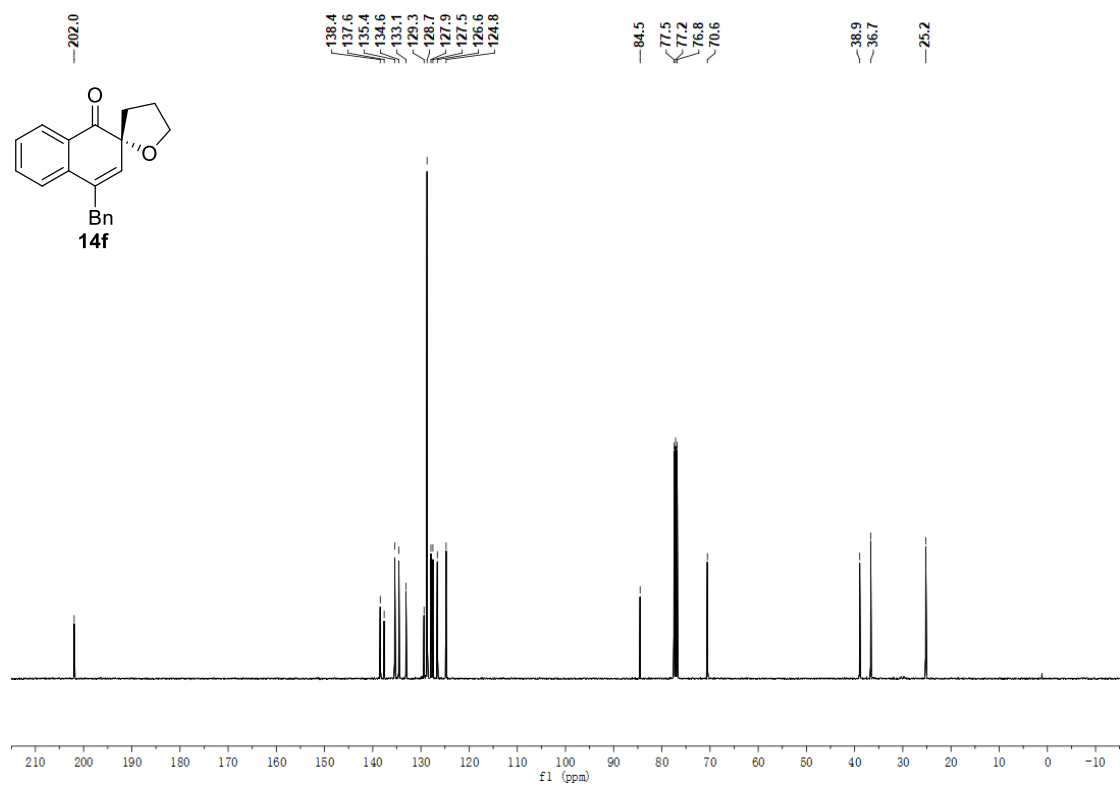

**Supplementary Figure 146.**  $^{13}\text{C}$  NMR Spectrum of **14f** (100 MHz,  $\text{CDCl}_3$ )

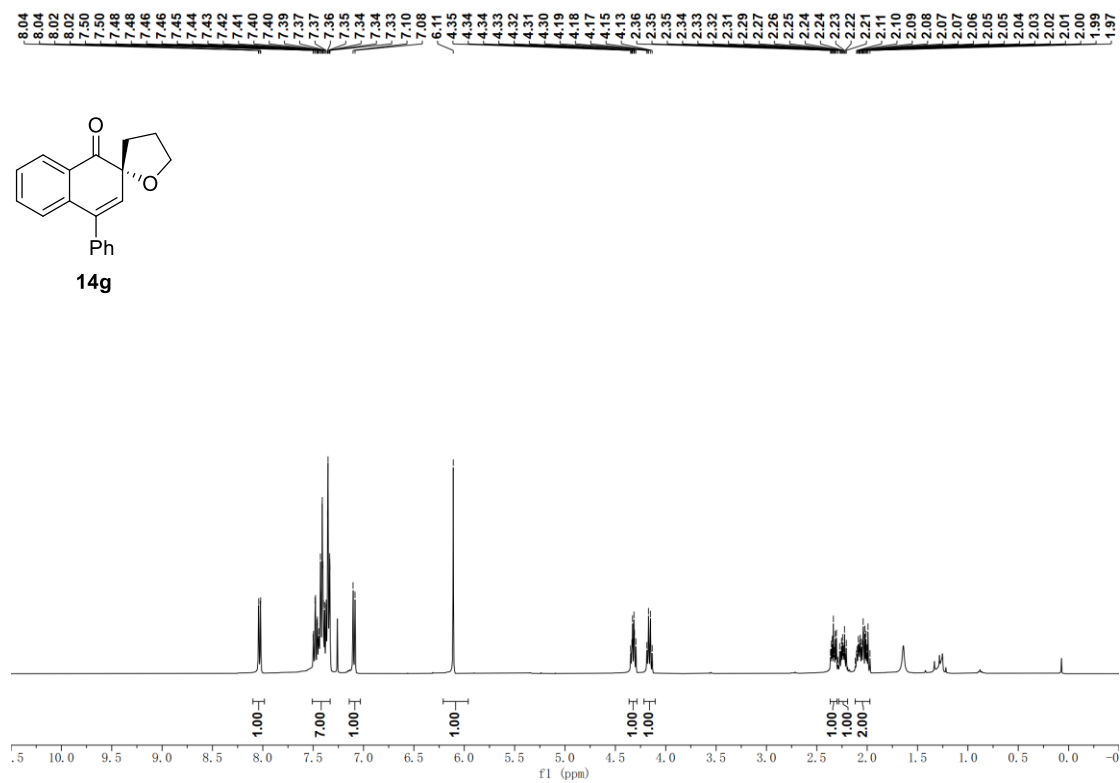

**Supplementary Figure 147.**  $^1\text{H}$  NMR Spectrum of **14g** (400 MHz,  $\text{CDCl}_3$ )

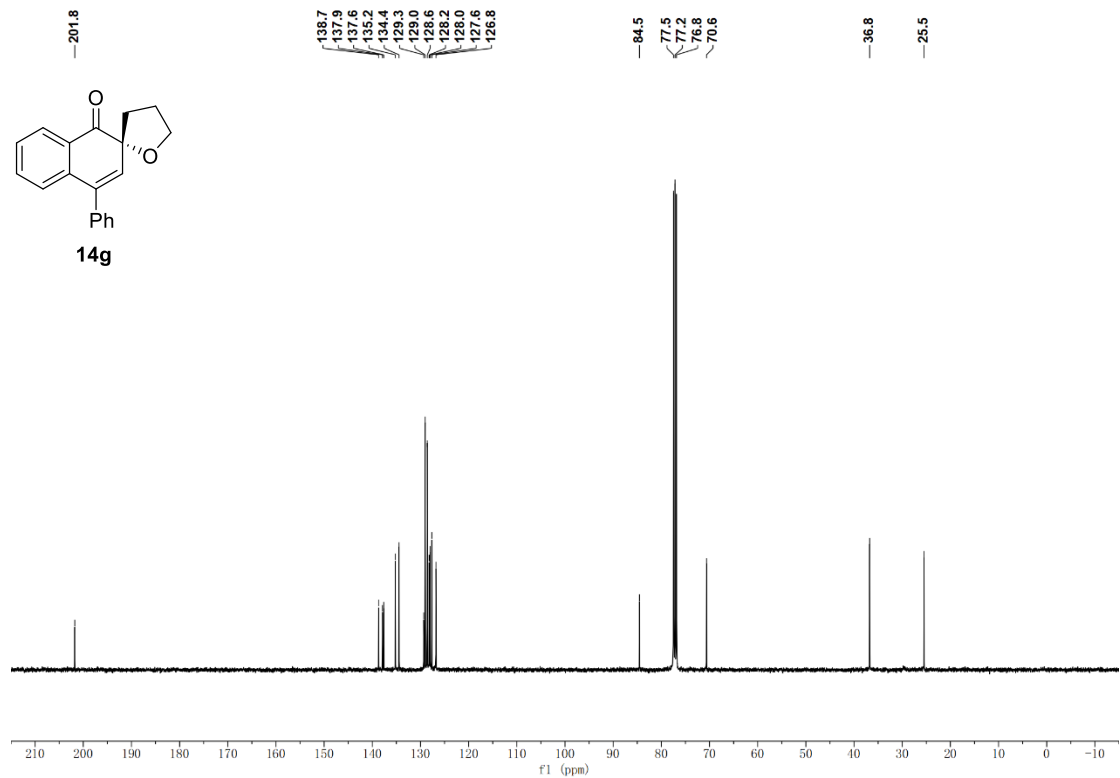

**Supplementary Figure 148.**  $^{13}\text{C}$  NMR Spectrum of **14g** (100 MHz,  $\text{CDCl}_3$ )

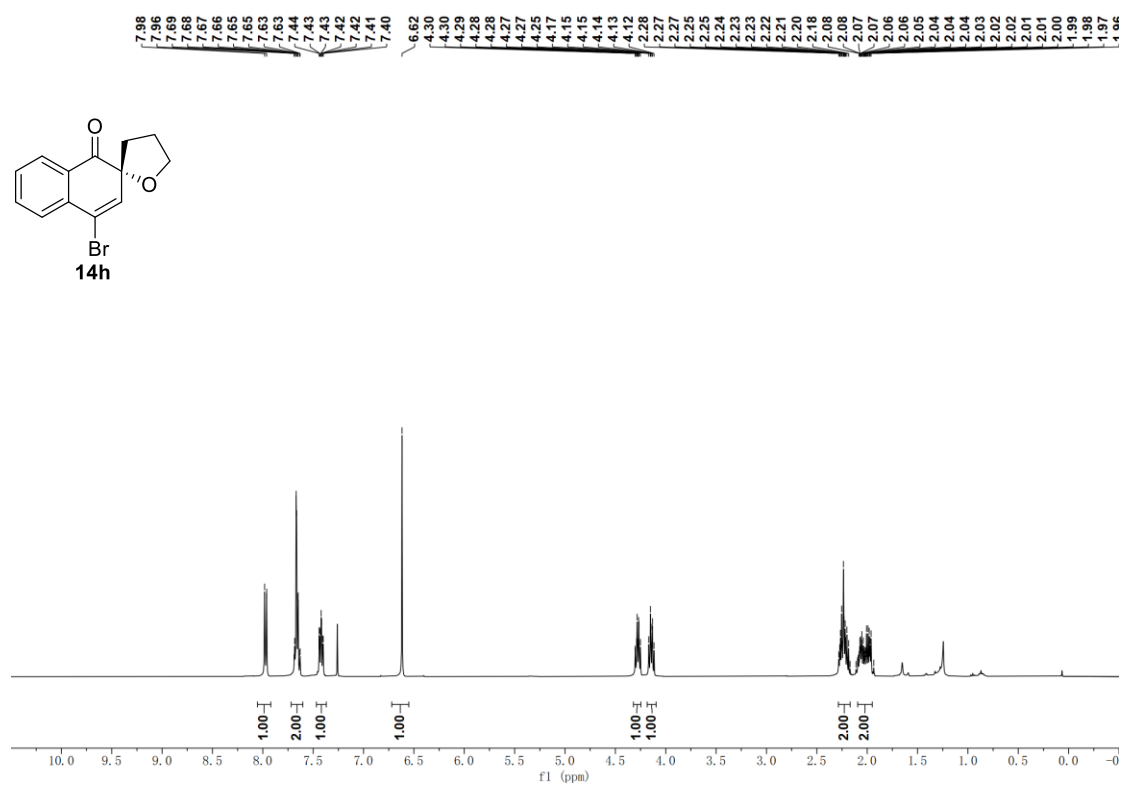

Supplementary Figure 149.  $^1\text{H}$  NMR Spectrum of **14h** (400 MHz,  $\text{CDCl}_3$ )

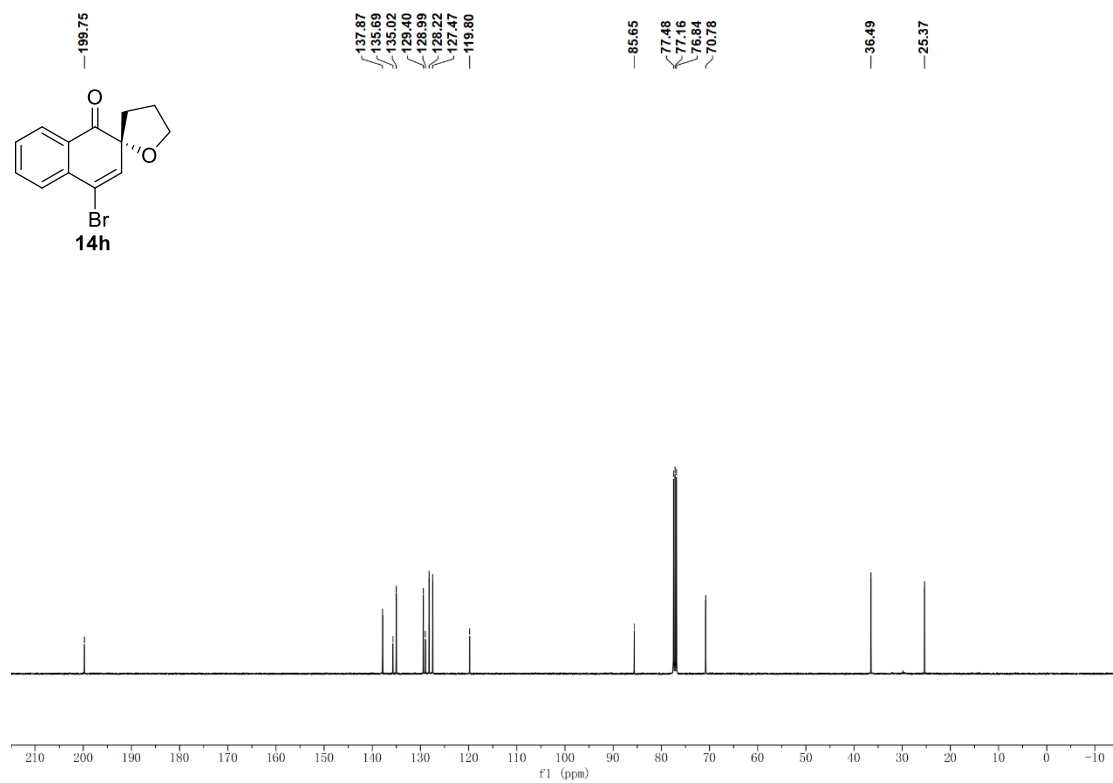

Supplementary Figure 150.  $^{13}\text{C}$  NMR Spectrum of **14h** (100 MHz,  $\text{CDCl}_3$ )



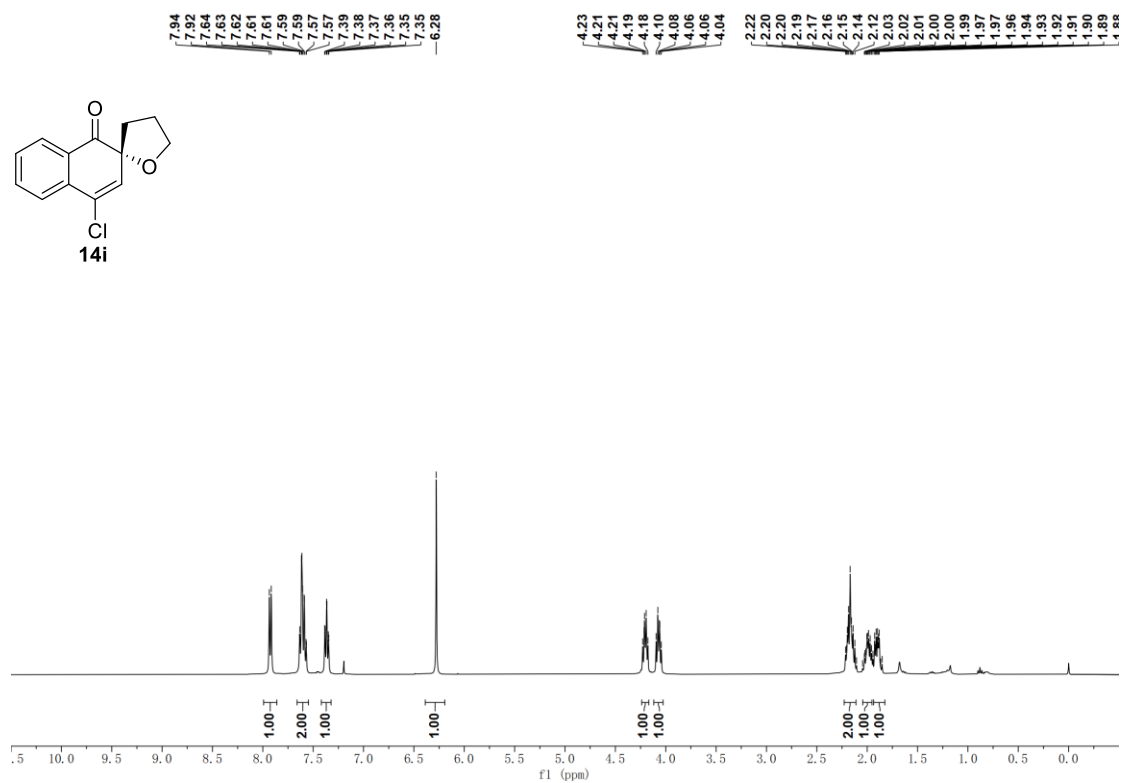

Supplementary Figure 151.  $^1\text{H}$  NMR Spectrum of **14i** (400 MHz,  $\text{CDCl}_3$ )

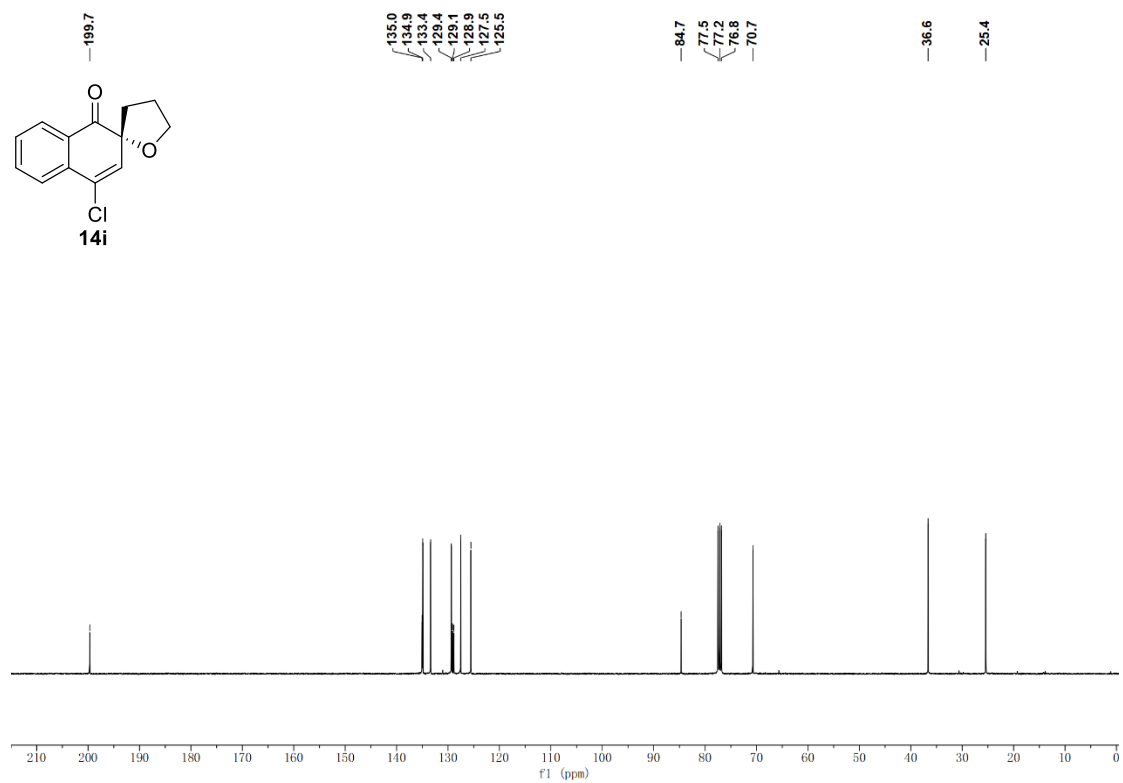

Supplementary Figure 152.  $^{13}\text{C}$  NMR Spectrum of **14i** (100 MHz,  $\text{CDCl}_3$ )

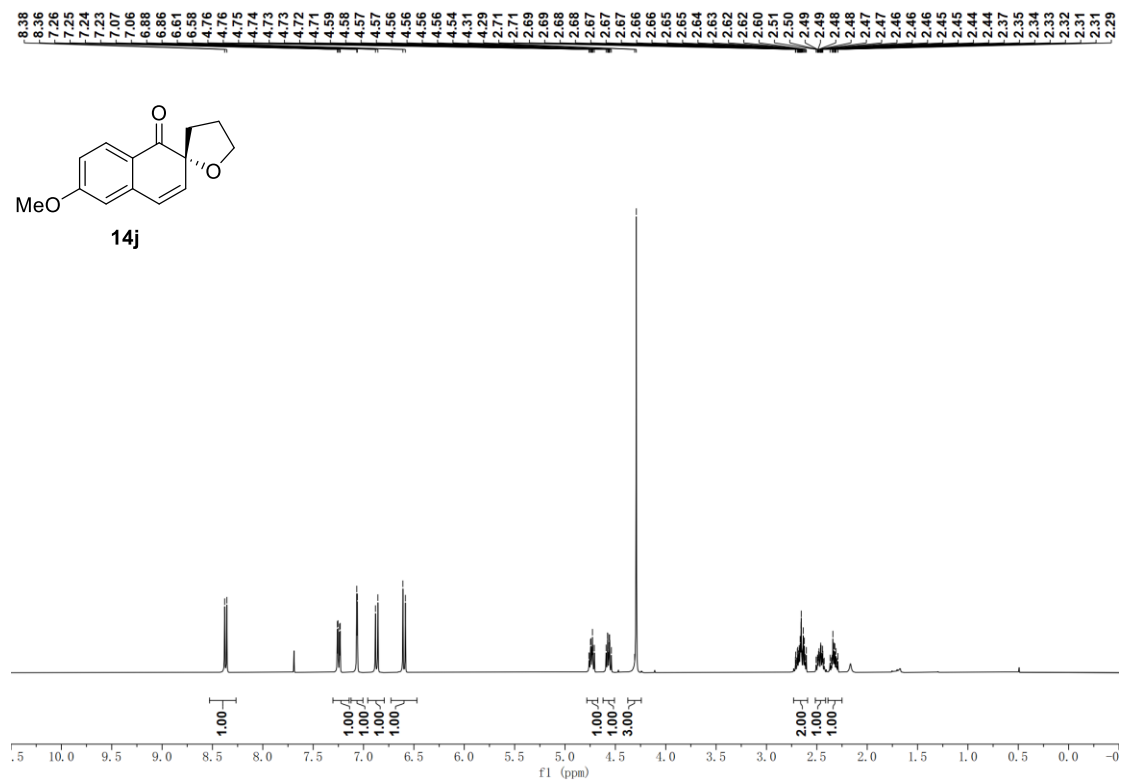

**Supplementary Figure 153.**  $^1\text{H}$  NMR Spectrum of **14j** (400 MHz,  $\text{CDCl}_3$ )

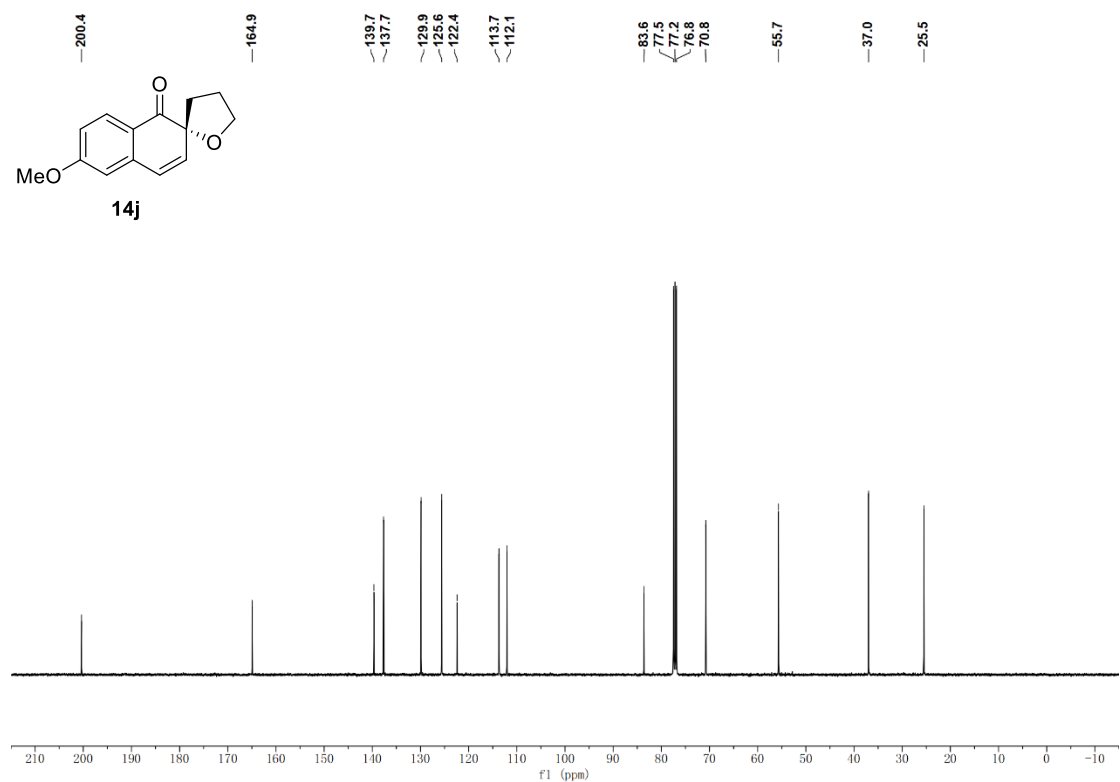

**Supplementary Figure 154.**  $^{13}\text{C}$  NMR Spectrum of **14j** (100 MHz,  $\text{CDCl}_3$ )

## 12.2.2 Spectrum of oxidative spirolactonization

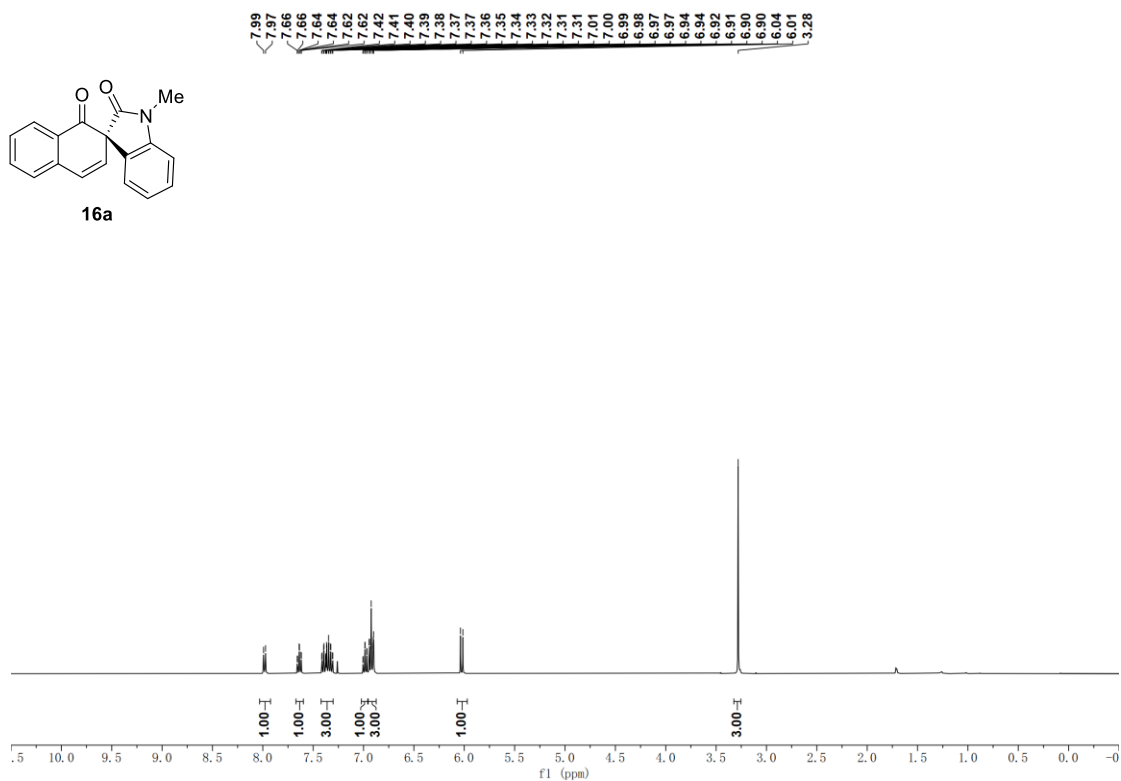

Supplementary Figure 155.  $^1\text{H}$  NMR Spectrum of **16a** (400 MHz,  $\text{CDCl}_3$ )

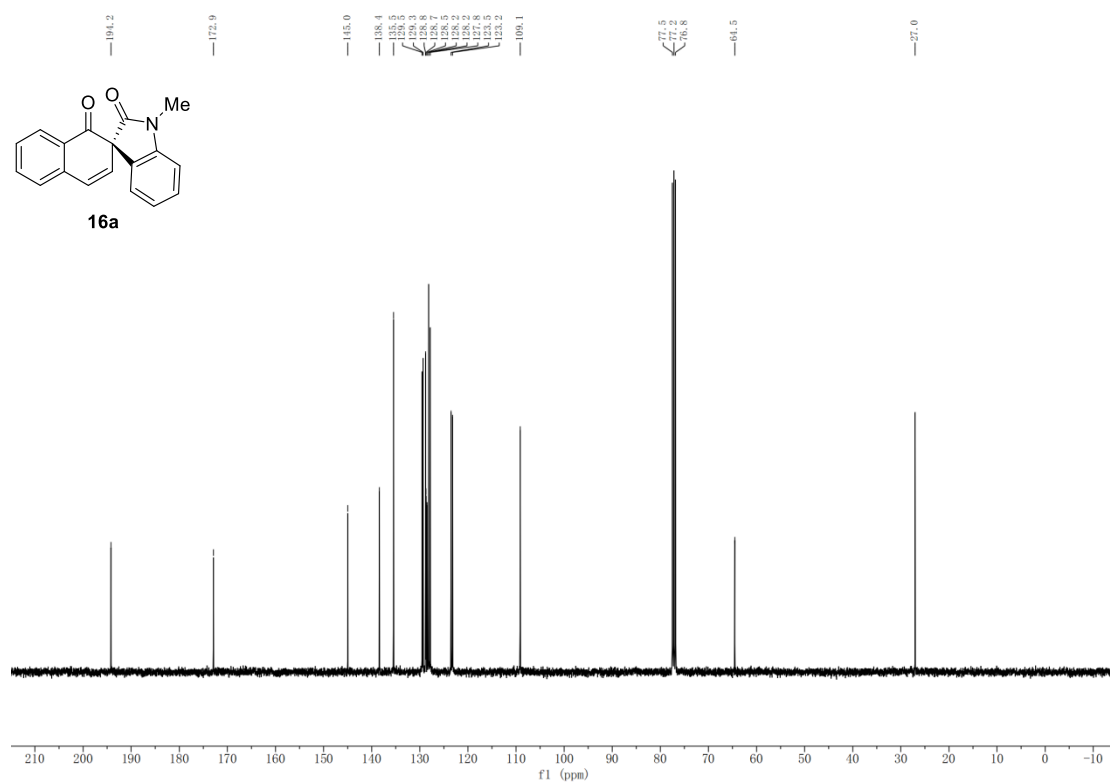

Supplementary Figure 156.  $^{13}\text{C}$  NMR Spectrum of **16a** (100 MHz,  $\text{CDCl}_3$ )

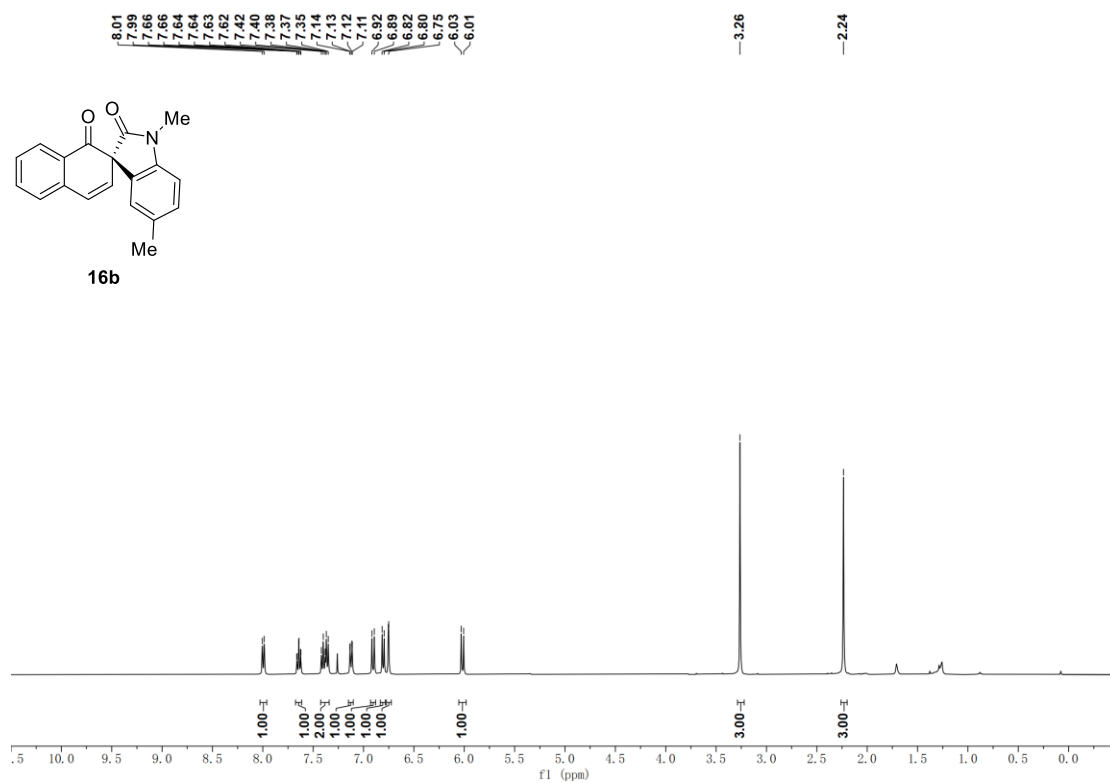

Supplementary Figure 157. <sup>1</sup>H NMR Spectrum of **16b** (400 MHz, CDCl<sub>3</sub>)

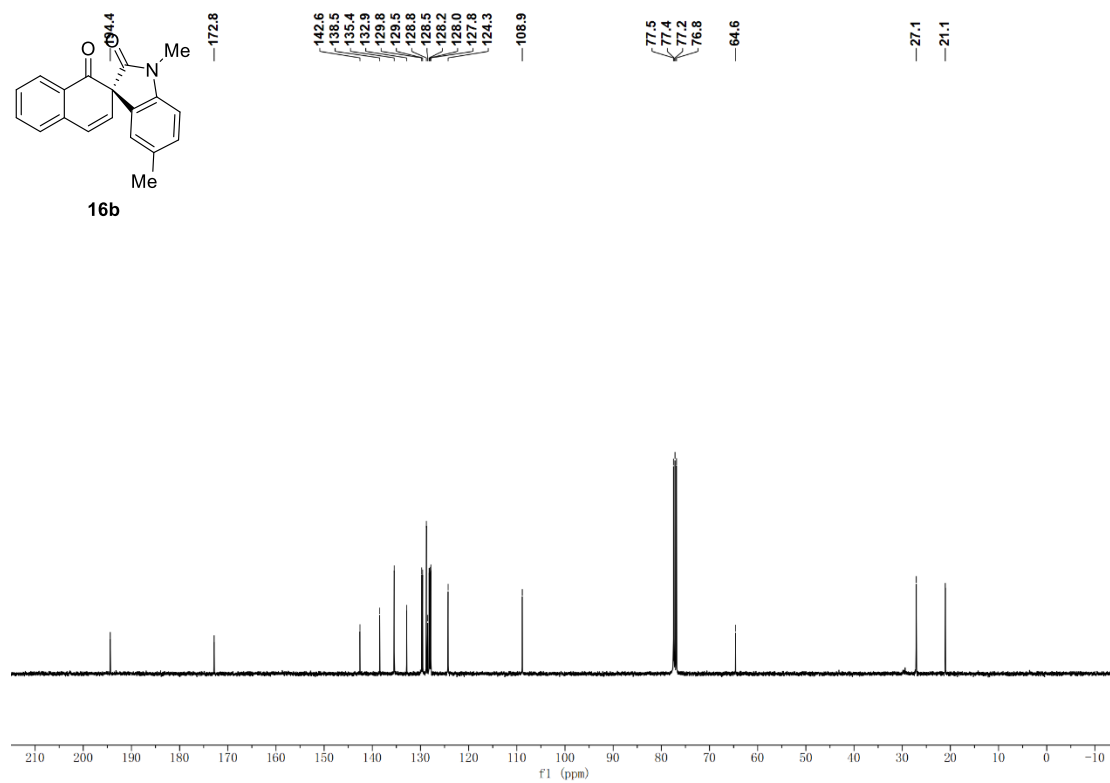

Supplementary Figure 158. <sup>13</sup>C NMR Spectrum of **16b** (100 MHz, CDCl<sub>3</sub>)

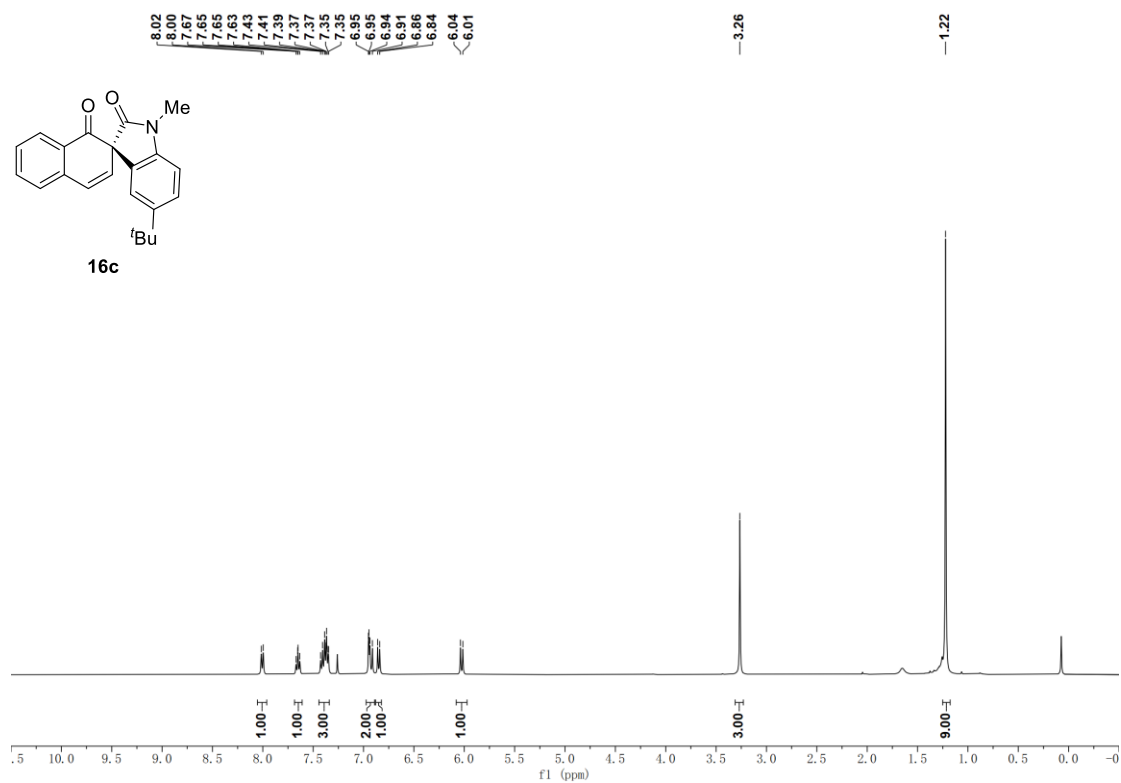

**Supplementary Figure 159.** <sup>1</sup>H NMR Spectrum of **16c** (400 MHz, CDCl<sub>3</sub>)

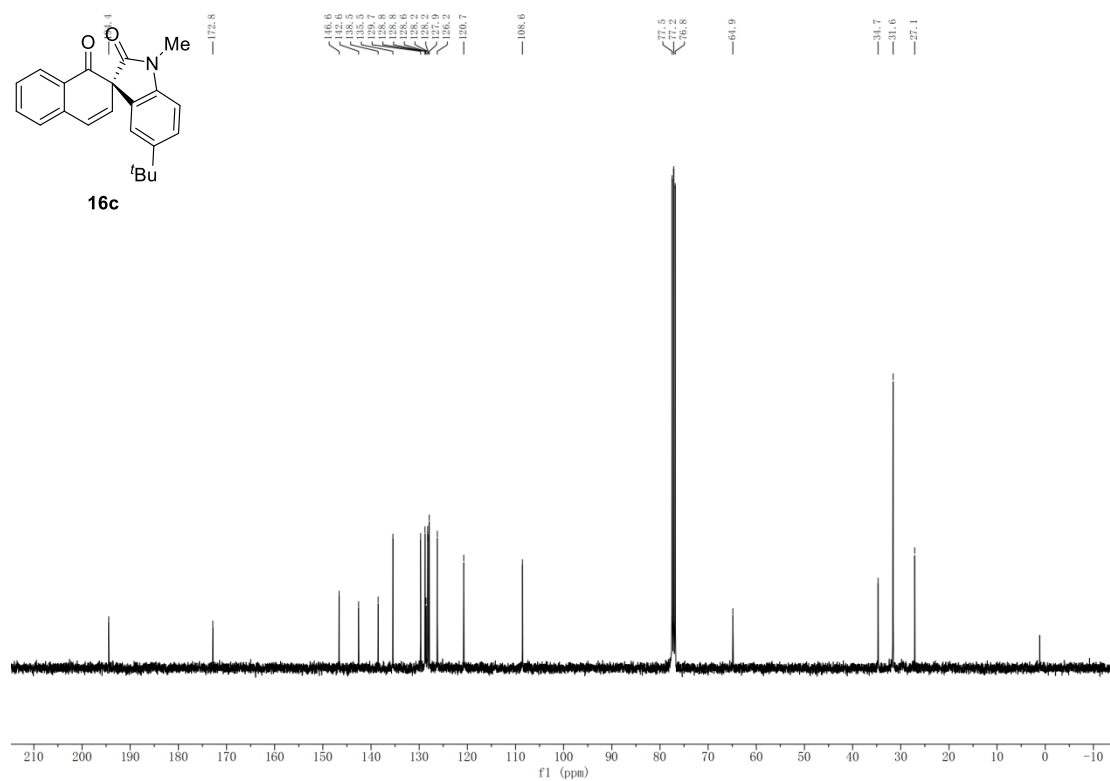

**Supplementary Figure 160.** <sup>13</sup>C NMR Spectrum of **16c** (100 MHz, CDCl<sub>3</sub>)

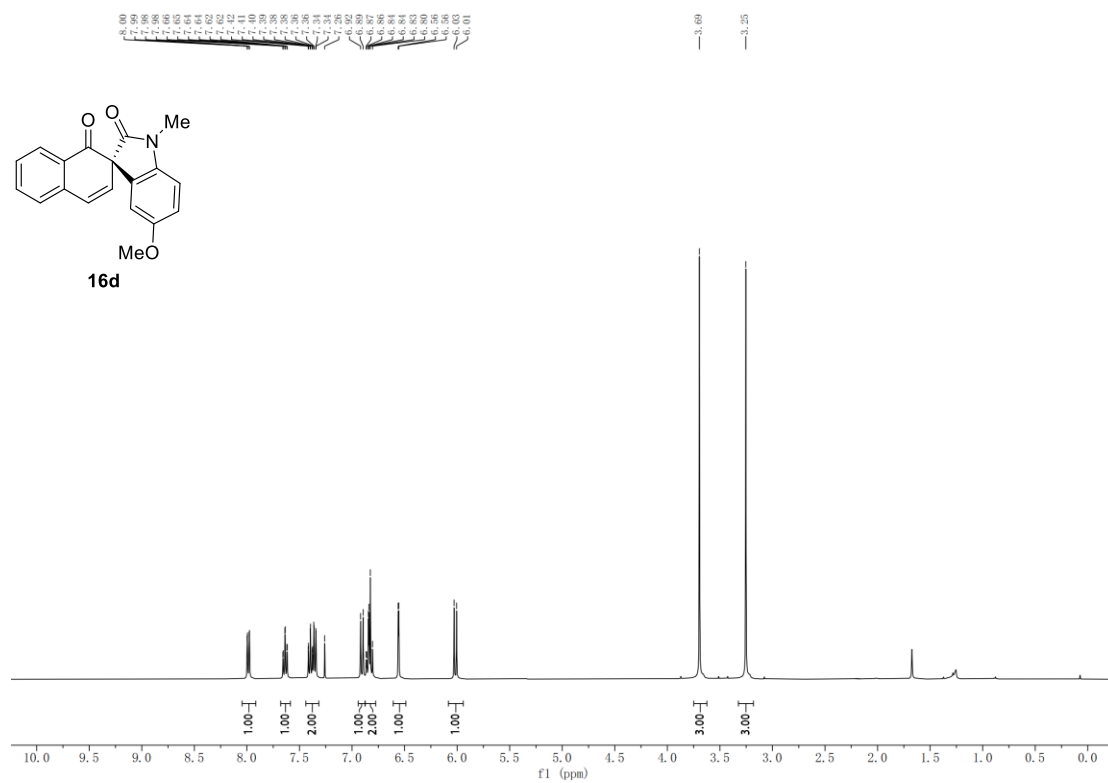

**Supplementary Figure 161.** <sup>1</sup>H NMR Spectrum of **16d** (400 MHz, CDCl<sub>3</sub>)

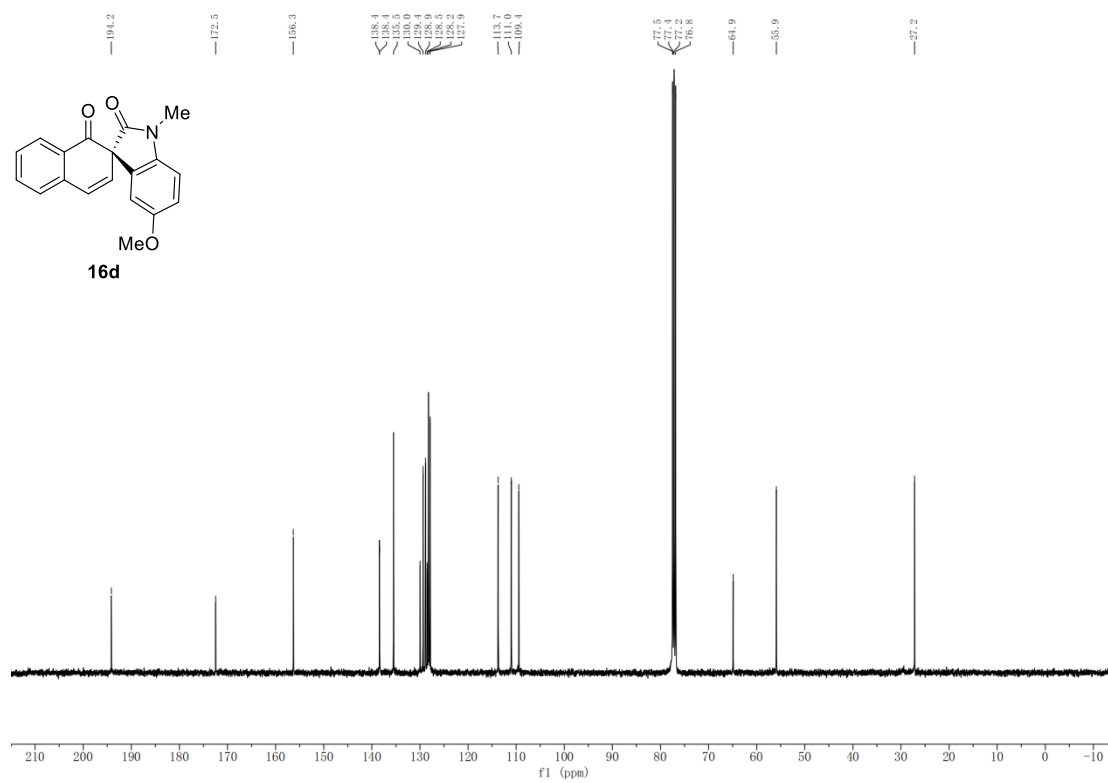

**Supplementary Figure 162.** <sup>13</sup>C NMR Spectrum of **16d** (100 MHz, CDCl<sub>3</sub>)

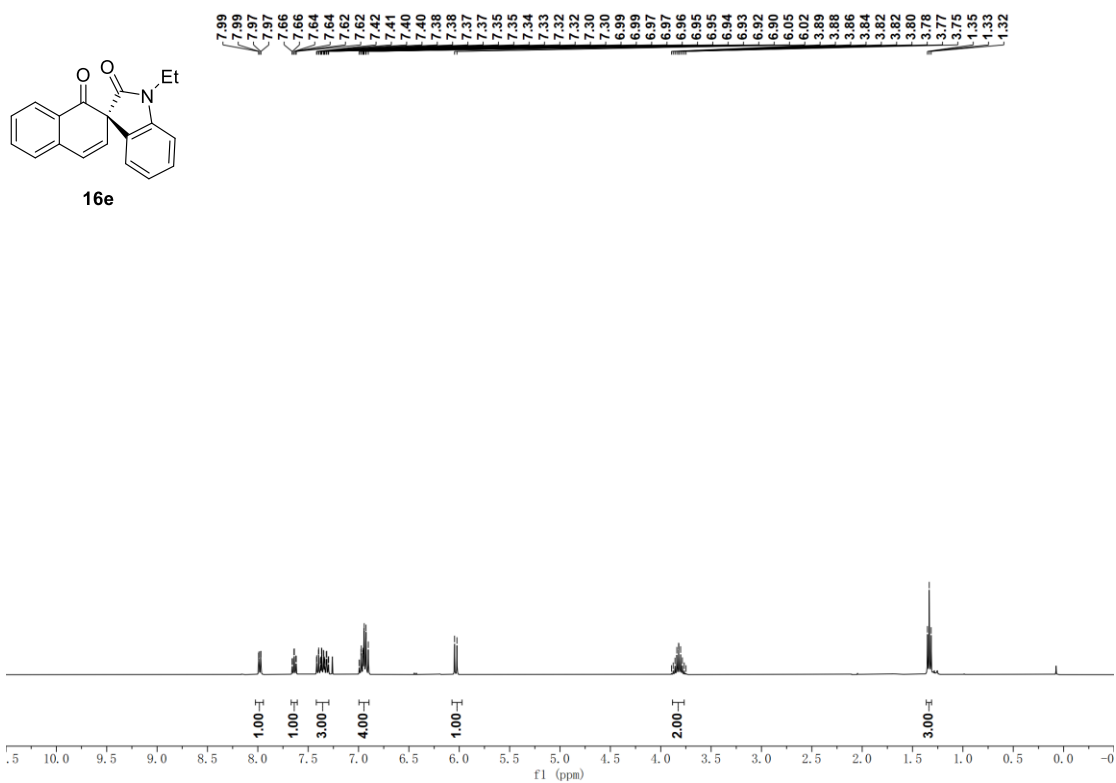

**Supplementary Figure 163.**  $^1\text{H}$  NMR Spectrum of **16e** (400 MHz,  $\text{CDCl}_3$ )

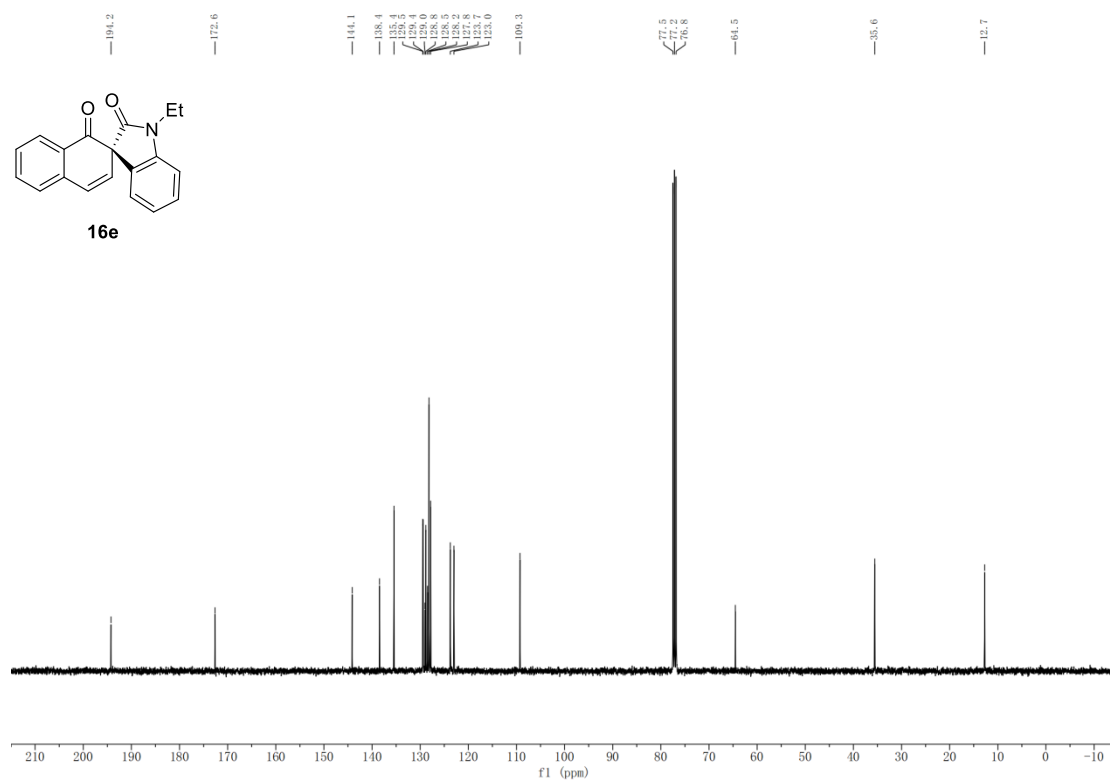

**Supplementary Figure 164.**  $^{13}\text{C}$  NMR Spectrum of **16e** (100 MHz,  $\text{CDCl}_3$ )

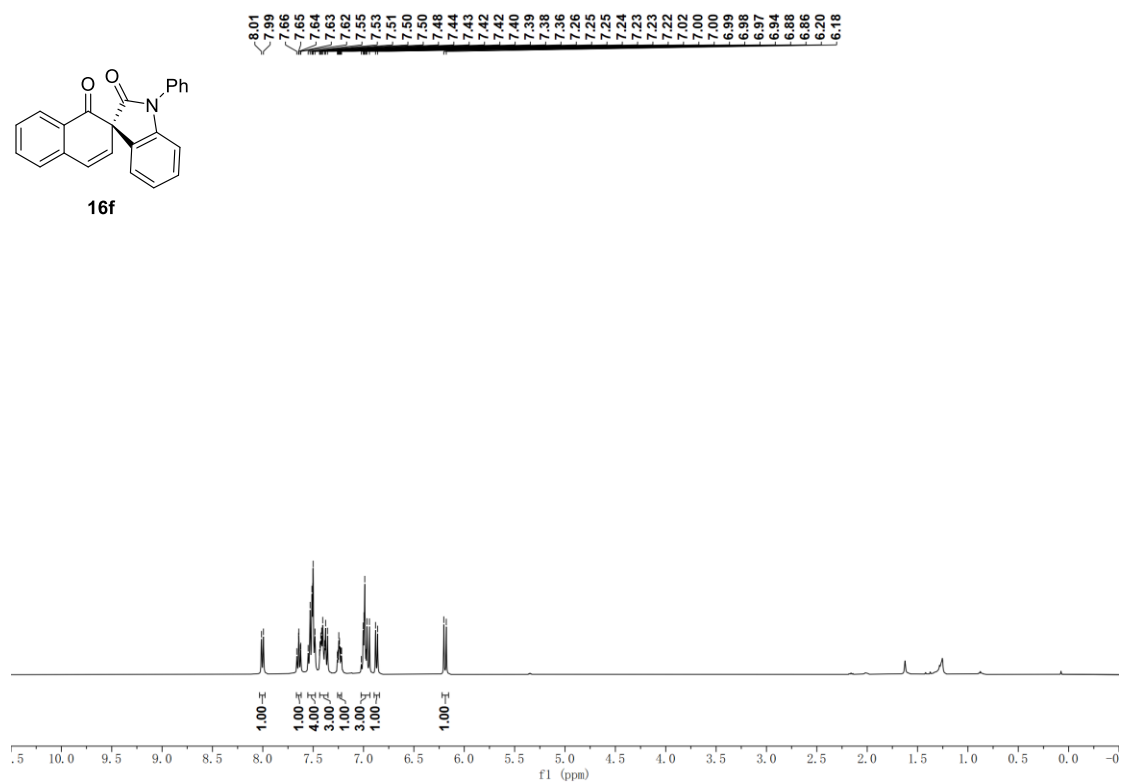

**Supplementary Figure 165.** <sup>1</sup>H NMR Spectrum of **16f** (400 MHz, CDCl<sub>3</sub>)

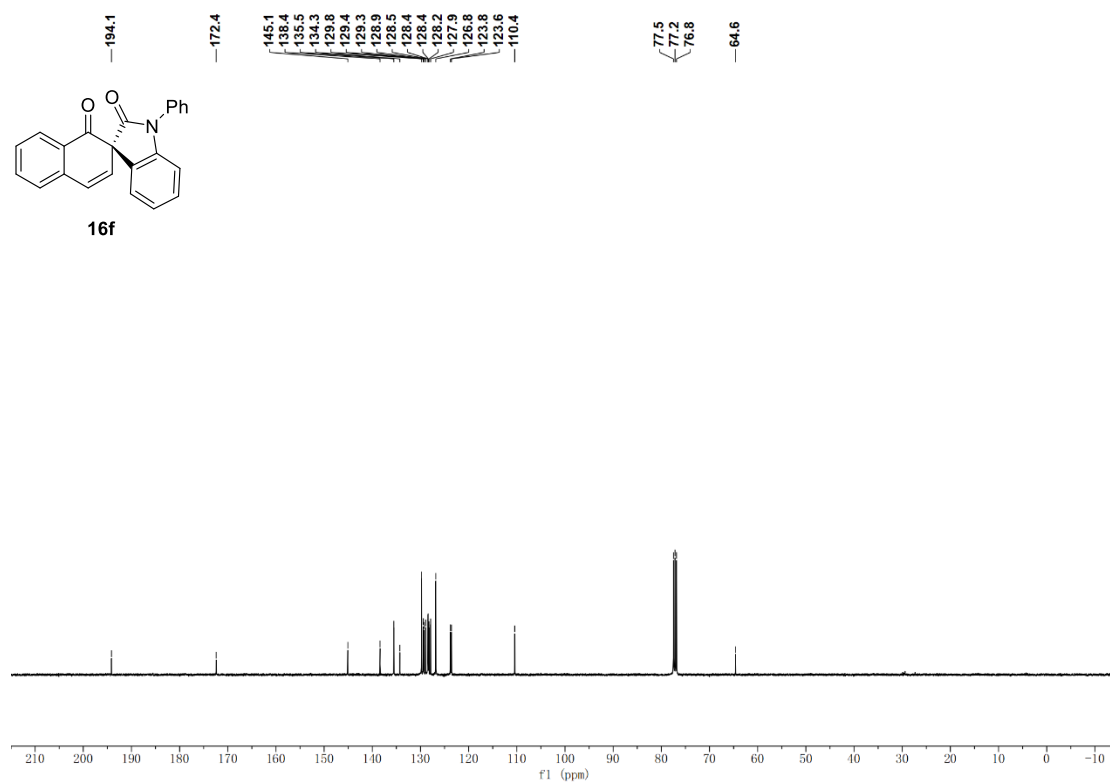

**Supplementary Figure 166.** <sup>13</sup>C NMR Spectrum of **16f** (100 MHz, CDCl<sub>3</sub>)



### 12.2.3 Spectrum of direct C(sp<sup>2</sup>)-H/C(sp<sup>3</sup>)-H cross-coupling

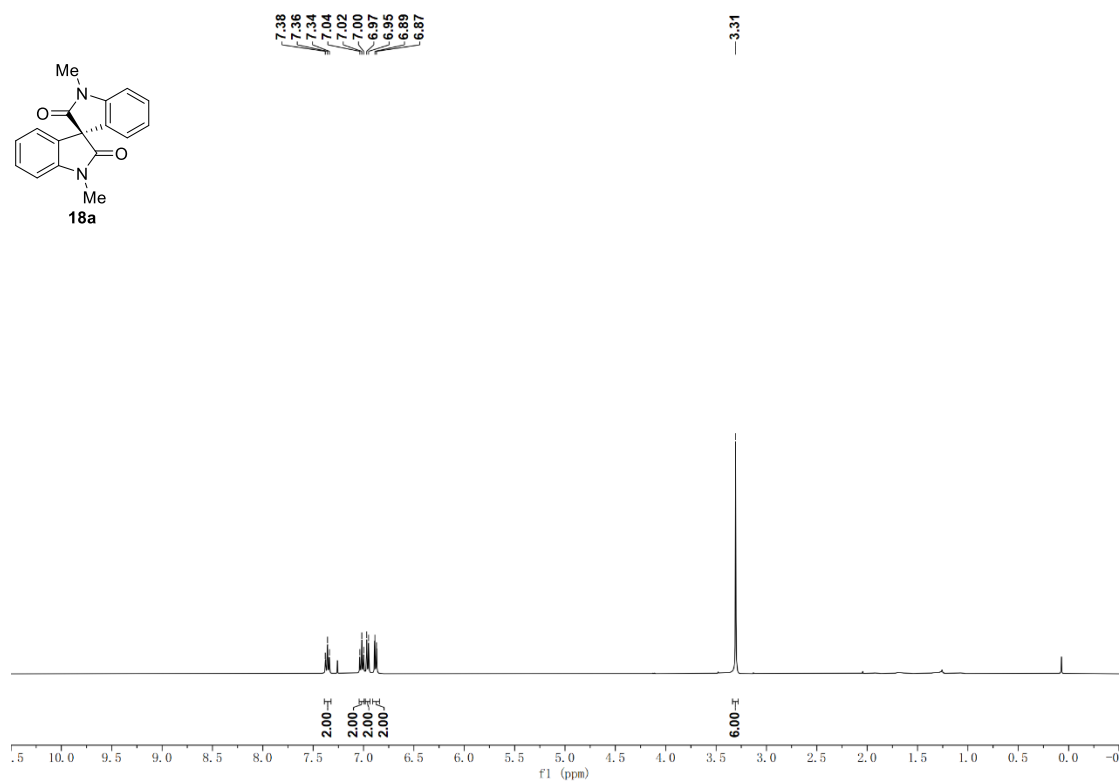

Supplementary Figure 167. <sup>1</sup>H NMR Spectrum of **18a** (400 MHz, CDCl<sub>3</sub>)

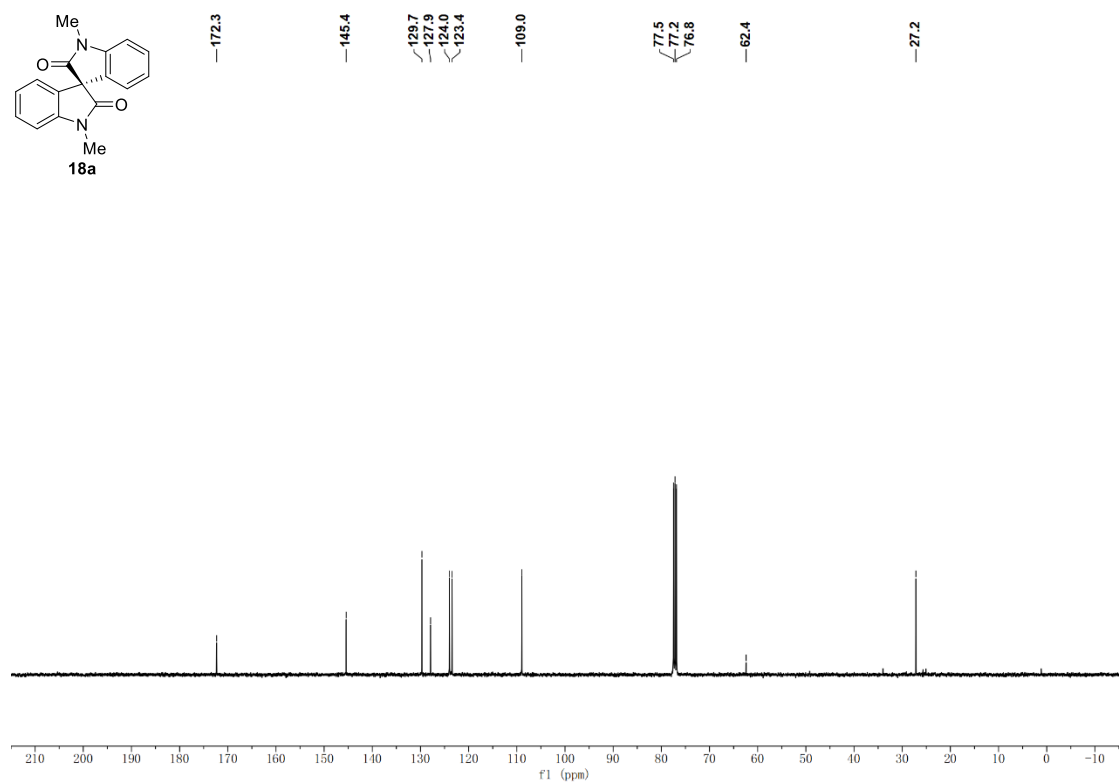

Supplementary Figure 168. <sup>13</sup>C NMR Spectrum of **18a** (100 MHz, CDCl<sub>3</sub>)

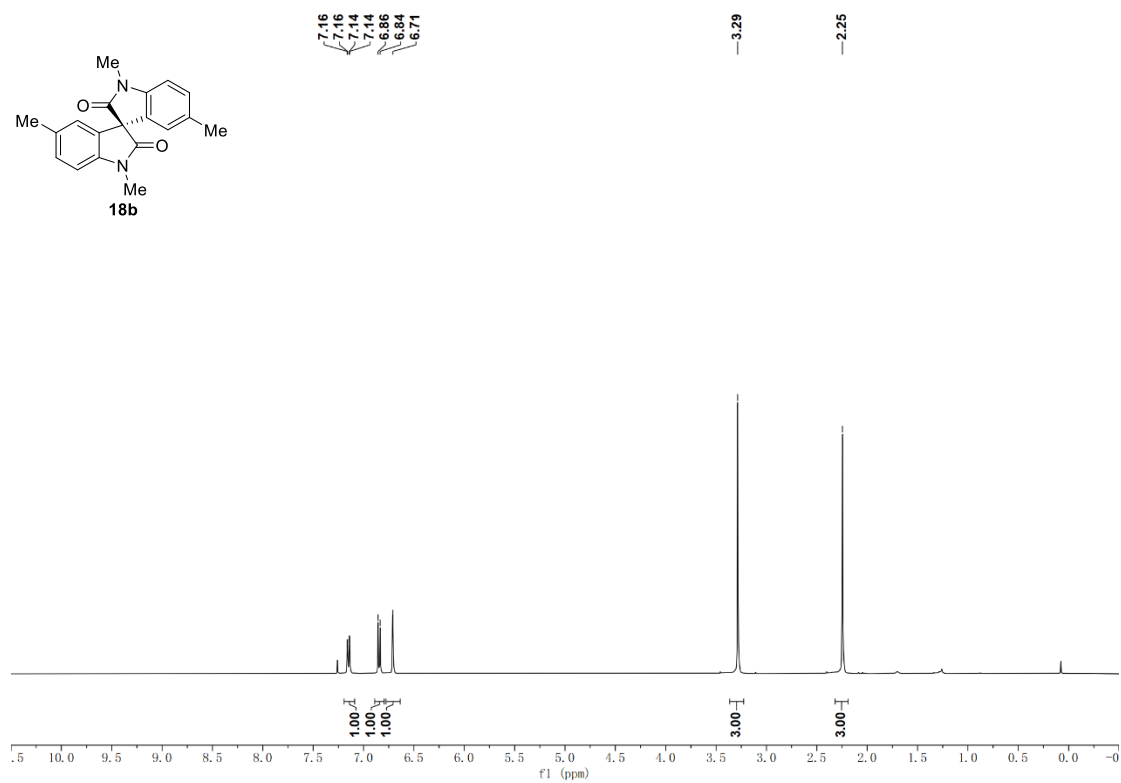

**Supplementary Figure 169.**  $^1\text{H}$  NMR Spectrum of **18b** (400 MHz,  $\text{CDCl}_3$ )

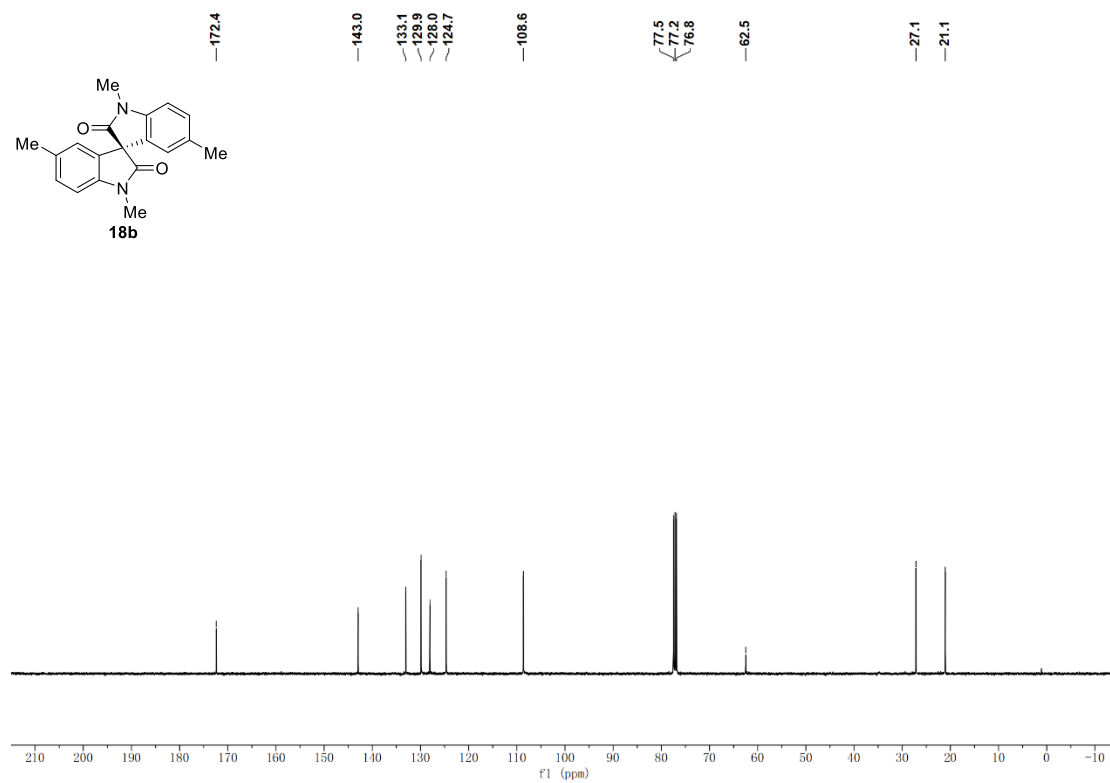

**Supplementary Figure 170.**  $^{13}\text{C}$  NMR Spectrum of **18b** (100 MHz,  $\text{CDCl}_3$ )

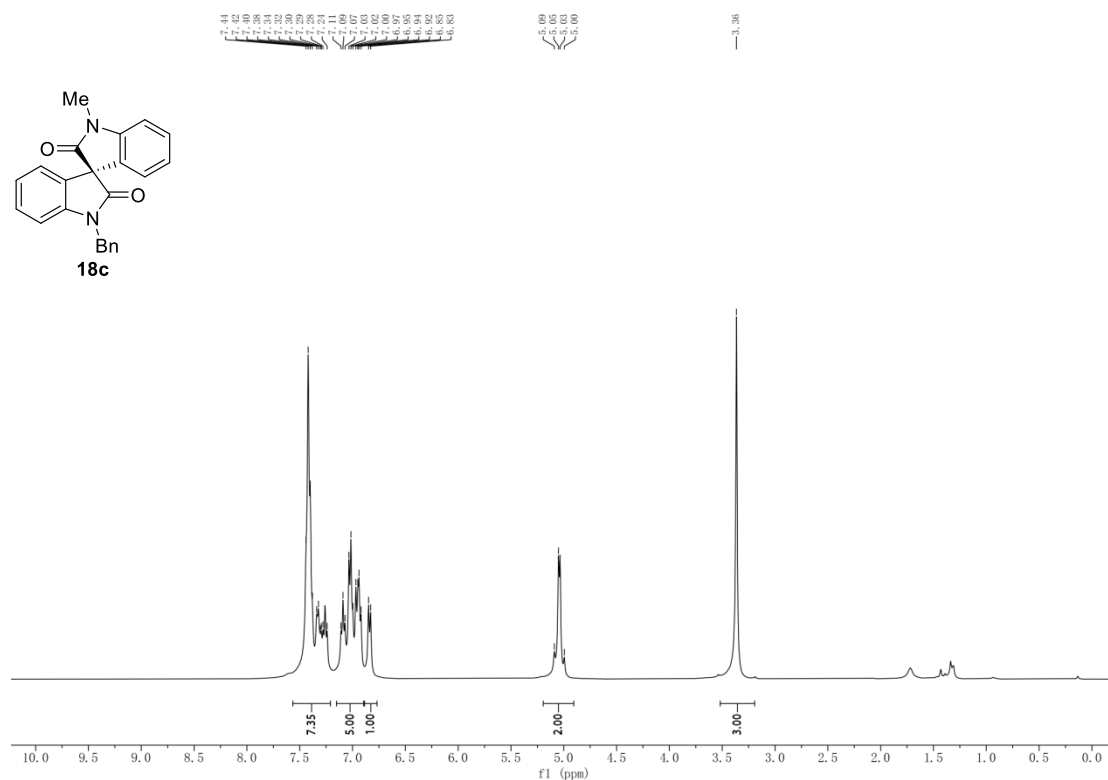

**Supplementary Figure 171.** <sup>1</sup>H NMR Spectrum of **18c** (400 MHz, CDCl<sub>3</sub>)

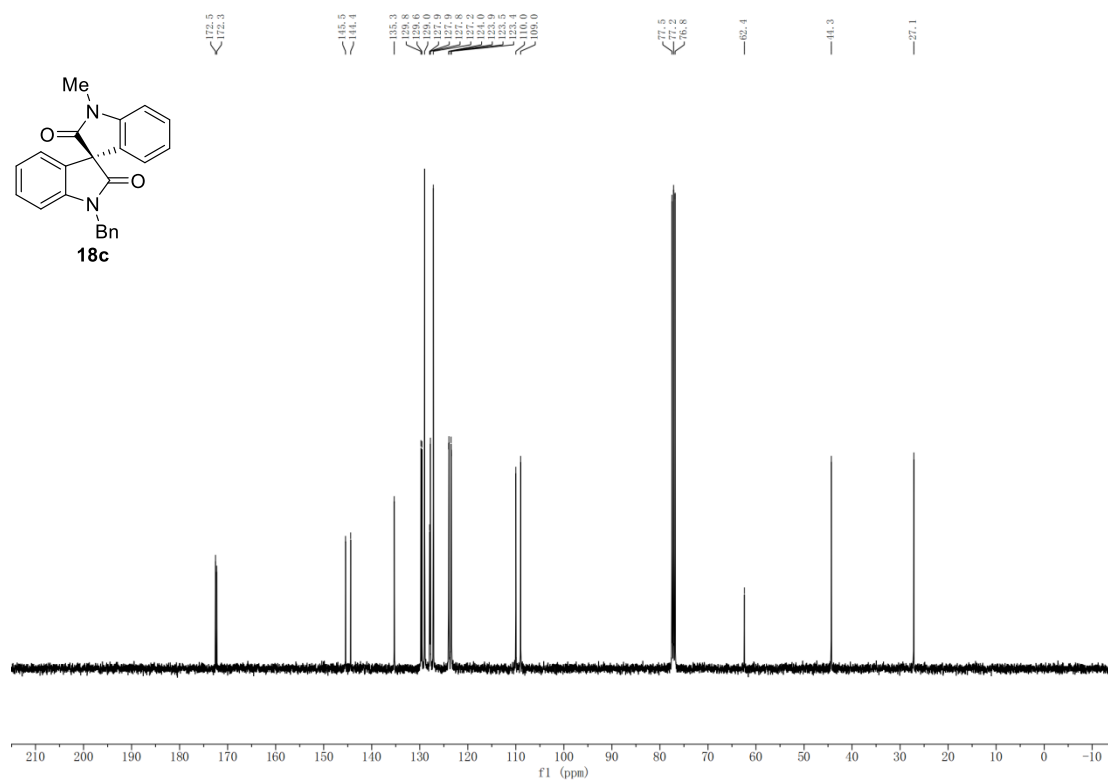

**Supplementary Figure 172.** <sup>13</sup>C NMR Spectrum of **18c** (100 MHz, CDCl<sub>3</sub>)

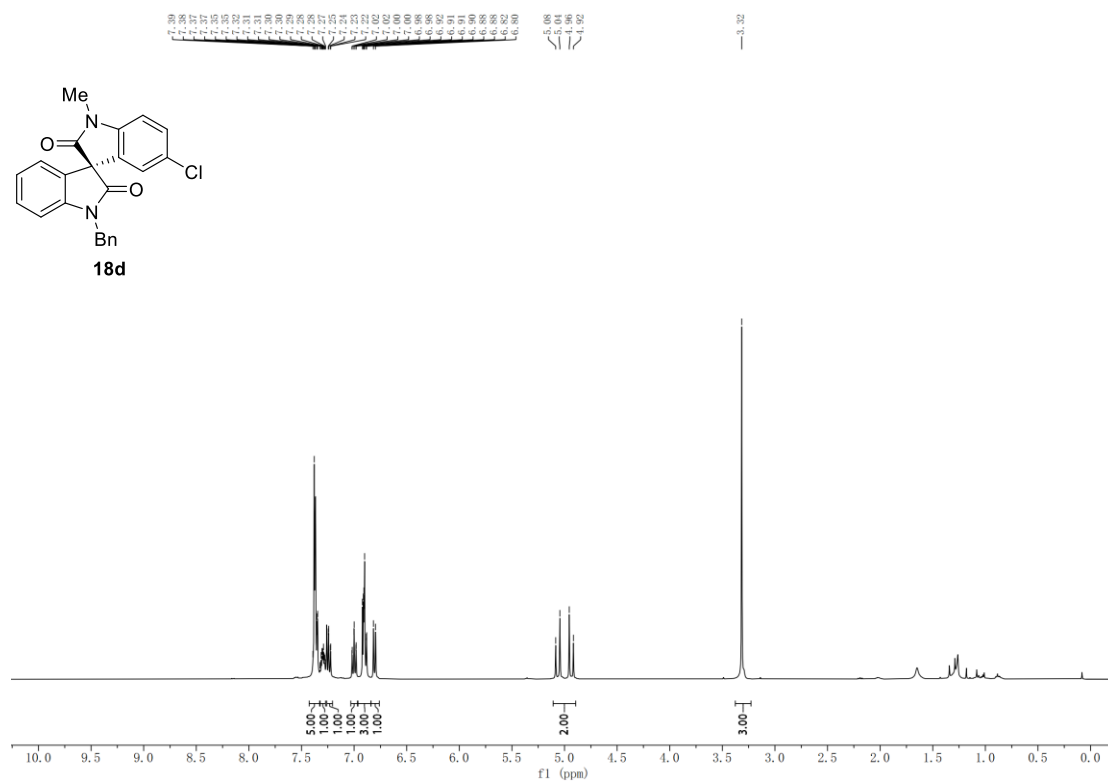

**Supplementary Figure 173.**  $^1\text{H}$  NMR Spectrum of **18d** (400 MHz,  $\text{CDCl}_3$ )

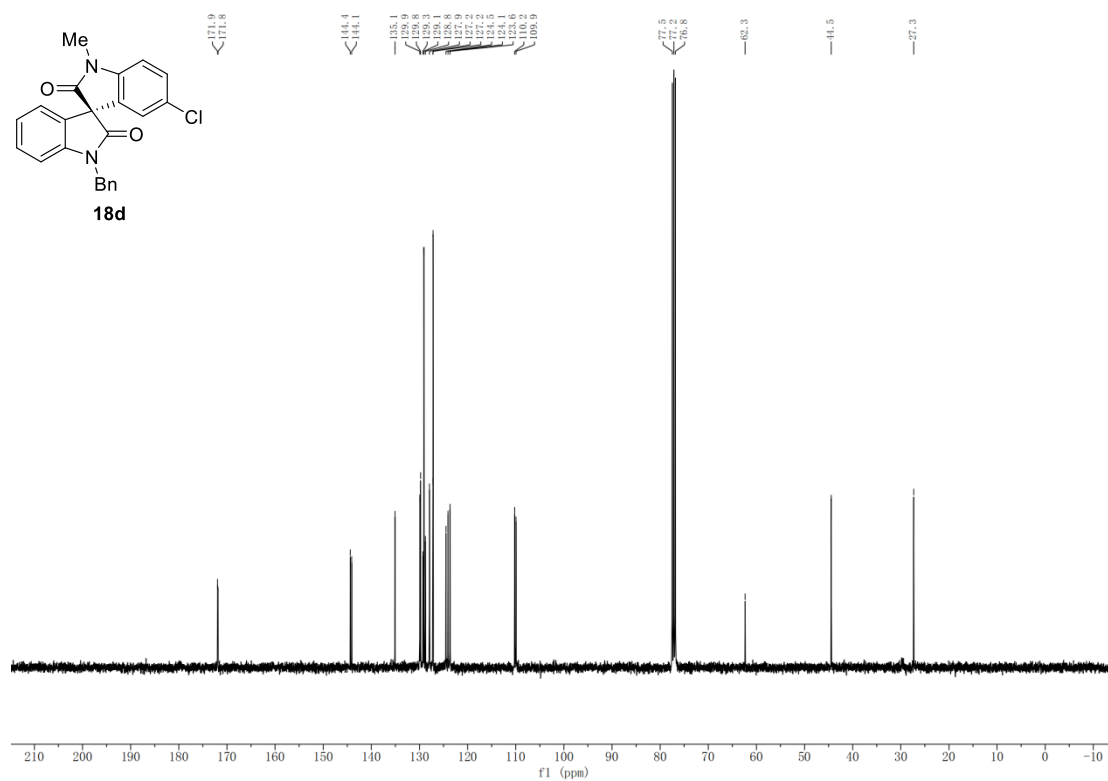

**Supplementary Figure 174.**  $^{13}\text{C}$  NMR Spectrum of **18d** (100 MHz,  $\text{CDCl}_3$ )

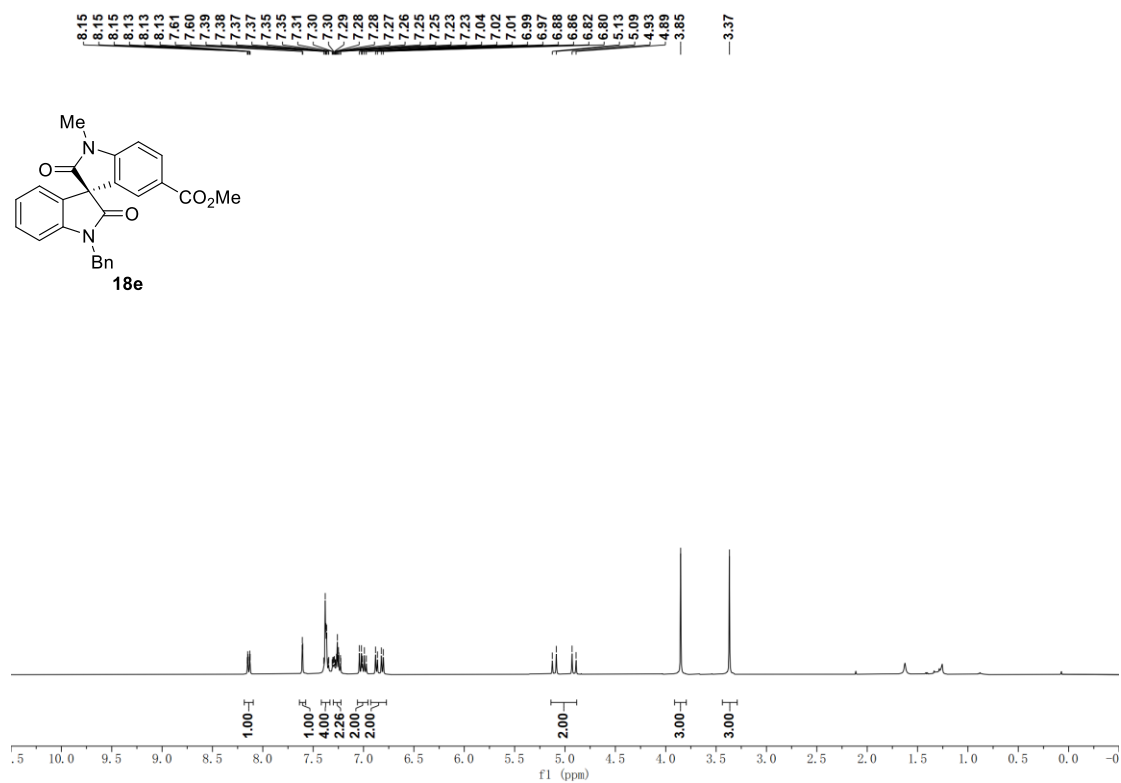

**Supplementary Figure 175.** <sup>1</sup>H NMR Spectrum of **18e** (400 MHz, CDCl<sub>3</sub>)

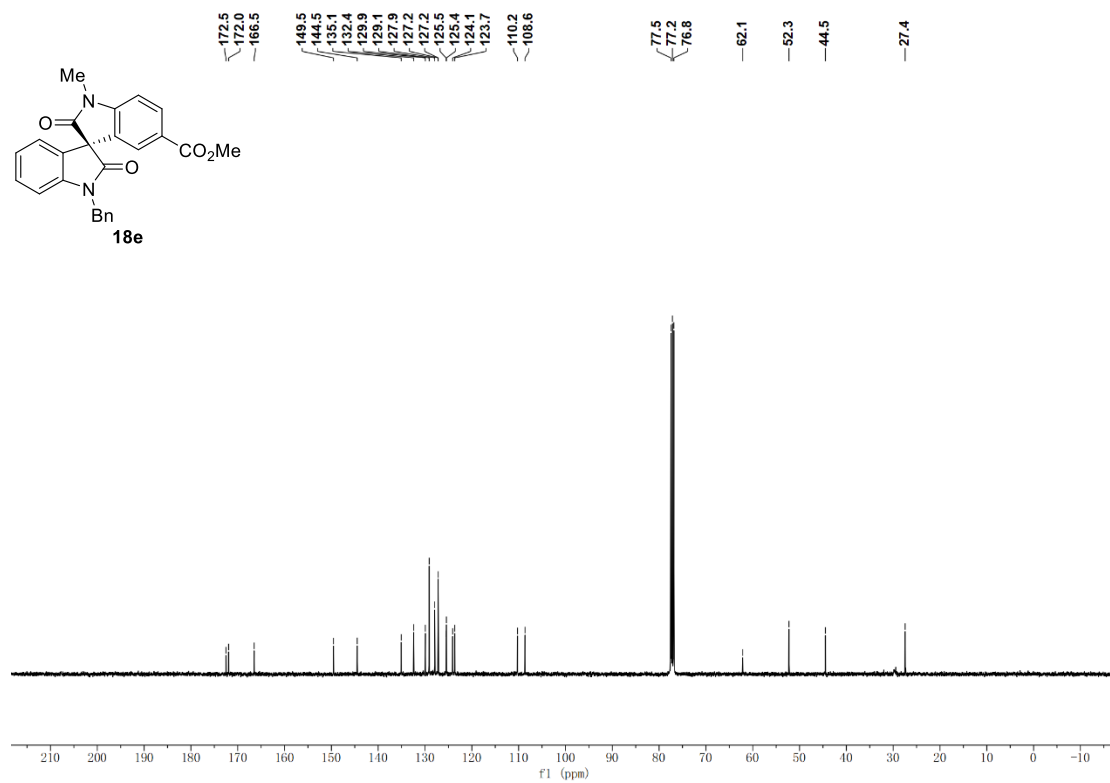

**Supplementary Figure 176.** <sup>13</sup>C NMR Spectrum of **18e** (100 MHz, CDCl<sub>3</sub>)

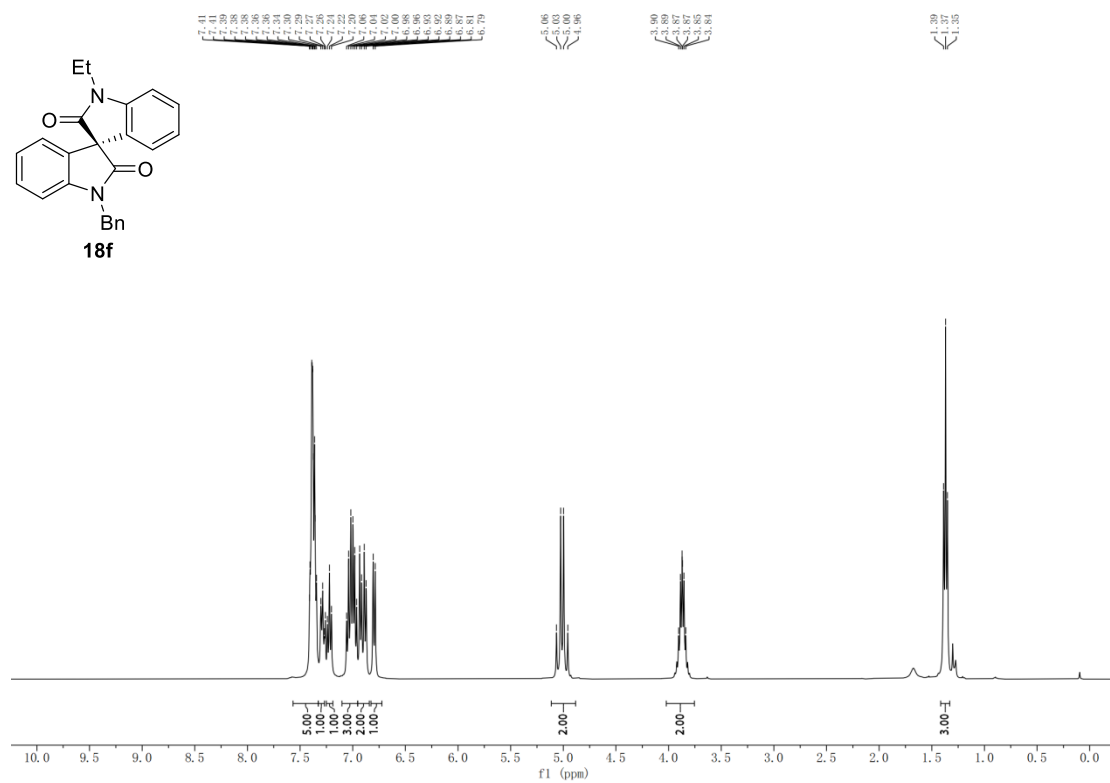

Supplementary Figure 177.  $^1\text{H}$  NMR Spectrum of **18f** (400 MHz,  $\text{CDCl}_3$ )

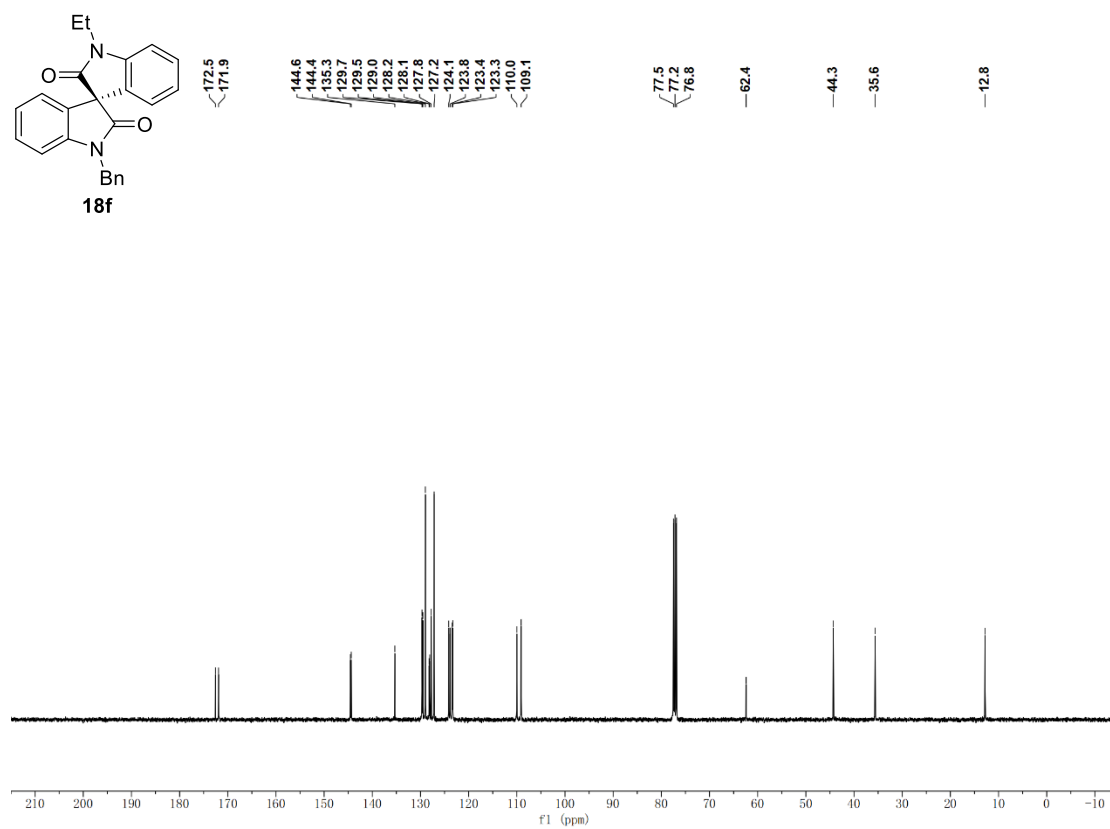

Supplementary Figure 178.  $^{13}\text{C}$  NMR Spectrum of **18f** (100 MHz,  $\text{CDCl}_3$ )

## 12.2.4 Spectrum of oxidative fluorination of keto esters

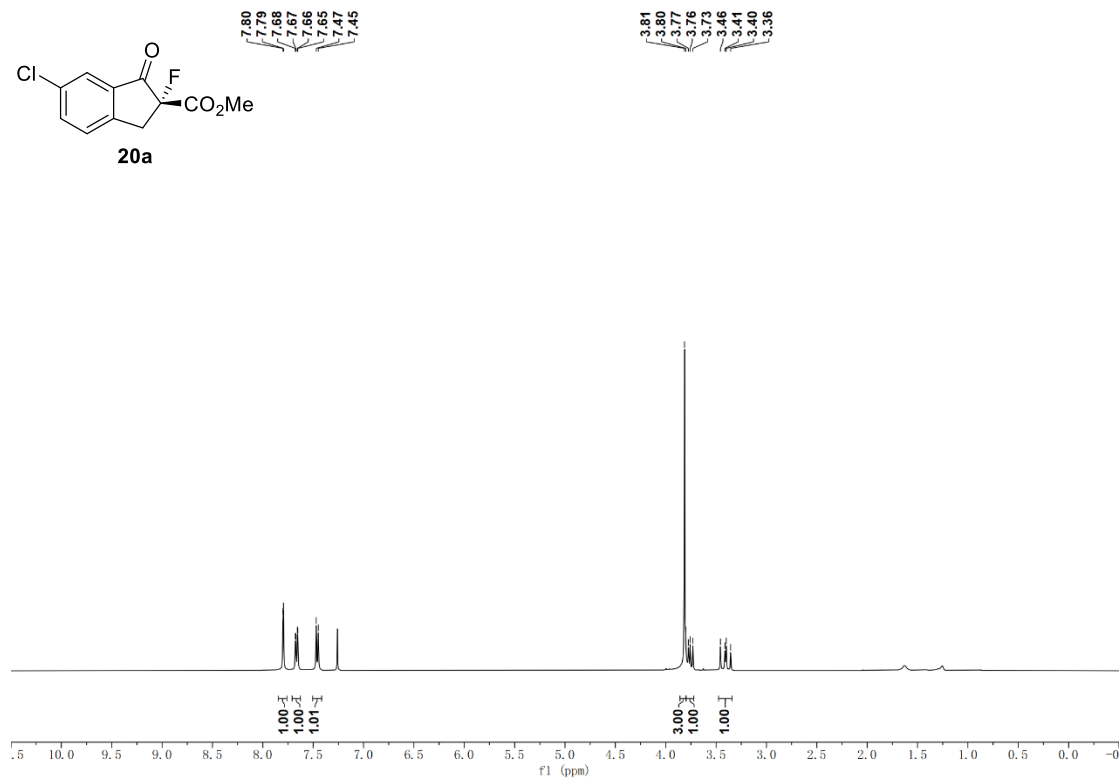

**Supplementary Figure 179. <sup>1</sup>H NMR Spectrum of 20a (400 MHz, CDCl<sub>3</sub>)**

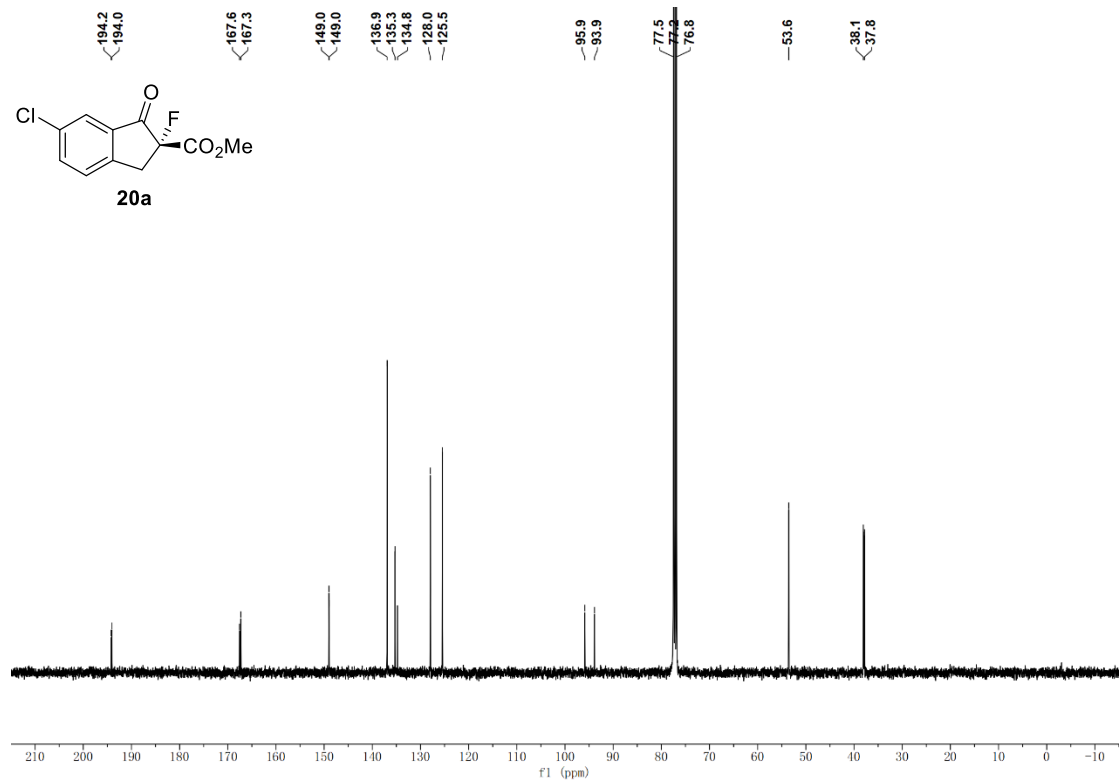

**Supplementary Figure 180. <sup>13</sup>C NMR Spectrum of 20a (100 MHz, CDCl<sub>3</sub>)**

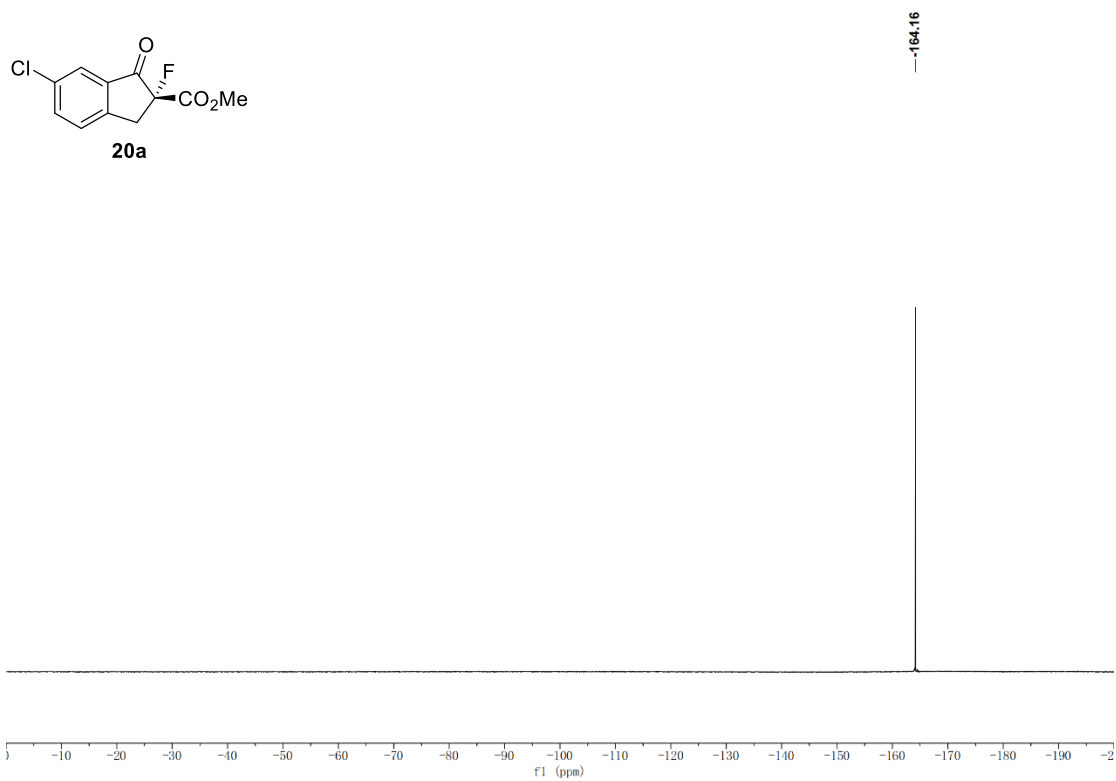

**Supplementary Figure 181.**  $^{19}\text{F}$  NMR Spectrum of **20a** (376 MHz,  $\text{CDCl}_3$ )

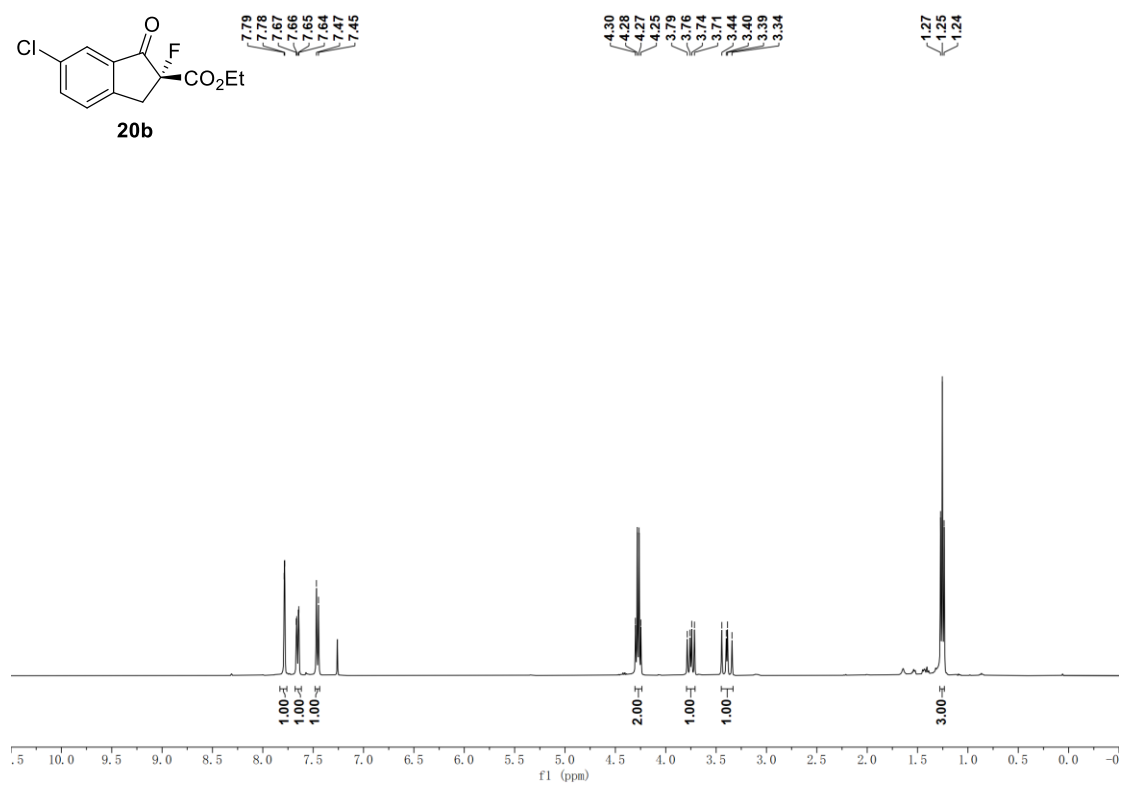

**Supplementary Figure 182.**  $^1\text{H}$  NMR Spectrum of **20b** (400 MHz,  $\text{CDCl}_3$ )



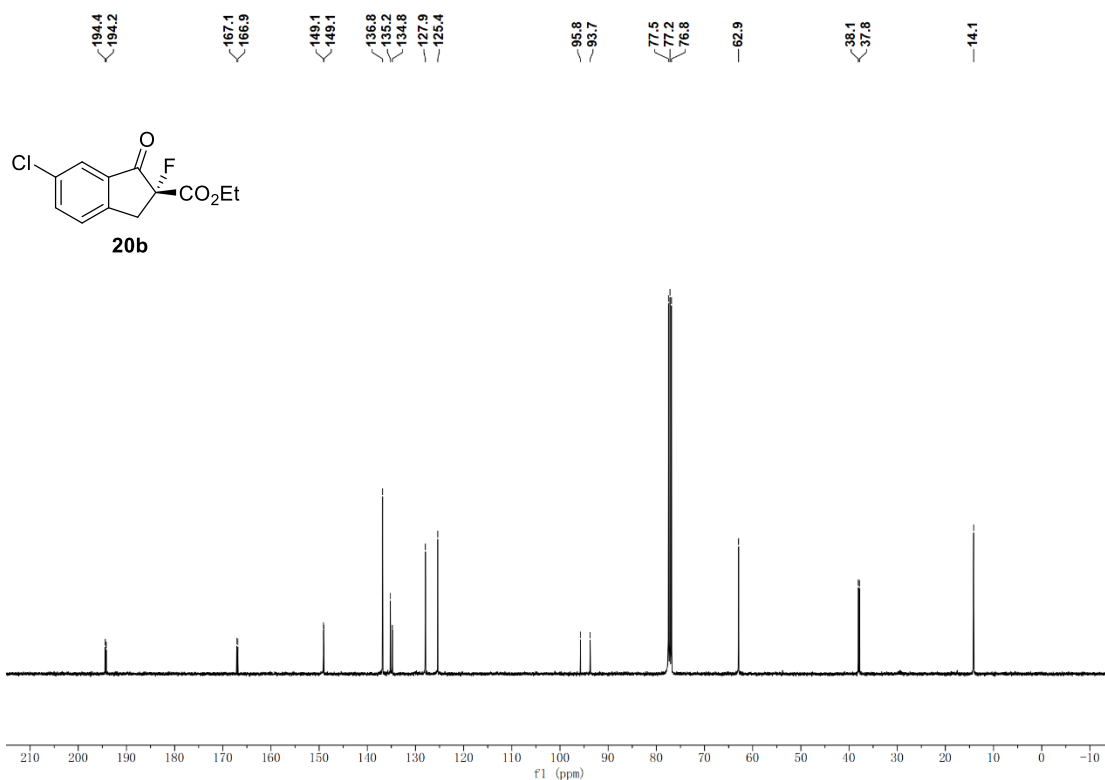

**Supplementary Figure 183.**  $^{13}\text{C}$  NMR Spectrum of **20b** (100 MHz,  $\text{CDCl}_3$ )

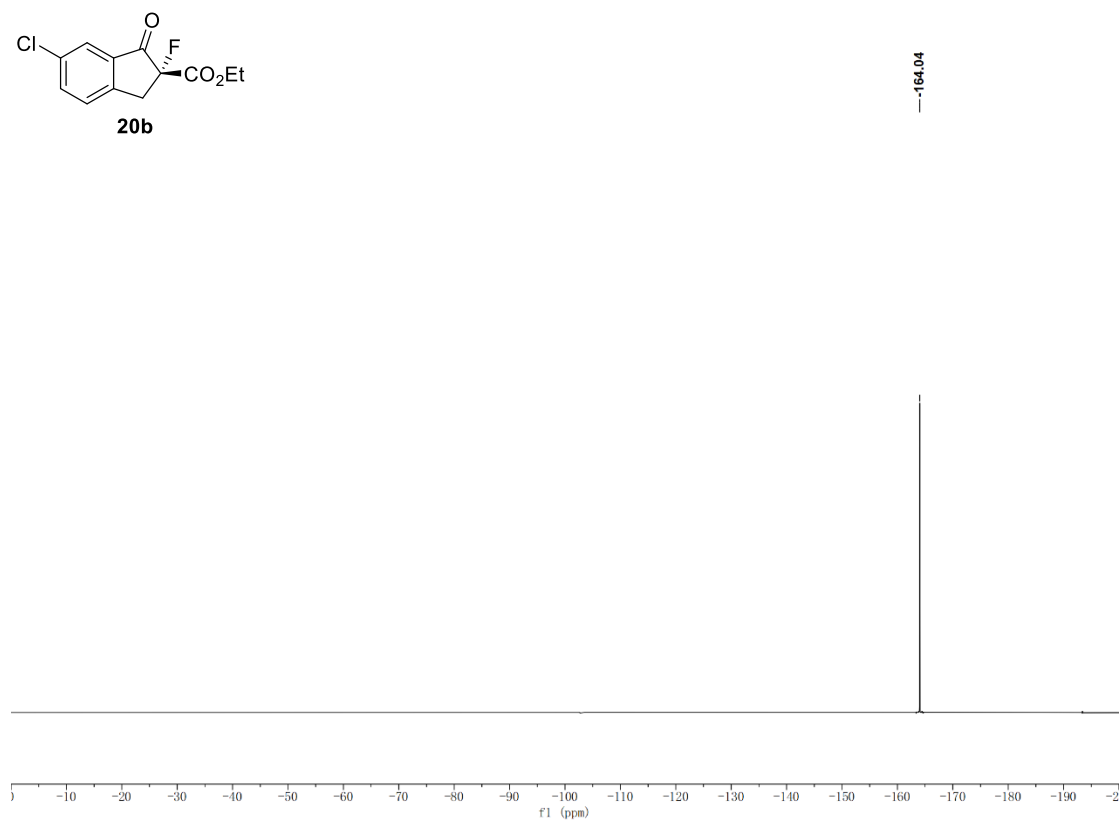

**Supplementary Figure 184.**  $^{19}\text{F}$  NMR Spectrum of **20b** (376 MHz,  $\text{CDCl}_3$ )

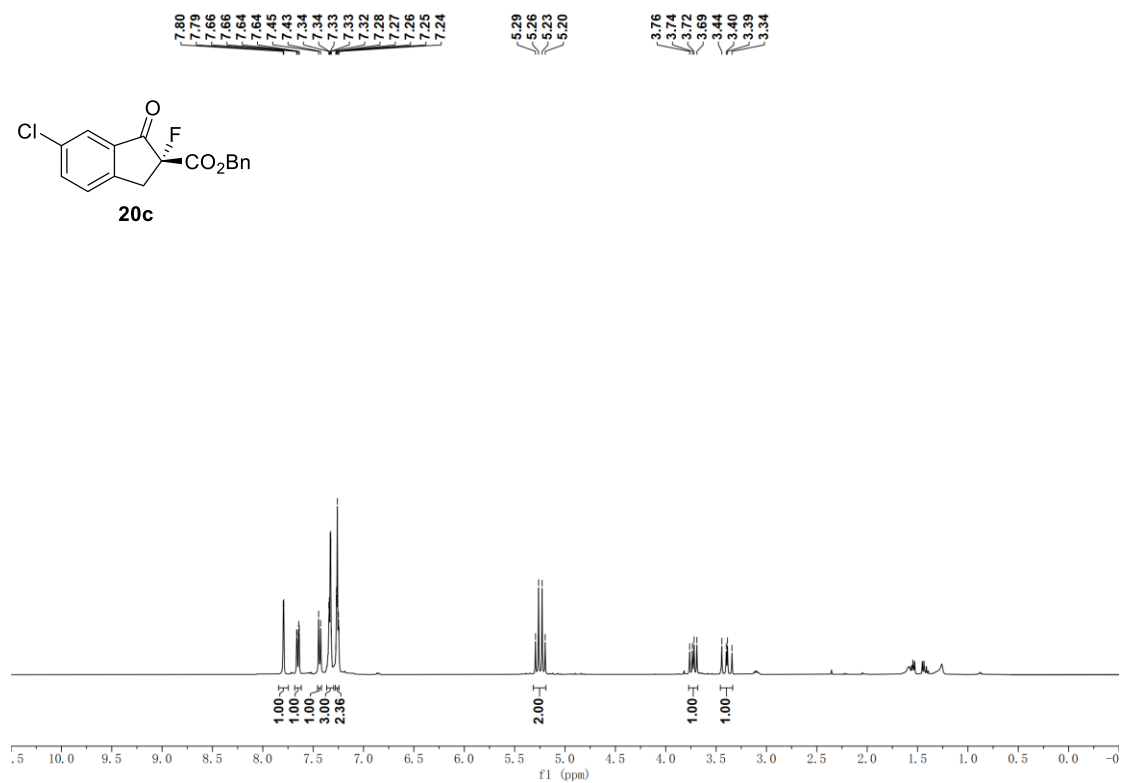

Supplementary Figure 185.  $^1\text{H}$  NMR Spectrum of **20c** (400 MHz,  $\text{CDCl}_3$ )

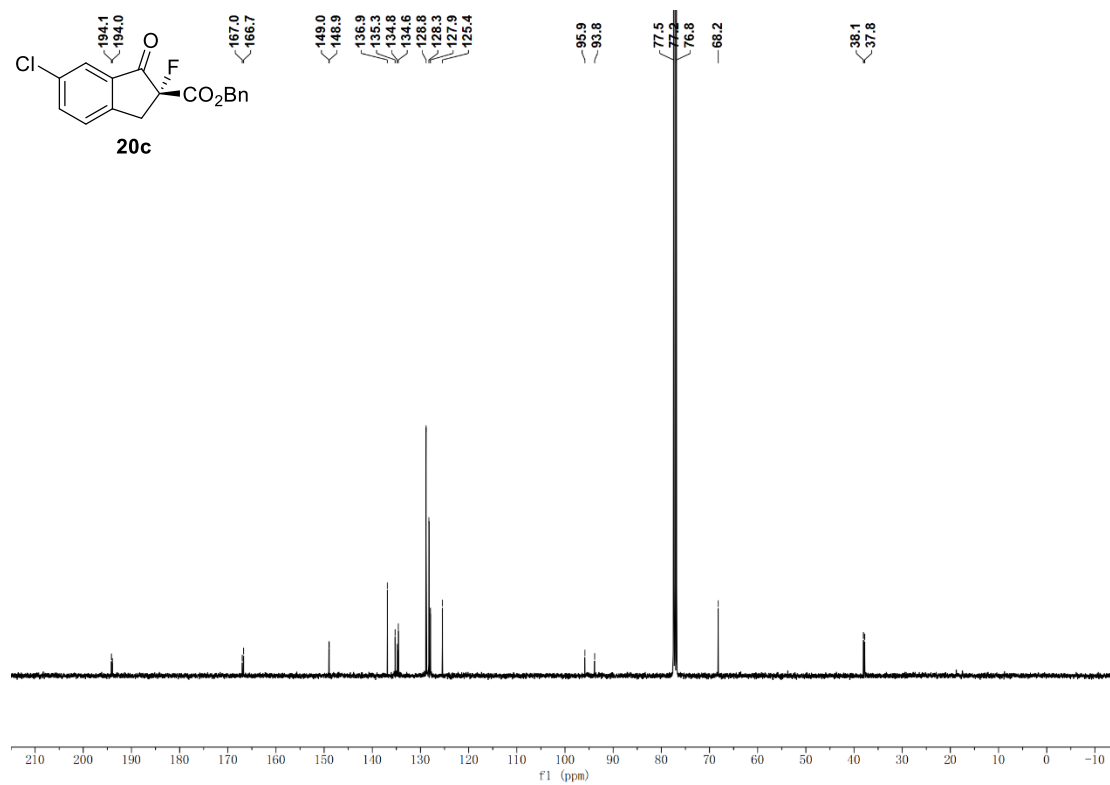

Supplementary Figure 186.  $^{13}\text{C}$  NMR Spectrum of **20c** (100 MHz,  $\text{CDCl}_3$ )

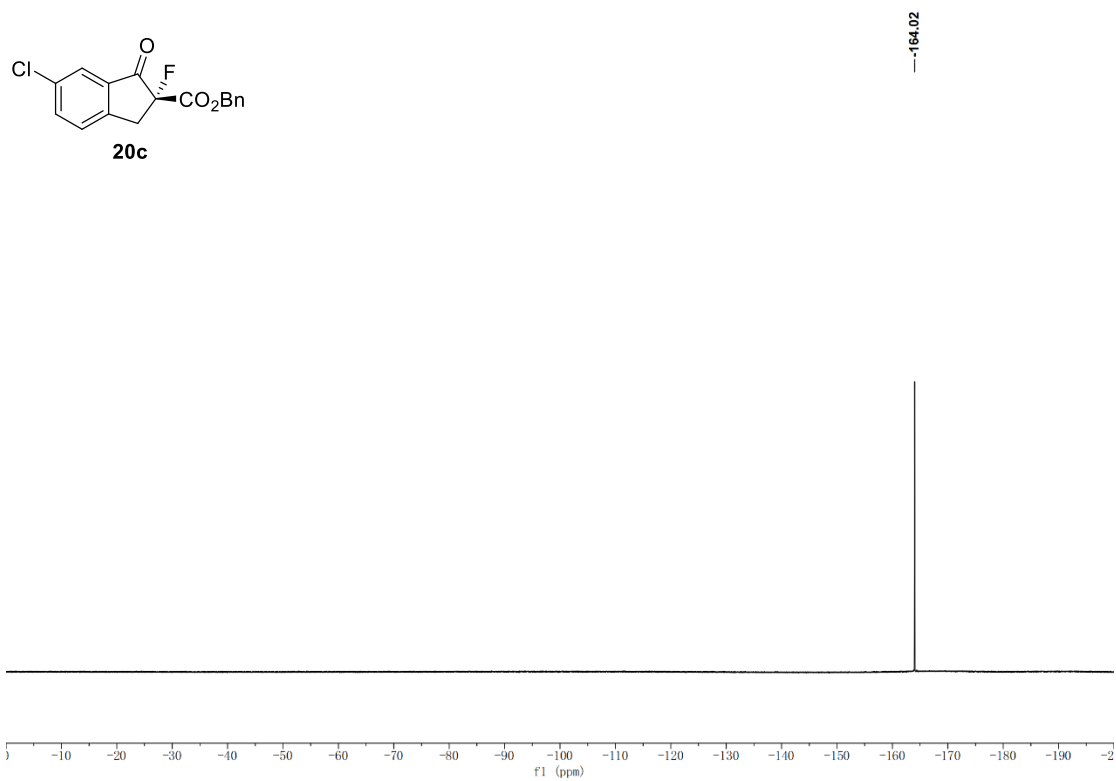

**Supplementary Figure 187.**  $^{19}\text{F}$  NMR Spectrum of **20c** (376 MHz,  $\text{CDCl}_3$ )

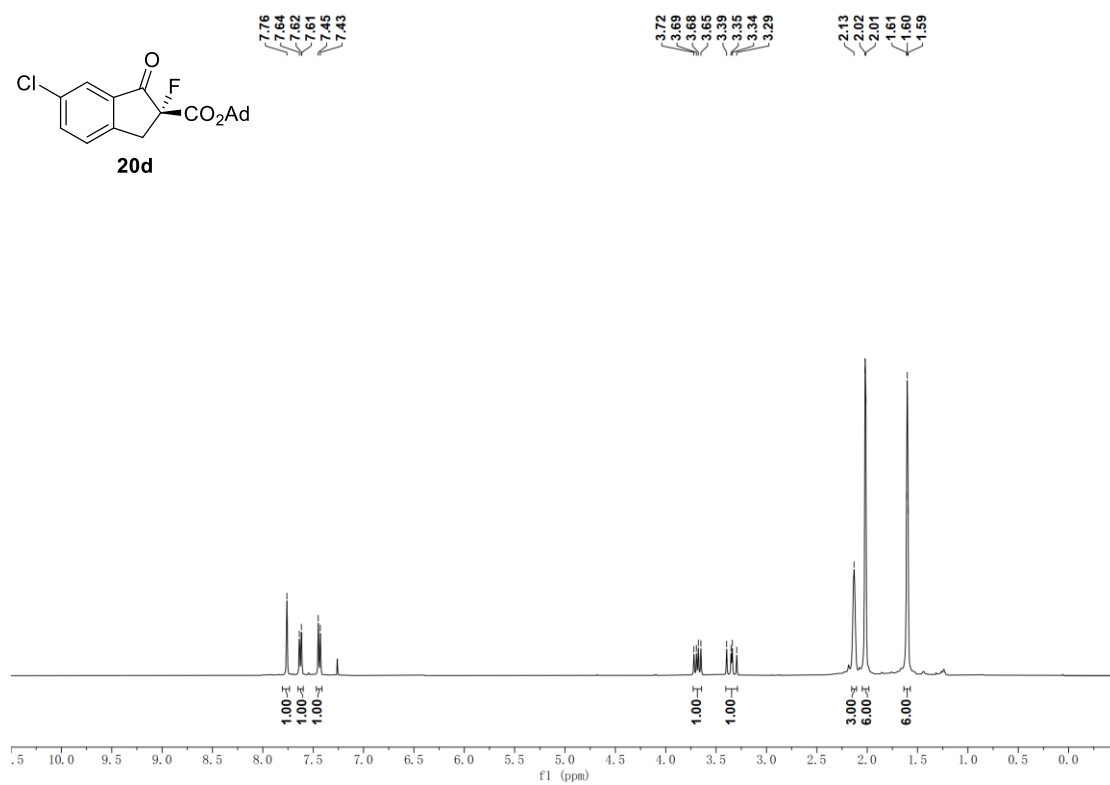

**Supplementary Figure 188.**  $^1\text{H}$  NMR Spectrum of **20d** (400 MHz,  $\text{CDCl}_3$ )

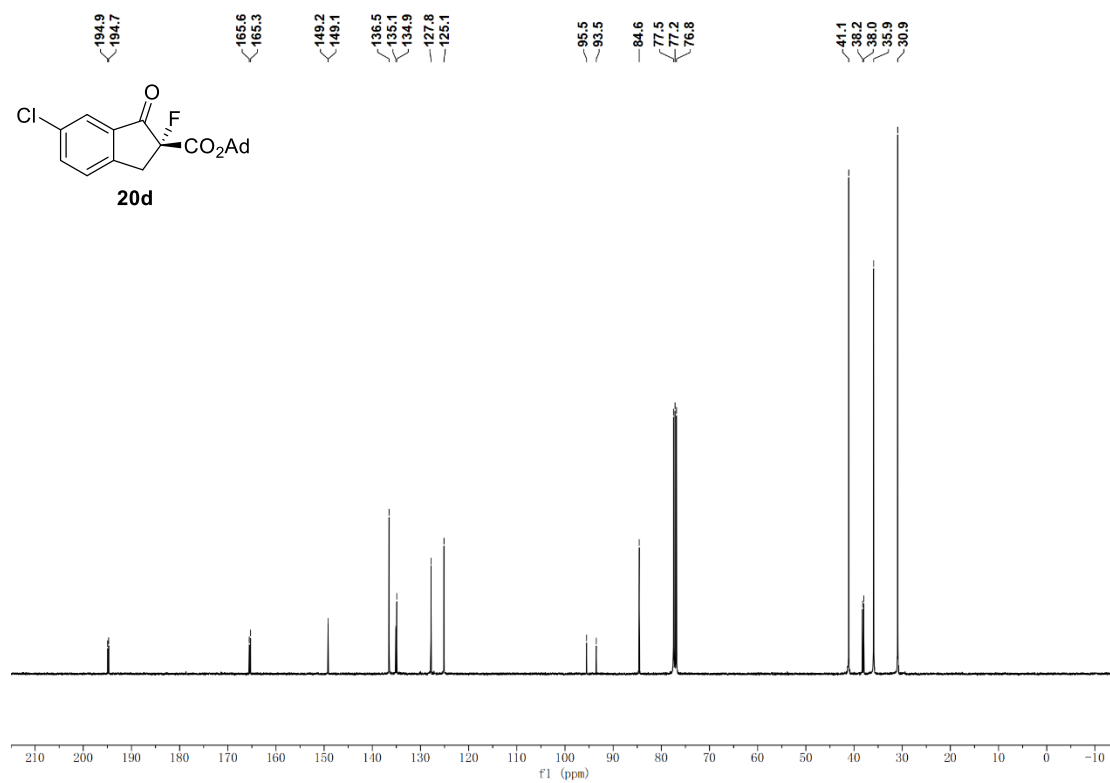

**Supplementary Figure 189.**  $^{13}\text{C}$  NMR Spectrum of **20d** (100 MHz,  $\text{CDCl}_3$ )

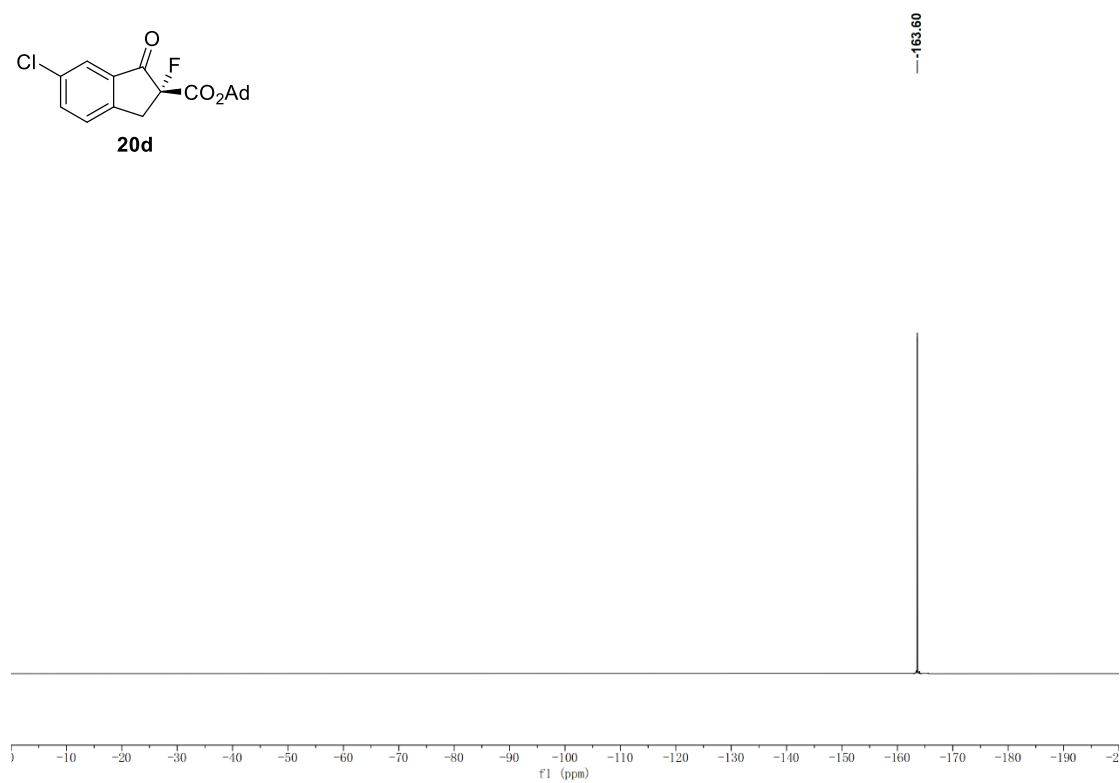

**Supplementary Figure 190.**  $^{19}\text{F}$  NMR Spectrum of **20d** (376 MHz,  $\text{CDCl}_3$ )

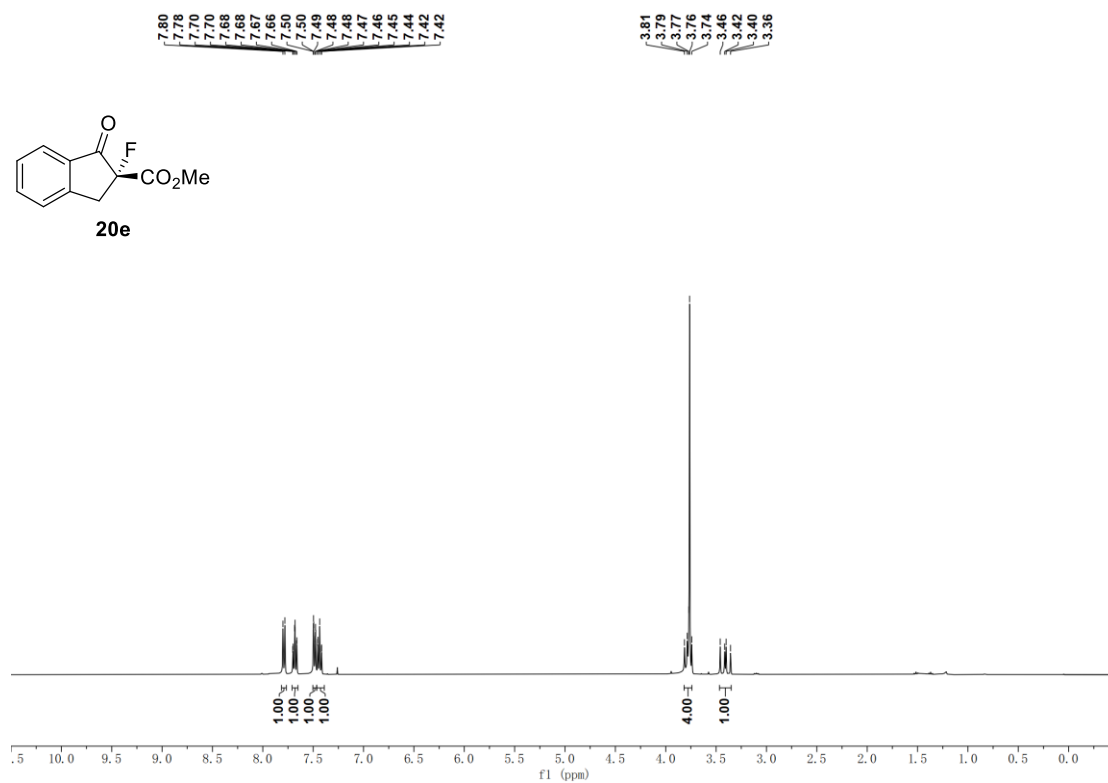

**Supplementary Figure 191.** <sup>1</sup>H NMR Spectrum of **20e** (400 MHz, CDCl<sub>3</sub>)

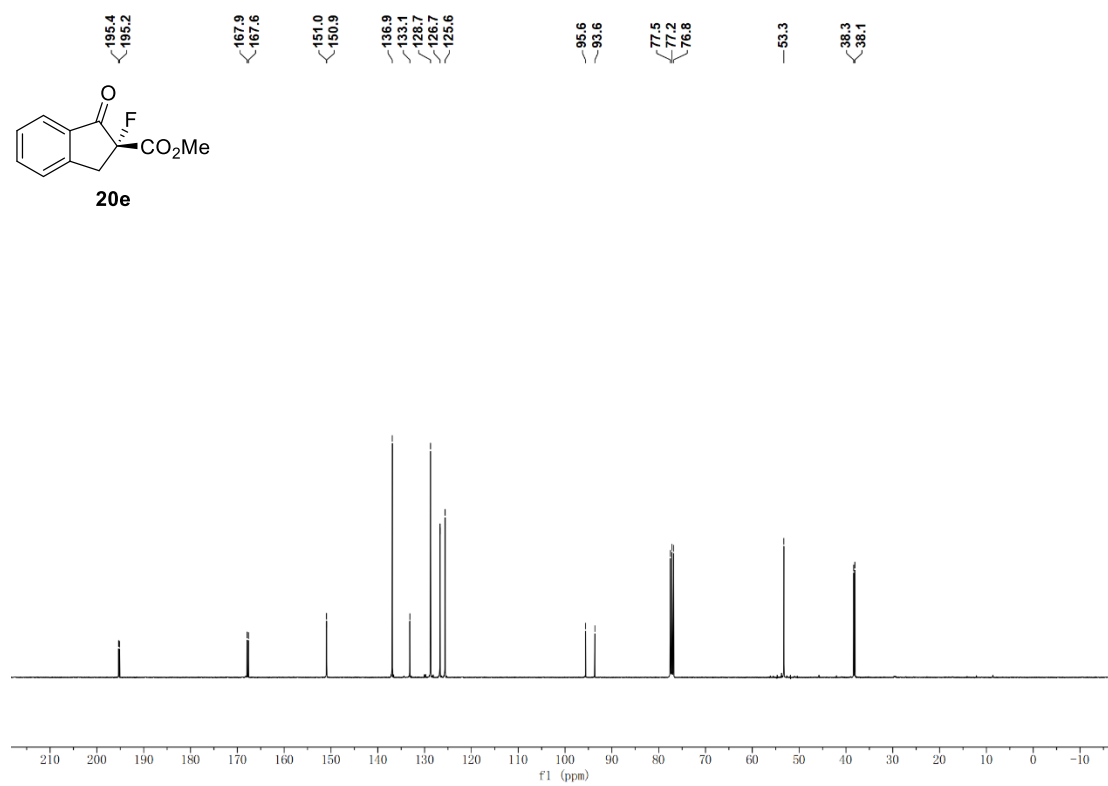

**Supplementary Figure 192.** <sup>13</sup>C NMR Spectrum of **20e** (100 MHz, CDCl<sub>3</sub>)

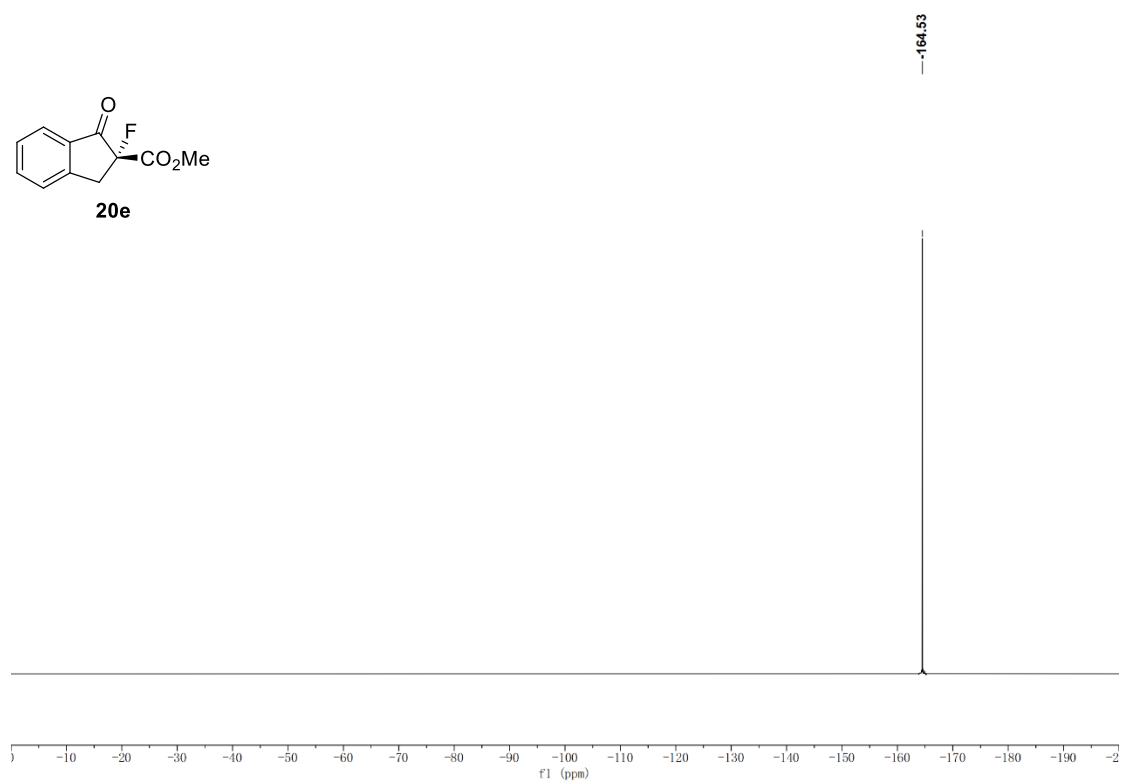

**Supplementary Figure 193.** <sup>19</sup>F NMR Spectrum of **20e** (376 MHz, CDCl<sub>3</sub>)

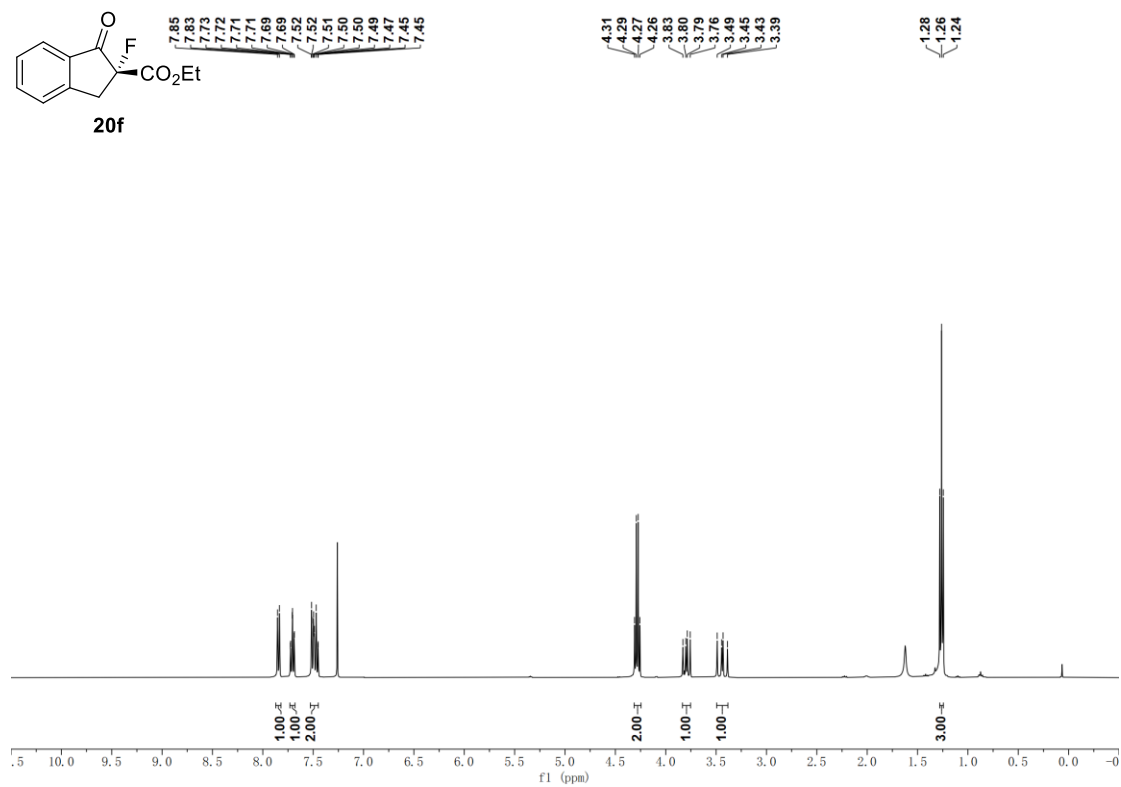

**Supplementary Figure 194.** <sup>1</sup>H NMR Spectrum of **20f** (400 MHz, CDCl<sub>3</sub>)

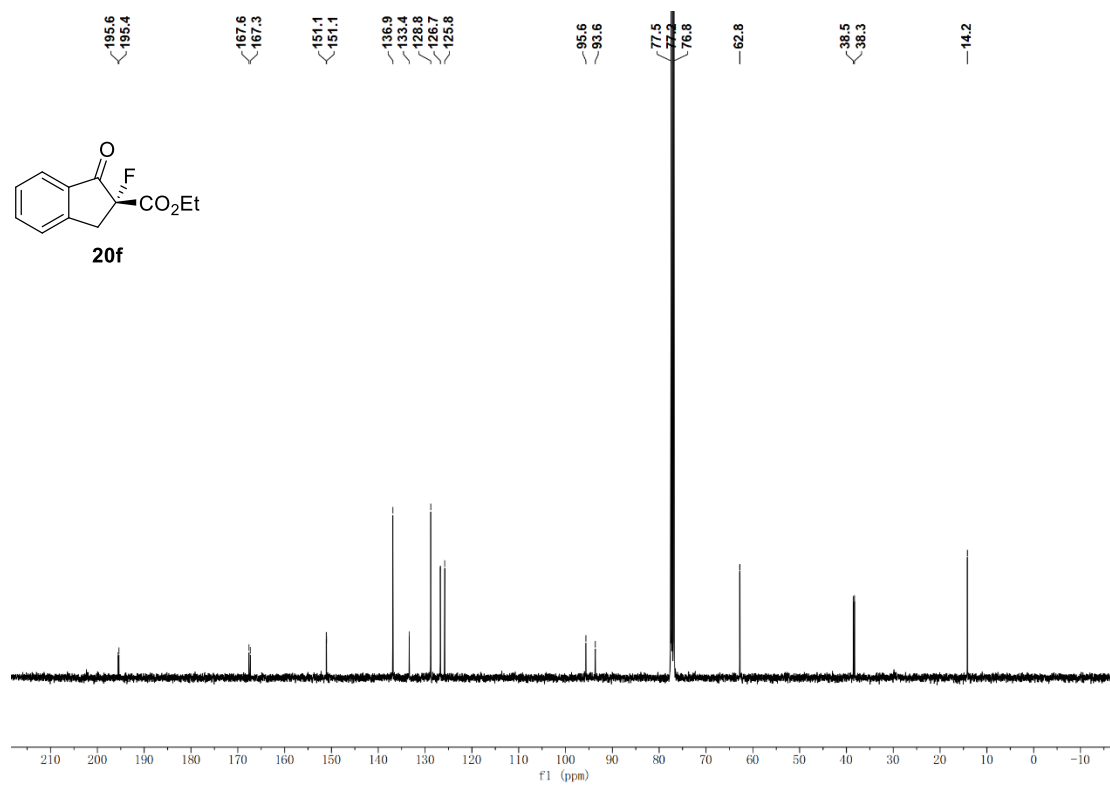

**Supplementary Figure 195.**  $^{13}\text{C}$  NMR Spectrum of **20f** (100 MHz,  $\text{CDCl}_3$ )

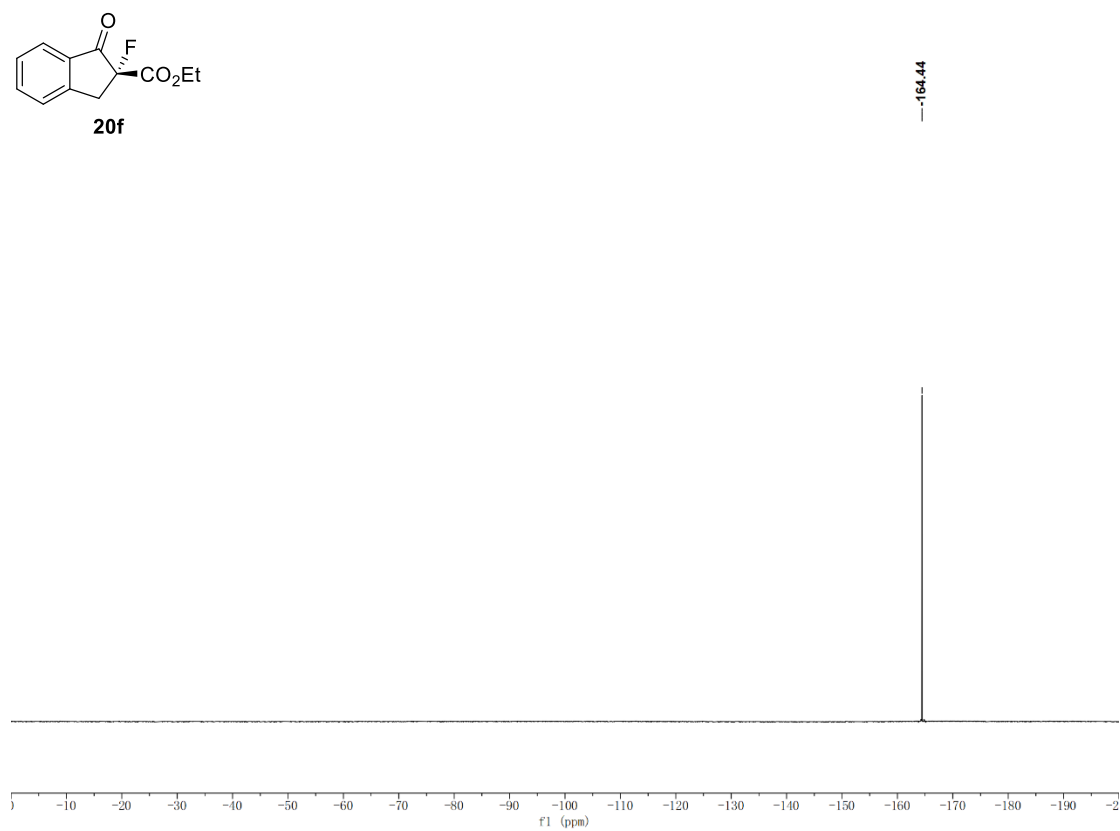

**Supplementary Figure 196.**  $^{19}\text{F}$  NMR Spectrum of **20f** (376 MHz,  $\text{CDCl}_3$ )

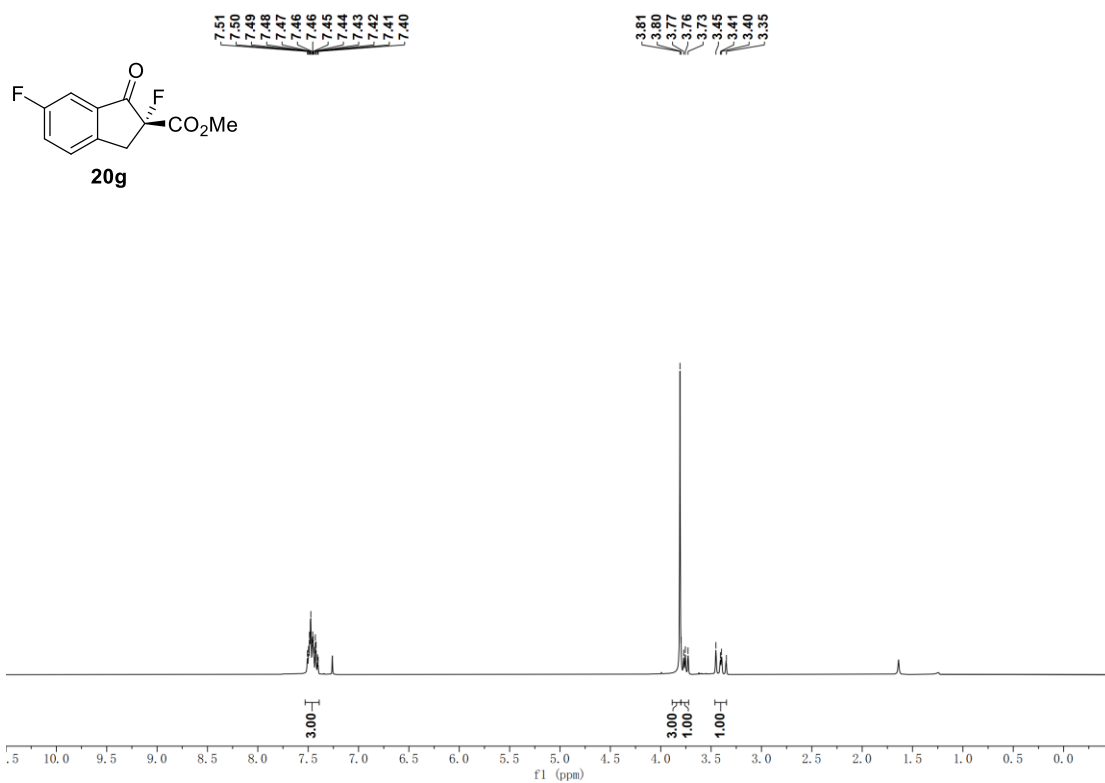

**Supplementary Figure 197.** <sup>1</sup>H NMR Spectrum of **20g** (400 MHz, CDCl<sub>3</sub>)

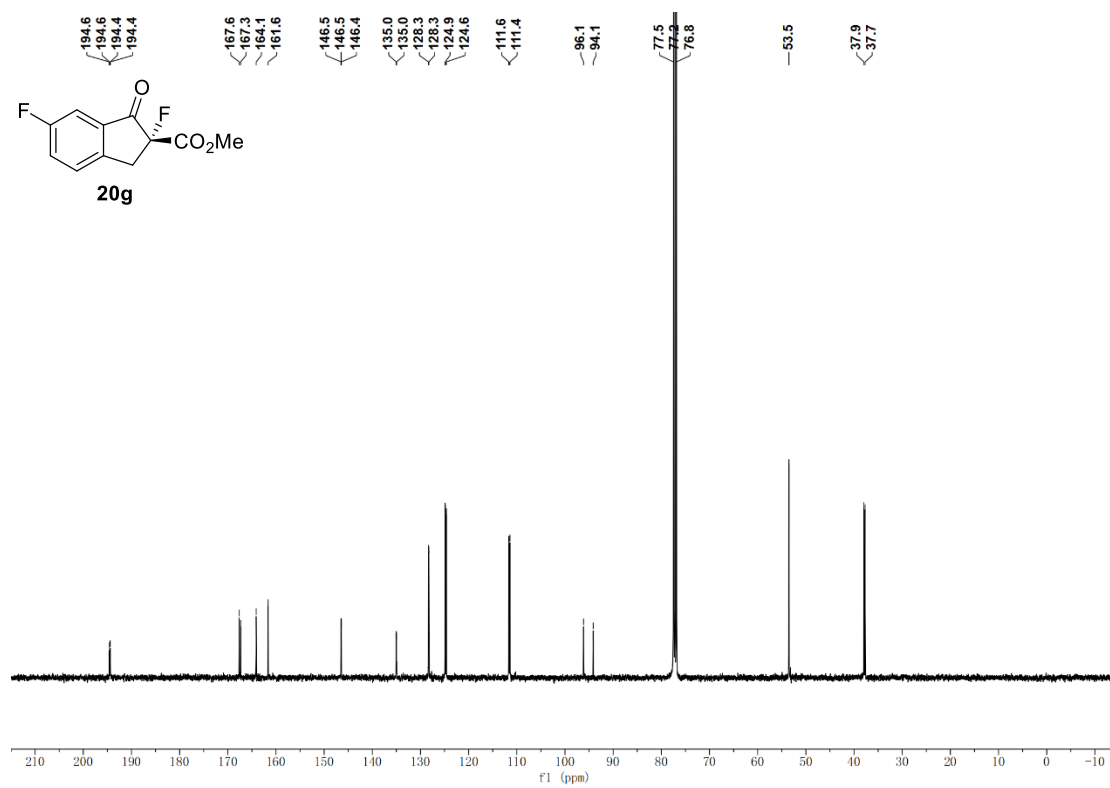

**Supplementary Figure 198.** <sup>13</sup>C NMR Spectrum of **20g** (100 MHz, CDCl<sub>3</sub>)



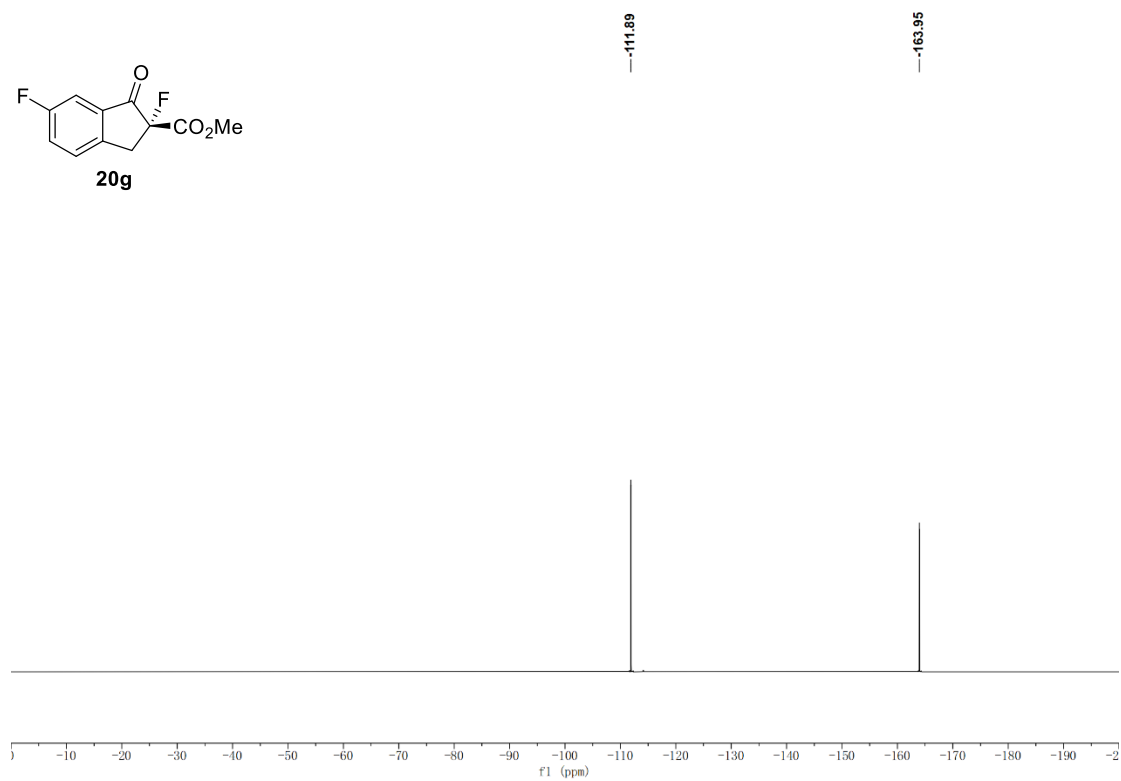

**Supplementary Figure 199.**  $^{19}\text{F}$  NMR Spectrum of **20g** (376 MHz,  $\text{CDCl}_3$ )

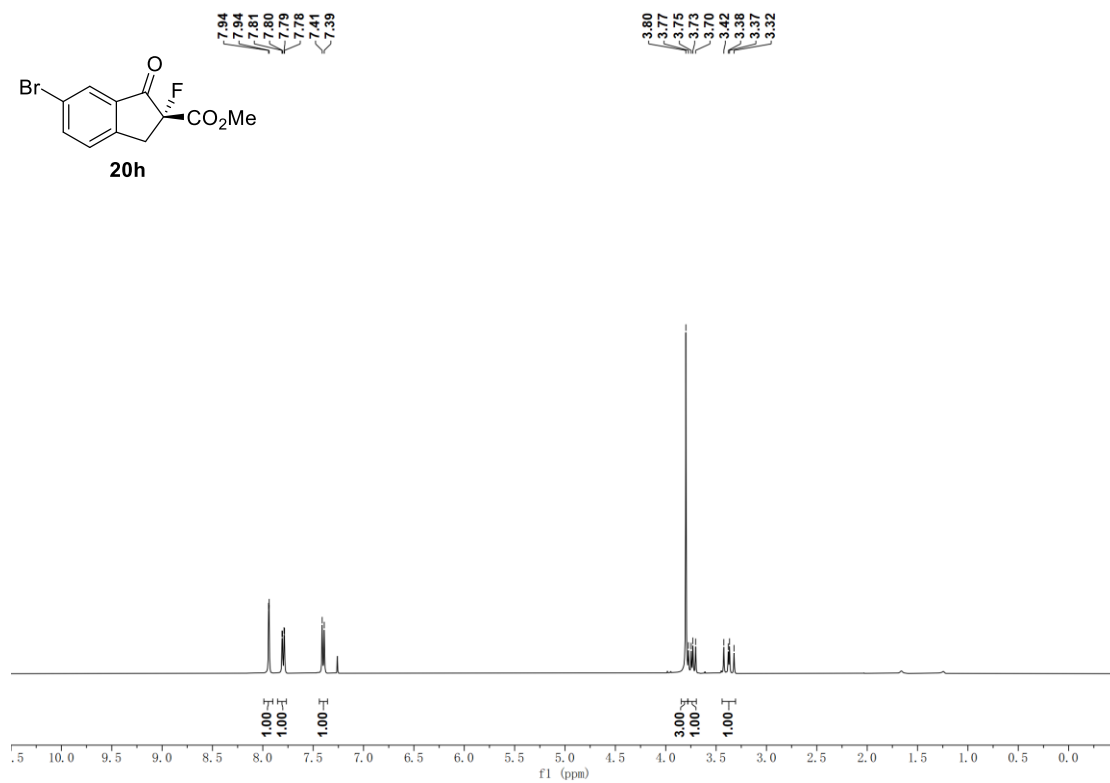

**Supplementary Figure 200.**  $^1\text{H}$  NMR Spectrum of **20h** (400 MHz,  $\text{CDCl}_3$ )

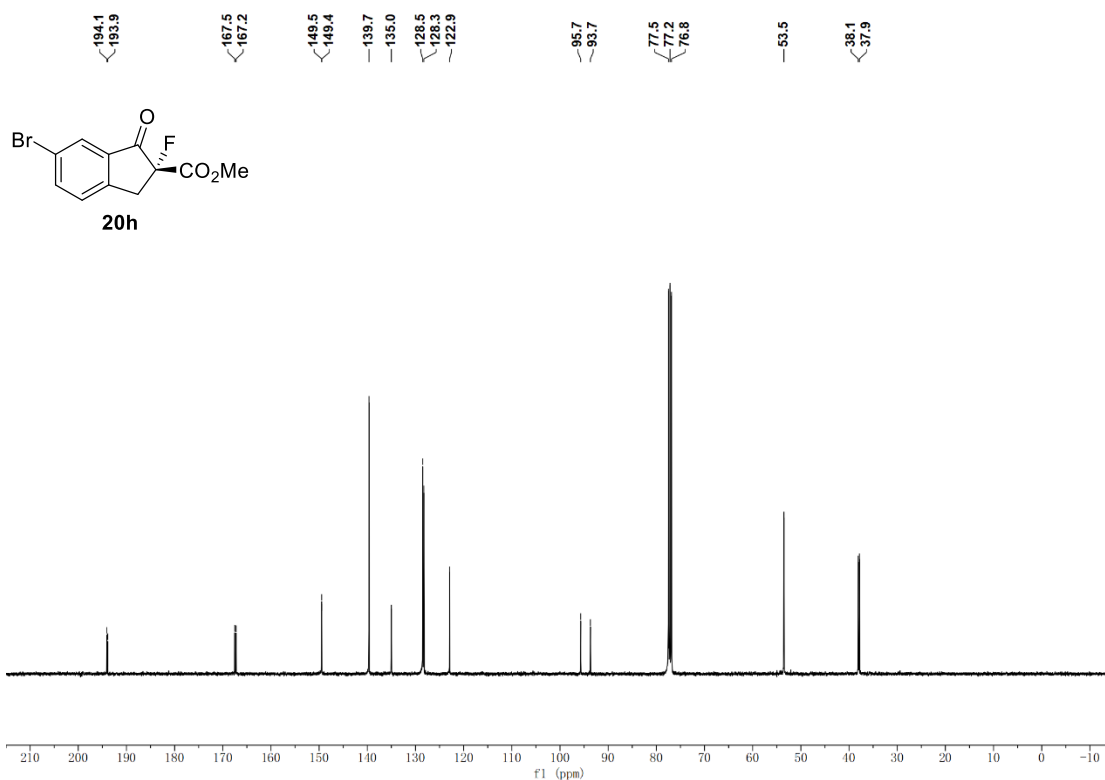

**Supplementary Figure 201.**  $^{13}\text{C}$  NMR Spectrum of **20h** (100 MHz,  $\text{CDCl}_3$ )

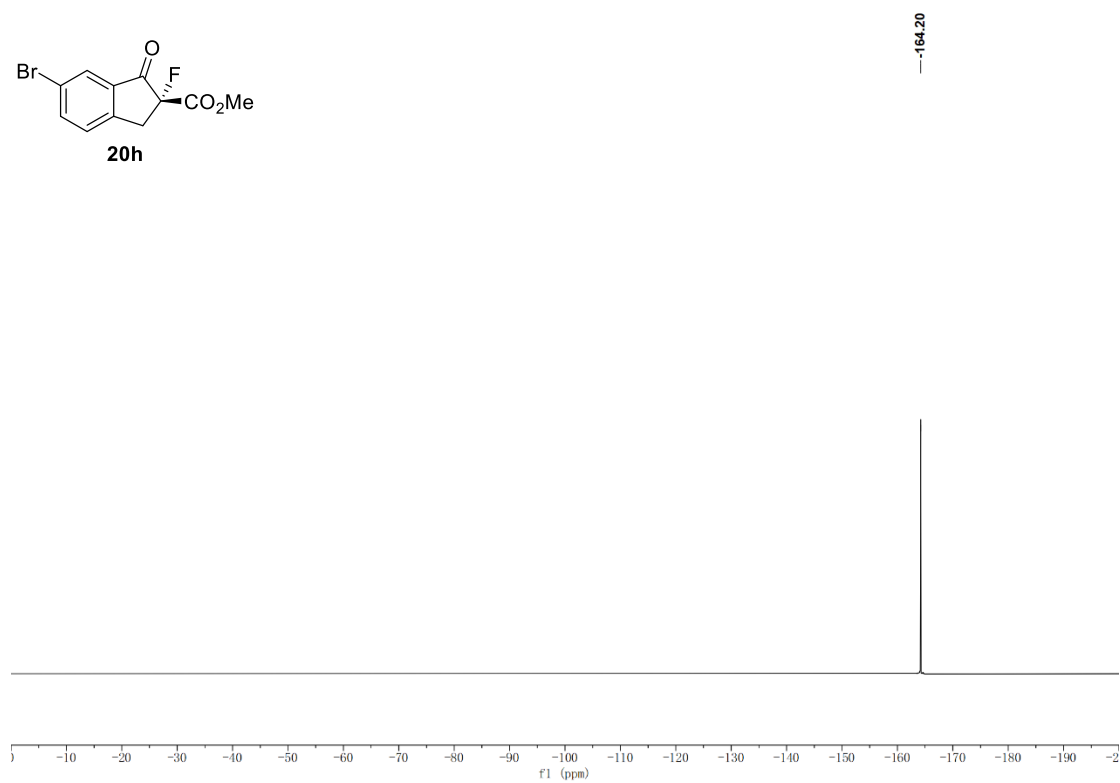

**Supplementary Figure 202.**  $^{19}\text{F}$  NMR Spectrum of **20h** (376 MHz,  $\text{CDCl}_3$ )

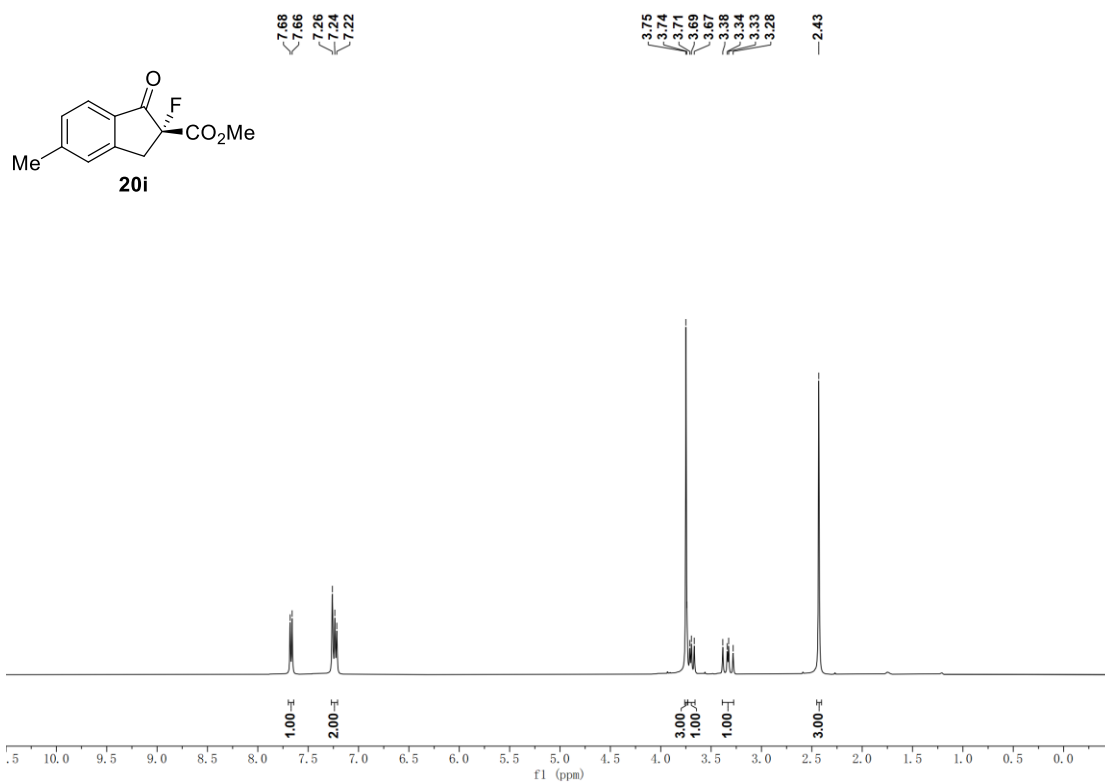

**Supplementary Figure 203.**  $^1\text{H}$  NMR Spectrum of **20i** (400 MHz, CDCl<sub>3</sub>)

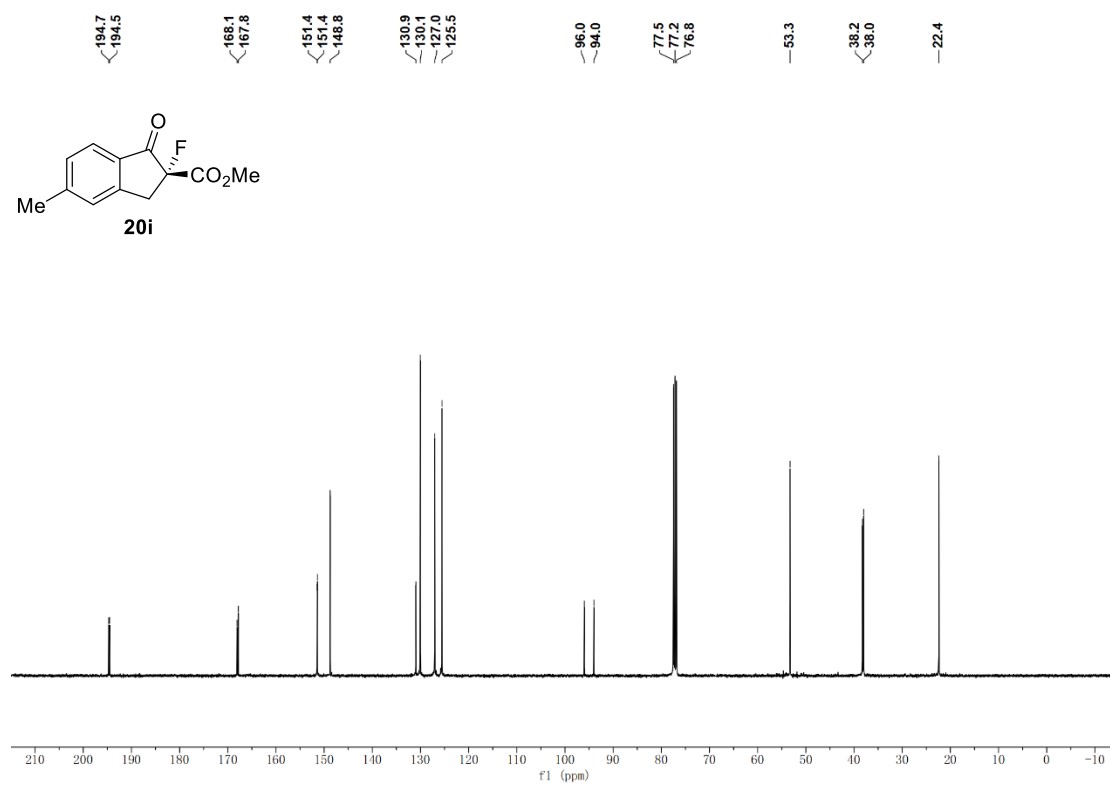

**Supplementary Figure 204.**  $^{13}\text{C}$  NMR Spectrum of **20i** (100 MHz, CDCl<sub>3</sub>)

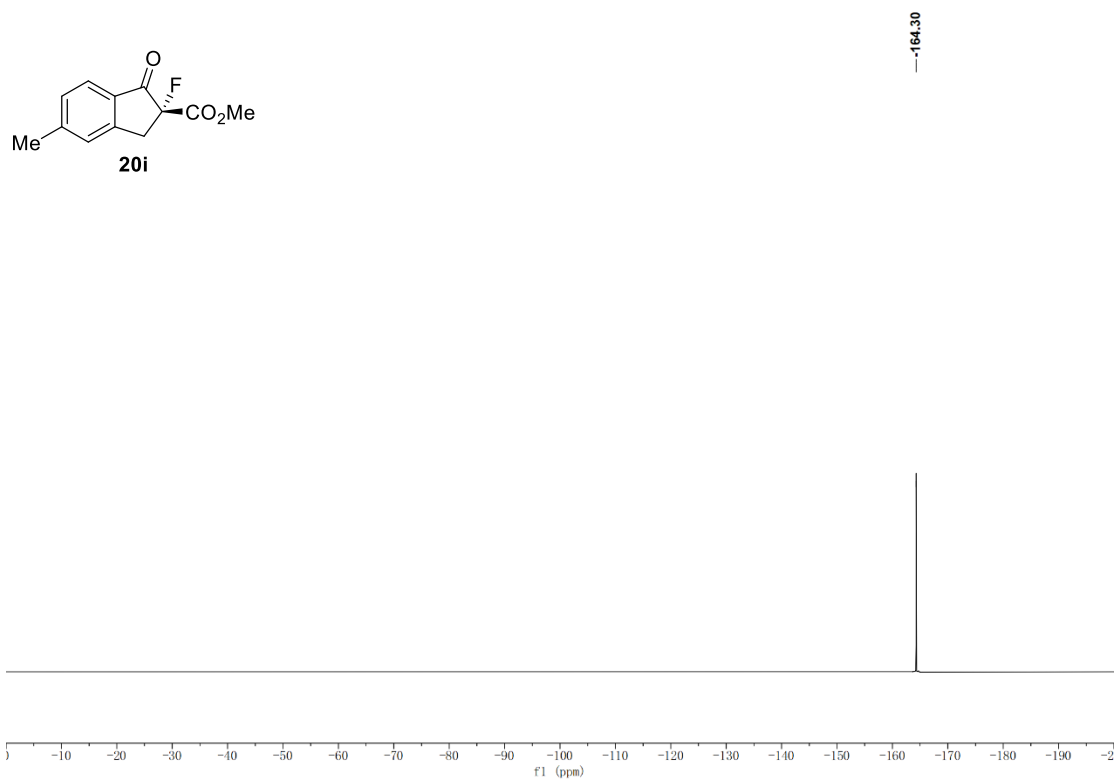

**Supplementary Figure 205.**  $^{19}\text{F}$  NMR Spectrum of **20i** (376 MHz,  $\text{CDCl}_3$ )

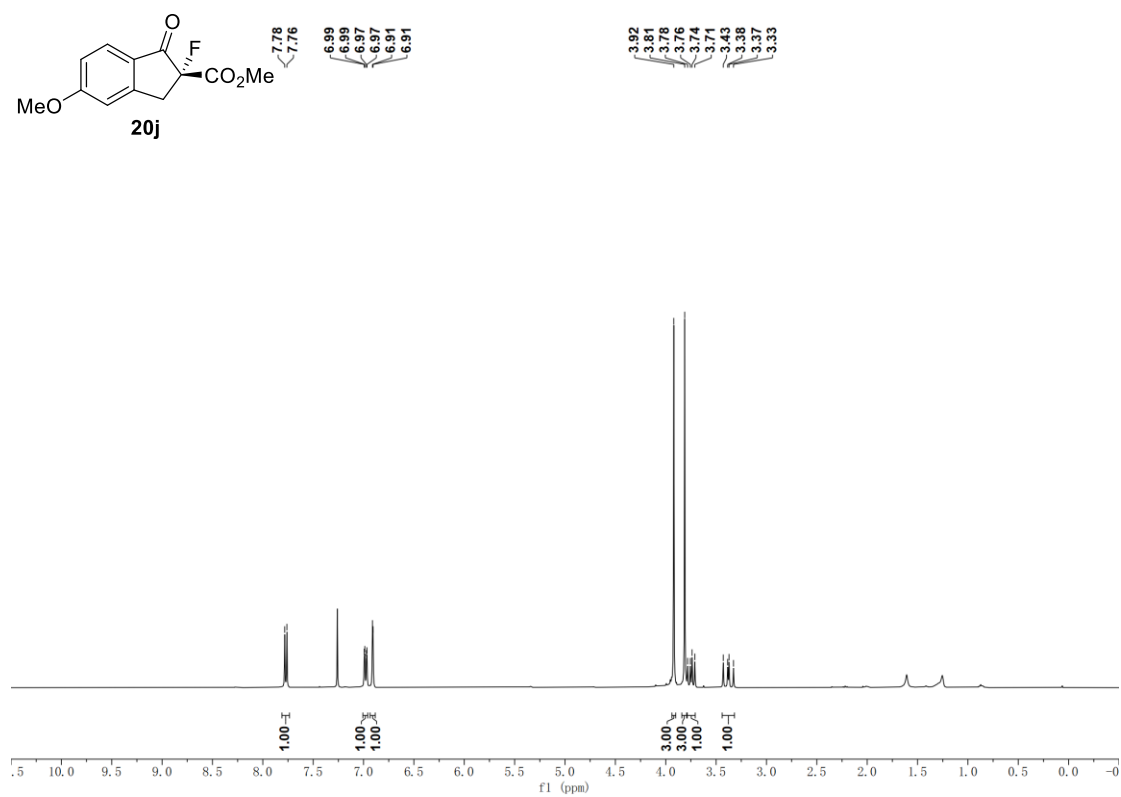

**Supplementary Figure 206.**  $^1\text{H}$  NMR Spectrum of **20j** (400 MHz,  $\text{CDCl}_3$ )

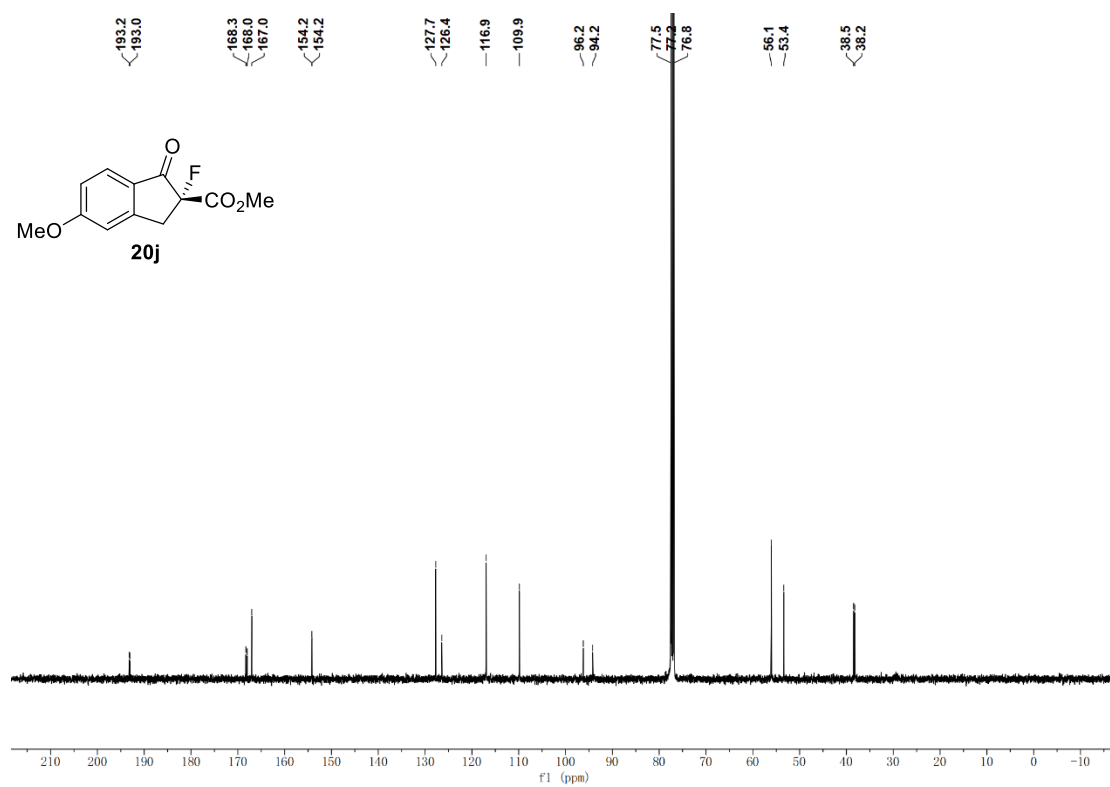

**Supplementary Figure 207.**  $^{13}\text{C}$  NMR Spectrum of **20j** (100 MHz,  $\text{CDCl}_3$ )

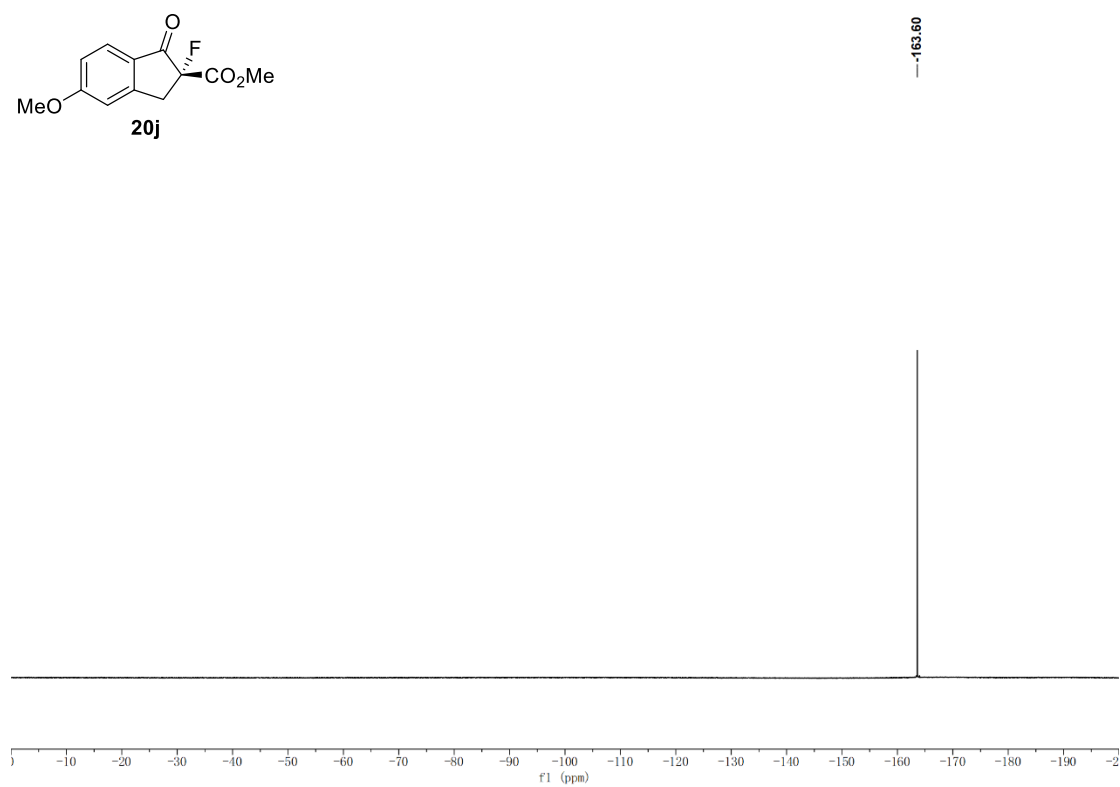

**Supplementary Figure 208.**  $^{19}\text{F}$  NMR Spectrum of **20j** (376 MHz,  $\text{CDCl}_3$ )

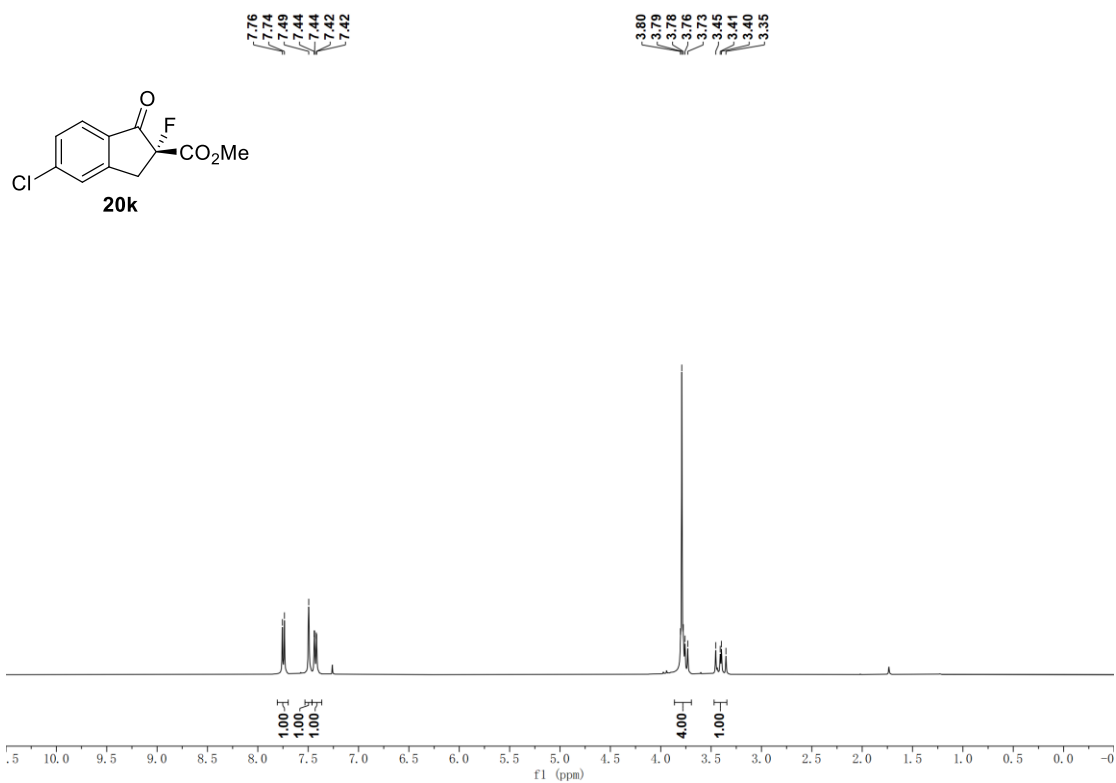

**Supplementary Figure 209.**  $^1\text{H}$  NMR Spectrum of **20k** (400 MHz,  $\text{CDCl}_3$ )

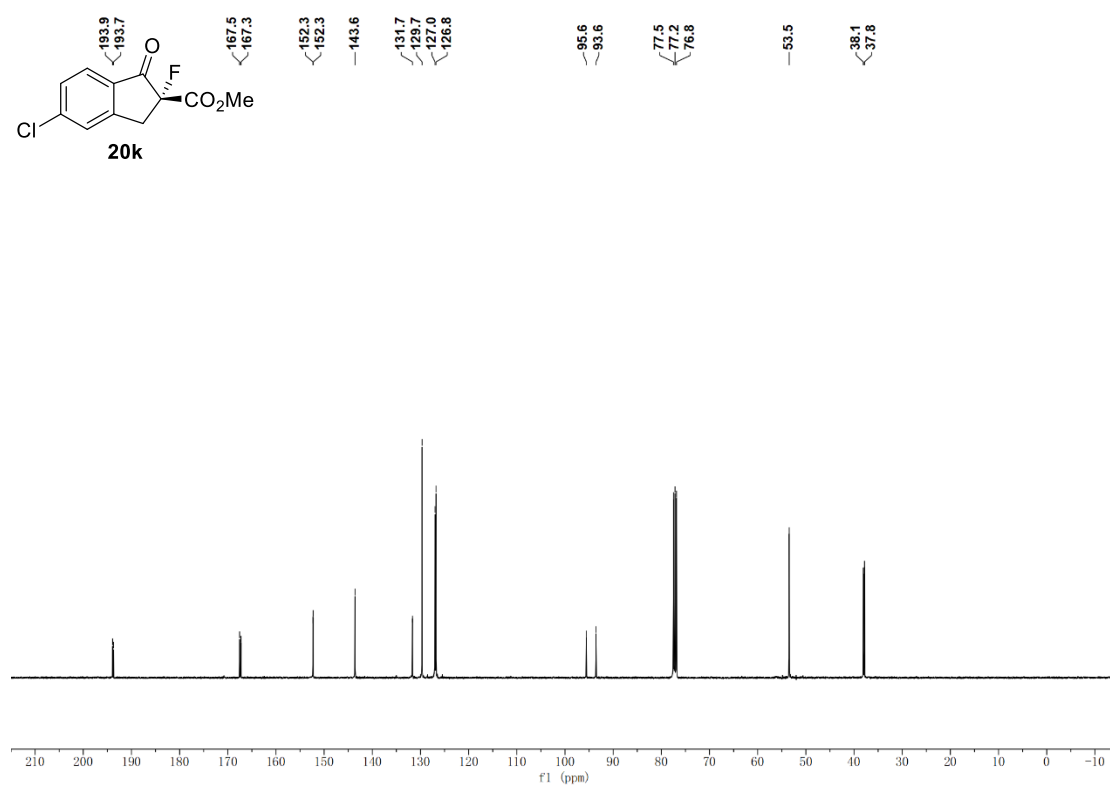

**Supplementary Figure 210.**  $^{13}\text{C}$  NMR Spectrum of **20k** (100 MHz,  $\text{CDCl}_3$ )

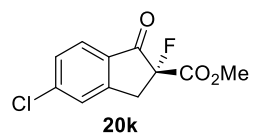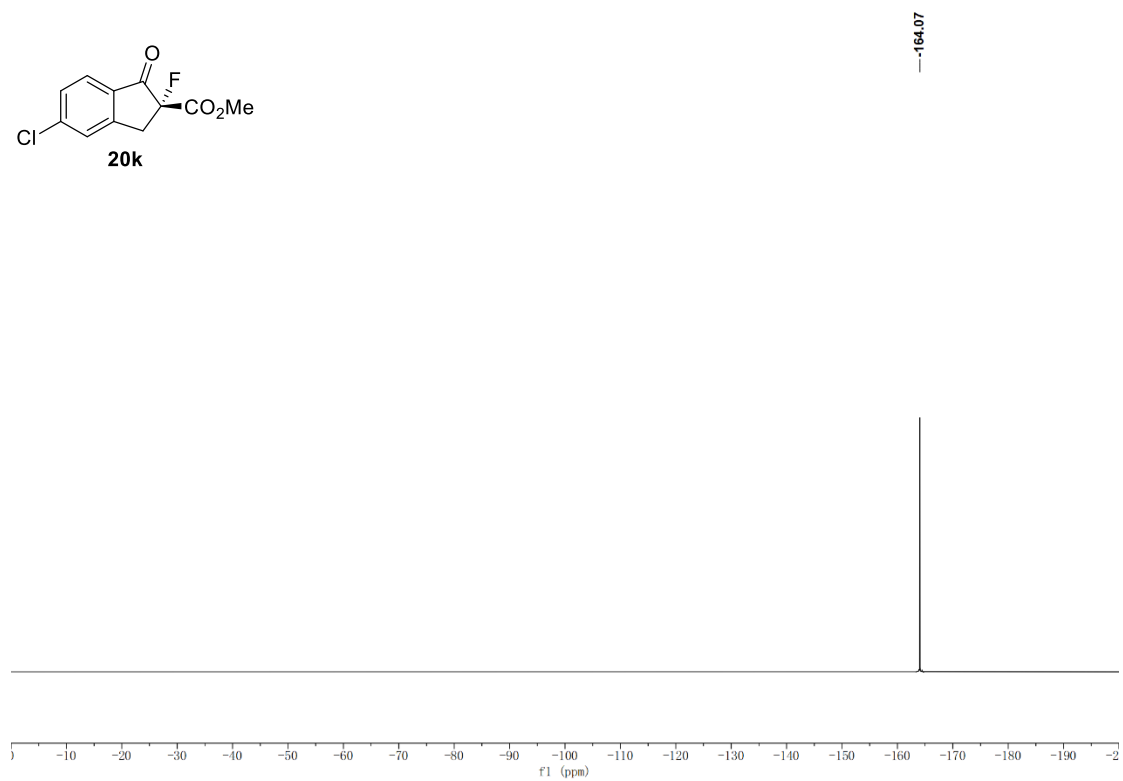

**Supplementary Figure 211.**  $^{19}\text{F}$  NMR Spectrum of **20i** (376 MHz,  $\text{CDCl}_3$ )
